# Supplementary material for: A quantitative prediction of the viscosity of ionic liquids using Sσ-profilemolecular descriptors
Source: Royal Society of Chemistry journal article supplement (doi:10.1039/c4cp04712e), 2014-12-17
Supplement: c4cp04712e1.xlsx [file c4cp04712e1.xlsx]

## Sheet: viscosity
No.	Data set	Name	Cited Refs.	p/kPa	T/K	logη(cp) (exp.)	MLR: logη(cp) (cal.)	MLR: relative deviation	SVM: logη(cp) (cal.)	SVM: relative deviation
1	training set	1,3-dimethylimidazolium bis(trifluoromethylsulfonyl)imide	H. Tokuda, K. Hayamizu, K. Ishii, M. A. B. H. Susan and M. Watanabe, J. Phys. Chem. B, 2005, 109, 6103-6110.	101.325	353.15	0.91803	0.83543	-8.99756	1.12945	23.0298
2	training set	1-methyl-3-ethylimidazolium bis(trifluoromethylsulfonyl)imide	J. M. Crosthwaite, M. J. Muldoon, J. N. K. Dixon, J. L. Anderson and J. F. Brennecke, J. Chem. Thermodyn, 2005, 37, 559-568.	101.325	343	0.95424	1.01184	6.03661	1.01414	6.27682
3	training set	1-butyl-3-methylimidazolium bis(trifluoromethylsulfonyl)imide	H. Tokuda, K. Hayamizu, K. Ishii, M. A. B. H. Susan and M. Watanabe, J. Phys. Chem. B, 2005, 109, 6103-6110.	101.325	353.15	0.96567	0.98703	2.21149	1.16943	21.1001
4	test set	1-ethyl-3-methylimidazolium bis(trifluoromethylsulfonyl)imide	H. Tokuda, K. Hayamizu, K. Ishii, M. A. B. H. Susan and M. Watanabe, J. Phys. Chem. B, 2005, 109, 6103-6110.	101.325	343.15	0.97359	1.00929	3.66722	1.01545	4.29914
5	test set	1-ethyl-3-methylimidazolium trifluromethane sulfonate	K. R. Seddon, A. S. Stark, M.J. Torres, M. Abraham, L. Moens, Eds., ACS Symposium Series 819, American Chemical Society: Washington DC, 2002, 34-49.	101.325	353.15	0.97543	0.75731	-22.3619	1.24935	28.082
6	training set	1-butyl-3-methyl-imidazolium bis(trifluoromethylsulfonyl)imide	K. R. Harris, M. Kanakubo, L. A. Bis(trifluoromethylsulfonyl)imide. Woolf, J. Chem. Eng. Data, 2007, 52, 1080-1085.	100	353.15	0.97909	0.98702	0.81	1.16943	19.4406
7	training set	1-butyl-3-methylimidazolium bis(trifluoromethylsulfonyl)imide	K. R. Harris, M. Kanakubo, L. A. Bis(trifluoromethylsulfonyl)imide. Woolf, J. Chem. Eng. Data, 2007, 52, 1080-1085.	100	353.15	0.97909	0.98702	0.81	1.16943	19.4406
8	training set	1-butyl pyridinium bis((trifluoromethyl)sulfonyl)amide	H. Tokuda, S. Tsuzuki, M. A. B. H. Susan, K. Hayamizu and M. Watanabe, J. Phys. Chem. B, 2006, 110, 19593-19600.	101.325	353.1	1	1.00532	0.53177	1.17734	17.7342
9	training set	1,3-dimethylimidazolium bis(trifluoromethylsulfonyl)imide	H. Tokuda, S. Tsuzuki, M. A. B. H. Susan, K. Hayamizu and M. Watanabe, J. Phys. Chem. B, 2006, 110, 19593-19600.	101.325	343.1	1	1.00628	0.62797	1.0115	1.1497
10	test set	1-methyl-3-methyl imidazolium bis(trifluoromethylsulfonyl)imide	H. Tokuda, K. Hayamizu, K. Ishii, M. A. B. H. Susan and M. Watanabe, J. Phys. Chem. B, 2005, 109, 6103-6110.	101.325	343.15	1.00604	1.00543	-0.06066	1.01196	0.58812
11	training	1-hexyl-3-methylimidazolium bis(trifluoromethylsulfonyl)imide	Christopher Hardacre, John D. Holbrey, Suhas P. Katdare and Kenneth R. Seddon, Alternating copolymerisation of styrene and carbon monoxide in ionic liquids, Green Chemistry, 4 (2002) 143-146.	101.325	353.15	1.02119	1.11432	9.12	1.23361	20.8014
12	test set	1-butyl-3-methyl-imidazolium bis(trifluoromethylsulfonyl)imide	K. R. Harris, M. Kanakubo, L. A. Bis(trifluoromethylsulfonyl)imide. Woolf, J. Chem. Eng. Data, 2007, 52, 1080-1085.	100	348.15	1.02531	1.07202	4.55576	1.16565	13.6874
13	test	1-hexyl-3-methylimidazolium bis(trifluoromethylsulfonyl)imide	Kenneth N. Marsh, Joan F. Brennecke, Robert D. Chirico，Michael Frenkel, Andreas Heintz, Joseph W. Magee, Cor J. Peters, Luis Paulo N. Rebelo, and Kenneth R. Seddon，Thermodynamic and thermophysical properties of the reference ionic liquid: 1-hexyl-3-methylimidazolium bis[(trifluoromethyl)sulfonyl]amide (including mixtures),Pure Appl. Chem., 2009 Vol.81 No.5 781-790.	101.325	353.14	1.02531	1.11449	8.69846	1.23362	20.3172
14	training set	1-hexyl-3-methylimidazolium bis(trifluoromethylsulfonyl)imide	H. Tokuda, K. Hayamizu, K. Ishii, M. A. B. H. Susan and M. Watanabe, J. Phys. Chem. B, 2005, 109, 6103-6110.	101.325	353.15	1.02898	1.11432	8.29382	1.23361	19.8868
15	training set	1-butyl-3-methylimidazolium bis(trifluoromethylsulfonyl)imide	K. R. Harris, M. Kanakubo, L. A. Bis(trifluoromethylsulfonyl)imide. Woolf, J. Chem. Eng. Data, 2007, 52, 1080-1085.	100	348.15	1.02938	1.07202	4.14236	1.16565	13.2379
16	training set	1-butyl-3-methylimidazolium bis((trifluoromethyl)sulfonyl)amide	K. R. Harris, M. Kanakubo, L. A. Bis(trifluoromethylsulfonyl)imide. Woolf, J. Chem. Eng. Data, 2007, 52, 1080-1085.	800	348.15	1.02938	1.07469	4.40213	1.16396	13.074
17	training set	1-hexyl-3-methylimidazolium bis(trifluoromethylsulfonyl)imide	H. Tokuda, S. Tsuzuki, M. A. B. H. Susan, K. Hayamizu and M. Watanabe, J. Phys. Chem. B, 2006, 110, 19593-19600.	101.325	353.1	1.03342	1.11517	7.91079	1.23365	19.3758
18	training set	1-butyl-3-methylimidazolium trifluoromethylsulfonate	K. R. Seddon, A. S. Stark, M.J. Torres, M. Abraham, L. Moens, Eds., ACS Symposium Series 819, American Chemical Society: Washington DC, 2002, 34-49.	101.325	363.15	1.04139	0.73504	-29.4177	1.25369	20.3858
19	training set	1-ethyl-3-methylimidazolium methylsulfate	A. J. L. Costa, J. M. S. S. Esperança, I. M. Marrucho and L. s. P. N. Rebelo, J. Chem. Eng. Data, 2011, 56, 3433-3441.	101.325	363.15	1.04139	1.11448	7.01803	1.2334	18.4379
20	training set	1-ethyl-3-methylimidazolium trifluoromethylsulfonate	H. Rodriguez, J. F. Brennecke, J. Chem. Eng. Data, 2006, 51, 2145-2155.	101.325	348.15	1.04139	0.84231	-19.1172	1.25312	20.3317
21	training	1-butyl-3-methylimidazolium bis(trifluoromethylsulfonyl)imide	McFarlane, J.; Ridenour, W. B.; Luo, H.; Hunt, R. D.; DePaoli, D. W.; Room Temperature Ionic Liquids for Separating Organics from Produced Water ; Sep. Sci. Technol., 40 (6) 1245-1265.	101.325	353.1	1.04139	0.98788	-5.13898	1.16931	12.2833
22	training	1-hexyl-3-methylimidazolium bis(trifluoromethylsulfonyl)imide	Kandil, M. E.; Marsh, K. N.; Goodwin, A. R. H.; Measurement of the Viscosity, Density, and Electrical Conductivity of 1-hexyl-3-methylimidazolium Bis(trifluorosulfonyl)imide at Temperatures between (288 and 433) K and Pressures below 50 Mpa; J. Chem. Eng. Data, 52 2382-2387.	101.325	353.15	1.04139	1.11432	7.00303	1.23361	18.4578
23	training set	1-ethyl-3-methylimidazolium nitrate	K. R. Seddon, A. S. Stark, M.J. Torres, M. Abraham, L. Moens, Eds., ACS Symposium Series 819, American Chemical Society: Washington DC, 2002, 34-49.	101.325	353.15	1.05308	1.41278	34.1571	1.26485	20.1092
24	training	1-hexyl-3-methylimidazolium bis(trifluoromethylsulfonyl)imide	Jason A. Widegren and Joseph W. Magee, Density, Viscosity, Speed of Sound, and Electrolytic Conductivity for the Ionic Liquid 1-hexyl-3-methylimidazolium Bis(trifluoromethylsulfonyl)imide and Its Mixtures with Water, J. Chem. Eng. Data, 52 (2007) 2331-2338.	101.325	353.15	1.05614	1.11432	5.50868	1.23361	16.8035
25	training	1-ethyl-3-methylimidazolium dicyanamide	Andreas P. Froba, Heiko Kremer, and Alfred Leipertz, Density, Refractive Index, Interfacial Tension, and Viscosity of Ionic Liquids [EMIM][EtSO4], [EMIM][NTf2], [EMIM][N(CN)2], and [OMA][NTf2] in Dependence on Temperature at Atmospheric Pressure, J. Phys. Chem. B, 112 (2008) 12420-12430.	101.325	313.15	1.0569	1.70069	60.9126	1.26889	20.0572
26	test	1-hexyl-3-methylimidazolium bis(trifluoromethylsulfonyl)imide	Kandil, M. E.; Marsh, K. N.; Goodwin, A. R. H.; Measurement of the Viscosity, Density, and Electrical Conductivity of 1-hexyl-3-methylimidazolium Bis(trifluorosulfonyl)imide at Temperatures between (288 and 433) K and Pressures below 50 Mpa; J. Chem. Eng. Data, 52 2382-2387.	101.325	353.15	1.0569	1.11432	5.43255	1.23361	16.7192
27	training	1-butyl-3-methylimidazolium tetrafluoroborate	Zhou, Q.; Wang, L.-S.; Densities and Viscosities of 1-butyl-3-methylimidazolium tetrafluoroborate + H2O Binary Mixtures from (303.15 to 353.15) K; J. Chem. Eng. Data, 51 905-908.	101.325	353.15	1.06032	1.18237	11.5111	1.23735	16.6957
28	training set	1-butyl-3-methylimidazolium bis((trifluoromethyl)sulfonyl)amide	H. Tokuda, K. Hayamizu, K. Ishii, M. A. B. H. Susan and M. Watanabe, J. Phys. Chem. B, 2005, 109, 6103-6110.	101.325	343.15	1.06183	1.15703	8.96525	1.17256	10.4282
29	test set	1-ethyl-3-methylimidazolium bis(trifluoromethylsulfonyl)imide	H. Tokuda, K. Hayamizu, K. Ishii, M. A. B. H. Susan and M. Watanabe, J. Phys. Chem. B, 2005, 109, 6103-6110.	101.325	333.15	1.06446	1.17929	10.788	0.98053	-7.8847
30	training set	1-ethyl-3-methylimidazolium trifluoromethylsulfonate	K. R. Seddon, A. S. Stark, M.J. Torres, M. Abraham, L. Moens, Eds., ACS Symposium Series 819, American Chemical Society: Washington DC, 2002, 34-49.	101.325	343.15	1.07188	0.92731	-13.488	1.27637	19.0772
31	training	1-ethyl-3-methylimidazolium bis(trifluoromethylsulfonyl)imide	Andreas P. Froba, Heiko Kremer, and Alfred Leipertz, Density, Refractive Index, Interfacial Tension, and Viscosity of Ionic Liquids [EMIM][EtSO4], [EMIM][NTf2], [EMIM][N(CN)2], and [OMA][NTf2] in Dependence on Temperature at Atmospheric Pressure, J. Phys. Chem. B, 112 (2008) 12420-12430.	101.325	333.15	1.07188	1.17929	10.0208	0.98053	-8.52253
32	training set	1-butyl-3-methylimidazolium tetrafluoroborate	K. R. Seddon, A. S. Stark, M.J. Torres, M. Abraham, L. Moens, Eds., ACS Symposium Series 819, American Chemical Society: Washington DC, 2002, 34-49.	101.325	363.15	1.07555	1.01237	-5.87383	1.28706	19.6652
33	training set	1-butyl-3-methylimidazolium bis(trifluoromethylsulfonyl)imide	K. R. Harris, M. Kanakubo, L. A. Bis(trifluoromethylsulfonyl)imide. Woolf, J. Chem. Eng. Data, 2007, 52, 1080-1085.	100	343.15	1.07918	1.15702	7.21295	1.17256	8.65315
34	training set	1-butyl-3-methylimidazolium bis(trifluoromethylsulfonyl)imide	K. R. Harris, M. Kanakubo, L. A. Bis(trifluoromethylsulfonyl)imide. Woolf, J. Chem. Eng. Data, 2007, 52, 1080-1085.	100	343.15	1.07918	1.15702	7.21295	1.17256	8.65315
35	test set	1-ethyl-3-methylimidazolium bis(trifluoromethylsulfonyl)amide	J. M. Crosthwaite, M. J. Muldoon, J. N. K. Dixon, J. L. Anderson and J. F. Brennecke, J. Chem. Thermodyn, 2005, 37, 559-568.	101.325	333	1.07918	1.18184	9.51312	0.98112	-9.08637
36	training	Tri-ethylsulfonium dicyanoamide	Gerhard D, Alpaslan S C, Gores H J, et al. Trialkylsulfonium dicyanamides - a new family of ionic liquids with very low viscosities. Chem. Commun. 2005. 40, 5080-5082.	101.325	313.15	1.08279	1.6876	55.8568	1.26551	16.8753
37	training set	1-ethyl-3-methylimidazolium methylsulfate	A. J. L. Costa, J. M. S. S. Esperança, I. M. Marrucho and L. s. P. N. Rebelo, J. Chem. Eng. Data, 2011, 56, 3433-3441.	101.325	358.15	1.08636	1.19948	10.4123	1.20631	11.0416
38	training set	1-butyl-3-methylimidazolium iodide	M. H. Ghatee, M. Zare, F. Moosavi and A. R. Zolghadr, J. Chem. Eng. Data, 2010, 55, 3084-3088.	101.325	388.15	1.09691	0.99082	-9.67198	1.30797	19.2416
39	training set	1-butyl pyridinium bis((trifluoromethyl)sulfonyl)amide	H. Tokuda, S. Tsuzuki, M. A. B. H. Susan, K. Hayamizu and M. Watanabe, J. Phys. Chem. B, 2006, 110, 19593-19600.	101.325	343.1	1.10037	1.17532	6.81114	1.18816	7.97856
40	test set	1-ethyl-3-methylimidazolium n-butylsulfate	A. J. L. Costa, J. M. S. S. Esperança, I. M. Marrucho and L. s. P. N. Rebelo, J. Chem. Eng. Data, 2011, 56, 3433-3441.	101.325	373.15	1.10037	0.83969	-23.69	1.41085	28.2157
41	training set	1-butyl-3-methylimidazolium thiocyanate	U. Domańska and M. Laskowska, J. Chem. Eng. Data, 2009, 54, 2113-2119.	101.325	338.15	1.1038	1.69269	53.3512	1.3148	19.1155
42	training set	1,3-dimethylimidazolium bis(trifluoromethylsulfonyl)imide	H. Tokuda, S. Tsuzuki, M. A. B. H. Susan, K. Hayamizu and M. Watanabe, J. Phys. Chem. B, 2006, 110, 19593-19600.	101.325	333.1	1.1038	1.17628	6.56638	0.97315	-11.8366
43	test set	1-octyl-3-methylimidazolium bis(trifluoromethylsulfonyl)amide	H. Tokuda, S. Tsuzuki, M. A. B. H. Susan, K. Hayamizu and M. Watanabe, J. Phys. Chem. B, 2006, 110, 19593-19600.	101.325	353.1	1.1038	1.21537	10.108	1.32183	19.7525
44	training set	1-butyl-3-methylimidazolium thiocyanate	U. Domańska and M. Laskowska, J. Chem. Eng. Data, 2009, 54, 2113-2119.	101.325	338.15	1.10483	1.69269	53.2082	1.3148	19.0044
45	training set	1,3-dimethylimidazolium bis(trifluoromethylsulfonyl)imide	H. Tokuda, K. Hayamizu, K. Ishii, M. A. B. H. Susan and M. Watanabe, J. Phys. Chem. B, 2005, 109, 6103-6110.	101.325	333.15	1.10551	1.17543	6.32466	0.97297	-11.9887
46	training set	1-octyl-3-methylimidazolium bis(trifluoromethylsulfonyl)amide	H. Tokuda, K. Hayamizu, K. Ishii, M. A. B. H. Susan and M. Watanabe, J. Phys. Chem. B, 2005, 109, 6103-6110.	101.325	353.15	1.10958	1.21452	9.45779	1.32183	19.1288
47	training set	1-butyl-3-methylimidazolium trifluoroacetate	H. Tokuda, K. Hayamizu, K. Ishii, Md. A. B. H. Susan, M. Watanabe, J. Phys. Chem. B, 2004, 108, 16593-16600.	101.325	343.1	1.11394	1.19726	7.47967	1.32599	19.0362
48	training set	1-ethyl-3-methylimidazolium trifluoromethylsulfonate	H. Rodriguez, J. F. Brennecke, J. Chem. Eng. Data, 2006, 51, 2145-2155.	101.325	338.15	1.11394	1.01231	-9.12391	1.31453	18.0074
49	training set	1-butyl-3-methylimidazolium trifluoromethylsulfonate	H. Tokuda, S. Tsuzuki, M. A. B. H. Susan, K. Hayamizu and M. Watanabe, J. Phys. Chem. B, 2006, 110, 19593-19600.	101.325	353.1	1.11394	0.90589	-18.6772	1.25571	12.7265
50	test set	1-butyl-1-methyl pyrrolidinium bis(trifluoromethylsulfonyl)imide	H. Tokuda, S. Tsuzuki, M. A. B. H. Susan, K. Hayamizu and M. Watanabe, J. Phys. Chem. B, 2006, 110, 19593-19600.	101.325	353.1	1.11727	0.96565	-13.5704	1.15931	3.76297
51	training set	1-butyl-3-methylimidazolium tetrafluoroborate	D.Tomida, A.Kumagai, K.Qiao, C.Yokoyama, Int. J. Thermophys, 2006, 27, 39-47.	100	353.15	1.12057	1.18237	5.51496	1.23735	10.4215
52	training	Methyldiethylsulfonium dicyanoamide	Gerhard D, Alpaslan S C, Gores H J, et al. Trialkylsulfonium dicyanamides - a new family of ionic liquids with very low viscosities. Chem. Commun. 2005. 40, 5080-5082.	101.325	313.15	1.12057	1.68799	50.6363	1.26557	12.9393
53	training set	1-ethyl-3-methylimidazolium hexafluorophosphate	K. R. Seddon, A. S. Stark, M.J. Torres, M. Abraham, L. Moens, Eds., ACS Symposium Series 819, American Chemical Society: Washington DC, 2002, 34-49.	101.325	363.1	1.12385	1.26894	12.9096	1.27615	13.5518
54	training set	1-butyl-3-methylimidazolium bis(trifluoromethylsulfonyl)imide	K. R. Harris, M. Kanakubo, L. A. Bis(trifluoromethylsulfonyl)imide. Woolf, J. Chem. Eng. Data, 2007, 52, 1080-1085.	25700	348.15	1.1271	1.16981	3.78961	1.21337	7.65378
55	training set	1-ethyl-3-methylimidazolium methylsulfate	A. J. L. Costa, J. M. S. S. Esperança, I. M. Marrucho and L. s. P. N. Rebelo, J. Chem. Eng. Data, 2011, 56, 3433-3441.	101.325	353.15	1.13354	1.28448	13.3154	1.20923	6.67698
56	training	1-ethyl-3-methylimidazolium ethylsulfate	Ergun Altin, Johannes Gradl, Wolfgang Peukert, First Studies on the Rheological Behavior of Suspensions in Ionic Liquids, Chem. Eng. Technol., 29 (2006) No.11 1347-1354.	101.325	353.15	1.13354	1.32604	16.9821	1.34464	18.6228
57	test set	1-butyl-3-methylimidazolium tetrafluoroborate	D.Tomida, A.Kumagai, K.Qiao, C.Yokoyama, Int. J. Thermophys, 2006, 27, 39-47.	5000	353.15	1.13354	1.20109	5.95894	1.23381	8.84585
58	training set	1-hexyl-3-methylimidazolium bis(trifluoromethylsulfonyl)amide	H. Tokuda, K. Hayamizu, K. Ishii, M. A. B. H. Susan and M. Watanabe, J. Phys. Chem. B, 2005, 109, 6103-6110.	101.325	343.15	1.1364	1.28432	13.0167	1.26149	11.0075
59	training	1-hexyl-3-methylimidazolium bis(trifluoromethylsulfonyl)imide	Kenneth N. Marsh, Joan F. Brennecke, Robert D. Chirico，Michael Frenkel, Andreas Heintz, Joseph W. Magee, Cor J. Peters, Luis Paulo N. Rebelo, and Kenneth R. Seddon，Thermodynamic and thermophysical properties of the reference ionic liquid: 1-hexyl-3-methylimidazolium bis[(trifluoromethyl)sulfonyl]amide (including mixtures),Pure Appl. Chem., 2009 Vol.81 No.5 781-790.	101.325	343.15	1.13672	1.28432	12.9848	1.26149	10.9762
60	training set	1-butyl-3-methylimidazolium trifluoromethylsulfonate	K. R. Seddon, A. S. Stark, M.J. Torres, M. Abraham, L. Moens, Eds., ACS Symposium Series 819, American Chemical Society: Washington DC, 2002, 34-49.	101.325	353.15	1.13988	0.90504	-20.6024	1.25542	10.1359
61	training set	1-butyl-3-methyl pyridinium bis((trifluoromethyl)sulfonyl)amide	J. M. Crosthwaite, M. J. Muldoon, J. N. K. Dixon, J. L. Anderson and J. F. Brennecke, J. Chem. Thermodyn, 2005, 37, 559-568.	101.325	343	1.14613	1.12949	-1.45169	1.14307	-0.2666
62	training	1-butyl-3-methylimidazolium bis(trifluoromethylsulfonyl)imide	O.O. Okoturo, T.J. VanderNoot, Temperature dependence of viscosity for room temperature ionic liquids, Journal of Electroanalytical Chemistry, 568 (2004) 167–181	101.325	343.15	1.14613	1.15703	0.95083	1.17256	2.30619
63	training set	1-butyl-3-methyl imidazolium bis(pentafluoroethylsulfonyl)imide	H. Tokuda, S. Tsuzuki, M. A. B. H. Susan, K. Hayamizu and M. Watanabe, J. Phys. Chem. B, 2006, 110, 19593-19600.	101.325	353.1	1.14922	0.90284	-21.4389	1.26646	10.202
64	training set	1-hexyl-3-methylimidazolium bis(trifluoromethylsulfonyl)imide	H. Tokuda, S. Tsuzuki, M. A. B. H. Susan, K. Hayamizu and M. Watanabe, J. Phys. Chem. B, 2006, 110, 19593-19600.	101.325	343.1	1.14922	1.28517	11.8299	1.26165	9.78358
65	training set	1-butyl-3-methylimidazolium tetrafluoroborate	D.Tomida, A.Kumagai, K.Qiao, C.Yokoyama, Int. J. Thermophys, 2006, 27, 39-47.	10000	353.15	1.14922	1.22019	6.17523	1.2396	7.8648
66	training	Ethyldimethylsulfonium dicyanoamide	Gerhard D, Alpaslan S C, Gores H J, et al. Trialkylsulfonium dicyanamides - a new family of ionic liquids with very low viscosities. Chem. Commun. 2005. 40, 5080-5082.	101.325	313.15	1.14922	1.68761	46.8487	1.26551	10.1193
67	test set	Trimethyl(butyl)ammonium bis(trifluoromethylsulfonyl)imide	H. Tokuda, S. Tsuzuki, M. A. B. H. Susan, K. Hayamizu and M. Watanabe, J. Phys. Chem. B, 2006, 110, 19593-19600.	101.325	353.1	1.14922	0.95008	-17.3286	1.15259	0.29325
68	training set	1-ethyl-3-methylimidazolium n-butylsulfate	A. J. L. Costa, J. M. S. S. Esperança, I. M. Marrucho and L. s. P. N. Rebelo, J. Chem. Eng. Data, 2011, 56, 3433-3441.	101.325	368.15	1.15229	0.92469	-19.7518	1.36348	18.328
69	training set	1-butyl-3-methylimidazolium iodide	M. H. Ghatee, M. Zare, F. Moosavi and A. R. Zolghadr, J. Chem. Eng. Data, 2010, 55, 3084-3088.	101.325	383.15	1.16167	1.07582	-7.39048	1.22889	5.78633
70	training	1-hexyl-3-methylimidazolium bis(trifluoromethylsulfonyl)imide	Jason A. Widegren and Joseph W. Magee, Density, Viscosity, Speed of Sound, and Electrolytic Conductivity for the Ionic Liquid 1-hexyl-3-methylimidazolium Bis(trifluoromethylsulfonyl)imide and Its Mixtures with Water, J. Chem. Eng. Data, 52 (2007) 2331-2338.	101.325	343.15	1.16376	1.28432	10.3599	1.26149	8.39797
71	training set	1-butyl-3-methylimidazolium tetrafluoroborate	D.Tomida, A.Kumagai, K.Qiao, C.Yokoyama, Int. J. Thermophys, 2006, 27, 39-47.	15000	353.15	1.16435	1.23929	6.43595	1.25418	7.71528
72	training set	1-butyl-3-methylimidazolium nitrate	K. R. Seddon, A. S. Stark, M.J. Torres, M. Abraham, L. Moens, Eds., ACS Symposium Series 819, American Chemical Society: Washington DC, 2002, 34-49.	101.325	363.15	1.16435	1.39051	19.4241	1.35957	16.7666
73	training set	1-ethyl-3-methylimidazolium nitrate	K. R. Seddon, A. S. Stark, M.J. Torres, M. Abraham, L. Moens, Eds., ACS Symposium Series 819, American Chemical Society: Washington DC, 2002, 34-49.	101.325	343.15	1.16732	1.58278	35.5911	1.29333	10.7946
74	training set	1-ethyl-3-methylimidazolium bis(trifluoromethylsulfonyl)imide	H. Tokuda, K. Hayamizu, K. Ishii, M. A. B. H. Susan and M. Watanabe, J. Phys. Chem. B, 2005, 109, 6103-6110.	101.325	323.15	1.1682	1.34929	15.502	1.1179	-4.30549
75	training set	1-butyl-3-methyl-imidazolium bis(trifluoromethylsulfonyl)imide	H. Tokuda, K. Hayamizu, K. Ishii, M. A. B. H. Susan and M. Watanabe, J. Phys. Chem. B, 2005, 109, 6103-6110.	101.325	333.15	1.17026	1.32703	13.3958	1.21866	4.13559
76	training	1-ethyl-3-methylimidazolium bis(trifluoromethylsulfonyl)imide	Andreas P. Froba, Heiko Kremer, and Alfred Leipertz, Density, Refractive Index, Interfacial Tension, and Viscosity of Ionic Liquids [EMIM][EtSO4], [EMIM][NTf2], [EMIM][N(CN)2], and [OMA][NTf2] in Dependence on Temperature at Atmospheric Pressure, J. Phys. Chem. B, 112 (2008) 12420-12430.	101.325	323.15	1.17319	1.34929	15.011	1.1179	-4.71221
77	training set	1-butyl-3-methylimidazolium trifluoroacetate	J. M. Crosthwaite, M. J. Muldoon, J. N. K. Dixon, J. L. Anderson and J. F. Brennecke, J. Chem. Thermodyn, 2005, 37, 559-568.	101.325	343	1.17609	1.19896	1.9445	1.32579	12.7289
78	training set	1-hexyl-3-methylimidazolium bis(trifluoromethylsulfonyl)amide	J. M. Crosthwaite, M. J. Muldoon, J. N. K. Dixon, J. L. Anderson and J. F. Brennecke, J. Chem. Thermodyn, 2005, 37, 559-568.	101.325	343	1.17609	1.28687	9.41949	1.26198	7.30343
79	training set	1-ethyl-3-methylimidazolium trifluoromethylsulfonate	K. R. Seddon, A. S. Stark, M.J. Torres, M. Abraham, L. Moens, Eds., ACS Symposium Series 819, American Chemical Society: Washington DC, 2002, 34-49.	101.325	333.15	1.17609	1.09731	-6.69889	1.36268	15.8651
80	training set	1-ethyl-3-methylimidazolium bis{(trifluoromethyl)sulfonyl}imide	J. M. Crosthwaite, M. J. Muldoon, J. N. K. Dixon, J. L. Anderson and J. F. Brennecke, J. Chem. Thermodyn, 2005, 37, 559-568.	101.325	323	1.17609	1.35184	14.9439	1.12142	-4.64828
81	training set	1-butyl-3-methylimidazolium tetrafluoroborate	D.Tomida, A.Kumagai, K.Qiao, C.Yokoyama, Int. J. Thermophys, 2006, 27, 39-47.	20000	353.15	1.17609	1.25839	6.99751	1.27652	8.539
82	training set	1-butyl-3-methylimidazolium octylsulfate	J. Jacquemin, P. Husson, V. Majer, A. A. H. Padua and M. F. C. Gomes, Green Chem., 2008, 10, 944-950.	101.325	395.32	1.17898	0.37233	-68.4191	1.39078	17.9643
83	training set	1-ethyl-3-methylimidazolium methylsulfate	A. J. L. Costa, J. M. S. S. Esperança, I. M. Marrucho and L. s. P. N. Rebelo, J. Chem. Eng. Data, 2011, 56, 3433-3441.	101.325	348.15	1.18469	1.36948	15.5978	1.23797	4.49756
84	training set	1-butyl-3-methylimidazolium bis((trifluoromethyl)sulfonyl)amide	K. R. Harris, M. Kanakubo, L. A. Bis(trifluoromethylsulfonyl)imide. Woolf, J. Chem. Eng. Data, 2007, 52, 1080-1085.	100	333.15	1.18752	1.32702	11.7472	1.21866	2.62223
85	training	1-ethyl-3-methylimidazolium dicyanamide	Andreas P. Froba, Heiko Kremer, and Alfred Leipertz, Density, Refractive Index, Interfacial Tension, and Viscosity of Ionic Liquids [EMIM][EtSO4], [EMIM][NTf2], [EMIM][N(CN)2], and [OMA][NTf2] in Dependence on Temperature at Atmospheric Pressure, J. Phys. Chem. B, 112 (2008) 12420-12430.	101.325	303.15	1.18752	1.87069	57.5293	1.26733	6.72076
86	training set	1-butyl-3-methylimidazolium bis(trifluoromethylsulfonyl)imide	K. R. Harris, M. Kanakubo, L. A. Bis(trifluoromethylsulfonyl)imide. Woolf, J. Chem. Eng. Data, 2007, 52, 1080-1085.	100	333.15	1.19033	1.32702	11.4834	1.21866	2.37997
87	training set	1-butyl-3-methylimidazolium tetrafluoroborate	K. R. Seddon, A. S. Stark, M.J. Torres, M. Abraham, L. Moens, Eds., ACS Symposium Series 819, American Chemical Society: Washington DC, 2002, 34-49.	101.325	353.15	1.19033	1.18237	-0.66838	1.23735	3.94999
88	training	1-butyl-3-methylimidazolium tetrafluoroborate	Zhou, Q.; Wang, L.-S.; Densities and Viscosities of 1-butyl-3-methylimidazolium tetrafluoroborate + H2O Binary Mixtures from (303.15 to 353.15) K; J. Chem. Eng. Data, 51 905-908.	101.325	343.15	1.1934	1.35237	13.3208	1.21154	1.51942
89	training set	1-butylpyridinium tetrafluoroborate	B. Mokhtarani, A. Sharifi, H. R. Mortaheb, M. Mirzaei, M. Mafi and F. Sadeghian, J. Chem. Thermodyn, 2009, 41, 323-329.	101.325	353.15	1.19976	1.19982	0.00467	1.25233	4.38188
90	training set	1-butyl-1-methyl pyrrolidinium bis(trifluoromethylsulfonyl)imide	H. Tokuda, S. Tsuzuki, M. A. B. H. Susan, K. Hayamizu and M. Watanabe, J. Phys. Chem. B, 2006, 110, 19593-19600.	101.325	343.1	1.2014	1.13565	-5.47264	1.15108	-4.18866
91	test set	1-butyl-3-methylimidazolium tetrafluoroborate	K. R. Harris, M. Kanakubo and L. A. Woolf, J. Chem. Eng. Data, 2007, 52, 2425-2430.	100	348.15	1.2014	1.26737	5.49101	1.2204	1.58155
92	training	1-ethyl-3-methylimidazolium tetrafluoroborate	Zhang, S.; Li, X.; Chen, H.; Wang, J.; Zhang, J.; Zhang, M.; Determination of Physical Properties for the Binary System of 1-ethyl-3-methylimidazolium tetrafluoroborate + H2O; J. Chem. Eng. Data, 49 760-764.	101.325	323.15	1.20148	1.54464	28.5617	1.1166	-7.0646
93	training set	1-hexyl pyridinium bis((trifluoromethyl)sulfonyl)amide	J. M. Crosthwaite, M. J. Muldoon, J. N. K. Dixon, J. L. Anderson and J. F. Brennecke, J. Chem. Thermodyn, 2005, 37, 559-568.	101.325	343	1.20412	1.25424	4.16269	1.24304	3.23199
94	training set	1-ethyl-3-methylimidazolium trifluromethane sulfonate	H. Rodriguez, J. F. Brennecke, J. Chem. Eng. Data, 2006, 51, 2145-2155.	101.325	328.15	1.20412	1.18231	-1.81169	1.41671	17.655
95	training set	1-ethyl-3-methylimidazolium n-butylsulfate	A. J. L. Costa, J. M. S. S. Esperança, I. M. Marrucho and L. s. P. N. Rebelo, J. Chem. Eng. Data, 2011, 56, 3433-3441.	101.325	363.15	1.20412	1.00969	-16.1469	1.34185	11.4383
96	test	1-ethyl-3-methylimidazolium dicyanamide	Andrew P. Abbott and Katy J. McKenzie, Application of ionic liquids to the electrodeposition of metals, Phys. Chem. Chem. Phys., 8 (2006), 4265-4279.	101.325	298	1.20412	1.95824	62.6286	1.35912	12.8728
97	training set	1,3-dimethylimidazolium methylsulfate	A. B. Pereiro, F. Santamarta, E. Tojo, A. Rodrı´guez, J. Tojo, J. Chem. Eng. Data, 2006, 51, 952-954	101.325	343.15	1.20439	1.45061	20.4436	1.28932	7.05156
98	training	1-ethyl-3-methylimidazolium dicyanamide	Yukihiro Yoshida, Osamu Baba, and Gunzi Saito, Ionic Liquids Based on Dicyanamide Anion: Influence of Structural Variations in Cationic Structures on Ionic Conductivity, J. Phys. Chem. B, 111 (2007) 4742-4749.	101.325	298.15	1.20683	1.95569	62.0526	1.35577	12.3417
99	training set	1-butyl-1-methyl pyrrolidinium bis(trifluoromethylsulfonyl)imide	A. B. Pereiro, H. I. M. Veiga, J. M. S. S. Esperanca and A. Rodriguez, J. Chem. Thermodyn., 2009, 41, 1419–1423.	101.325	343.15	1.20737	1.1348	-6.01044	1.15101	-4.6676
100	training set	1-butyl-3-methylimidazolium tetrafluoroborate	K. R. Harris, M. Kanakubo and L. A. Woolf, J. Chem. Eng. Data, 2007, 52, 2425-2430.	100	348.15	1.20952	1.26737	4.78281	1.2204	0.8996
101	training set	1-butyl-3-methylimidazolium trifluoromethylsulfonate	M. L. Ge, R. S. Zhao, Y. F. Yi, Q. Zhang and L. S. Wang, J. Chem. Eng. Data, 2008, 53, 2408-2411.	101.325	343.15	1.21421	1.07504	-11.462	1.35882	11.91
102	training set	1-butyl-3-methylimidazolium bis(trifluoromethylsulfonyl)imide	K. R. Harris, M. Kanakubo, L. A. Bis(trifluoromethylsulfonyl)imide. Woolf, J. Chem. Eng. Data, 2007, 52, 1080-1085.	50700	348.15	1.21484	1.26531	4.15468	1.37605	13.2699
103	training set	1,3-dimethylimidazolium bis(trifluoromethylsulfonyl)imide	H. Tokuda, S. Tsuzuki, M. A. B. H. Susan, K. Hayamizu and M. Watanabe, J. Phys. Chem. B, 2006, 110, 19593-19600.	101.325	323.1	1.21484	1.34628	10.8195	1.10845	-8.7577
104	test set	1-methyl-3-methyl imidazolium bis(trifluoromethylsulfonyl)imide	H. Tokuda, K. Hayamizu, K. Ishii, M. A. B. H. Susan and M. Watanabe, J. Phys. Chem. B, 2005, 109, 6103-6110.	101.325	323.15	1.2188	1.34543	10.3897	1.10729	-9.14909
105	training set	1-hexyl-3-methylimidazolium tetrafluoroborate	K. R. Seddon, A. S. Stark, M.J. Torres, M. Abraham, L. Moens, Eds., ACS Symposium Series 819, American Chemical Society: Washington DC, 2002, 34-49.	101.325	363.15	1.22011	1.13967	-6.59284	1.35772	11.2784
106	training set	1-octyl-3-methylimidazolium bis(trifluoromethylsulfonyl)imide	H. Tokuda, S. Tsuzuki, M. A. B. H. Susan, K. Hayamizu and M. Watanabe, J. Phys. Chem. B, 2006, 110, 19593-19600.	101.325	343.1	1.22272	1.38537	13.3025	1.33303	9.02196
107	training set	1-butyl-3-methylimidazolium thiocyanate	U. Domańska and M. Laskowska, J. Chem. Eng. Data, 2009, 54, 2113-2119.	101.325	328.15	1.22272	1.86269	52.3399	1.38912	13.6094
108	test set	1-butylpyridinium bis(trifluoromethylsulfonyl)imide	H. Tokuda, S. Tsuzuki, M. A. B. H. Susan, K. Hayamizu and M. Watanabe, J. Phys. Chem. B, 2006, 110, 19593-19600.	101.325	333.1	1.22272	1.34532	10.0266	1.23612	1.09588
109	training set	1-octyl-3-methylimidazolium bis(trifluoromethylsulfonyl)imide	H. Tokuda, K. Hayamizu, K. Ishii, M. A. B. H. Susan and M. Watanabe, J. Phys. Chem. B, 2005, 109, 6103-6110.	101.325	343.15	1.22324	1.38452	13.1848	1.333	8.97283
110	test set	1-butyl-3-methylimidazolium trifluoromethane sulfonate	H. Tokuda, S. Tsuzuki, M. A. B. H. Susan, K. Hayamizu and M. Watanabe, J. Phys. Chem. B, 2006, 110, 19593-19600.	101.325	343.1	1.22789	1.07589	-12.3792	1.35953	10.7206
111	training	1-ethyl-3-methylimidazolium dicyanamide	Yukihiro Yoshida, Koji Muroi, Akihiro Otsuka, Gunzi Saito, Masahide Takahashi, and Toshinobu Yoko,1-ethyl-3-methylimidazolium Based Ionic Liquids Containing Cyano Groups: Synthesis, Characterization, and Crystal Structure, Inorg. Chem., 43 (2004) 1458-1462.	101.325	295.15	1.23045	2.00669	63.0862	1.42845	16.0918
112	training	1-ethyl-3-methylimidazolium dicyanoamide	Yukihiro Yoshida, Koji Muroi, Akihiro Otsuka, et al. 1-ethyl-3-methylimidazolium based ionic liquids containing cyano groups: Synthesis, characterization, and crystal structure. Inorg. Chem. 2004. 43, 1458- 1462.	101.325	295.15	1.23045	2.00669	63.0862	1.42845	16.0918
113	test set	1-ethyl-3-methyl imidazolium ethylsulfate	H. Rodriguez, J. F. Brennecke, J. Chem. Eng. Data, 2006, 51, 2145-2155.	101.325	348.15	1.23045	1.38012	12.1641	1.23696	0.52938
114	test	1-butyl-3-methylimidazolium bis(trifluoromethylsulfonyl)imide	O.O. Okoturo, T.J. VanderNoot, Temperature dependence of viscosity for room temperature ionic liquids, Journal of Electroanalytical Chemistry, 568 (2004) 167–181	101.325	333.15	1.23045	1.32703	7.84891	1.21866	-0.95833
115	test	1-ethyl-3-methylimidazolium dicyanamide	Y.Yoshida, J.Fujii, K.Muroi, Highly conducting ionic liquids based on 1-ethyl-3-methylimidazolium cation, Synthetic Metals, 153 (2005) 421-424.	101.325	295.15	1.23045	2.00669	63.0862	1.42845	16.0918
116	training set	1-ethyl-3-methylimidazolium hexafluorophosphate	K. R. Seddon, A. S. Stark, M.J. Torres, M. Abraham, L. Moens, Eds., ACS Symposium Series 819, American Chemical Society: Washington DC, 2002, 34-49.	101.325	353.1	1.233	1.43894	16.702	1.37939	11.8723
117	training set	1-butyl-3-methylimidazolium iodide	M. H. Ghatee, M. Zare, F. Moosavi and A. R. Zolghadr, J. Chem. Eng. Data, 2010, 55, 3084-3088.	101.325	378.15	1.23679	1.16082	-6.14275	1.18588	-4.11661
118	training set	1-ethyl-3-methylimidazolium methylsulfate	A. J. L. Costa, J. M. S. S. Esperança, I. M. Marrucho and L. s. P. N. Rebelo, J. Chem. Eng. Data, 2011, 56, 3433-3441.	101.325	343.15	1.23805	1.45448	17.4811	1.28593	3.86761
119	training set	1-butyl-3-methylimidazolium tetrafluoroborate	K. R. Harris, M. Kanakubo and L. A. Woolf, J. Chem. Eng. Data, 2007, 52, 2425-2430.	11700	348.15	1.24055	1.31168	5.73383	1.22662	-1.12304
120	test set	1-butyl-3-methylimidazolium trifluoromethane sulfonate	K. R. Seddon, A. S. Stark, M.J. Torres, M. Abraham, L. Moens, Eds., ACS Symposium Series 819, American Chemical Society: Washington DC, 2002, 34-49.	101.325	343.15	1.24055	1.07504	-13.3419	1.35882	9.53391
121	training set	1-butyl-3-methylimidazolium trifluoroacetate	H. Tokuda, K. Hayamizu, K. Ishii, Md. A. B. H. Susan, M. Watanabe, J. Phys. Chem. B, 2004, 108, 16593-16600.	101.325	333.1	1.24304	1.36726	9.99317	1.38623	11.5191
122	training	1-hexyl-3-methylimidazolium bis(trifluoromethylsulfonyl)imide	Kenneth N. Marsh, Joan F. Brennecke, Robert D. Chirico，Michael Frenkel, Andreas Heintz, Joseph W. Magee, Cor J. Peters, Luis Paulo N. Rebelo, and Kenneth R. Seddon，Thermodynamic and thermophysical properties of the reference ionic liquid: 1-hexyl-3-methylimidazolium bis[(trifluoromethyl)sulfonyl]amide (including mixtures),Pure Appl. Chem., 2009 Vol.81 No.5 781-790.	101.325	333.15	1.25285	1.45432	16.0808	1.29778	3.58566
123	training set	1-butyl-3-methylimidazolium tetrafluoroborate	K. R. Harris, M. Kanakubo and L. A. Woolf, J. Chem. Eng. Data, 2007, 52, 2425-2430.	100	343.15	1.25527	1.35237	7.73531	1.21154	-3.48388
124	test set	1-butyl-3-methyl pyridinium bis((trifluoromethyl)sulfonyl)amide	J. M. Crosthwaite, M. J. Muldoon, J. N. K. Dixon, J. L. Anderson and J. F. Brennecke, J. Chem. Thermodyn, 2005, 37, 559-568.	101.325	333	1.25527	1.29949	3.52289	1.1845	-5.63772
125	training set	1-hexyl-3-methylimidazolium bis(trifluoromethylsulfonyl)imide	H. Tokuda, K. Hayamizu, K. Ishii, M. A. B. H. Susan and M. Watanabe, J. Phys. Chem. B, 2005, 109, 6103-6110.	101.325	333.15	1.25696	1.45432	15.7015	1.29778	3.24721
126	training set	1-ethyl-3-methylimidazolium n-butylsulfate	A. J. L. Costa, J. M. S. S. Esperança, I. M. Marrucho and L. s. P. N. Rebelo, J. Chem. Eng. Data, 2011, 56, 3433-3441.	101.325	358.15	1.25768	1.09469	-12.9594	1.3454	6.97495
127	training set	1-decyl-3-methylimidazolium bis(trifluoromethylsulfonyl)imide	A. Ahosseini and A. M. Scurto, Int. J. Thermophys, 2008, 29, 1222-1243.	100	343.15	1.25888	1.47618	17.2617	1.45055	15.2252
128	training set	Trimethyl(butyl)ammonium bis(trifluoromethylsulfonyl)imide	H. Tokuda, S. Tsuzuki, M. A. B. H. Susan, K. Hayamizu and M. Watanabe, J. Phys. Chem. B, 2006, 110, 19593-19600.	101.325	343.1	1.26007	1.12008	-11.11	1.13483	-9.93888
129	training set	1-butyl-3-methylimidazolium tetrafluoroborate	K. R. Harris, M. Kanakubo and L. A. Woolf, J. Chem. Eng. Data, 2007, 52, 2425-2430.	100	343.15	1.26482	1.35237	6.92185	1.21154	-4.21262
130	training set	1-butyl-1-methyl pyrrolidinium bis(trifluoromethylsulfonyl)imide	A. B. Pereiro, H. I. M. Veiga, J. M. S. S. Esperanca and A. Rodriguez, J. Chem. Thermodyn., 2009, 41, 1419–1423.	101.325	338.15	1.26529	1.2198	-3.59509	1.16311	-8.07542
131	training set	1-butylpyridinium tetrafluoroborate	B. Mokhtarani, A. Sharifi, H. R. Mortaheb, M. Mirzaei, M. Mafi and F. Sadeghian, J. Chem. Thermodyn, 2009, 41, 323-329.	101.325	348.15	1.266	1.28482	1.48626	1.2433	-1.79275
132	test set	1-decyl-3-methylimidazolium bis(trifluoromethylsulfonyl)imide	A. Ahosseini and A. M. Scurto, Int. J. Thermophys, 2008, 29, 1222-1243.	2950	343.15	1.26834	1.48707	17.2455	1.44828	14.1871
133	training	1-hexyl-3-methylimidazolium bis(trifluoromethylsulfonyl)imide	Kandil, M. E.; Marsh, K. N.; Goodwin, A. R. H.; Measurement of the Viscosity, Density, and Electrical Conductivity of 1-hexyl-3-methylimidazolium Bis(trifluorosulfonyl)imide at Temperatures between (288 and 433) K and Pressures below 50 Mpa; J. Chem. Eng. Data, 52 2382-2387.	101.325	333.15	1.26951	1.45432	14.5575	1.29778	2.2263
134	training set	1-ethyl-3-methylimidazolium nitrate	K. R. Seddon, A. S. Stark, M.J. Torres, M. Abraham, L. Moens, Eds., ACS Symposium Series 819, American Chemical Society: Washington DC, 2002, 34-49.	101.325	333.15	1.27184	1.75278	37.8147	1.39519	9.69835
135	training set	1-ethyl-3-methyl imidazolium ethylsulfate	E. Go´mez, B. Gonza´lez, N. Calvar, E. Tojo, A. Domı´nguez, J. Chem. Eng. Data, 2006, 51, 2096-2102	101.325	343.15	1.27238	1.46512	15.1482	1.28736	1.17701
136	training set	1-decyl-3-methylimidazolium bis(trifluoromethylsulfonyl)imide	A. Ahosseini and A. M. Scurto, Int. J. Thermophys, 2008, 29, 1222-1243.	4270	343.15	1.273	1.49211	17.2124	1.44804	13.75
137	training set	1-butyl-3-methyl imidazolium bis(pentafluoroethylsulfonyl)imide	H. Tokuda, S. Tsuzuki, M. A. B. H. Susan, K. Hayamizu and M. Watanabe, J. Phys. Chem. B, 2006, 110, 19593-19600.	101.325	343.1	1.27416	1.07284	-15.8002	1.28508	0.85692
138	test set	1-hexyl-3-methylimidazolium bis(trifluoromethylsulfonyl)imide	H. Tokuda, S. Tsuzuki, M. A. B. H. Susan, K. Hayamizu and M. Watanabe, J. Phys. Chem. B, 2006, 110, 19593-19600.	101.325	333.1	1.27416	1.45517	14.2064	1.29804	1.87449
139	training	1-ethyl-3-methylimidazolium tetrafluoroborate	Zhang, S.; Li, X.; Chen, H.; Wang, J.; Zhang, J.; Zhang, M.; Determination of Physical Properties for the Binary System of 1-ethyl-3-methylimidazolium tetrafluoroborate + H2O; J. Chem. Eng. Data, 49 760-764.	101.325	318.15	1.27503	1.62964	27.8116	1.29919	1.8945
140	training set	1-butyl-3-methylimidazolium nitrate	K. R. Seddon, A. S. Stark, M.J. Torres, M. Abraham, L. Moens, Eds., ACS Symposium Series 819, American Chemical Society: Washington DC, 2002, 34-49.	101.325	353.15	1.27646	1.56051	22.2533	1.29279	1.27936
141	training set	1-ethyl-3-methylimidazolium bis(trifluoromethylsulfonyl)imide	J. M. Crosthwaite, M. J. Muldoon, J. N. K. Dixon, J. L. Anderson and J. F. Brennecke, J. Chem. Thermodyn, 2005, 37, 559-568.	101.325	313	1.27875	1.52184	19.0103	1.40183	9.62513
142	training set	1-hexyl-3-methylimidazolium bis(trifluoromethylsulfonyl)imide	J. M. Crosthwaite, M. J. Muldoon, J. N. K. Dixon, J. L. Anderson and J. F. Brennecke, J. Chem. Thermodyn, 2005, 37, 559-568.	101.325	333	1.27875	1.45687	13.9294	1.29859	1.55115
143	training set	1-octyl-3-methylpyridinium bis(trifluoromethylsulfonyl)imide	J. M. Crosthwaite, M. J. Muldoon, J. N. K. Dixon, J. L. Anderson and J. F. Brennecke, J. Chem. Thermodyn, 2005, 37, 559-568.	101.325	343	1.27875	1.36535	6.77237	1.31402	2.75841
144	training	1-butyl-3-methylimidazolium trifluoromethanesulfonate	O.O. Okoturo, T.J. VanderNoot, Temperature dependence of viscosity for room temperature ionic liquids, Journal of Electroanalytical Chemistry, 568 (2004) 167–181	101.325	343.15	1.27875	1.07504	-15.9309	1.35882	6.26151
145	test set	1-butyl-3-methylimidazolium trifluoroacetate	J. M. Crosthwaite, M. J. Muldoon, J. N. K. Dixon, J. L. Anderson and J. F. Brennecke, J. Chem. Thermodyn, 2005, 37, 559-568.	101.325	333	1.27875	1.36896	7.05447	1.38756	8.50902
146	training set	1-ethyl-3-methylimidazolium tetrafluoroborate	E. Rilo, J. Vila, J. Pico, S. Garcia-Garabal, L. Segade, L. M. Varela and O. Cabeza, J. Chem. Eng. Data, 55, 639-644.	101.325	318.15	1.28253	1.62964	27.0646	1.29919	1.29902
147	training	1-hexyl-3-methylimidazolium bis(trifluoromethylsulfonyl)imide	Jason A. Widegren and Joseph W. Magee, Density, Viscosity, Speed of Sound, and Electrolytic Conductivity for the Ionic Liquid 1-hexyl-3-methylimidazolium Bis(trifluoromethylsulfonyl)imide and Its Mixtures with Water, J. Chem. Eng. Data, 52 (2007) 2331-2338.	101.325	333.15	1.28375	1.45432	13.2867	1.29778	1.09232
148	training set	1-decyl-3-methylimidazolium bis(trifluoromethylsulfonyl)imide	A. Ahosseini and A. M. Scurto, Int. J. Thermophys, 2008, 29, 1222-1243.	6900	343.15	1.28556	1.50216	16.8487	1.44904	12.7164
149	training set	1-hexyl-3-methylimidazolium iodide	M. H. Ghatee, M. Zare, F. Moosavi and A. R. Zolghadr, J. Chem. Eng. Data, 2010, 55, 3084-3088.	101.325	388.15	1.28668	1.11811	-13.1009	1.31679	2.33992
150	test set	1-ethyl-3-methylimidazolium bis(trifluoromethylsulfonyl)imide	H. Tokuda, K. Hayamizu, K. Ishii, M. A. B. H. Susan and M. Watanabe, J. Phys. Chem. B, 2005, 109, 6103-6110.	101.325	313.15	1.28758	1.51929	17.9961	1.39755	8.5405
151	training set	1-butyl-3-methylimidazolium tetrafluoroborate	K. R. Harris, M. Kanakubo and L. A. Woolf, J. Chem. Eng. Data, 2007, 52, 2425-2430.	25200	348.15	1.2878	1.36325	5.85891	1.29041	0.20279
152	training	1-ethyl-3-methylimidazolium bis(trifluoromethylsulfonyl)imide	Andreas P. Froba, Heiko Kremer, and Alfred Leipertz, Density, Refractive Index, Interfacial Tension, and Viscosity of Ionic Liquids [EMIM][EtSO4], [EMIM][NTf2], [EMIM][N(CN)2], and [OMA][NTf2] in Dependence on Temperature at Atmospheric Pressure, J. Phys. Chem. B, 112 (2008) 12420-12430.	101.325	313.15	1.2878	1.51929	17.9758	1.39755	8.52181
153	test set	1-butyl-3-methylimidazolium iodide	M. H. Ghatee, M. Zare, F. Moosavi and A. R. Zolghadr, J. Chem. Eng. Data, 2010, 55, 3084-3088.	101.325	373.15	1.28937	1.24582	-3.37785	1.18133	-8.37898
154	training	1-hexyl-3-methylimidazolium bis(trifluoromethylsulfonyl)imide	Kandil, M. E.; Marsh, K. N.; Goodwin, A. R. H.; Measurement of the Viscosity, Density, and Electrical Conductivity of 1-hexyl-3-methylimidazolium Bis(trifluorosulfonyl)imide at Temperatures between (288 and 433) K and Pressures below 50 Mpa; J. Chem. Eng. Data, 52 2382-2387.	101.325	333.15	1.29003	1.45432	12.7351	1.29778	0.6001
155	test set	1-ethyl-3-methylimidazolium trifluromethane sulfonate	K. R. Seddon, A. S. Stark, M.J. Torres, M. Abraham, L. Moens, Eds., ACS Symposium Series 819, American Chemical Society: Washington DC, 2002, 34-49.	101.325	323.15	1.29003	1.26731	-1.76158	1.47412	14.2699
156	training set	1-butyl-3-methylimidazolium bis(trifluoromethylsulfonyl)imide	H. Tokuda, K. Hayamizu, K. Ishii, M. A. B. H. Susan and M. Watanabe, J. Phys. Chem. B, 2005, 109, 6103-6110.	101.325	323.15	1.29403	1.49703	15.6871	1.36518	5.49848
157	training set	1-ethyl-3-methylimidazolium methylsulfate	A. J. L. Costa, J. M. S. S. Esperança, I. M. Marrucho and L. s. P. N. Rebelo, J. Chem. Eng. Data, 2011, 56, 3433-3441.	101.325	338.15	1.29447	1.53948	18.9271	1.34665	4.03063
158	training set	1-butyl-3-methyl imidazolium octylsulfate	J. Jacquemin, P. Husson, V. Majer, A. A. H. Padua and M. F. C. Gomes, Green Chem., 2008, 10, 944-950.	101.325	384.11	1.29667	0.5629	-56.5886	1.36063	4.93277
159	training	1-ethyl-3-methylimidazolium dicyanamide	Ming-Jay Deng, Po-Yu Chen, Tin-Iao Leong , I-Wen Sun,Jeng-Kuei Chang, Wen-Ta Tsai, Dicyanamide anion based ionic liquids for electrodeposition of metals, Electrochemistry Communications, 10 (2008) 213-216.	101.325	301	1.29667	1.90724	47.0883	1.29925	0.19933
160	training	1-ethyl-3-methylimidazolium dicyanoamide	Deng M J, Chen P Y, Leong T I, et al. Dicyanamide anion based ionic liquids for electrodeposition of metals. Electrochem. Commun. 2008. 10, 213-216.	101.325	301	1.29667	1.90724	47.0883	1.29925	0.19933
161	test	1-ethyl-3-methylimidazolium dicyanamide	Ming-Jay Deng, Po-Yu Chen, Tin-Iao Leong , I-Wen Sun,Jeng-Kuei Chang, Wen-Ta Tsai, Dicyanamide anion based ionic liquids for electrodeposition of metals, Electrochemistry Communications, 10 (2008) 213-216.	101.325	301	1.29667	1.90724	47.0883	1.29925	0.19933
162	training set	1-butyl-3-methylimidazolium bis(trifluoromethylsulfonyl)imide	K. R. Harris, M. Kanakubo, L. A. Bis(trifluoromethylsulfonyl)imide. Woolf, J. Chem. Eng. Data, 2007, 52, 1080-1085.	75600	348.15	1.29885	1.36043	4.74117	1.51084	16.3213
163	training	1-butyl-3-methylimidazolium bis(trifluoromethylsulfonyl)imide	Ramesh L. Gardas, Joao A.P. Coutinho, A group contribution method for viscosity estimation of ionic liquids, Fluid Phase Equilibria, 266 (2008) 195-201.	101.325	323.15	1.30535	1.49703	14.6837	1.36518	4.58348
164	training set	1-butyl-3-methylimidazolium tetrafluoroborate	K. R. Seddon, A. S. Stark, M.J. Torres, M. Abraham, L. Moens, Eds., ACS Symposium Series 819, American Chemical Society: Washington DC, 2002, 34-49.	101.325	343.15	1.30963	1.35237	3.26383	1.21154	-7.49023
165	training set	1-octyl-3-methylimidazolium tetrafluoroborate	K. R. Seddon, A. S. Stark, M.J. Torres, M. Abraham, L. Moens, Eds., ACS Symposium Series 819, American Chemical Society: Washington DC, 2002, 34-49.	101.325	363.1	1.31175	1.24072	-5.4149	1.52322	16.1209
166	test set	1-butyl-3-methylimidazolium bis(trifluoromethylsulfonyl)imide	K. R. Harris, M. Kanakubo, L. A. Bis(trifluoromethylsulfonyl)imide. Woolf, J. Chem. Eng. Data, 2007, 52, 1080-1085.	100	323.15	1.31175	1.49702	14.1239	1.36518	4.07343
167	test set	1-butyl-3-methylimidazolium bis(trifluoromethylsulfonyl)imide	K. R. Harris, M. Kanakubo, L. A. Bis(trifluoromethylsulfonyl)imide. Woolf, J. Chem. Eng. Data, 2007, 52, 1080-1085.	100	323.15	1.31175	1.49702	14.1239	1.36518	4.07343
168	training set	1-butyl-3-methylimidazolium bis(trifluoromethylsulfonyl)imide	K. R. Harris, M. Kanakubo, L. A. Bis(trifluoromethylsulfonyl)imide. Woolf, J. Chem. Eng. Data, 2007, 52, 1080-1085.	100	323.15	1.31387	1.49702	13.9398	1.36518	3.90551
169	training set	1-butyl-3-methylimidazolium bis(trifluoromethylsulfonyl)imide	K. R. Harris, M. Kanakubo, L. A. Bis(trifluoromethylsulfonyl)imide. Woolf, J. Chem. Eng. Data, 2007, 52, 1080-1085.	100	323.15	1.31387	1.49702	13.9398	1.36518	3.90551
170	training set	1-ethyl-3-methylimidazolium n-butylsulfate	A. J. L. Costa, J. M. S. S. Esperança, I. M. Marrucho and L. s. P. N. Rebelo, J. Chem. Eng. Data, 2011, 56, 3433-3441.	101.325	353.15	1.31597	1.17969	-10.3557	1.36943	4.06259
171	test set	1-butyl-3-methyl-imidazolium bis(trifluoromethylsulfonyl)imide	K. R. Harris, M. Kanakubo, L. A. Bis(trifluoromethylsulfonyl)imide. Woolf, J. Chem. Eng. Data, 2007, 52, 1080-1085.	100	323.15	1.31597	1.49702	13.758	1.36518	3.7397
172	training set	1-butyl-1-methyl pyrrolidinium bis(trifluoromethylsulfonyl)imide	H. Tokuda, S. Tsuzuki, M. A. B. H. Susan, K. Hayamizu and M. Watanabe, J. Phys. Chem. B, 2006, 110, 19593-19600.	101.325	333.1	1.32015	1.30565	-1.09823	1.19365	-9.58252
173	training	Tri-ethylsulfonium dicyanoamide	Gerhard D, Alpaslan S C, Gores H J, et al. Trialkylsulfonium dicyanamides - a new family of ionic liquids with very low viscosities. Chem. Commun. 2005. 40, 5080-5082.	101.325	293.15	1.32015	2.0276	53.5887	1.46094	10.6648
174	training set	1-hexyl-3-methylimidazolium tetrafluoroborate	A. Muhammad, M. I. Abdul Mutalib, C. D. Wilfred, T. Murugesan and A. Shafeeq, J. Chem. Thermodyn., 2008, 40, 1433–1438.	101.325	338.2	1.32222	1.56382	18.2723	1.48157	12.0517
175	training set	1-hexyl pyridinium bis((trifluoromethyl)sulfonyl)amide	J. M. Crosthwaite, M. J. Muldoon, J. N. K. Dixon, J. L. Anderson and J. F. Brennecke, J. Chem. Thermodyn, 2005, 37, 559-568.	101.325	333	1.32222	1.42424	7.71609	1.28642	-2.7074
176	training set	1-ethyl-3-methylimidazolium trifluoromethylsulfonate	H. Rodriguez, J. F. Brennecke, J. Chem. Eng. Data, 2006, 51, 2145-2155.	101.325	318.15	1.32222	1.35231	2.27534	1.53413	16.027
177	training	1-ethyl-3-methylimidazolium dicyanamide	Douglas R. MacFarlane, Jake Golding, Stewart Forsyth, Maria Forsyth and Glen B. Deacon, Low viscosity ionic liquids based on organic salts of the dicyanamide anion, Chem. Commun., 2001 1430-1431.	101.325	298.15	1.32222	1.95569	47.9099	1.35577	2.53732
178	training	1-ethyl-3-methylimidazolium dicyanamide	Hélène Olivier-Bourbigou, Lionel Magna, Ionic liquids: perspectives for organic and catalytic reactions, Journal of Molecular Catalysis A: Chemical, 182 (2002) 419-437	101.325	298.15	1.32222	1.95569	47.9099	1.35577	2.53732
179	training	1-ethyl-3-methylimidazolium dicyanoamide	MacFarlane D R, Golding J, Forsyth S, et al. Low viscosity ionic liquids based on organic salts of the dicyanamide anion. Chem. Commun. 2001. 1430-1431.	101.325	298.15	1.32222	1.95569	47.9099	1.35577	2.53732
180	test set	1-ethyl-3-methylimidazolium ethylsulfate	H. Rodriguez, J. F. Brennecke, J. Chem. Eng. Data, 2006, 51, 2145-2155.	101.325	338.15	1.32222	1.55012	17.2364	1.35068	2.15229
181	training set	1,3-dimethylimidazolium methylsulfate	A. B. Pereiro, F. Santamarta, E. Tojo, A. Rodrı´guez, J. Tojo, J. Chem. Eng. Data, 2006, 51, 952-954	101.325	333.15	1.32243	1.62061	22.548	1.42047	7.41328
182	training	1-ethyl-3-methylimidazolium ethylsulfate	Ergun Altin, Johannes Gradl, Wolfgang Peukert, First Studies on the Rheological Behavior of Suspensions in Ionic Liquids, Chem. Eng. Technol., 29 (2006) No.11 1347-1354.	101.325	333.15	1.32634	1.66604	25.612	1.3635	2.80229
183	training set	1-butyl-1-methyl pyrrolidinium bis(trifluoromethylsulfonyl)imide	A. B. Pereiro, H. I. M. Veiga, J. M. S. S. Esperanca and A. Rodriguez, J. Chem. Thermodyn., 2009, 41, 1419–1423.	101.325	333.15	1.32695	1.3048	-1.66911	1.19322	-10.0783
184	training set	1-ethyl-3-methylimidazolium ethylsulfate	E. Go´mez, B. Gonza´lez, N. Calvar, E. Tojo, A. Domı´nguez, J. Chem. Eng. Data, 2006, 51, 2096-2102	101.325	338.15	1.33135	1.55012	16.4324	1.35068	1.45176
185	training set	1-butyl-3-methylimidazolium iodide	M. H. Ghatee, M. Zare, F. Moosavi and A. R. Zolghadr, J. Chem. Eng. Data, 2010, 55, 3084-3088.	101.325	368.15	1.33143	1.33082	-0.04604	1.21283	-8.90763
186	training	1-butyl-3-methylimidazolium tetrafluoroborate	Zhou, Q.; Wang, L.-S.; Densities and Viscosities of 1-butyl-3-methylimidazolium tetrafluoroborate + H2O Binary Mixtures from (303.15 to 353.15) K; J. Chem. Eng. Data, 51 905-908.	101.325	333.15	1.33284	1.52237	14.2201	1.27969	-3.98752
187	training	1-ethyl-3-methylimidazolium tetrafluoroborate	Zhang, S.; Li, X.; Chen, H.; Wang, J.; Zhang, J.; Zhang, M.; Determination of Physical Properties for the Binary System of 1-ethyl-3-methylimidazolium tetrafluoroborate + H2O; J. Chem. Eng. Data, 49 760-764.	101.325	313.15	1.33319	1.71464	28.6124	1.47884	10.9252
188	test set	1-octyl-3-methylimidazolium tetrafluoroborate	B. Mokhtarani, M. M. Mojtahedi, H. R. Mortaheb, M. Mafi, F. Yazdani and F. Sadeghian, J. Chem. Eng. Data, 2008, 53, 677-682.	101.325	363.15	1.33385	1.23987	-7.04577	1.52288	14.1714
189	training set	1-butyl-3-methylimidazolium trifluoromethylsulfonate	M. L. Ge, R. S. Zhao, Y. F. Yi, Q. Zhang and L. S. Wang, J. Chem. Eng. Data, 2008, 53, 2408-2411.	101.325	333.15	1.33463	1.24504	-6.71294	1.51732	13.6888
190	test set	1,3-dimethylimidazolium bis(trifluoromethylsulfonyl)imide	H. Tokuda, S. Tsuzuki, M. A. B. H. Susan, K. Hayamizu and M. Watanabe, J. Phys. Chem. B, 2006, 110, 19593-19600.	101.325	313.1	1.34044	1.51628	13.1181	1.38661	3.44461
191	training set	1-hexyl-2,3-dimethylimidazolium bis(trifluoromethylsulfonyl)imide	J. M. Crosthwaite, M. J. Muldoon, J. N. K. Dixon, J. L. Anderson and J. F. Brennecke, J. Chem. Thermodyn, 2005, 37, 559-568.	101.325	343	1.34242	1.30769	-2.58699	1.27419	-5.08272
192	training	1-butyl-3-methylimidazolium bis(trifluoromethylsulfonyl)imide	McFarlane, J.; Ridenour, W. B.; Luo, H.; Hunt, R. D.; DePaoli, D. W.; Room Temperature Ionic Liquids for Separating Organics from Produced Water ; Sep. Sci. Technol., 40 (6) 1245-1265.	101.325	323.1	1.34242	1.49788	11.58	1.36624	1.77404
193	test	1-butyl-3-methylimidazolium bis(trifluoromethylsulfonyl)imide	O.O. Okoturo, T.J. VanderNoot, Temperature dependence of viscosity for room temperature ionic liquids, Journal of Electroanalytical Chemistry, 568 (2004) 167–181	101.325	323.15	1.34242	1.49703	11.5167	1.36518	1.69539
194	training set	1-hexyl-3-methylimidazolium iodide	M. H. Ghatee, M. Zare, F. Moosavi and A. R. Zolghadr, J. Chem. Eng. Data, 2010, 55, 3084-3088.	101.325	383.15	1.34459	1.20311	-10.5219	1.26644	-5.81195
195	training set	1-butyl-3-methylimidazolium nitrate	B. Mokhtarani, A. Sharifi, H. R. Mortaheb, M. Mirzaei, M. Mafi and F. Sadeghian, J. Chem. Thermodyn, 2009, 41, 1432-1438.	101.325	343.15	1.34537	1.73051	28.6274	1.32826	-1.27166
196	training set	1-butylpyridinium tetrafluoroborate	B. Mokhtarani, A. Sharifi, H. R. Mortaheb, M. Mirzaei, M. Mafi and F. Sadeghian, J. Chem. Thermodyn, 2009, 41, 323-329.	101.325	343.15	1.34577	1.36982	1.78679	1.23973	-7.87981
197	training set	1-butyl-3-methylimidazolium trifluoromethylsulfonate	H. Tokuda, S. Tsuzuki, M. A. B. H. Susan, K. Hayamizu and M. Watanabe, J. Phys. Chem. B, 2006, 110, 19593-19600.	101.325	333.1	1.3483	1.24589	-7.59571	1.51816	12.5981
198	training set	1,3-dimethylimidazolium bis(trifluoromethylsulfonyl)imide	H. Tokuda, K. Hayamizu, K. Ishii, M. A. B. H. Susan and M. Watanabe, J. Phys. Chem. B, 2005, 109, 6103-6110.	101.325	313.15	1.34869	1.51543	12.3631	1.38519	2.70623
199	training set	1-octyl-3-methylimidazolium bis(trifluoromethylsulfonyl)amide	H. Tokuda, K. Hayamizu, K. Ishii, M. A. B. H. Susan and M. Watanabe, J. Phys. Chem. B, 2005, 109, 6103-6110.	101.325	333.15	1.35102	1.55452	15.0628	1.33162	-1.43579
200	training set	1-hexyl-3-methylimidazolium tetrafluoroborate	K. R. Seddon, A. S. Stark, M.J. Torres, M. Abraham, L. Moens, Eds., ACS Symposium Series 819, American Chemical Society: Washington DC, 2002, 34-49.	101.325	353.15	1.35411	1.30967	-3.28186	1.41274	4.33009
201	training set	1-ethyl-3-methylimidazolium methylsulfate	A. J. L. Costa, J. M. S. S. Esperança, I. M. Marrucho and L. s. P. N. Rebelo, J. Chem. Eng. Data, 2011, 56, 3433-3441.	101.325	333.15	1.35411	1.62448	19.9663	1.41612	4.57933
202	training set	1-butylpyridinium bis(trifluoromethylsulfonyl)imide	H. Tokuda, S. Tsuzuki, M. A. B. H. Susan, K. Hayamizu and M. Watanabe, J. Phys. Chem. B, 2006, 110, 19593-19600.	101.325	323.1	1.35603	1.51532	11.7466	1.37773	1.60027
203	training set	1-octyl-3-methylimidazolium bis(trifluoromethylsulfonyl)amide	H. Tokuda, S. Tsuzuki, M. A. B. H. Susan, K. Hayamizu and M. Watanabe, J. Phys. Chem. B, 2006, 110, 19593-19600.	101.325	333.1	1.35603	1.55537	14.7004	1.33165	-1.79792
204	training set	1-butyl-3-methylimidazolium trifluoromethylsulfonate	K. R. Seddon, A. S. Stark, M.J. Torres, M. Abraham, L. Moens, Eds., ACS Symposium Series 819, American Chemical Society: Washington DC, 2002, 34-49.	101.325	333.15	1.35793	1.24504	-8.31361	1.51732	11.7381
205	test	1-ethyl-3-methylimidazolium dicyanamide	Andreas P. Froba, Heiko Kremer, and Alfred Leipertz, Density, Refractive Index, Interfacial Tension, and Viscosity of Ionic Liquids [EMIM][EtSO4], [EMIM][NTf2], [EMIM][N(CN)2], and [OMA][NTf2] in Dependence on Temperature at Atmospheric Pressure, J. Phys. Chem. B, 112 (2008) 12420-12430.	101.325	293.15	1.35793	2.04069	50.2792	1.48164	9.10991
206	test	Methyldiethylsulfonium dicyanoamide	Gerhard D, Alpaslan S C, Gores H J, et al. Trialkylsulfonium dicyanamides - a new family of ionic liquids with very low viscosities. Chem. Commun. 2005. 40, 5080-5082.	101.325	293.15	1.35984	2.02799	49.135	1.46152	7.47803
207	training set	1-ethyl-3-methylpyridinium ethylsulfate	J. M. Crosthwaite, M. J. Muldoon, J. N. K. Dixon, J. L. Anderson and J. F. Brennecke, J. Chem. Thermodyn, 2005, 37, 559-568.	101.325	343	1.36173	1.45143	6.58685	1.30519	-4.15238
208	training set	1-butyl-3-methylimidazolium nitrate	K. R. Seddon, A. S. Stark, M.J. Torres, M. Abraham, L. Moens, Eds., ACS Symposium Series 819, American Chemical Society: Washington DC, 2002, 34-49.	101.325	363.15	1.36173	1.51781	11.4619	1.57408	15.5942
209	training set	1-butyl-3-methyl imidazolium octylsulfate	P. Wasserscheid, R. van Hal and A. Bosmann, Green Chem., 2002, 4, 400-404.	101.325	373.15	1.36736	0.74922	-45.2066	1.4507	6.0949
210	test set	1-butyl-3-methylimidazolium tetrafluoroborate	K. R. Harris, M. Kanakubo and L. A. Woolf, J. Chem. Eng. Data, 2007, 52, 2425-2430.	50700	348.15	1.36736	1.46066	6.82344	1.48658	8.71878
211	training set	1-ethyl-3-methylimidazolium hexafluorophosphate	K. R. Seddon, A. S. Stark, M.J. Torres, M. Abraham, L. Moens, Eds., ACS Symposium Series 819, American Chemical Society: Washington DC, 2002, 34-49.	101.325	343.1	1.36922	1.60894	17.5074	1.57989	15.3861
212	training set	1-ethyl-3-methylimidazolium n-octylsulfate	B. Hasse, J. Lehmann, D. Assenbaum, P. Wasserscheid, A. Leipertz and A. P. Fröba, J. Chem. Eng. Data ,2009, 54, 2576-2583.	101.325	373.15	1.37107	0.60149	-56.1298	1.54819	12.9181
213	training set	1-butyl-3-methylimidazolium tetrafluoroborate	D.Tomida, A.Kumagai, K.Qiao, C.Yokoyama, Int. J. Thermophys, 2006, 27, 39-47.	100	333.15	1.37475	1.52237	10.7379	1.2797	-6.91424
214	training set	1-butyl-3-methylimidazolium methylsulfate	A. Ferna´ndez, J. Garcı´a, J. S. Torrecilla,*M. Oliet, F. Rodrı´guez, J. Chem. Eng. Data, 2008, 53, 1518–1522	101.325	353.15	1.37475	1.43221	4.17946	1.27863	-6.99211
215	training set	1-ethyl-3-methylimidazolium n-butylsulfate	A. J. L. Costa, J. M. S. S. Esperança, I. M. Marrucho and L. s. P. N. Rebelo, J. Chem. Eng. Data, 2011, 56, 3433-3441.	101.325	348.15	1.37658	1.26469	-8.12796	1.40609	2.14388
216	training set	1-butyl-3-methyl pyridinium bis((trifluoromethyl)sulfonyl)amide	J. M. Crosthwaite, M. J. Muldoon, J. N. K. Dixon, J. L. Anderson and J. F. Brennecke, J. Chem. Thermodyn, 2005, 37, 559-568.	101.325	323	1.38021	1.46949	6.46871	1.34189	-2.77605
217	training set	1-hexyl-3-methylimidazolium bis(trifluoromethylsulfonyl)imide	A. Muhammad, M. I. Abdul Mutalib, C. D. Wilfred, T. Murugesan and A. Shafeeq, J. Chem. Thermodyn., 2008, 40, 1433–1438.	101.325	328.2	1.38021	1.53847	11.4665	1.3359	-3.21066
218	test	1-butyl-3-methylimidazolium tetrafluoroborate	O.O. Okoturo, T.J. VanderNoot, Temperature dependence of viscosity for room temperature ionic liquids, Journal of Electroanalytical Chemistry, 568 (2004) 167–181	101.325	343.15	1.38021	1.35237	-2.01688	1.21154	-12.221
219	training set	1-butyl-3-methyl-imidazolium bis(trifluoromethylsulfonyl)imide	K. R. Harris, M. Kanakubo, L. A. Bis(trifluoromethylsulfonyl)imide. Woolf, J. Chem. Eng. Data, 2007, 52, 1080-1085.	100900	348.15	1.38382	1.45708	5.2938	1.596	15.3327
220	training set	1-butyl-3-methylimidazolium thiocyanate	U. Domańska and M. Laskowska, J. Chem. Eng. Data, 2009, 54, 2113-2119.	101.325	318.15	1.38382	2.03269	46.8898	1.50213	8.54955
221	training set	Trimethyl(butyl)ammonium bis(trifluoromethylsulfonyl)imide	H. Tokuda, S. Tsuzuki, M. A. B. H. Susan, K. Hayamizu and M. Watanabe, J. Phys. Chem. B, 2006, 110, 19593-19600.	101.325	333.1	1.38561	1.29008	-6.89474	1.17327	-15.3244
222	training	1-hexyl-3-methylimidazolium bis(trifluoromethylsulfonyl)imide	Kenneth N. Marsh, Joan F. Brennecke, Robert D. Chirico，Michael Frenkel, Andreas Heintz, Joseph W. Magee, Cor J. Peters, Luis Paulo N. Rebelo, and Kenneth R. Seddon，Thermodynamic and thermophysical properties of the reference ionic liquid: 1-hexyl-3-methylimidazolium bis[(trifluoromethyl)sulfonyl]amide (including mixtures),Pure Appl. Chem., 2009 Vol.81 No.5 781-790.	101.325	323.15	1.38561	1.62432	17.2282	1.4082	1.63031
223	training set	1-butyl-3-methylimidazolium tetrafluoroborate	D.Tomida, A.Kumagai, K.Qiao, C.Yokoyama, Int. J. Thermophys, 2006, 27, 39-47.	5000	333.15	1.38917	1.54109	10.9358	1.27839	-7.97479
224	training set	1-butyl-1-methyl pyrrolidinium bis(trifluoromethylsulfonyl)imide	A. B. Pereiro, H. I. M. Veiga, J. M. S. S. Esperanca and A. Rodriguez, J. Chem. Thermodyn., 2009, 41, 1419–1423.	101.325	328.15	1.39235	1.3898	-0.18302	1.25239	-10.0517
225	training set	1-hexyl-3-methylimidazolium bis(trifluoromethylsulfonyl)imide	H. Tokuda, K. Hayamizu, K. Ishii, M. A. B. H. Susan and M. Watanabe, J. Phys. Chem. B, 2005, 109, 6103-6110.	101.325	323.15	1.39375	1.62432	16.5433	1.4082	1.03648
226	training set	1-butyl-3-methylimidazolium iodide	M. H. Ghatee, M. Zare, F. Moosavi and A. R. Zolghadr, J. Chem. Eng. Data, 2010, 55, 3084-3088.	101.325	363.15	1.39602	1.41582	1.41811	1.27387	-8.75011
227	training set	1-butyl-3-methylimidazolium trifluoroacetate	H. Tokuda, K. Hayamizu, K. Ishii, Md. A. B. H. Susan, M. Watanabe, J. Phys. Chem. B, 2004, 108, 16593-16600.	101.325	323.1	1.3962	1.53726	10.1031	1.56316	11.9581
228	test set	1-ethyl-3-methylimidazolium ethylsulfate	E. Go´mez, B. Gonza´lez, N. Calvar, E. Tojo, A. Domı´nguez, J. Chem. Eng. Data, 2006, 51, 2096-2102	101.325	333.15	1.39716	1.63512	17.0319	1.42351	1.88607
229	training	1-butyl-3-methylimidazolium trifluoromethanesulfonate	O.O. Okoturo, T.J. VanderNoot, Temperature dependence of viscosity for room temperature ionic liquids, Journal of Electroanalytical Chemistry, 568 (2004) 167–181	101.325	333.15	1.39794	1.24504	-10.9377	1.51732	8.54005
230	training set	1-butyl-3-methylimidazolium tetrafluoroborate	K. R. Harris, M. Kanakubo and L. A. Woolf, J. Chem. Eng. Data, 2007, 52, 2425-2430.	100	333.15	1.4014	1.52237	8.63201	1.2797	-8.68442
231	training	1-ethyl-3-methylimidazolium ethylsulfate	Andreas P. Froba, Heiko Kremer, and Alfred Leipertz, Density, Refractive Index, Interfacial Tension, and Viscosity of Ionic Liquids [EMIM][EtSO4], [EMIM][NTf2], [EMIM][N(CN)2], and [OMA][NTf2] in Dependence on Temperature at Atmospheric Pressure, J. Phys. Chem. B, 112 (2008) 12420-12430.	101.325	333.15	1.4014	1.66604	18.8837	1.3635	-2.70421
232	test set	1,3-dimethylimidazolium methylsulfate	E. Gomez, B. Gonzalez, N. Calvar and A. Dominguez, J. Chem. Thermodyn, 2008, 40, 1208-1216.	101.325	328.15	1.40157	1.70561	21.6929	1.49858	6.92161
233	training	Ethyldimethylsulfonium dicyanoamide	Gerhard D, Alpaslan S C, Gores H J, et al. Trialkylsulfonium dicyanamides - a new family of ionic liquids with very low viscosities. Chem. Commun. 2005. 40, 5080-5082.	101.325	293.15	1.40312	2.02761	44.5074	1.46096	4.12247
234	training set	1-hexyl-3-methylimidazolium iodide	M. H. Ghatee, M. Zare, F. Moosavi and A. R. Zolghadr, J. Chem. Eng. Data, 2010, 55, 3084-3088.	101.325	378.15	1.40432	1.28811	-8.27496	1.26533	-9.89761
235	training set	1-butyl-3-methylimidazolium tetrafluoroborate	D.Tomida, A.Kumagai, K.Qiao, C.Yokoyama, Int. J. Thermophys, 2006, 27, 39-47.	10000	333.15	1.40483	1.56019	11.0588	1.28658	-8.41715
236	training set	1-butyl-3-methylimidazolium tetrafluoroborate	K. R. Harris, M. Kanakubo and L. A. Woolf, J. Chem. Eng. Data, 2007, 52, 2425-2430.	100	333.15	1.40654	1.52237	8.23503	1.2797	-9.01812
237	training set	1-butyl-3-methylimidazolium hexafluorophosphate	K. R. Harris, L. A. Woolf and M. Kanakubo, J. Chem. Eng. Data, 2005, 50, 1777-1782.	100	353.15	1.40654	1.58581	12.7456	1.44449	2.69825
238	test set	1-butyl-3-methylimidazolium hexafluorophosphate	K. R. Harris, L. A. Woolf and M. Kanakubo, J. Chem. Eng. Data, 2005, 50, 1777-1782.	100	353.15	1.40654	1.58581	12.7456	1.44449	2.69825
239	training	1-ethyl-3-methylimidazolium tetrafluoroborate	Zhang, S.; Li, X.; Chen, H.; Wang, J.; Zhang, J.; Zhang, M.; Determination of Physical Properties for the Binary System of 1-ethyl-3-methylimidazolium tetrafluoroborate + H2O; J. Chem. Eng. Data, 49 760-764.	101.325	308.15	1.40751	1.79964	27.86	1.6188	15.0115
240	training set	1-butyl-3-methyl imidazolium bis(pentafluoroethylsulfonyl)imide	H. Tokuda, S. Tsuzuki, M. A. B. H. Susan, K. Hayamizu and M. Watanabe, J. Phys. Chem. B, 2006, 110, 19593-19600.	101.325	333.1	1.40824	1.24284	-11.7452	1.35269	-3.94487
241	test set	1-butyl-3-methylimidazolium hexafluorophosphate	D.Tomida, A.Kumagai, K.Qiao, C.Yokoyama, Int. J. Thermophys, 2006, 27, 39-47.	100	353.15	1.40993	1.58581	12.4745	1.44449	2.45133
242	training set	1-butyl-3-methylimidazolium hexafluorophosphate	W. Fan, Q. Zhou, J. Sun and S. J. Zhang, J. Chem. Eng. Data, 2009, 54, 2307-2311.	101.325	353.15	1.41087	1.58582	12.3999	1.44449	2.38304
243	training set	1-decyl-3-methylimidazolium bis(trifluoromethylsulfonyl)amide	A. Ahosseini and A. M. Scurto, Int. J. Thermophys, 2008, 29, 1222-1243.	34600	343.15	1.41095	1.60797	13.964	1.55359	10.1092
244	test set	1-hexyl-3-methylimidazolium bi(trifluoromethylsulphonyl)imide	H. Tokuda, S. Tsuzuki, M. A. B. H. Susan, K. Hayamizu and M. Watanabe, J. Phys. Chem. B, 2006, 110, 19593-19600.	101.325	323.1	1.41162	1.62517	15.1281	1.40911	-0.1778
245	training set	1-octyl-3-methylimidazolium tetrafluoroborate	B. Mokhtarani, M. M. Mojtahedi, H. R. Mortaheb, M. Mafi, F. Yazdani and F. Sadeghian, J. Chem. Eng. Data, 2008, 53, 677-682.	101.325	358.15	1.4128	1.32487	-6.22381	1.57068	11.175
246	training set	1-butyl-3-methylimidazolium nitrate	K. R. Seddon, A. S. Stark, M.J. Torres, M. Abraham, L. Moens, Eds., ACS Symposium Series 819, American Chemical Society: Washington DC, 2002, 34-49.	101.325	343.15	1.4133	1.73051	22.4449	1.32826	-6.01702
247	test set	1-butyl-3-methylimidazolium octylsulfate	J. Jacquemin, P. Husson, V. Majer, A. A. H. Padua and M. F. C. Gomes, Green Chem., 2008, 10, 944-950.	101.325	373.9	1.4133	0.73647	-47.8899	1.44156	1.99981
248	training set	1-butyl-3-methylimidazolium nitrate	B. Mokhtarani, A. Sharifi, H. R. Mortaheb, M. Mirzaei, M. Mafi and F. Sadeghian, J. Chem. Thermodyn, 2009, 41, 1432-1438.	101.325	338.15	1.41347	1.81551	28.4438	1.37499	-2.72257
249	training set	1-butyl-3-methylimidazolium trifluoroacetate	J. M. Crosthwaite, M. J. Muldoon, J. N. K. Dixon, J. L. Anderson and J. F. Brennecke, J. Chem. Thermodyn, 2005, 37, 559-568.	101.325	323	1.41497	1.53896	8.76266	1.56521	10.6178
250	training set	1-hexyl-3-methylimidazolium bis(trifluoromethylsulfonyl)imide	J. M. Crosthwaite, M. J. Muldoon, J. N. K. Dixon, J. L. Anderson and J. F. Brennecke, J. Chem. Thermodyn, 2005, 37, 559-568.	101.325	323	1.41497	1.62687	14.9757	1.41095	-0.28406
251	training set	1-ethyl-3-methylimidazolium bis(trifluoromethylsulfonyl)imide	J. M. Crosthwaite, M. J. Muldoon, J. N. K. Dixon, J. L. Anderson and J. F. Brennecke, J. Chem. Thermodyn, 2005, 37, 559-568.	101.325	303	1.41497	1.69184	19.5675	1.62648	14.948
252	test set	1-octyl-3-methylpyridinium bis(trifluoromethylsulfonyl)imide	J. M. Crosthwaite, M. J. Muldoon, J. N. K. Dixon, J. L. Anderson and J. F. Brennecke, J. Chem. Thermodyn, 2005, 37, 559-568.	101.325	333	1.41497	1.53535	8.50772	1.32313	-6.49088
253	training set	1-butylpyridinium tetrafluoroborate	B. Mokhtarani, A. Sharifi, H. R. Mortaheb, M. Mirzaei, M. Mafi and F. Sadeghian, J. Chem. Thermodyn, 2009, 41, 323-329.	101.325	338.15	1.41514	1.45482	2.80368	1.2543	-11.3653
254	test set	1-ethyl-3-methylimidazolium tetrafluoroborate	E. Rilo, J. Vila, J. Pico, S. Garcia-Garabal, L. Segade, L. M. Varela and O. Cabeza, J. Chem. Eng. Data, 55, 639-644.	101.325	308.15	1.41531	1.79964	27.1553	1.6188	14.3776
255	training set	1-ethyl-3-methylimidazolium trifluoromethylsulfonate	K. R. Seddon, A. S. Stark, M.J. Torres, M. Abraham, L. Moens, Eds., ACS Symposium Series 819, American Chemical Society: Washington DC, 2002, 34-49.	101.325	313.15	1.41664	1.43731	1.45874	1.59739	12.759
256	training set	1-ethyl-3-methylimidazolium methylsulfate	A. J. L. Costa, J. M. S. S. Esperança, I. M. Marrucho and L. s. P. N. Rebelo, J. Chem. Eng. Data, 2011, 56, 3433-3441.	101.325	328.15	1.41664	1.70948	20.6711	1.49351	5.42593
257	test set	1-ethyl-3-methylimidazolium nitrate	K. R. Seddon, A. S. Stark, M.J. Torres, M. Abraham, L. Moens, Eds., ACS Symposium Series 819, American Chemical Society: Washington DC, 2002, 34-49.	101.325	323.15	1.4183	1.92278	35.5695	1.53385	8.1473
258	training	1-hexyl-3-methylimidazolium bis(trifluoromethylsulfonyl)imide	Jason A. Widegren and Joseph W. Magee, Density, Viscosity, Speed of Sound, and Electrolytic Conductivity for the Ionic Liquid 1-hexyl-3-methylimidazolium Bis(trifluoromethylsulfonyl)imide and Its Mixtures with Water, J. Chem. Eng. Data, 52 (2007) 2331-2338.	101.325	323.15	1.41913	1.62432	14.459	1.4082	-0.77043
259	training set	1-butyl-3-methylimidazolium tetrafluoroborate	D.Tomida, A.Kumagai, K.Qiao, C.Yokoyama, Int. J. Thermophys, 2006, 27, 39-47.	15000	333.15	1.41996	1.57929	11.2205	1.30377	-8.18227
260	test set	1-ethyl-3-methylimidazolium bis(trifluoromethylsulfonyl)amide	H. Tokuda, K. Hayamizu, K. Ishii, M. A. B. H. Susan and M. Watanabe, J. Phys. Chem. B, 2005, 109, 6103-6110.	101.325	303.15	1.42667	1.68929	18.4082	1.62416	13.843
261	training set	1-hexyl-3-methylimidazolium hexafluoroborate	K. R. Seddon, A. S. Stark, M.J. Torres, M. Abraham, L. Moens, Eds., ACS Symposium Series 819, American Chemical Society: Washington DC, 2002, 34-49.	101.325	363.15	1.42813	1.54311	8.0513	1.49445	4.644
262	training set	1-butyl-3-methylimidazolium hexafluorophosphate	D.Tomida, A.Kumagai, K.Qiao, C.Yokoyama, Int. J. Thermophys, 2006, 27, 39-47.	5000	353.15	1.42975	1.60453	12.2245	1.44738	1.23323
263	test set	1-butyl-3-methylimidazolium bis(trifluoromethylsulfonyl)imide	K. R. Harris, M. Kanakubo, L. A. Bis(trifluoromethylsulfonyl)imide. Woolf, J. Chem. Eng. Data, 2007, 52, 1080-1085.	26400	323.15	1.42975	1.59749	11.7319	1.44832	1.29875
264	training set	1-octyl-3-methylpyridinium bis(trifluoromethylsulfonyl)imide	J. M. Crosthwaite, M. J. Muldoon, J. N. K. Dixon, J. L. Anderson and J. F. Brennecke, J. Chem. Thermodyn, 2005, 37, 559-568.	101.325	323	1.43136	1.70535	19.1421	1.40315	-1.97098
265	training	1-butyl-3-methylimidazolium chloride	Kuang Q L, Zhang J, Wang Z G. Revealing long-range density fluctuations in dialkylimidazolium chloride ionic liquids by dynamic light scattering. J. Phys. Chem. B. 2007. 111, 9858-9863.	101.325	394	1.43136	1.78086	24.4167	1.64244	14.7465
266	test set	1-ethyl-3-methylimidazolium n-octylsulfate	B. Hasse, J. Lehmann, D. Assenbaum, P. Wasserscheid, A. Leipertz and A. P. Fröba, J. Chem. Eng. Data ,2009, 54, 2576-2583.	101.325	368.15	1.43136	0.68649	-52.0393	1.59895	11.7081
267	test	1-butyl-3-methylimidazolium chloride	Qinglin Kuang, Jun Zhang, and Zhigang Wang, Revealing Long-Range Density Fluctuations in Dialkylimidazolium Chloride Ionic Liquids by Dynamic Light Scattering, J. Phys. Chem. B, 111 (2007) 9858-9863.	101.325	394	1.43136	1.78086	24.4167	1.64244	14.7465
268	test	1-ethyl-3-methylimidazolium bis(trifluoromethylsulfonyl)imide	Andreas P. Froba, Heiko Kremer, and Alfred Leipertz, Density, Refractive Index, Interfacial Tension, and Viscosity of Ionic Liquids [EMIM][EtSO4], [EMIM][NTf2], [EMIM][N(CN)2], and [OMA][NTf2] in Dependence on Temperature at Atmospheric Pressure, J. Phys. Chem. B, 112 (2008) 12420-12430.	101.325	303.15	1.43297	1.68929	17.8876	1.62416	13.3426
269	test set	1-butyl-3-methylimidazolium tetrafluoroborate	D.Tomida, A.Kumagai, K.Qiao, C.Yokoyama, Int. J. Thermophys, 2006, 27, 39-47.	20000	333.15	1.43457	1.59839	11.4192	1.32901	-7.35806
270	test set	1-butyl-3-methylimidazolium bis(trifluoromethylsulfonyl)imide	H. Tokuda, K. Hayamizu, K. Ishii, M. A. B. H. Susan and M. Watanabe, J. Phys. Chem. B, 2005, 109, 6103-6110.	101.325	313.15	1.43648	1.66703	16.0494	1.60726	11.8886
271	training set	1-ethyl-3-methylimidazolium n-butylsulfate	A. J. L. Costa, J. M. S. S. Esperança, I. M. Marrucho and L. s. P. N. Rebelo, J. Chem. Eng. Data, 2011, 56, 3433-3441.	101.325	343.15	1.44248	1.34969	-6.43253	1.44668	0.29146
272	training set	1,3-dimethylimidazolium methylsulfate	A. B. Pereiro, F. Santamarta, E. Tojo, A. Rodrı´guez, J. Tojo, J. Chem. Eng. Data, 2006, 51, 952-954	101.325	323.15	1.44373	1.79061	24.0267	1.58535	9.80912
273	training set	1-butyl-3-methylimidazolium tetrafluoroborate	K. R. Harris, M. Kanakubo and L. A. Woolf, J. Chem. Eng. Data, 2007, 52, 2425-2430.	75600	348.15	1.44404	1.55578	7.73794	1.64316	13.7894
274	training set	1-butyl-3-methylimidazolium tetrafluoroborate	K. R. Seddon, A. S. Stark, M.J. Torres, M. Abraham, L. Moens, Eds., ACS Symposium Series 819, American Chemical Society: Washington DC, 2002, 34-49.	101.325	333.15	1.44716	1.52237	5.19736	1.27969	-11.572
275	training	1-ethyl-3-methylimidazolium dicyanamide	Qing Dai, David B. Menzies, Douglas R. MacFarlane, Stuart R. Batten, Stewart Forsyth, Leone Spiccia, Yi-Bing Cheng, Maria Forsyth,Dye-sensitized nanocrystalline solar cells incorporating ethylmethylimidazolium-based ionic liquid electrolytes, C. R. Chimie, 9 (2006) 617-621.	101.325	298.15	1.44855	1.95569	35.0102	1.35577	-6.40526
276	training set	1-octyl-3-methyl imidazolium tetrafluoroborate	K. R. Seddon, A. S. Stark, M.J. Torres, M. Abraham, L. Moens, Eds., ACS Symposium Series 819, American Chemical Society: Washington DC, 2002, 34-49.	101.325	353.1	1.44871	1.41072	-2.62233	1.63552	12.8949
277	training set	1-octyl-3-methylimidazolium tetrafluoroborate	K. R. Harris, M. Kanakubo and L. A. Woolf, J. Chem. Eng. Data, 2006, 51, 1161-1167.	100	353.15	1.44871	1.40986	-2.68135	1.63486	12.8492
278	training set	1-butyl-3-methylimidazolium hexafluorophosphate	D.Tomida, A.Kumagai, K.Qiao, C.Yokoyama, Int. J. Thermophys, 2006, 27, 39-47.	10000	353.15	1.44871	1.62363	12.0742	1.45912	0.71873
279	training set	1-butyl-1-methyl pyrrolidinium bis(trifluoromethylsulfonyl)imide	H. Tokuda, S. Tsuzuki, M. A. B. H. Susan, K. Hayamizu and M. Watanabe, J. Phys. Chem. B, 2006, 110, 19593-19600.	101.325	323.1	1.45332	1.47565	1.5366	1.34752	-7.27978
280	training set	1-butyl-3-methylimidazolium bis(trifluoromethylsulfonyl)imide	K. R. Harris, M. Kanakubo, L. A. Bis(trifluoromethylsulfonyl)imide. Woolf, J. Chem. Eng. Data, 2007, 52, 1080-1085.	100	313.15	1.45484	1.66702	14.5845	1.60726	10.4765
281	training set	1-butyl-3-methylimidazolium bis((trifluoromethyl)sulfonyl)amide	K. R. Harris, M. Kanakubo, L. A. Bis(trifluoromethylsulfonyl)imide. Woolf, J. Chem. Eng. Data, 2007, 52, 1080-1085.	100	313.15	1.45484	1.66702	14.5845	1.60726	10.4765
282	training	1-butyl-3-methylimidazolium dicyanamide	Glen McHale, Chris Hardacre, Rile Ge, Nicola Doy, Ray W. K.Allen, Jordan M. MacInnes, Mark R.Bown, and MichaelI. Newton, Density-Viscosity Product of Small-Volume Ionic Liquid Samples Using Quartz Crystal Impedance Analysis, Anal. Chem., 80 (2008) 5806-5811.	101.325	298.15	1.45939	2.10343	44.1302	1.67138	14.5257
283	training set	1-butyl-1-methyl pyrrolidinium bis(trifluoromethylsulfonyl)imide	A. B. Pereiro, H. I. M. Veiga, J. M. S. S. Esperanca and A. Rodriguez, J. Chem. Thermodyn., 2009, 41, 1419–1423.	101.325	323.15	1.46165	1.4748	0.89979	1.34642	-7.88377
284	training set	1-butyl-3-methylimidazolium iodide	M. H. Ghatee, M. Zare, F. Moosavi and A. R. Zolghadr, J. Chem. Eng. Data, 2010, 55, 3084-3088.	101.325	358.15	1.4621	1.50082	2.64804	1.35491	-7.33135
285	training set	1-ethyl-3-methylimidazolium trifluoromethylsulfonate	H. Rodriguez, J. F. Brennecke, J. Chem. Eng. Data, 2006, 51, 2145-2155.	101.325	308.15	1.4624	1.52231	4.09635	1.66528	13.8732
286	training set	1-butyl-3-methylimidazolium bis((trifluoromethyl)sulfonyl)amide	K. R. Harris, M. Kanakubo, L. A. Bis(trifluoromethylsulfonyl)imide. Woolf, J. Chem. Eng. Data, 2007, 52, 1080-1085.	125500	348.15	1.4624	1.55105	6.06186	1.67089	14.2564
287	training set	1-hexyl pyridinium bis((trifluoromethyl)sulfonyl)amide	J. M. Crosthwaite, M. J. Muldoon, J. N. K. Dixon, J. L. Anderson and J. F. Brennecke, J. Chem. Thermodyn, 2005, 37, 559-568.	101.325	323	1.4624	1.59424	9.01557	1.40728	-3.76888
288	training	1-butyl-3-methylimidazolium hexafluoroantimony	O.O. Okoturo, T.J. VanderNoot, Temperature dependence of viscosity for room temperature ionic liquids, Journal of Electroanalytical Chemistry, 568 (2004) 167–181	101.325	343.15	1.4624	1.62271	10.9625	1.55851	6.57209
289	training	1-butyl-3-methylimidazolium bis(trifluoromethylsulfonyl)imide	O.O. Okoturo, T.J. VanderNoot, Temperature dependence of viscosity for room temperature ionic liquids, Journal of Electroanalytical Chemistry, 568 (2004) 167–181	101.325	313.15	1.4624	1.66703	13.9926	1.60726	9.90555
290	training set	1-hexyl-3-methylimidazolium iodide	M. H. Ghatee, M. Zare, F. Moosavi and A. R. Zolghadr, J. Chem. Eng. Data, 2010, 55, 3084-3088.	101.325	373.15	1.4627	1.37311	-6.12477	1.31075	-10.3884
291	training set	1-decyl-3-methylimidazolium bis(trifluoromethylsulfonyl)imide	A. Ahosseini and A. M. Scurto, Int. J. Thermophys, 2008, 29, 1222-1243.	47960	343.15	1.46464	1.65901	13.2708	1.63463	11.6062
292	training set	1-ethyl-3-methyl imidazolium ethylsulfate	E. Go´mez, B. Gonza´lez, N. Calvar, E. Tojo, A. Domı´nguez, J. Chem. Eng. Data, 2006, 51, 2096-2102	101.325	328.15	1.46503	1.72012	17.4121	1.50554	2.76507
293	training	1-ethyl-3-methylimidazolium ethylsulfate	Gonzalez, E. J., Gonzales, B., Calvar, N., Dominguez, A., Physical Properties of Binary Mixtures of the Ionic Liquid 1-ethyl-3-methylimidazolium Ethyl Sulfate with Several Alcohols at T = (298.15, 313.15, and 328.15) K and Atmospheric Pressure, J. Chem. Eng. Data, 52 1641-1648.	101.325	328.15	1.46509	1.75104	19.5178	1.42385	-2.81433
294	training set	1-butyl-3-methyl-imidazolium bis(trifluoromethylsulfonyl)imide	K. R. Harris, M. Kanakubo, L. A. Bis(trifluoromethylsulfonyl)imide. Woolf, J. Chem. Eng. Data, 2007, 52, 1080-1085.	35600	323.15	1.46538	1.63263	11.4135	1.51452	3.35337
295	training set	1-butyl-3-methylimidazolium hexafluorophosphate	D.Tomida, A.Kumagai, K.Qiao, C.Yokoyama, Int. J. Thermophys, 2006, 27, 39-47.	15000	353.15	1.46687	1.64273	11.9888	1.47925	0.84388
296	training	1-butyl-3-methylimidazolium dicyanamide	Yukihiro Yoshida, Osamu Baba, and Gunzi Saito, Ionic Liquids Based on Dicyanamide Anion: Influence of Structural Variations in Cationic Structures on Ionic Conductivity, J. Phys. Chem. B, 111 (2007) 4742-4749.	101.325	298.15	1.46687	2.10343	43.3957	1.67138	13.9421
297	test	1-butyl-3-methylimidazolium dicyanamide	Y. Yoshida, O. Baba, C. Larriba, and G. Saito, Imidazolium-Based Ionic Liquids Formed with Dicyanamide Anion: Influence of Cationic Structure on Ionic Conductivity, J. Phys. Chem. B, 111 (2007) 12204-12210.	101.325	298.15	1.46687	2.10343	43.3957	1.67138	13.9421
298	training set	1-ethyl-3-methylimidazolium tetrafluoroborate	K. R. Seddon, A. S. Stark, M.J. Torres, M. Abraham, L. Moens, Eds., ACS Symposium Series 819, American Chemical Society: Washington DC, 2002, 34-49.	101.325	313.15	1.46835	1.71464	16.7734	1.47884	0.71426
299	training set	1-butyl-3-methylimidazolium trifluoromethylsulfonate	M. L. Ge, R. S. Zhao, Y. F. Yi, Q. Zhang and L. S. Wang, J. Chem. Eng. Data, 2008, 53, 2408-2411.	101.325	323.15	1.4706	1.41504	-3.77825	1.68104	14.3099
300	training set	1-octyl-3-methylimidazolium iodide	M. H. Ghatee, M. Zare, F. Moosavi and A. R. Zolghadr, J. Chem. Eng. Data, 2010, 55, 3084-3088.	101.325	378.15	1.4764	1.38831	-5.96633	1.41502	-4.15711
301	training set	1-butyl-3-methylimidazolium methylsulfate	A. B.Pereiro, P. Verdía, E. Tojo, A. Rodríguez, J. Chem. Eng. Data, 2007, 52, (2), 377-380.	101.325	343.15	1.47698	1.60221	8.47859	1.36664	-7.47081
302	training set	1-hexyl-3-methylimidazolium tetrafluoroborate	A. Muhammad, M. I. Abdul Mutalib, C. D. Wilfred, T. Murugesan and A. Shafeeq, J. Chem. Thermodyn., 2008, 40, 1433–1438.	101.325	328.2	1.47712	1.73382	17.3784	1.54538	4.62107
303	training set	1-ethyl-3-methylimidazolium ethylsulfate	H. Rodriguez, J. F. Brennecke, J. Chem. Eng. Data, 2006, 51, 2145-2155.	101.325	328.15	1.47712	1.72012	16.4511	1.50554	1.92396
304	training	Tri-ethylsulfonium bis((trifluoromethyl)sulfonyl)imide	Olivier-Bourbigou H, Magna L. Ionic liquids: perspectives for organic and catalytic reactions. J. Mol. Catal. A: Chem. 2002. 182-183, 419-437.	101.325	298.15	1.47712	1.7612	19.2316	1.63745	10.8539
305	training	Tri-ethylsulfonium bis((trifluoromethyl)sulfonyl)imide	Matsumoto H, Matsuda T, Miyazaki Y. Room temperature molten salts based on trialkylsulfonium cations and bis(trifluoromethylsulfonyl) imide. Chem. Lett. 2000. 1430-1431.	101.325	298.15	1.47712	1.7612	19.2316	1.63745	10.8539
306	test set	1-hexyl-2,3-dimethylimidazolium bis(trifluoromethylsulfonyl)imide	J. M. Crosthwaite, M. J. Muldoon, J. N. K. Dixon, J. L. Anderson and J. F. Brennecke, J. Chem. Thermodyn, 2005, 37, 559-568.	101.325	333	1.47712	1.47769	0.03871	1.30508	-11.6471
307	training set	1-octyl-3-methylimidazolium tetrafluoroborate	B. Mokhtarani, M. M. Mojtahedi, H. R. Mortaheb, M. Mafi, F. Yazdani and F. Sadeghian, J. Chem. Eng. Data, 2008, 53, 677-682.	101.325	353.15	1.47871	1.40987	-4.6554	1.63486	10.5597
308	training set	1-butyl-3-methylimidazolium hexafluorophosphate	D.Tomida, A.Kumagai, K.Qiao, C.Yokoyama, Int. J. Thermophys, 2006, 27, 39-47.	20000	353.15	1.4843	1.66183	11.9605	1.50698	1.52828
309	test set	1-ethyl-3-methylimidazolium methylsulfate	A. J. L. Costa, J. M. S. S. Esperança, I. M. Marrucho and L. s. P. N. Rebelo, J. Chem. Eng. Data, 2011, 56, 3433-3441.	101.325	323.15	1.4843	1.79448	20.8971	1.57961	6.42121
310	training set	1-butyl-3-methylimidazolium nitrate	B. Mokhtarani, A. Sharifi, H. R. Mortaheb, M. Mirzaei, M. Mafi and F. Sadeghian, J. Chem. Thermodyn, 2009, 41, 1432-1438.	101.325	333.15	1.48572	1.90051	27.9187	1.43407	-3.47632
311	training	1-butyl-3-methylimidazolium hexafluorophosphate	K. S. Mali, G. B. Dutt, and T. Mukherjee, Photoisomerization of cyanine derivatives in 1-butyl-3-methylimidazolium hexafluorophosphate and aqueous glycerol: Influence of specific interactions, J. Chem. Phys., 128 (2008) 124515.	101.325	343	1.48572	1.75837	18.3511	1.60747	8.19451
312	training set	1-butyl-3-methylimidazolium octylsulfate	P. Wasserscheid, R. van Hal and A. Bosmann, Green Chem., 2002, 4, 400-404.	101.325	363.1	1.48714	0.92007	-38.1314	1.6071	8.06672
313	training set	1-butyl-3-methylimidazolium trifluoromethylsulfonate	H. Tokuda, S. Tsuzuki, M. A. B. H. Susan, K. Hayamizu and M. Watanabe, J. Phys. Chem. B, 2006, 110, 19593-19600.	101.325	323.1	1.48855	1.41589	-4.88146	1.68183	12.9845
314	training set	1-butylpyridinium tetrafluoroborate	B. Mokhtarani, A. Sharifi, H. R. Mortaheb, M. Mirzaei, M. Mafi and F. Sadeghian, J. Chem. Thermodyn, 2009, 41, 323-329.	101.325	333.15	1.4894	1.53982	3.38499	1.30438	-12.4226
315	training set	1-butyl-3-methylimidazolium trifluoromethylsulfonate	K. R. Seddon, A. S. Stark, M.J. Torres, M. Abraham, L. Moens, Eds., ACS Symposium Series 819, American Chemical Society: Washington DC, 2002, 34-49.	101.325	323.15	1.48996	1.41504	-5.02852	1.68104	12.8246
316	training set	1-methyl-3-octylimidazolium hexafluorophosphate	K. R. Seddon, A. S. Stark, M.J. Torres, M. Abraham, L. Moens, Eds., ACS Symposium Series 819, American Chemical Society: Washington DC, 2002, 34-49.	101.325	363.15	1.49136	1.64331	10.1889	1.70345	14.2213
317	training	1-butyl-3-methylimidazolium dicyanamide	Jacqueline A. Whitehead, Geoffrey A. Lawrance, Adam McCluskey, Analysis of Gold in Solutions Containing Ionic Liquids by inductively coupled plasma atomic emission spectrometry, Aust. J. Chem., 57 (2004) 151-155.	101.325	298.15	1.49136	2.10343	41.0406	1.67138	12.0707
318	training	1-butyl-3-methylimidazolium tetrafluoroborate	O.O. Okoturo, T.J. VanderNoot, Temperature dependence of viscosity for room temperature ionic liquids, Journal of Electroanalytical Chemistry, 568 (2004) 167–181	101.325	333.15	1.49136	1.52237	2.07947	1.27969	-14.1928
319	test	1-butyl-3-methylimidazolium tetrafluoroborate	Zhou, Q.; Wang, L.-S.; Densities and Viscosities of 1-butyl-3-methylimidazolium tetrafluoroborate + H2O Binary Mixtures from (303.15 to 353.15) K; J. Chem. Eng. Data, 51 905-908.	101.325	323.15	1.49248	1.69237	13.3933	1.53951	3.15117
320	training set	1,3-dimethylimidazolium bis(trifluoromethylsulfonyl)imide	H. Tokuda, S. Tsuzuki, M. A. B. H. Susan, K. Hayamizu and M. Watanabe, J. Phys. Chem. B, 2006, 110, 19593-19600.	101.325	303.1	1.49276	1.68628	12.9639	1.61154	7.95731
321	training set	1-ethyl-3-methylimidazolium n-octylsulfate	B. Hasse, J. Lehmann, D. Assenbaum, P. Wasserscheid, A. Leipertz and A. P. Fröba, J. Chem. Eng. Data ,2009, 54, 2576-2583.	101.325	363.15	1.49554	0.77149	-48.4139	1.66229	11.1496
322	training set	1-octyl-3-methylimidazolium bis(trifluoromethylsulfonyl)imide	H. Tokuda, K. Hayamizu, K. Ishii, M. A. B. H. Susan and M. Watanabe, J. Phys. Chem. B, 2005, 109, 6103-6110.	101.325	323.15	1.49582	1.72452	15.2894	1.39488	-6.74818
323	training	1-ethyl-3-methylimidazolium tetrafluoroborate	Zhang, S.; Li, X.; Chen, H.; Wang, J.; Zhang, J.; Zhang, M.; Determination of Physical Properties for the Binary System of 1-ethyl-3-methylimidazolium tetrafluoroborate + H2O; J. Chem. Eng. Data, 49 760-764.	101.325	303.15	1.4964	1.88464	25.9448	1.70763	14.1156
324	test set	1-hexyl-3-methylimidazolium tetrafluoroborate	K. R. Seddon, A. S. Stark, M.J. Torres, M. Abraham, L. Moens, Eds., ACS Symposium Series 819, American Chemical Society: Washington DC, 2002, 34-49.	101.325	343.15	1.49831	1.47967	-1.24406	1.46679	-2.10403
325	test set	1-methyl-3-methyl imidazolium bis(trifluoromethylsulfonyl)imide	H. Tokuda, K. Hayamizu, K. Ishii, M. A. B. H. Susan and M. Watanabe, J. Phys. Chem. B, 2005, 109, 6103-6110.	101.325	303.15	1.49941	1.68543	12.4062	1.61077	7.4272
326	training set	1-octyl-3-methylimidazolium bis(trifluoromethylsulfonyl)imide	H. Tokuda, S. Tsuzuki, M. A. B. H. Susan, K. Hayamizu and M. Watanabe, J. Phys. Chem. B, 2006, 110, 19593-19600.	101.325	323.1	1.50243	1.72537	14.8387	1.39562	-7.10945
327	training set	1-butyl-3-methylimidazolium nitrate	K. R. Seddon, A. S. Stark, M.J. Torres, M. Abraham, L. Moens, Eds., ACS Symposium Series 819, American Chemical Society: Washington DC, 2002, 34-49.	101.325	353.15	1.50379	1.68781	12.2371	1.54378	2.65915
328	training set	1-ethyl-3-methylpyridinium ethylsulfate	J. M. Crosthwaite, M. J. Muldoon, J. N. K. Dixon, J. L. Anderson and J. F. Brennecke, J. Chem. Thermodyn, 2005, 37, 559-568.	101.325	333	1.50515	1.62143	7.72515	1.44731	-3.84271
329	training set	1-hexyl-3-methylimidazolium bis(trifluoromethylsulfonyl)imide	A. Muhammad, M. I. Abdul Mutalib, C. D. Wilfred, T. Murugesan and A. Shafeeq, J. Chem. Thermodyn., 2008, 40, 1433–1438.	101.325	318.2	1.50515	1.70847	13.5084	1.51684	0.77673
330	training set	1-ethyl-3-methylimidazolium bis(trifluoromethylsulfonyl)imide	J. M. Crosthwaite, M. J. Muldoon, J. N. K. Dixon, J. L. Anderson and J. F. Brennecke, J. Chem. Thermodyn, 2005, 37, 559-568.	101.325	298	1.50515	1.77684	18.0509	1.68984	12.2707
331	training set	1-butyl-3-methylimidazolium methylsulfate	A. Ferna´ndez, J. Garcı´a, J. S. Torrecilla,*M. Oliet, F. Rodrı´guez, J. Chem. Eng. Data, 2008, 53, 1518–1522	101.325	343.15	1.50786	1.60221	6.25702	1.36664	-9.36575
332	test set	1-butylpyridinium bis(trifluoromethylsulfonyl)imide	H. Tokuda, S. Tsuzuki, M. A. B. H. Susan, K. Hayamizu and M. Watanabe, J. Phys. Chem. B, 2006, 110, 19593-19600.	101.325	313.1	1.5092	1.68532	11.6696	1.61481	6.99797
333	training set	1-ethyl-3-methylimidazolium n-butylsulfate	A. J. L. Costa, J. M. S. S. Esperança, I. M. Marrucho and L. s. P. N. Rebelo, J. Chem. Eng. Data, 2011, 56, 3433-3441.	101.325	338.15	1.51055	1.43469	-5.02188	1.48465	-1.71486
334	training	1-butyl-3-methylimidazolium dicyanamide	Deng M J, Chen P Y, Leong T I, et al. Dicyanamide anion based ionic liquids for electrodeposition of metals. Electrochem. Commun. 2008. 10, 213-216.	101.325	301.15	1.51322	2.05243	35.6332	1.58645	4.83941
335	training	1-butyl-3-methylimidazolium dicyanamide	Ming-Jay Deng, Po-Yu Chen, Tin-Iao Leong , I-Wen Sun,Jeng-Kuei Chang, Wen-Ta Tsai, Dicyanamide anion based ionic liquids for electrodeposition of metals, Electrochemistry Communications, 10 (2008) 213-216.	101.325	301	1.51322	2.05498	35.8017	1.59022	5.0885
336	test	1-butyl-3-methylimidazolium dicyanamide	Ming-Jay Deng, Po-Yu Chen, Tin-Iao Leong , I-Wen Sun,Jeng-Kuei Chang, Wen-Ta Tsai, Dicyanamide anion based ionic liquids for electrodeposition of metals, Electrochemistry Communications, 10 (2008) 213-216.	101.325	301	1.51322	2.05498	35.8017	1.59022	5.0885
337	training set	1-octyl-3-methylimidazolium tetrafluoroborate	K. R. Harris, M. Kanakubo and L. A. Woolf, J. Chem. Eng. Data, 2006, 51, 1161-1167.	300	348.15	1.51455	1.49563	-1.24928	1.69744	12.0758
338	test set	1-octyl-3-methylimidazolium tetrafluoroborate	K. R. Harris, M. Kanakubo and L. A. Woolf, J. Chem. Eng. Data, 2006, 51, 1161-1167.	100	348.15	1.51587	1.49486	-1.38567	1.69764	11.9913
339	training set	N-butyl-3-methylpyridinium tetrafluoroborate	J. M. Crosthwaite, M. J. Muldoon, J. N. K. Dixon, J. L. Anderson and J. F. Brennecke, J. Chem. Thermodyn, 2005, 37, 559-568.	101.325	318.15	1.51851	1.74729	15.0661	1.7186	13.1766
340	training set	1-butyl-3-methylimidazolium tetrafluoroborate	K. R. Harris, M. Kanakubo and L. A. Woolf, J. Chem. Eng. Data, 2007, 52, 2425-2430.	100600	348.15	1.51851	1.65128	8.74337	1.73022	13.9419
341	training	Tri-ethylsulfonium bis((trifluoromethyl)sulfonyl)imide	Matsumoto H, Sakaebe H, Tatsumi K. Preparation of room temperature ionic liquids based on aliphatic onium cations and asymmetric amide anions and their electrochemical properties as a lithium battery electrolyte. J. Power Sources. 2005. 146, 45-50.	101.325	298.15	1.51851	1.7612	15.9815	1.63745	7.83214
342	training	1-butyl-3-methylimidazolium trifluoromethanesulfonate	O.O. Okoturo, T.J. VanderNoot, Temperature dependence of viscosity for room temperature ionic liquids, Journal of Electroanalytical Chemistry, 568 (2004) 167–181	101.325	323.15	1.51851	1.41504	-6.81435	1.68104	10.7031
343	training	1-ethyl-3-methylimidazolium bis(trifluoromethylsulfonyl)imide	Hajime Matsumoto Hikari Sakaebe , Kuniaki Tatsumi, Manabu Kikuta , Eriko Ishiko , Michiyuki Kono, Fast cycling of Li/LiCoO2 cell with low-viscosity ionic liquids based on bis(fluorosulfonyl)imide [FSI]−,Journal of Power Sources 160 (2006) 1308-1313.	101.325	298	1.51851	1.77684	17.012	1.68984	11.2826
344	training set	1-octyl-3-methylimidazolium tetrafluoroborate	K. R. Harris, M. Kanakubo and L. A. Woolf, J. Chem. Eng. Data, 2006, 51, 1161-1167.	1600	348.15	1.52114	1.50059	-1.35063	1.69636	11.5191
345	training set	1-octyl-3-methylimidazolium tetrafluoroborate	K. R. Harris, M. Kanakubo and L. A. Woolf, J. Chem. Eng. Data, 2006, 51, 1161-1167.	3100	348.15	1.52763	1.50632	-1.39464	1.69556	10.9925
346	training set	1-ethyl-3-methylimidazolium nitrate	K. R. Seddon, A. S. Stark, M.J. Torres, M. Abraham, L. Moens, Eds., ACS Symposium Series 819, American Chemical Society: Washington DC, 2002, 34-49.	101.325	313.15	1.52892	2.09278	36.8798	1.69559	10.9014
347	training	1-ethyl-3-methylimidazolium dicyanamide	Andreas P. Froba, Heiko Kremer, and Alfred Leipertz, Density, Refractive Index, Interfacial Tension, and Viscosity of Ionic Liquids [EMIM][EtSO4], [EMIM][NTf2], [EMIM][N(CN)2], and [OMA][NTf2] in Dependence on Temperature at Atmospheric Pressure, J. Phys. Chem. B, 112 (2008) 12420-12430.	101.325	283.15	1.52892	2.21069	44.5921	1.74035	13.8288
348	training set	1-octyl-3-methylimidazolium iodide	M. H. Ghatee, M. Zare, F. Moosavi and A. R. Zolghadr, J. Chem. Eng. Data, 2010, 55, 3084-3088.	101.325	373.15	1.53033	1.47331	-3.72579	1.48687	-2.8397
349	training	1-butyl-3-methylimidazolium bis(trifluoromethylsulfonyl)imide	O.O. Okoturo, T.J. VanderNoot, Temperature dependence of viscosity for room temperature ionic liquids, Journal of Electroanalytical Chemistry, 568 (2004) 167–181	101.325	308.15	1.53148	1.75203	14.4009	1.71759	12.1522
350	training	1-ethyl-3-methylimidazolium bis(trifluoromethylsulfonyl)imide	Pierre Bonhote,Ana-Paula Dias, Nicholas Papageorgiou, Kuppuswamy Kalyanasundaram, and Michael Gra1tzel,Hydrophobic, Highly Conductive Ambient-Temperature Molten Salts, Inorg. Chem. 35 (1996) 1168-1178.	101.325	293.15	1.53148	1.85929	21.4051	1.74253	13.7811
351	test set	1-butyl-3-methyl pyridinium bis((trifluoromethyl)sulfonyl)amide	J. M. Crosthwaite, M. J. Muldoon, J. N. K. Dixon, J. L. Anderson and J. F. Brennecke, J. Chem. Thermodyn, 2005, 37, 559-568.	101.325	313	1.53148	1.63949	7.05277	1.59694	4.27462
352	test	1-ethyl-3-methylimidazolium bis(trifluoromethylsulfonyl)imide	Jennifer M. Pringle, Jake Golding, Krisztian Baranyai, Craig M. Forsyth, Glen B. Deacon, Janet L. Scott and Douglas R. MacFarlane, The effect of anion fluorination in ionic liquids—physical properties of a range of bis(methanesulfonyl)amide salts, New J. Chem., 27 (2003) 1504-1510.	101.325	293.15	1.53148	1.85929	21.4051	1.74253	13.7811
353	test set	Trimethyl(butyl)ammonium bis(trifluoromethylsulfonyl)imide	H. Tokuda, S. Tsuzuki, M. A. B. H. Susan, K. Hayamizu and M. Watanabe, J. Phys. Chem. B, 2006, 110, 19593-19600.	101.325	323.1	1.53275	1.46008	-4.74143	1.3312	-13.1497
354	training	1-hexyl-3-methylimidazolium bis(trifluoromethylsulfonyl)imide	Kenneth N. Marsh, Joan F. Brennecke, Robert D. Chirico，Michael Frenkel, Andreas Heintz, Joseph W. Magee, Cor J. Peters, Luis Paulo N. Rebelo, and Kenneth R. Seddon，Thermodynamic and thermophysical properties of the reference ionic liquid: 1-hexyl-3-methylimidazolium bis[(trifluoromethyl)sulfonyl]amide (including mixtures),Pure Appl. Chem., 2009 Vol.81 No.5 781-790.	101.325	313.15	1.53403	1.79432	16.9681	1.6558	7.9382
355	training set	1-butyl-1-methyl pyrrolidinium bis(trifluoromethylsulfonyl)imide	A. B. Pereiro, H. I. M. Veiga, J. M. S. S. Esperanca and A. Rodriguez, J. Chem. Thermodyn., 2009, 41, 1419–1423.	101.325	318.15	1.53555	1.5598	1.57935	1.46816	-4.38874
356	training set	1-octyl-3-methyl imidazolium tetrafluoroborate	K. R. Harris, M. Kanakubo and L. A. Woolf, J. Chem. Eng. Data, 2006, 51, 1161-1167.	5400	348.15	1.53656	1.51511	-1.39591	1.69523	10.3262
357	training set	1-ethyl-3-methylimidazolium ethylsulfate	E. Go´mez, B. Gonza´lez, N. Calvar, E. Tojo, A. Domı´nguez, J. Chem. Eng. Data, 2006, 51, 2096-2102	101.325	323.15	1.53735	1.80512	17.4178	1.59754	3.91544
358	training set	1-butyl-3-methylimidazolium bis(trifluoromethylsulfonyl)imide	K. R. Harris, M. Kanakubo, L. A. Bis(trifluoromethylsulfonyl)imide. Woolf, J. Chem. Eng. Data, 2007, 52, 1080-1085.	150600	348.15	1.53908	1.64693	7.00748	1.75106	13.7734
359	training set	1-butyl-3-methylimidazolium hexafluorophosphate	K. R. Harris, L. A. Woolf and M. Kanakubo, J. Chem. Eng. Data, 2005, 50, 1777-1782.	100	343.15	1.53908	1.75581	14.0819	1.60546	4.31288
360	training set	1-butyl-3-methylimidazolium bis((trifluoromethyl)sulfonyl)amide	K. R. Harris, M. Kanakubo, L. A. Bis(trifluoromethylsulfonyl)imide. Woolf, J. Chem. Eng. Data, 2007, 52, 1080-1085.	52000	323.15	1.53908	1.69528	10.1488	1.64514	6.89098
361	test set	1-hexyl-3-methylimidazolium hexafluorophosphate	D.Tomida, A.Kumagai, S. Kenmochi, K. Qiao, C. Yokoyama, J. Chem. Eng. Data, 2007, 52, 577-579.	100	353.15	1.54033	1.71311	11.217	1.71238	11.1699
362	test set	1-butyl-3-methylimidazolium hexafluorophosphate	K. R. Harris, L. A. Woolf and M. Kanakubo, J. Chem. Eng. Data, 2005, 50, 1777-1782.	100	343.15	1.54033	1.75581	13.9893	1.60546	4.22823
363	training set	1-hexyl-3-methylimidazolium hexafluorophosphate	K. R. Harris, M. Kanakubo, L. A. Bis(trifluoromethylsulfonyl)imide. Woolf, J. Chem. Eng. Data, 2007, 52, 1080-1085.	100	353.15	1.54158	1.71311	11.1268	1.71238	11.0797
364	test set	1-butyl-3-methylimidazolium bis(trifluoromethylsulfonyl)imide	K. R. Harris, M. Kanakubo, L. A. Bis(trifluoromethylsulfonyl)imide. Woolf, J. Chem. Eng. Data, 2007, 52, 1080-1085.	53900	323.15	1.54158	1.70254	10.441	1.65992	7.67652
365	test set	1-hexyl-3-methylimidazolium hexafluorophosphate	K. R. Harris, M. Kanakubo, L. A. Bis(trifluoromethylsulfonyl)imide. Woolf, J. Chem. Eng. Data, 2007, 52, 1080-1085.	100	353.15	1.54158	1.71311	11.1268	1.71238	11.0797
366	training set	1-butyl-3-methylimidazolium iodide	M. H. Ghatee, M. Zare, F. Moosavi and A. R. Zolghadr, J. Chem. Eng. Data, 2010, 55, 3084-3088.	101.325	353.15	1.5417	1.58582	2.86159	1.44449	-6.30527
367	training set	1-butyl-3-methylimidazolium thiocyanate	U. Domańska and M. Laskowska, J. Chem. Eng. Data, 2009, 54, 2113-2119.	101.325	308.15	1.54283	2.20269	42.7695	1.67064	8.28435
368	training	1-propyl-3-methylimidazolium pentafluoroethyltrifluoroborate	Zhang, S., Ionic liquids : physicochemical properties. Elsevier: Amsterdam ; London, 2009.	101.325	298.15	1.54407	1.47394	-4.54151	1.75661	13.7651
369	training	1-propyl-3-methylimidazolium pentafluoroethyltrifluoroborate	Zhi-Bin Zhou, Hajime Matsumoto, and Kuniaki Tatsumi, Low-Melting, Low-Viscous, Hydrophobic Ionic Liquids: 1-Alkyl(Alkyl Ether)-3-methylimidazolium Perfluoroalkyltrifluoroborate, Chem. Eur. J., 10 (2004) 6581-6591.	101.325	298.15	1.54407	1.47394	-4.54151	1.75661	13.7651
370	training set	1-butyl-3-methylimidazolium hexafluorophosphate	K. R. Harris, L. A. Woolf and M. Kanakubo, J. Chem. Eng. Data, 2005, 50, 1777-1782.	100	343.15	1.54531	1.75581	13.622	1.60546	3.89234
371	training set	1-butyl-3-methylimidazolium trifluoromethane sulfonate	M. L. Ge, R. S. Zhao, Y. F. Yi, Q. Zhang and L. S. Wang, J. Chem. Eng. Data, 2008, 53, 2408-2411.	101.325	318.15	1.54622	1.50004	-2.98683	1.75854	13.7315
372	training set	1-butyl-3-methylimidazolium hexafluorophosphate	W. Fan, Q. Zhou, J. Sun and S. J. Zhang, J. Chem. Eng. Data, 2009, 54, 2307-2311.	101.325	343.15	1.54721	1.75582	13.4828	1.60546	3.76474
373	training set	1-hexyl-3-methylimidazolium bis(trifluoromethylsulfonyl)imide	H. Tokuda, K. Hayamizu, K. Ishii, M. A. B. H. Susan and M. Watanabe, J. Phys. Chem. B, 2005, 109, 6103-6110.	101.325	313.15	1.54986	1.79432	15.7731	1.6558	6.83547
374	training set	1-butyl-3-methylimidazolium tetrafluoroborate	K. R. Harris, M. Kanakubo and L. A. Woolf, J. Chem. Eng. Data, 2007, 52, 2425-2430.	100	323.15	1.55145	1.69237	9.08305	1.53951	-0.76946
375	training	1-ethyl-3-methylimidazolium ethylsulfate	Andreas P. Froba, Heiko Kremer, and Alfred Leipertz, Density, Refractive Index, Interfacial Tension, and Viscosity of Ionic Liquids [EMIM][EtSO4], [EMIM][NTf2], [EMIM][N(CN)2], and [OMA][NTf2] in Dependence on Temperature at Atmospheric Pressure, J. Phys. Chem. B, 112 (2008) 12420-12430.	101.325	323.15	1.55145	1.83604	18.3433	1.53287	-1.19779
376	test set	1-ethyl-3-methylimidazolium trifluoromethylsulfonate	K. R. Seddon, A. S. Stark, M.J. Torres, M. Abraham, L. Moens, Eds., ACS Symposium Series 819, American Chemical Society: Washington DC, 2002, 34-49.	101.325	303.15	1.55145	1.60731	3.60018	1.73915	12.0981
377	test set	1-decyl-3-methylimidazolium bis(trifluoromethylsulfonyl)imide	A. Ahosseini and A. M. Scurto, Int. J. Thermophys, 2008, 29, 1222-1243.	68870	343.15	1.55291	1.73889	11.976	1.75295	12.8819
378	training set	1-octyl-3-methylimidazolium tetrafluoroborate	B. Mokhtarani, M. M. Mojtahedi, H. R. Mortaheb, M. Mafi, F. Yazdani and F. Sadeghian, J. Chem. Eng. Data, 2008, 53, 677-682.	101.325	348.15	1.55364	1.49487	-3.78273	1.69764	9.26863
379	training set	1-ethyl-3-methylimidazolium methylsulfate	A. J. L. Costa, J. M. S. S. Esperança, I. M. Marrucho and L. s. P. N. Rebelo, J. Chem. Eng. Data, 2011, 56, 3433-3441.	101.325	318.15	1.55509	1.87948	20.8596	1.67425	7.6627
380	training set	1-hexyl-3-methylimidazolium hexafluoroborate	D.Tomida, A.Kumagai, S. Kenmochi, K. Qiao, C. Yokoyama, J. Chem. Eng. Data, 2007, 52, 577-579.	5000	353.15	1.5563	1.73183	11.2784	1.71418	10.1449
381	training set	1-ethyl-3-methylimidazolium bis(trifluoromethylsulfonyl)imide	J. M. Crosthwaite, M. J. Muldoon, J. N. K. Dixon, J. L. Anderson and J. F. Brennecke, J. Chem. Thermodyn, 2005, 37, 559-568.	101.325	293	1.5563	1.86184	19.6327	1.74432	12.0814
382	training set	1-butyl-3-methylimidazolium tetrafluoroborate	K. R. Harris, M. Kanakubo and L. A. Woolf, J. Chem. Eng. Data, 2007, 52, 2425-2430.	140	323.15	1.5563	1.69252	8.75293	1.53949	-1.08001
383	test set	1-octyl-3-methylimidazolium tetrafluoroborate	K. R. Harris, M. Kanakubo and L. A. Woolf, J. Chem. Eng. Data, 2006, 51, 1161-1167.	10200	348.15	1.5563	1.53345	-1.46842	1.69798	9.10354
384	training set	1-decyl-3-methylimidazolium bis(trifluoromethylsulfonyl)imide	A. Ahosseini and A. M. Scurto, Int. J. Thermophys, 2008, 29, 1222-1243.	100	323.15	1.55871	1.81618	16.5185	1.36727	-12.2823
385	training	1-hexyl-3-methylimidazolium bis(trifluoromethylsulfonyl)imide	Kandil, M. E.; Marsh, K. N.; Goodwin, A. R. H.; Measurement of the Viscosity, Density, and Electrical Conductivity of 1-hexyl-3-methylimidazolium Bis(trifluorosulfonyl)imide at Temperatures between (288 and 433) K and Pressures below 50 Mpa; J. Chem. Eng. Data, 52 2382-2387.	101.325	313.15	1.55871	1.79432	15.1159	1.6558	6.22898
386	training set	1-ethyl-3-methylimidazolium n-octylsulfate	B. Hasse, J. Lehmann, D. Assenbaum, P. Wasserscheid, A. Leipertz and A. P. Fröba, J. Chem. Eng. Data ,2009, 54, 2576-2583.	101.325	358.15	1.56229	0.85649	-45.1772	1.73547	11.085
387	training set	1-butyl-3-methyl imidazolium octylsulfate	J. Jacquemin, P. Husson, V. Majer, A. A. H. Padua and M. F. C. Gomes, Green Chem., 2008, 10, 944-950.	101.325	362.1	1.56348	0.93707	-40.065	1.62577	3.98402
388	training set	1-butyl-3-methylimidazolium nitrate	B. Mokhtarani, A. Sharifi, H. R. Mortaheb, M. Mirzaei, M. Mafi and F. Sadeghian, J. Chem. Thermodyn, 2009, 41, 1432-1438.	101.325	328.15	1.56431	1.98551	26.9259	1.50291	-3.92523
389	training set	1-butyl-3-methylimidazolium trifluoroacetate	H. Tokuda, K. Hayamizu, K. Ishii, Md. A. B. H. Susan, M. Watanabe, J. Phys. Chem. B, 2004, 108, 16593-16600.	101.325	313.1	1.56585	1.70726	9.03082	1.76674	12.8292
390	test set	1-butyl-3-methyl imidazolium bis(pentafluoroethylsulfonyl)imide	H. Tokuda, S. Tsuzuki, M. A. B. H. Susan, K. Hayamizu and M. Watanabe, J. Phys. Chem. B, 2006, 110, 19593-19600.	101.325	323.1	1.56585	1.41284	-9.77171	1.49548	-4.49432
391	training set	1-butyl-3-methylimidazolium nitrate	K. R. Seddon, A. S. Stark, M.J. Torres, M. Abraham, L. Moens, Eds., ACS Symposium Series 819, American Chemical Society: Washington DC, 2002, 34-49.	101.325	333.15	1.56703	1.90051	21.2813	1.43407	-8.48474
392	training set	1-ethyl-3-methylimidazolium tetrafluoroborate	E. Rilo, J. Vila, J. Pico, S. Garcia-Garabal, L. Segade, L. M. Varela and O. Cabeza, J. Chem. Eng. Data, 55, 639-644.	101.325	298.15	1.56738	1.96964	25.6646	1.76643	12.6998
393	training set	1-hexyl-3-methylimidazolium bis(trifluoromethylsulfonyl)imide	J. M. Crosthwaite, M. J. Muldoon, J. N. K. Dixon, J. L. Anderson and J. F. Brennecke, J. Chem. Thermodyn, 2005, 37, 559-568.	101.325	313	1.5682	1.79687	14.5818	1.66014	5.86289
394	training set	1-butyl-3-methylimidazolium trifluoroacetate	J. M. Crosthwaite, M. J. Muldoon, J. N. K. Dixon, J. L. Anderson and J. F. Brennecke, J. Chem. Thermodyn, 2005, 37, 559-568.	101.325	313	1.5682	1.70896	8.97584	1.76865	12.7822
395	training	1-butyl-3-methylimidazolium dicyanamide	Berthod A, Ruiz-Angel M, Carda-Broch S. Ionic liquids in separation techniques. J. Chromatogr. A. 2008. 1184, 6-18.	101.325	298.15	1.5682	2.10343	34.1298	1.67138	6.57934
396	training set	1-butylpyridinium tetrafluoroborate	B. Mokhtarani, A. Sharifi, H. R. Mortaheb, M. Mirzaei, M. Mafi and F. Sadeghian, J. Chem. Thermodyn, 2009, 41, 323-329.	101.325	328.15	1.56961	1.62482	3.51718	1.40165	-10.701
397	training	1-ethyl-3-methylimidazolium tetrafluoroborate	Zhang, S.; Li, X.; Chen, H.; Wang, J.; Zhang, J.; Zhang, M.; Determination of Physical Properties for the Binary System of 1-ethyl-3-methylimidazolium tetrafluoroborate + H2O; J. Chem. Eng. Data, 49 760-764.	101.325	298.15	1.57043	1.96964	25.4209	1.76643	12.4812
398	training set	1-hexyl-3-methylimidazolium bis(trifluoromethylsulfonyl)imide	H. Tokuda, S. Tsuzuki, M. A. B. H. Susan, K. Hayamizu and M. Watanabe, J. Phys. Chem. B, 2006, 110, 19593-19600.	101.325	313.1	1.57054	1.79517	14.3028	1.65725	5.52083
399	test set	1-butyl-3-methylimidazolium hexafluorophosphate	K. R. Harris, L. A. Woolf and M. Kanakubo, J. Chem. Eng. Data, 2005, 50, 1777-1782.	5500	343.15	1.57054	1.77644	13.1101	1.60896	2.44651
400	training	1-hexyl-3-methylimidazolium bis(trifluoromethylsulfonyl)imide	Jason A. Widegren and Joseph W. Magee, Density, Viscosity, Speed of Sound, and Electrolytic Conductivity for the Ionic Liquid 1-hexyl-3-methylimidazolium Bis(trifluoromethylsulfonyl)imide and Its Mixtures with Water, J. Chem. Eng. Data, 52 (2007) 2331-2338.	101.325	313.15	1.57299	1.79432	14.0709	1.6558	5.26466
401	training set	1-decyl-3-methylimidazolium bis(trifluoromethylsulfonyl)imide	A. Ahosseini and A. M. Scurto, Int. J. Thermophys, 2008, 29, 1222-1243.	2950	323.15	1.57403	1.82707	16.076	1.36906	-13.0218
402	training set	1-hexyl-3-methylimidazolium hexafluorophosphate	K. R. Seddon, A. S. Stark, M.J. Torres, M. Abraham, L. Moens, Eds., ACS Symposium Series 819, American Chemical Society: Washington DC, 2002, 34-49.	101.325	353.15	1.57519	1.71311	8.75596	1.71238	8.70957
403	training	1-hexyl-3-methylimidazolium hexafluorophosphate	Christopher Hardacre, John D. Holbrey, Suhas P. Katdare and Kenneth R. Seddon, Alternating copolymerisation of styrene and carbon monoxide in ionic liquids, Green Chemistry, 4 (2002) 143-146.	101.325	353.15	1.57519	1.71311	8.75611	1.71238	8.70972
404	training	1-hexyl-3-methylimidazolium bis(trifluoromethylsulfonyl)imide	Kandil, M. E.; Marsh, K. N.; Goodwin, A. R. H.; Measurement of the Viscosity, Density, and Electrical Conductivity of 1-hexyl-3-methylimidazolium Bis(trifluorosulfonyl)imide at Temperatures between (288 and 433) K and Pressures below 50 Mpa; J. Chem. Eng. Data, 52 2382-2387.	101.325	313.15	1.57634	1.79432	13.8283	1.6558	5.04071
405	training	1-butyl-3-methylimidazolium tetrafluoroborate	Zhou, Q.; Wang, L.-S.; Densities and Viscosities of 1-butyl-3-methylimidazolium tetrafluoroborate + H2O Binary Mixtures from (303.15 to 353.15) K; J. Chem. Eng. Data, 51 905-908.	101.325	318.15	1.57738	1.77737	12.6791	1.71546	8.75367
406	training set	1-hexyl-3-methylimidazolium hexafluorophosphate	D.Tomida, A.Kumagai, S. Kenmochi, K. Qiao, C. Yokoyama, J. Chem. Eng. Data, 2007, 52, 577-579.	10000	353.15	1.57864	1.75093	10.9136	1.72187	9.0732
407	training set	1,3-dimethylimidazolium bis(trifluoromethylsulfonyl)imide	H. Tokuda, S. Tsuzuki, M. A. B. H. Susan, K. Hayamizu and M. Watanabe, J. Phys. Chem. B, 2006, 110, 19593-19600.	101.325	298.1	1.57978	1.77128	12.1219	1.67465	6.00512
408	training	1-(2-methoxyethyl)-3-methylimidazolium pentafluoroethyltrifluoroborate	Zhi-Bin Zhou, Hajime Matsumoto, and Kuniaki Tatsumi, Low-Melting, Low-Viscous, Hydrophobic Ionic Liquids: 1-Alkyl(Alkyl Ether)-3-methylimidazolium Perfluoroalkyltrifluoroborate, Chem. Eur. J., 10 (2004) 6581-6591.	101.325	298.15	1.57978	1.45043	-8.18833	1.77925	12.626
409	training	1-butyl-3-methylimidazolium hexafluoroantimony	O.O. Okoturo, T.J. VanderNoot, Temperature dependence of viscosity for room temperature ionic liquids, Journal of Electroanalytical Chemistry, 568 (2004) 167–181	101.325	333.15	1.57978	1.79271	13.4784	1.51156	-4.31885
410	training	1-ethyl-3-methylimidazolium tetrafluoroborate	Andrew P. Abbott and Katy J. McKenzie, Application of ionic liquids to the electrodeposition of metals, Phys. Chem. Chem. Phys., 8 (2006), 4265-4279.	101.325	298	1.57978	1.97219	24.8394	1.76817	11.9249
411	test	1-(2-methoxyethyl)-3-methylimidazolium pentafluoroethyltrifluoroborate	Zhang, S., Ionic liquids : physicochemical properties. Elsevier: Amsterdam ; London, 2009.	101.325	298.15	1.57978	1.45043	-8.18833	1.77925	12.626
412	training set	1-decyl-3-methylimidazolium bis(trifluoromethylsulfonyl)amide	A. Ahosseini and A. M. Scurto, Int. J. Thermophys, 2008, 29, 1222-1243.	4270	323.15	1.58206	1.83211	15.8056	1.37092	-13.3456
413	training set	1-ethyl-3-methylimidazolium n-butylsulfate	A. J. L. Costa, J. M. S. S. Esperança, I. M. Marrucho and L. s. P. N. Rebelo, J. Chem. Eng. Data, 2011, 56, 3433-3441.	101.325	333.15	1.58433	1.51969	-4.07983	1.51808	-4.1813
414	test	1-ethyl-3-methylimidazolium bis(trifluoromethylsulfonyl)imide	Andreas P. Froba, Heiko Kremer, and Alfred Leipertz, Density, Refractive Index, Interfacial Tension, and Viscosity of Ionic Liquids [EMIM][EtSO4], [EMIM][NTf2], [EMIM][N(CN)2], and [OMA][NTf2] in Dependence on Temperature at Atmospheric Pressure, J. Phys. Chem. B, 112 (2008) 12420-12430.	101.325	293.15	1.58659	1.85929	17.1882	1.74253	9.82908
415	training set	1-butyl-3-methylimidazolium tetrafluoroborate	K. R. Harris, M. Kanakubo and L. A. Woolf, J. Chem. Eng. Data, 2007, 52, 2425-2430.	125600	348.15	1.58883	1.74678	9.94121	1.79679	13.0886
416	training	1-butyl-3-methylimidazolium bis(trifluoromethylsulfonyl)imide	R. Osada, T. Hoshino, K. Okada, Y. Ohmasa, and M. Yao,Surface tension of room temperature ionic liquids measured by dynamic light scattering, J. Chem. Phys., 130 (2009) 184705.	101.325	303.15	1.58995	1.83703	15.5399	1.79894	13.1446
417	training set	1-ethyl-3-methylimidazolium bis(trifluoromethylsulfonyl)imide	H. Tokuda, K. Hayamizu, K. Ishii, M. A. B. H. Susan and M. Watanabe, J. Phys. Chem. B, 2005, 109, 6103-6110.	101.325	293.15	1.59084	1.85929	16.875	1.74253	9.53548
418	training set	1-ethyl-3-methyl imidazolium chloride	K. R. Seddon, A. S. Stark, M.J. Torres, M. Abraham, L. Moens, Eds., ACS Symposium Series 819, American Chemical Society: Washington DC, 2002, 34-49.	101.325	363.15	1.59218	2.15757	35.5106	1.80356	13.2761
419	training set	1-butyl-3-methylimidazolium hexafluorophosphate	K. R. Harris, L. A. Woolf and M. Kanakubo, J. Chem. Eng. Data, 2005, 50, 1777-1782.	10600	343.15	1.59329	1.79592	12.7178	1.61999	1.67601
420	test set	1-decyl-3-methylimidazolium bis(trifluoromethylsulfonyl)imide	A. Ahosseini and A. M. Scurto, Int. J. Thermophys, 2008, 29, 1222-1243.	6900	323.15	1.59329	1.84216	15.6199	1.37654	-13.604
421	training set	1,3-dimethylimidazolium methylsulfate	A. B. Pereiro, F. Santamarta, E. Tojo, A. Rodrı´guez, J. Tojo, J. Chem. Eng. Data, 2006, 51, 952-954	101.325	313.15	1.5934	1.96061	23.0458	1.78035	11.7327
422	training set	1-butyl-3-methylimidazolium tetrafluoroborate	K. R. Harris, M. Kanakubo and L. A. Woolf, J. Chem. Eng. Data, 2007, 52, 2425-2430.	10495	323.15	1.59439	1.73208	8.63577	1.55073	-2.7383
423	training set	1-butyl-1-methyl pyrrolidinium bis(trifluoromethylsulfonyl)imide	H. Tokuda, S. Tsuzuki, M. A. B. H. Susan, K. Hayamizu and M. Watanabe, J. Phys. Chem. B, 2006, 110, 19593-19600.	101.325	313.1	1.5955	1.64565	3.14332	1.5987	0.20046
424	training set	1-octyl-3-methylimidazolium tetrafluoroborate	K. R. Seddon, A. S. Stark, M.J. Torres, M. Abraham, L. Moens, Eds., ACS Symposium Series 819, American Chemical Society: Washington DC, 2002, 34-49.	101.325	343.1	1.5955	1.58072	-0.92635	1.7467	9.47672
425	training set	1-octyl-3-methylimidazolium tetrafluoroborate	K. R. Harris, M. Kanakubo and L. A. Woolf, J. Chem. Eng. Data, 2006, 51, 1161-1167.	100	343.15	1.5955	1.57986	-0.97994	1.7463	9.45187
426	test set	1-butyl-3-methylimidazolium tetrafluoroborate	K. R. Seddon, A. S. Stark, M.J. Torres, M. Abraham, L. Moens, Eds., ACS Symposium Series 819, American Chemical Society: Washington DC, 2002, 34-49.	101.325	323.15	1.5977	1.69237	5.92565	1.53951	-3.64201
427	training set	1-hexyl-3-methylimidazolium hexafluorophosphate	D.Tomida, A.Kumagai, S. Kenmochi, K. Qiao, C. Yokoyama, J. Chem. Eng. Data, 2007, 52, 577-579.	15000	353.15	1.59988	1.77003	10.6349	1.73514	8.45432
428	training set	1-butyl-3-methylimidazolium bis(trifluoromethylsulfonyl)amide	H. Tokuda, K. Hayamizu, K. Ishii, M. A. B. H. Susan and M. Watanabe, J. Phys. Chem. B, 2005, 109, 6103-6110.	101.325	303.15	1.60206	1.83703	14.6665	1.79894	12.2893
429	training set	1-butyl-3-methylimidazolium bis(trifluoromethylsulfonyl)imide	K. R. Harris, M. Kanakubo, L. A. Bis(trifluoromethylsulfonyl)imide. Woolf, J. Chem. Eng. Data, 2007, 52, 1080-1085.	69800	323.15	1.60423	1.76327	9.91408	1.77154	10.4293
430	test set	1-hexyl-3-methylimidazolium iodide	M. H. Ghatee, M. Zare, F. Moosavi and A. R. Zolghadr, J. Chem. Eng. Data, 2010, 55, 3084-3088.	101.325	363.15	1.60477	1.54311	-3.8421	1.49445	-6.87436
431	training set	1-decyl-3-methylimidazolium bis(trifluoromethylsulfonyl)amide	A. Ahosseini and A. M. Scurto, Int. J. Thermophys, 2008, 29, 1222-1243.	83290	343.15	1.60713	1.79397	11.6257	1.81935	13.205
432	training set	1-butyl-3-methylimidazolium bis((trifluoromethyl)sulfonyl)amide	K. R. Harris, M. Kanakubo, L. A. Bis(trifluoromethylsulfonyl)imide. Woolf, J. Chem. Eng. Data, 2007, 52, 1080-1085.	175400	348.15	1.61172	1.74167	8.06261	1.82433	13.1913
433	training set	1-butyl-3-methylimidazolium bis(trifluoromethylsulfonyl)imide	K. R. Harris, M. Kanakubo, L. A. Bis(trifluoromethylsulfonyl)imide. Woolf, J. Chem. Eng. Data, 2007, 52, 1080-1085.	175600	348.15	1.61278	1.74243	8.03896	1.8249	13.1525
434	training set	1-ethyl-3-methylimidazolium trifluromethane sulfonate	H. Rodriguez, J. F. Brennecke, J. Chem. Eng. Data, 2006, 51, 2145-2155.	101.325	298.15	1.61278	1.69231	4.93093	1.8193	12.8053
435	training	1-butyl-3-methylimidazolium bis(trifluoromethylsulfonyl)imide	O.O. Okoturo, T.J. VanderNoot, Temperature dependence of viscosity for room temperature ionic liquids, Journal of Electroanalytical Chemistry, 568 (2004) 167–181	101.325	303.15	1.61278	1.83703	13.904	1.79894	11.5427
436	training	1-butyl-3-methylimidazolium tetrafluoroborate	O.O. Okoturo, T.J. VanderNoot, Temperature dependence of viscosity for room temperature ionic liquids, Journal of Electroanalytical Chemistry, 568 (2004) 167–181	101.325	323.15	1.61278	1.69237	4.93496	1.53951	-4.54322
437	training	1-ethyl-3-methylimidazolium tetrafluoroborate	Takaya Sato, Gen Masuda, Kentaro Takagi, Electrochemical properties of novel ionic liquids for electric double layer capacitor applications, Electrochimica Acta, 49 (2004) 3603-3611.	101.325	298.15	1.61278	1.96964	22.1269	1.76643	9.52705
438	test set	1-ethyl-3-methylimidazolium ethylsulfate	H. Rodriguez, J. F. Brennecke, J. Chem. Eng. Data, 2006, 51, 2145-2155.	101.325	318.15	1.61278	1.89012	17.1966	1.69835	5.3056
439	training set	1-octyl-3-methylimidazolium iodide	M. H. Ghatee, M. Zare, F. Moosavi and A. R. Zolghadr, J. Chem. Eng. Data, 2010, 55, 3084-3088.	101.325	368.15	1.61479	1.55831	-3.49748	1.58996	-1.5379
440	training set	1-butyl-1-methyl pyrrolidinium bis(trifluoromethylsulfonyl)imide	A. B. Pereiro, H. I. M. Veiga, J. M. S. S. Esperanca and A. Rodriguez, J. Chem. Thermodyn., 2009, 41, 1419–1423.	101.325	313.15	1.61511	1.6448	1.83837	1.59745	-1.09328
441	training set	1-hexyl-3-methylimidazolium hexafluorophosphate	K. R. Harris, M. Kanakubo, L. A. Bis(trifluoromethylsulfonyl)imide. Woolf, J. Chem. Eng. Data, 2007, 52, 1080-1085.	100	348.15	1.61595	1.79811	11.2725	1.81392	12.2507
442	training set	1-ethyl-3-methylimidazolium ethylsulfate	E. Go´mez, B. Gonza´lez, N. Calvar, E. Tojo, A. Domı´nguez, J. Chem. Eng. Data, 2006, 51, 2096-2102	101.325	318.15	1.61669	1.89012	16.9131	1.69835	5.05091
443	training set	1-octyl-3-methylimidazolium tetrafluoroborate	K. R. Harris, M. Kanakubo and L. A. Woolf, J. Chem. Eng. Data, 2006, 51, 1161-1167.	25600	348.15	1.617	1.59227	-1.52907	1.7334	7.19881
444	training set	1-butyl-3-methylimidazolium bis(trifluoromethylsulfonyl)imide	K. R. Harris, M. Kanakubo, L. A. Bis(trifluoromethylsulfonyl)imide. Woolf, J. Chem. Eng. Data, 2007, 52, 1080-1085.	100	303.15	1.61805	1.83702	13.533	1.79894	11.1797
445	training set	1-butyl-3-methyl-imidazolium bis(trifluoromethylsulfonyl)imide	K. R. Harris, M. Kanakubo, L. A. Bis(trifluoromethylsulfonyl)imide. Woolf, J. Chem. Eng. Data, 2007, 52, 1080-1085.	100	303.15	1.61805	1.83702	13.533	1.79894	11.1797
446	test set	1-butyl-3-methylimidazolium bis(trifluoromethylsulfonyl)imide	K. R. Harris, M. Kanakubo, L. A. Bis(trifluoromethylsulfonyl)imide. Woolf, J. Chem. Eng. Data, 2007, 52, 1080-1085.	75000	323.15	1.61909	1.78314	10.1321	1.80227	11.3139
447	training set	1,3-dimethylimidazolium methylsulfate	E. Gomez, B. Gonzalez, N. Calvar and A. Dominguez, J. Chem. Thermodyn, 2008, 40, 1208-1216.	101.325	313.15	1.61993	1.96061	21.0306	1.78035	9.9028
448	training set	1-hexyl-3-methylimidazolium hexafluorophosphate	K. R. Harris, M. Kanakubo, L. A. Bis(trifluoromethylsulfonyl)imide. Woolf, J. Chem. Eng. Data, 2007, 52, 1080-1085.	800	348.15	1.62221	1.80078	11.0079	1.81385	11.8136
449	training set	1-hexyl-3-methylimidazolium hexafluorophosphate	D.Tomida, A.Kumagai, S. Kenmochi, K. Qiao, C. Yokoyama, J. Chem. Eng. Data, 2007, 52, 577-579.	20000	353.15	1.62221	1.78913	10.2894	1.75346	8.09085
450	training set	1-butyl-3-methyl imidazolium acetate	J. M. Crosthwaite, M. J. Muldoon, J. N. K. Dixon, J. L. Anderson and J. F. Brennecke, J. Chem. Thermodyn, 2005, 37, 559-568.	101.325	343	1.62325	2.07654	27.925	1.83511	13.0518
451	training set	1-hexyl pyridinium bis((trifluoromethyl)sulfonyl)amide	J. M. Crosthwaite, M. J. Muldoon, J. N. K. Dixon, J. L. Anderson and J. F. Brennecke, J. Chem. Thermodyn, 2005, 37, 559-568.	101.325	313	1.62325	1.76424	8.68589	1.64705	1.46602
452	training set	1-hexyl-2,3-dimethylimidazolium bis(trifluoromethylsulfonyl)imide	J. M. Crosthwaite, M. J. Muldoon, J. N. K. Dixon, J. L. Anderson and J. F. Brennecke, J. Chem. Thermodyn, 2005, 37, 559-568.	101.325	323	1.62325	1.64769	1.50573	1.41118	-13.0645
453	training	1-butyl-3-methylimidazolium bis(trifluoromethylsulfonyl)imide	Sergei Arzhantsev, Hui Jin, Gary A. Baker, and Mark Maroncelli, Measurements of the Complete Solvation Response in Ionic Liquids, J. Phys. Chem. B, 111 ( 200) 4978-4989.	101.325	298.15	1.62325	1.92203	18.4061	1.85662	14.3767
454	training	1-butyl-3-methylimidazolium chloride	Kuang Q L, Zhang J, Wang Z G. Revealing long-range density fluctuations in dialkylimidazolium chloride ionic liquids by dynamic light scattering. J. Phys. Chem. B. 2007. 111, 9858-9863.	101.325	377	1.62325	2.06986	27.5131	1.68057	3.53148
455	test	1-butyl-3-methylimidazolium chloride	Qinglin Kuang, Jun Zhang, and Zhigang Wang, Revealing Long-Range Density Fluctuations in Dialkylimidazolium Chloride Ionic Liquids by Dynamic Light Scattering, J. Phys. Chem. B, 111 (2007) 9858-9863.	101.325	377	1.62325	2.06986	27.5131	1.68057	3.53148
456	training set	1-octyl-3-methylimidazolium tetrafluoroborate	B. Mokhtarani, M. M. Mojtahedi, H. R. Mortaheb, M. Mafi, F. Yazdani and F. Sadeghian, J. Chem. Eng. Data, 2008, 53, 677-682.	101.325	343.15	1.62387	1.57987	-2.70957	1.7463	7.5396
457	test set	1-butyl-3-methylimidazolium methylsulfate	A. B.Pereiro, P. Verdía, E. Tojo, A. Rodríguez, J. Chem. Eng. Data, 2007, 52, (2), 377-380.	101.325	333.15	1.62572	1.77221	9.0106	1.48921	-8.39704
458	test set	1-butyl-3-methylimidazolium trifluoromethylsulfonate	M. L. Ge, R. S. Zhao, Y. F. Yi, Q. Zhang and L. S. Wang, J. Chem. Eng. Data, 2008, 53, 2408-2411.	101.325	313.15	1.62796	1.58504	-2.63661	1.83459	12.6927
459	test set	1-butyl-3-methylimidazolium iodide	M. H. Ghatee, M. Zare, F. Moosavi and A. R. Zolghadr, J. Chem. Eng. Data, 2010, 55, 3084-3088.	101.325	348.15	1.62931	1.67082	2.54752	1.53093	-6.03804
460	test set	1-octyl-3-methylimidazolium hexafluorophosphate	K. R. Seddon, A. S. Stark, M.J. Torres, M. Abraham, L. Moens, Eds., ACS Symposium Series 819, American Chemical Society: Washington DC, 2002, 34-49.	101.325	353.15	1.63144	1.81331	11.148	1.90089	16.5158
461	training set	1-ethyl-3-methylimidazolium tetrafluoroborate	K. R. Seddon, A. S. Stark, M.J. Torres, M. Abraham, L. Moens, Eds., ACS Symposium Series 819, American Chemical Society: Washington DC, 2002, 34-49.	101.325	303.15	1.63246	1.88464	15.448	1.70763	4.60471
462	training set	1-ethyl-3-methylimidazolium methylsulfate	A. J. L. Costa, J. M. S. S. Esperança, I. M. Marrucho and L. s. P. N. Rebelo, J. Chem. Eng. Data, 2011, 56, 3433-3441.	101.325	313.15	1.63246	1.96448	20.3383	1.77456	8.70487
463	training set	1-hexyl-3-methylimidazolium tetrafluoroborate	A. Muhammad, M. I. Abdul Mutalib, C. D. Wilfred, T. Murugesan and A. Shafeeq, J. Chem. Thermodyn., 2008, 40, 1433–1438.	101.325	318.2	1.63347	1.90382	16.5507	1.72435	5.56355
464	training set	1-ethyl-3-methylimidazolium n-octylsulfate	B. Hasse, J. Lehmann, D. Assenbaum, P. Wasserscheid, A. Leipertz and A. P. Fröba, J. Chem. Eng. Data ,2009, 54, 2576-2583.	101.325	353.15	1.63347	0.94149	-42.3625	1.81358	11.0265
465	test set	1-butyl-3-methylimidazolium trifluoromethylsulfonate	H. Tokuda, S. Tsuzuki, M. A. B. H. Susan, K. Hayamizu and M. Watanabe, J. Phys. Chem. B, 2006, 110, 19593-19600.	101.325	313.1	1.63448	1.58589	-2.97299	1.83535	12.2898
466	training	Tri-ethylsulfonium dicyanoamide	Gerhard D, Alpaslan S C, Gores H J, et al. Trialkylsulfonium dicyanamides - a new family of ionic liquids with very low viscosities. Chem. Commun. 2005. 40, 5080-5082.	101.325	273.15	1.63649	2.3676	44.6754	1.84815	12.9342
467	training	1-ethyl-3-methylimidazolium ethylsulfate	Ergun Altin, Johannes Gradl, Wolfgang Peukert, First Studies on the Rheological Behavior of Suspensions in Ionic Liquids, Chem. Eng. Technol., 29 (2006) No.11 1347-1354.	101.325	313.15	1.63749	2.00604	22.5069	1.84947	12.9457
468	training	1-butyl-3-methylimidazolium hexafluorophosphate	K. S. Mali, G. B. Dutt, and T. Mukherjee, Photoisomerization of cyanine derivatives in 1-butyl-3-methylimidazolium hexafluorophosphate and aqueous glycerol: Influence of specific interactions, J. Chem. Phys., 128 (2008) 124515.	101.325	333	1.63849	1.92837	17.6918	1.72432	5.23867
469	training	1,3-dimethylimidazolium bis(trifluoromethylsulfonyl)imide	Pierre Bonhote,Ana-Paula Dias, Nicholas Papageorgiou, Kuppuswamy Kalyanasundaram, and Michael Gra1tzel,Hydrophobic, Highly Conductive Ambient-Temperature Molten Salts, Inorg. Chem. 35 (1996) 1168-1178.	101.325	293.15	1.64345	1.85543	12.8983	1.72733	5.10344
470	training	1-butyl-3-methylimidazolium trifluoromethanesulfonate	O.O. Okoturo, T.J. VanderNoot, Temperature dependence of viscosity for room temperature ionic liquids, Journal of Electroanalytical Chemistry, 568 (2004) 167–181	101.325	313.15	1.64345	1.58504	-3.55444	1.83459	11.6303
471	test	1,3-dimethylimidazolium bis((trifluoromethyl)sulfonyl)imide	Bonhote P, Dias A P, Papageorgiou N, et al. Hydrophobic, highly conductive ambient-temperature molten salts. Inorg. Chem. 1996. 35, 1168-1178.	101.325	293.15	1.64345	1.85543	12.8983	1.72733	5.10344
472	training set	1-butyl-3-methylimidazolium trifluoromethylsulfonate	K. R. Seddon, A. S. Stark, M.J. Torres, M. Abraham, L. Moens, Eds., ACS Symposium Series 819, American Chemical Society: Washington DC, 2002, 34-49.	101.325	313.15	1.64444	1.58504	-3.61235	1.83459	11.5633
473	test set	1-butyl-3-methylimidazolium tetrafluoroborate	K. R. Harris, M. Kanakubo and L. A. Woolf, J. Chem. Eng. Data, 2007, 52, 2425-2430.	25446	323.15	1.64836	1.78919	8.54369	1.61902	-1.7797
474	training set	1-decyl-3-methylimidazolium bis(trifluoromethylsulfonyl)imide	A. Ahosseini and A. M. Scurto, Int. J. Thermophys, 2008, 29, 1222-1243.	93030	343.15	1.64895	1.83118	11.0511	1.85843	12.7036
475	test set	1-butyl-3-methylimidazolium nitrate	B. Mokhtarani, A. Sharifi, H. R. Mortaheb, M. Mirzaei, M. Mafi and F. Sadeghian, J. Chem. Thermodyn, 2009, 41, 1432-1438.	101.325	323.15	1.64933	2.07051	25.5367	1.58232	-4.06264
476	training	1-butyl-3-methylimidazolium bis(trifluoromethylsulfonyl)imide	Ramesh L. Gardas, Joao A.P. Coutinho, A group contribution method for viscosity estimation of ionic liquids, Fluid Phase Equilibria, 266 (2008) 195-201.	101.325	298.15	1.65128	1.92203	16.3962	1.85662	12.4352
477	training	1-butyl-3-methylimidazolium bis(trifluoromethylsulfonyl)imide	M. Fukuda , Kajimoto, M. Terazima , Y. Kimura, Application of the transient grating method to the investigation of the photo-thermalization process of malachite green in room temperature ionic liquids, Journal of Molecular Liquids 134 (2007) 49-54.	101.325	298.15	1.65321	1.92203	16.26	1.85662	12.3037
478	training	1-butyl-3-methylimidazolium hexafluorophosphate	O.O. Okoturo, T.J. VanderNoot, Temperature dependence of viscosity for room temperature ionic liquids, Journal of Electroanalytical Chemistry, 568 (2004) 167–181	101.325	343.15	1.65321	1.75582	6.20637	1.60546	-2.88856
479	test set	1-ethyl-3-methylpyridinium ethylsulfate	J. M. Crosthwaite, M. J. Muldoon, J. N. K. Dixon, J. L. Anderson and J. F. Brennecke, J. Chem. Thermodyn, 2005, 37, 559-568.	101.325	323	1.65321	1.79143	8.36041	1.62928	-1.44756
480	test set	1-hexyl-3-methylimidazolium tetrafluoroborate	K. R. Seddon, A. S. Stark, M.J. Torres, M. Abraham, L. Moens, Eds., ACS Symposium Series 819, American Chemical Society: Washington DC, 2002, 34-49.	101.325	333.15	1.65321	1.64967	-0.21413	1.50279	-9.09885
481	test	1-ethyl-3-methylimidazolium tetrafluoroborate	Izabela Stepniak, Ewa Andrzejewska, Highly conductive ionic liquid based ternary polymer electrolytes obtained by in situ photopolymerisation, Electrochimica Acta, 54 (2009) 5660-5665.	101.325	298.15	1.65418	1.96964	19.0709	1.76643	6.78634
482	training set	1-butylpyridinium tetrafluoroborate	B. Mokhtarani, A. Sharifi, H. R. Mortaheb, M. Mirzaei, M. Mafi and F. Sadeghian, J. Chem. Thermodyn, 2009, 41, 323-329.	101.325	323.15	1.65437	1.70982	3.35149	1.54263	-6.75432
483	training	1-ethyl-3-methylimidazolium tetrafluoroborate	Zhang, S.; Li, X.; Chen, H.; Wang, J.; Zhang, J.; Zhang, M.; Determination of Physical Properties for the Binary System of 1-ethyl-3-methylimidazolium tetrafluoroborate + H2O; J. Chem. Eng. Data, 49 760-764.	101.325	293.15	1.656	2.05464	24.0724	1.83975	11.0961
484	test set	1-butyl-3-methylimidazolium methylsulfate	A. Ferna´ndez, J. Garcı´a, J. S. Torrecilla,*M. Oliet, F. Rodrı´guez, J. Chem. Eng. Data, 2008, 53, 1518–1522	101.325	333.15	1.6561	1.77221	7.01087	1.48921	-10.0774
485	training set	1-butyl-3-methylimidazolium methylsulfate	E. Gómez, B. González, N. Calvar, E. Tojo and Á. Domínguez, J. Chem. Eng. Data, 2006, 51, 2096-2102.	101.325	328.15	1.65658	1.85721	12.1109	1.55403	-6.19033
486	training set	1-butyl-3-methylimidazolium nitrate	K. R. Seddon, A. S. Stark, M.J. Torres, M. Abraham, L. Moens, Eds., ACS Symposium Series 819, American Chemical Society: Washington DC, 2002, 34-49.	101.325	343.15	1.65706	1.85781	12.1148	1.59909	-3.49848
487	training set	1-butyl-3-methylimidazolium hexafluorophosphate	K. R. Harris, L. A. Woolf and M. Kanakubo, J. Chem. Eng. Data, 2005, 50, 1777-1782.	25700	343.15	1.65896	1.8536	11.7329	1.69121	1.94411
488	training	1-butyl-3-methylimidazolium bis(trifluoromethylsulfonyl)imide	Izabela Stepniak, Ewa Andrzejewska, Highly conductive ionic liquid based ternary polymer electrolytes obtained by in situ photopolymerisation, Electrochimica Acta, 54 (2009) 5660-5665.	101.325	298.15	1.65896	1.92203	15.8569	1.85662	11.9143
489	test set	1-butyl-3-methylimidazolium tetrafluoroborate	K. R. Harris, M. Kanakubo and L. A. Woolf, J. Chem. Eng. Data, 2007, 52, 2425-2430.	150600	348.15	1.65896	1.84228	11.0502	1.86919	12.6726
490	training set	1-octyl-3-methylimidazolium bis(trifluoromethylsulfonyl)amide	H. Tokuda, K. Hayamizu, K. Ishii, M. A. B. H. Susan and M. Watanabe, J. Phys. Chem. B, 2005, 109, 6103-6110.	101.325	313.15	1.66134	1.89452	14.0358	1.6424	-1.13988
491	training set	1-butyl-3-methyl imidazolium octylsulfate	P. Wasserscheid, R. van Hal and A. Bosmann, Green Chem., 2002, 4, 400-404.	101.325	353.1	1.66181	1.09007	-34.4045	1.81134	8.9981
492	training set	1-ethyl-3-methylimidazolium n-butylsulfate	A. J. L. Costa, J. M. S. S. Esperança, I. M. Marrucho and L. s. P. N. Rebelo, J. Chem. Eng. Data, 2011, 56, 3433-3441.	101.325	328.15	1.66181	1.60469	-3.43709	1.55062	-6.69063
493	training set	1-hexyl-3-methylimidazolium bi(trifluoromethylsulphonyl)imide	A. Muhammad, M. I. Abdul Mutalib, C. D. Wilfred, T. Murugesan and A. Shafeeq, J. Chem. Thermodyn., 2008, 40, 1433–1438.	101.325	308.2	1.66276	1.87847	12.9731	1.79749	8.10292
494	test set	1-hexyl-3-methylimidazolium iodide	M. H. Ghatee, M. Zare, F. Moosavi and A. R. Zolghadr, J. Chem. Eng. Data, 2010, 55, 3084-3088.	101.325	359.15	1.66464	1.61111	-3.21553	1.5823	-4.94621
495	test set	1-octyl-3-methylimidazolium bis(trifluoromethylsulfonyl)amide	H. Tokuda, S. Tsuzuki, M. A. B. H. Susan, K. Hayamizu and M. Watanabe, J. Phys. Chem. B, 2006, 110, 19593-19600.	101.325	313.1	1.66745	1.89537	13.6689	1.64407	-1.40188
496	training	1-butyl-3-methylimidazolium tetrafluoroborate	Zhou, Q.; Wang, L.-S.; Densities and Viscosities of 1-butyl-3-methylimidazolium tetrafluoroborate + H2O Binary Mixtures from (303.15 to 353.15) K; J. Chem. Eng. Data, 51 905-908.	101.325	313.15	1.66755	1.86237	11.6835	1.87981	12.7293
497	training	1-butyl-3-methylimidazolium bis(trifluoromethylsulfonyl)imide	O.O. Okoturo, T.J. VanderNoot, Temperature dependence of viscosity for room temperature ionic liquids, Journal of Electroanalytical Chemistry, 568 (2004) 167–181	101.325	298.15	1.6721	1.92203	14.947	1.85662	11.0353
498	test set	1-octyl-3-methylimidazolium iodide	M. H. Ghatee, M. Zare, F. Moosavi and A. R. Zolghadr, J. Chem. Eng. Data, 2010, 55, 3084-3088.	101.325	363.15	1.67468	1.64331	-1.87301	1.70345	1.71797
499	training set	1,3-dimethylimidazolium bis(trifluoromethylsulfonyl)imide	H. Tokuda, K. Hayamizu, K. Ishii, M. A. B. H. Susan and M. Watanabe, J. Phys. Chem. B, 2005, 109, 6103-6110.	101.325	293.15	1.67633	1.85543	10.684	1.72733	3.04208
500	test	Methyldiethylsulfonium dicyanoamide	Gerhard D, Alpaslan S C, Gores H J, et al. Trialkylsulfonium dicyanamides - a new family of ionic liquids with very low viscosities. Chem. Commun. 2005. 40, 5080-5082.	101.325	273.15	1.68034	2.36799	40.9237	1.84929	10.0547
501	training set	N-butyl-3-methylpyridinium tetrafluoroborate	J. M. Crosthwaite, M. J. Muldoon, J. N. K. Dixon, J. L. Anderson and J. F. Brennecke, J. Chem. Thermodyn, 2005, 37, 559-568.	101.325	315.65	1.68124	1.78979	6.45655	1.81318	7.84778
502	training	1-butyl-3-ethylimidazolium bis((trifluoromethyl)sulfonyl)imide	Berthod A, Ruiz-Angel M, Carda-Broch S. Ionic liquids in separation techniques. J. Chromatogr. A. 2008. 1184, 6-18.	101.325	298.15	1.68124	1.90788	13.4803	1.85309	10.2216
503	training	1-butyl-3-ethylimidazolium bis(trifluoromethylsulfonyl)imide	Pierre Bonhote,Ana-Paula Dias, Nicholas Papageorgiou, Kuppuswamy Kalyanasundaram, and Michael Gra1tzel,Hydrophobic, Highly Conductive Ambient-Temperature Molten Salts, Inorg. Chem. 35 (1996) 1168-1178.	101.325	293.15	1.68124	1.99288	18.5361	1.91196	13.723
504	test	1-butyl-3-ethylimidazolium bis((trifluoromethyl)sulfonyl)imide	Bonhote P, Dias A P, Papageorgiou N, et al. Hydrophobic, highly conductive ambient-temperature molten salts. Inorg. Chem. 1996. 35, 1168-1178.	101.325	293.15	1.68124	1.99288	18.5361	1.91196	13.723
505	training set	1-butylpyridinium bis(trifluoromethylsulfonyl)imide	H. Tokuda, S. Tsuzuki, M. A. B. H. Susan, K. Hayamizu and M. Watanabe, J. Phys. Chem. B, 2006, 110, 19593-19600.	101.325	303.1	1.68574	1.85532	10.0595	1.80636	7.1553
506	training set	1-butyl-3-methylimidazolium bis(trifluoromethylsulfonyl)imide	K. R. Harris, M. Kanakubo, L. A. Bis(trifluoromethylsulfonyl)imide. Woolf, J. Chem. Eng. Data, 2007, 52, 1080-1085.	200600	348.15	1.68664	1.83793	8.96994	1.89847	12.5593
507	training set	1-butyl-3-methylimidazolium hexafluorophosphate	K. R. Harris, L. A. Woolf and M. Kanakubo, J. Chem. Eng. Data, 2005, 50, 1777-1782.	100	333.15	1.6902	1.92581	13.9399	1.72255	1.91415
508	training	1-butyl-3-methylimidazolium hexafluoroantimony	O.O. Okoturo, T.J. VanderNoot, Temperature dependence of viscosity for room temperature ionic liquids, Journal of Electroanalytical Chemistry, 568 (2004) 167–181	101.325	323.15	1.6902	1.96271	16.1234	1.49309	-11.662
509	training	1-butyl-3-methylimidazolium bis(trifluoromethylsulfonyl)imide	Hui Jin, Bernie O’Hare, Jing Dong, Sergei Arzhantsev, Gary A. Baker, James F. Wishart,Alan J. Benesi, and Mark Maroncelli, Physical Properties of Ionic Liquids Consisting of the 1-butyl-3-Methylimidazolium Cation with Various Anions and the Bis(trifluoromethylsulfonyl)imide Anion with Various Cations, J. Phys. Chem. B, 112 (2008) 81-92.	101.325	298.15	1.6902	1.92203	13.7161	1.85662	9.84633
510	training set	1-butyl-3-methylimidazolium hexafluorophosphate	K. R. Harris, L. A. Woolf and M. Kanakubo, J. Chem. Eng. Data, 2005, 50, 1777-1782.	100	333.15	1.69197	1.92581	13.8207	1.72255	1.80754
511	test	1-propyl-3-methylimidazolium iodide	Philipp Wachter, Markus Zistler, Christian Schreiner, Matthias Fleischmann, Dirk Gerhard, Peter Wasserscheid,Joseph Barthel, and Heiner J. Gores, Temperature Dependence of the Non-Stokesian Charge Transport in Binary Blends of Ionic Liquids, J. Chem. Eng. Data, 54 (2009) 491-497.	101.325	353.15	1.69197	1.49175	-11.8333	1.36057	-19.5863
512	test set	Trimethyl(butyl)ammonium bis(trifluoromethylsulfonyl)imide	H. Tokuda, S. Tsuzuki, M. A. B. H. Susan, K. Hayamizu and M. Watanabe, J. Phys. Chem. B, 2006, 110, 19593-19600.	101.325	313.1	1.69285	1.63008	-3.7082	1.58965	-6.09606
513	training set	1-butyl-3-methylimidazolium octylsulfate	J. Jacquemin, P. Husson, V. Majer, A. A. H. Padua and M. F. C. Gomes, Green Chem., 2008, 10, 944-950.	101.325	352.98	1.69461	1.09211	-35.5538	1.81395	7.04212
514	training set	1-butyl-3-methylimidazolium hexafluorophosphate	K. R. Harris, L. A. Woolf and M. Kanakubo, J. Chem. Eng. Data, 2005, 50, 1777-1782.	100	333.15	1.69461	1.92581	13.6434	1.72255	1.64893
515	test set	1-butyl-3-methylimidazolium hexafluorophosphate	K. R. Harris, L. A. Woolf and M. Kanakubo, J. Chem. Eng. Data, 2005, 50, 1777-1782.	100	333.15	1.69461	1.92581	13.6434	1.72255	1.64893
516	training set	1-hexyl-3-methylimidazolium hexafluorophosphate	K. R. Harris, M. Kanakubo, L. A. Bis(trifluoromethylsulfonyl)imide. Woolf, J. Chem. Eng. Data, 2007, 52, 1080-1085.	100	343.15	1.69636	1.88311	11.0087	1.90748	12.4452
517	training set	1-hexyl-3-methylimidazolium hexafluorophosphate	K. R. Harris, M. Kanakubo, L. A. Bis(trifluoromethylsulfonyl)imide. Woolf, J. Chem. Eng. Data, 2007, 52, 1080-1085.	100	343.15	1.69636	1.88311	11.0087	1.90748	12.4452
518	training set	1-butyl-3-methylimidazolium hexafluorophosphate	K. R. Harris, L. A. Woolf and M. Kanakubo, J. Chem. Eng. Data, 2005, 50, 1777-1782.	100	333.15	1.6981	1.92581	13.4098	1.72255	1.44002
519	training set	1-butyl-1-methyl pyrrolidinium bis(trifluoromethylsulfonyl)imide	A. B. Pereiro, H. I. M. Veiga, J. M. S. S. Esperanca and A. Rodriguez, J. Chem. Thermodyn., 2009, 41, 1419–1423.	101.325	308.15	1.69845	1.7298	1.8459	1.7103	0.69775
520	training set	1-ethyl-3-methylimidazolium trifluromethane sulfonate	K. R. Seddon, A. S. Stark, M.J. Torres, M. Abraham, L. Moens, Eds., ACS Symposium Series 819, American Chemical Society: Washington DC, 2002, 34-49.	101.325	293.15	1.69897	1.77731	4.61074	1.90418	12.0785
521	training	1-butyl-3-methylimidazolium bis(trifluoromethylsulfonyl)imide	McFarlane, J.; Ridenour, W. B.; Luo, H.; Hunt, R. D.; DePaoli, D. W.; Room Temperature Ionic Liquids for Separating Organics from Produced Water ; Sep. Sci. Technol., 40 (6) 1245-1265.	101.325	295.1	1.69897	1.97388	16.1807	1.88987	11.2359
522	training set	1-ethyl-3-methylimidazolium ethylsulfate	E. Go´mez, B. Gonza´lez, N. Calvar, E. Tojo, A. Domı´nguez, J. Chem. Eng. Data, 2006, 51, 2096-2102	101.325	313.15	1.69906	1.97512	16.248	1.80315	6.12613
523	training	1-ethyl-3-methylimidazolium ethylsulfate	Gonzalez, E. J., Gonzales, B., Calvar, N., Dominguez, A., Physical Properties of Binary Mixtures of the Ionic Liquid 1-ethyl-3-methylimidazolium Ethyl Sulfate with Several Alcohols at T = (298.15, 313.15, and 328.15) K and Atmospheric Pressure, J. Chem. Eng. Data, 52 1641-1648.	101.325	313.15	1.69906	2.00604	18.0677	1.84947	8.853
524	training set	1-butyl-3-methylimidazolium hexafluorophosphate	W. Fan, Q. Zhou, J. Sun and S. J. Zhang, J. Chem. Eng. Data, 2009, 54, 2307-2311.	101.325	333.15	1.70224	1.92582	13.1343	1.72255	1.19333
525	training set	1-butyl-3-methylimidazolium tetrafluoroborate	D.Tomida, A.Kumagai, K.Qiao, C.Yokoyama, Int. J. Thermophys, 2006, 27, 39-47.	100	313.15	1.70329	1.86237	9.33951	1.87981	10.3637
526	training	1-butyl-3-methylimidazolium bis(trifluoromethylsulfonyl)imide	Glen McHale, Chris Hardacre, Rile Ge, Nicola Doy, Ray W. K.Allen, Jordan M. MacInnes, Mark R.Bown, and MichaelI. Newton, Density-Viscosity Product of Small-Volume Ionic Liquid Samples Using Quartz Crystal Impedance Analysis, Anal. Chem., 80 (2008) 5806-5811.	101.325	298.15	1.70329	1.92203	12.8419	1.85662	9.00181
527	training	1-ethyl-3-methylimidazolium ethylsulfate	Andreas P. Froba, Heiko Kremer, and Alfred Leipertz, Density, Refractive Index, Interfacial Tension, and Viscosity of Ionic Liquids [EMIM][EtSO4], [EMIM][NTf2], [EMIM][N(CN)2], and [OMA][NTf2] in Dependence on Temperature at Atmospheric Pressure, J. Phys. Chem. B, 112 (2008) 12420-12430.	101.325	313.15	1.70415	2.00604	17.7148	1.84947	8.52764
528	training set	1-octyl-3-methylimidazolium tetrafluoroborate	B. Mokhtarani, M. M. Mojtahedi, H. R. Mortaheb, M. Mafi, F. Yazdani and F. Sadeghian, J. Chem. Eng. Data, 2008, 53, 677-682.	101.325	338.15	1.70655	1.66487	-2.44235	1.77876	4.2311
529	training set	1-butyl-3-methyl-imidazolium bis(trifluoromethylsulfonyl)imide	K. R. Harris, M. Kanakubo, L. A. Bis(trifluoromethylsulfonyl)imide. Woolf, J. Chem. Eng. Data, 2007, 52, 1080-1085.	100	298.15	1.70672	1.92202	12.6149	1.85662	8.78283
530	training set	1-butyl-3-methylimidazolium iodide	M. H. Ghatee, M. Zare, F. Moosavi and A. R. Zolghadr, J. Chem. Eng. Data, 2010, 55, 3084-3088.	101.325	343.15	1.70697	1.75582	2.86162	1.60546	-5.94689
531	training set	1-butyl-3-methylimidazolium bis(trifluoromethylsulfonyl)imide	K. R. Harris, M. Kanakubo, L. A. Bis(trifluoromethylsulfonyl)imide. Woolf, J. Chem. Eng. Data, 2007, 52, 1080-1085.	100	298.15	1.70757	1.92202	12.5588	1.85662	8.72867
532	training set	1-butyl-3-methyl pyridinium bis((trifluoromethyl)sulfonyl)amide	J. M. Crosthwaite, M. J. Muldoon, J. N. K. Dixon, J. L. Anderson and J. F. Brennecke, J. Chem. Thermodyn, 2005, 37, 559-568.	101.325	303	1.70757	1.80949	5.96882	1.79293	4.99871
533	training set	1-dodecyl-3-methyl imidazolium hexafluorophosphate	K. R. Seddon, A. S. Stark, M.J. Torres, M. Abraham, L. Moens, Eds., ACS Symposium Series 819, American Chemical Society: Washington DC, 2002, 34-49.	101.325	363.15	1.70757	1.83152	7.25892	1.91978	12.4274
534	training set	1-butyl-3-methylimidazolium bis(trifluoromethylsulfonyl)imide	K. R. Harris, M. Kanakubo, L. A. Bis(trifluoromethylsulfonyl)imide. Woolf, J. Chem. Eng. Data, 2007, 52, 1080-1085.	100	298.15	1.70842	1.92202	12.5028	1.85662	8.67458
535	training set	1-ethyl-3-methylimidazolium n-octylsulfate	B. Hasse, J. Lehmann, D. Assenbaum, P. Wasserscheid, A. Leipertz and A. P. Fröba, J. Chem. Eng. Data ,2009, 54, 2576-2583.	101.325	348.15	1.70842	1.02649	-39.9158	1.88877	10.5563
536	training set	1-decyl-3-methylimidazolium bis(trifluoromethylsulfonyl)imide	A. Ahosseini and A. M. Scurto, Int. J. Thermophys, 2008, 29, 1222-1243.	109800	343.15	1.70978	1.89524	10.8469	1.91945	12.2631
537	training set	1-octyl-3-methylimidazolium tetrafluoroborate	K. R. Harris, M. Kanakubo and L. A. Woolf, J. Chem. Eng. Data, 2006, 51, 1161-1167.	50300	348.15	1.71181	1.68663	-1.47102	1.83169	7.00302
538	training	1-hexyl-3-methylimidazolium bis(trifluoromethylsulfonyl)imide	Kenneth N. Marsh, Joan F. Brennecke, Robert D. Chirico，Michael Frenkel, Andreas Heintz, Joseph W. Magee, Cor J. Peters, Luis Paulo N. Rebelo, and Kenneth R. Seddon，Thermodynamic and thermophysical properties of the reference ionic liquid: 1-hexyl-3-methylimidazolium bis[(trifluoromethyl)sulfonyl]amide (including mixtures),Pure Appl. Chem., 2009 Vol.81 No.5 781-790.	101.325	303.15	1.71265	1.96432	14.6949	1.92404	12.343
539	training set	1-butyl-3-methylimidazolium thiocyanate	U. Domańska and M. Laskowska, J. Chem. Eng. Data, 2009, 54, 2113-2119.	101.325	298.15	1.71349	2.37269	38.4712	1.92533	12.3631
540	training set	1-butyl-3-methylimidazolium trifluoromethylsulfonate	M. L. Ge, R. S. Zhao, Y. F. Yi, Q. Zhang and L. S. Wang, J. Chem. Eng. Data, 2008, 53, 2408-2411.	101.325	308.15	1.71373	1.67004	-2.54958	1.91189	11.563
541	training set	1-ethyl-3-methylimidazolium methylsulfate	A. J. L. Costa, J. M. S. S. Esperança, I. M. Marrucho and L. s. P. N. Rebelo, J. Chem. Eng. Data, 2011, 56, 3433-3441.	101.325	308.15	1.71433	2.04948	19.5496	1.87591	9.42519
542	test	1-butyl-3-methylimidazolium bis(trifluoromethylsulfonyl)imide	Y. Franc¸ ois, K. Zhang , A. Varenne, P. Gareil, New integrated measurement protocol using capillary electrophoresis instrumentation for the determination of viscosity, conductivity and absorbance of ionic liquid–molecular solvent mixtures, Analytica Chimica Acta, 562 (2006) 164-170.	101.325	298.15	1.71517	1.92203	12.0605	1.85662	8.24707
543	training set	1-ethyl-3-methylimidazolium bis(trifluoromethylsulfonyl)amide	J. M. Crosthwaite, M. J. Muldoon, J. N. K. Dixon, J. L. Anderson and J. F. Brennecke, J. Chem. Thermodyn, 2005, 37, 559-568.	101.325	283	1.716	2.03184	18.4058	1.92818	12.3649
544	training	1-butyl-3-methylimidazolium bis ((trifluoromethyl)sulfonyl)imide	Deng M J, Chen P Y, Leong T I, et al. Dicyanamide anion based ionic liquids for electrodeposition of metals. Electrochem. Commun. 2008. 10, 213-216.	101.325	293.15	1.716	2.00703	16.9593	1.91433	11.5576
545	training	1-butyl-3-methylimidazolium bis ((trifluoromethyl)sulfonyl)imide	Carda-Broch S, Berthod A, Armstrong D W. Solvent properties of the 1-butyl-3-methylimidazolium hexafluorophosphate ionic liquid. Anal. Bioanal. Chem. 2003. 375, 191-199.	101.325	293.15	1.716	2.00703	16.9593	1.91433	11.5576
546	training	1-butyl-3-methylimidazolium bis(trifluoromethylsulfonyl)imide	McFarlane, J.; Ridenour, W. B.; Luo, H.; Hunt, R. D.; DePaoli, D. W.; Room Temperature Ionic Liquids for Separating Organics from Produced Water ; Sep. Sci. Technol., 40 (6) 1245-1265.	101.325	296.1	1.716	1.95688	14.0368	1.87854	9.47201
547	training	1-butyl-3-methylimidazolium bis(trifluoromethylsulfonyl)imide	Hélène Olivier-Bourbigou, Lionel Magna, Ionic liquids: perspectives for organic and catalytic reactions, Journal of Molecular Catalysis A: Chemical, 182 (2002) 419-437	101.325	293.15	1.716	2.00703	16.9593	1.91433	11.5576
548	training	1-butyl-3-methylimidazolium trifluoromethanesulfonate	O.O. Okoturo, T.J. VanderNoot, Temperature dependence of viscosity for room temperature ionic liquids, Journal of Electroanalytical Chemistry, 568 (2004) 167–181	101.325	308.15	1.716	1.67004	-2.67868	1.91189	11.4152
549	test	1-butyl-3-methylimidazolium bis(trifluoromethylsulfonyl)imide	Quan Gan, David Rooney, Minliang Xue, Gillian Thompson, Yiran Zou, An experimental study of gas transport and separation properties of ionic liquids supported on nanofiltration membranes, Journal of Membrane Science, 280 (2006) 948-956.	101.325	293.15	1.716	2.00703	16.9593	1.91433	11.5576
550	test	1-butyl-3-methylimidazolium bis(trifluoromethylsulfonyl)imide	Pierre Bonhote,Ana-Paula Dias, Nicholas Papageorgiou, Kuppuswamy Kalyanasundaram, and Michael Gra1tzel,Hydrophobic, Highly Conductive Ambient-Temperature Molten Salts, Inorg. Chem. 35 (1996) 1168-1178.	101.325	293.15	1.716	2.00703	16.9593	1.91433	11.5576
551	test	1-butyl-3-methylimidazolium bis ((trifluoromethyl)sulfonyl)imide	Gan Q, Rooney D, Xue M, et al. An experimental study of gas transport and separation properties of ionic liquids supported on nanofiltration membranes. J. Membr. Sci. 2006. 280, 948-956.	101.325	293.15	1.716	2.00703	16.9593	1.91433	11.5576
552	training	1-ethyl-3-methylimidazolium dicyanamide	Andreas P. Froba, Heiko Kremer, and Alfred Leipertz, Density, Refractive Index, Interfacial Tension, and Viscosity of Ionic Liquids [EMIM][EtSO4], [EMIM][NTf2], [EMIM][N(CN)2], and [OMA][NTf2] in Dependence on Temperature at Atmospheric Pressure, J. Phys. Chem. B, 112 (2008) 12420-12430.	101.325	273.15	1.71684	2.38069	38.6673	1.88665	9.89114
553	training set	1-butyl-3-methylimidazolium hexafluorophosphate	D.Tomida, A.Kumagai, K.Qiao, C.Yokoyama, Int. J. Thermophys, 2006, 27, 39-47.	100	333.15	1.72016	1.92581	11.9554	1.72255	0.13912
554	test set	1-butyl-3-methylimidazolium tetrafluoroborate	D.Tomida, A.Kumagai, K.Qiao, C.Yokoyama, Int. J. Thermophys, 2006, 27, 39-47.	5000	313.15	1.72181	1.88109	9.25056	1.88355	9.39372
555	training set	1-butyl-3-methylimidazolium trifluoroacetate	J. M. Crosthwaite, M. J. Muldoon, J. N. K. Dixon, J. L. Anderson and J. F. Brennecke, J. Chem. Thermodyn, 2005, 37, 559-568.	101.325	303	1.72428	1.87896	8.97065	1.93597	12.2769
556	training set	1-ethyl-3-methyl imidazolium hydrogen sulfate	A. J. L. Costa, J. M. S. S. Esperança, I. M. Marrucho and L. s. P. N. Rebelo, J. Chem. Eng. Data, 2011, 56, 3433-3441.	101.325	373.15	1.72754	1.81529	5.07965	1.93971	12.2818
557	training set	1-butyl-3-methylimidazolium tetrafluoroborate	K. R. Harris, M. Kanakubo and L. A. Woolf, J. Chem. Eng. Data, 2007, 52, 2425-2430.	175600	348.15	1.72754	1.93778	12.1699	1.9397	12.2809
558	training set	1-butyl-3-methylimidazolium tetrafluoroborate	K. R. Harris, M. Kanakubo and L. A. Woolf, J. Chem. Eng. Data, 2007, 52, 2425-2430.	100	313.15	1.72835	1.86237	7.75416	1.87981	8.76347
559	training set	1-butyl-3-methylimidazolium tetrafluoroborate	K. R. Harris, M. Kanakubo and L. A. Woolf, J. Chem. Eng. Data, 2007, 52, 2425-2430.	100	313.15	1.72916	1.86237	7.70368	1.87981	8.71253
560	test set	1-decyl-3-methylimidazolium bis(trifluoromethylsulfonyl)imide	A. Ahosseini and A. M. Scurto, Int. J. Thermophys, 2008, 29, 1222-1243.	34600	323.15	1.72916	1.94797	12.6544	1.55948	-9.81292
561	training set	1-hexyl-3-methylimidazolium bi(trifluoromethylsulphonyl)imide	H. Tokuda, K. Hayamizu, K. Ishii, M. A. B. H. Susan and M. Watanabe, J. Phys. Chem. B, 2005, 109, 6103-6110.	101.325	303.15	1.73014	1.96432	13.5354	1.92404	11.2073
562	test set	1-butyl-3-methyl-imidazolium bis(trifluoromethylsulfonyl)imide	K. R. Harris, M. Kanakubo, L. A. Bis(trifluoromethylsulfonyl)imide. Woolf, J. Chem. Eng. Data, 2007, 52, 1080-1085.	101600	323.15	1.73159	1.88475	8.84509	1.91716	10.7166
563	test set	1-hexyl-3-methylimidazolium tetrafluoroborate	Y. A. Sanmamed, D. Gonzalez-Salgado, J. Troncoso, C. A. Cerdeirina and L. Romani, Fluid Phase Equilibria, 2007, 252, 96-102.	101.325	323.15	1.73159	1.81967	5.08666	1.621	-6.3865
564	training set	1-hexyl-3-methylimidazolium hexafluorophosphate	K. R. Seddon, A. S. Stark, M.J. Torres, M. Abraham, L. Moens, Eds., ACS Symposium Series 819, American Chemical Society: Washington DC, 2002, 34-49.	101.325	343.15	1.73239	1.88311	8.7003	1.90748	10.1066
565	training	1-(2-methoxyethyl)-3-methylimidazolium bis(trifluoromethylsulfonyl)imide	Pierre Bonhote,Ana-Paula Dias, Nicholas Papageorgiou, Kuppuswamy Kalyanasundaram, and Michael Gra1tzel,Hydrophobic, Highly Conductive Ambient-Temperature Molten Salts, Inorg. Chem. 35 (1996) 1168-1178.	101.325	293.15	1.73239	1.88944	9.06524	1.83466	5.90336
566	test	1-(2-methoxyethyl)-3-methylimidazolium bis((trifluoromethyl)sulfonyl)imide	Bonhote P, Dias A P, Papageorgiou N, et al. Hydrophobic, highly conductive ambient-temperature molten salts. Inorg. Chem. 1996. 35, 1168-1178.	101.325	293.15	1.73239	1.88944	9.06524	1.83466	5.90336
567	training set	1-butyl-3-methylimidazolium nitrate	K. R. Seddon, A. S. Stark, M.J. Torres, M. Abraham, L. Moens, Eds., ACS Symposium Series 819, American Chemical Society: Washington DC, 2002, 34-49.	101.325	323.15	1.7332	2.07051	19.4619	1.58232	-8.70508
568	training set	1-butyl-3-methylimidazolium bis((trifluoromethyl)sulfonyl)amide	K. R. Harris, M. Kanakubo, L. A. Bis(trifluoromethylsulfonyl)imide. Woolf, J. Chem. Eng. Data, 2007, 52, 1080-1085.	103600	323.15	1.7356	1.89239	9.0338	1.92353	10.8281
569	training	1-butyl-3-methylimidazolium bis ((trifluoromethyl)sulfonyl)imide	Wu B, Reddy R G, Rogers R D. Novel ionic liquid thermal storge for solar thermal electric power system.Proceedings of solar forum, solar energy: the power to choose. Washington, DC. 2001.	101.325	298.15	1.7364	1.92203	10.6905	1.85662	6.92365
570	training	1-butyl-3-methylimidazolium bis(trifluoromethylsulfonyl)imide	Wu B.Q., Reddy R. G., Rogers R.D. Proceedings of Solar Forum, Solar Energy: The power to Choose April 21-25, 2001, Washington, DC	101.325	298.15	1.7364	1.92203	10.6905	1.85662	6.92365
571	training	1-butyl-3-methylimidazolium methylsulfate	Ramesh L. Gardas, Joao A.P. Coutinho, A group contribution method for viscosity estimation of ionic liquids, Fluid Phase Equilibria, 266 (2008) 195-201.	101.325	323.15	1.73799	1.94221	11.7504	1.62474	-6.51583
572	test set	1-butyl-3-methylimidazolium nitrate	B. Mokhtarani, A. Sharifi, H. R. Mortaheb, M. Mirzaei, M. Mafi and F. Sadeghian, J. Chem. Thermodyn, 2009, 41, 1432-1438.	101.325	318.15	1.7387	2.15551	23.9727	1.67562	-3.62791
573	training set	1-hexyl-3-methylimidazolium bi(trifluoromethylsulphonyl)imide	J. M. Crosthwaite, M. J. Muldoon, J. N. K. Dixon, J. L. Anderson and J. F. Brennecke, J. Chem. Thermodyn, 2005, 37, 559-568.	101.325	303	1.74036	1.96687	13.0152	1.92736	10.7446
574	training set	1-butyl-3-methylimidazolium tetrafluoroborate	D.Tomida, A.Kumagai, K.Qiao, C.Yokoyama, Int. J. Thermophys, 2006, 27, 39-47.	10000	313.15	1.74115	1.90019	9.13402	1.89214	8.6716
575	test set	1-butyl-3-methyl imidazolium bis(pentafluoroethylsulfonyl)imide	H. Tokuda, S. Tsuzuki, M. A. B. H. Susan, K. Hayamizu and M. Watanabe, J. Phys. Chem. B, 2006, 110, 19593-19600.	101.325	313.1	1.74115	1.58284	-9.09229	1.70807	-1.90011
576	training set	1-butyl-3-methylimidazolium hexafluorophosphate	D.Tomida, A.Kumagai, K.Qiao, C.Yokoyama, Int. J. Thermophys, 2006, 27, 39-47.	5000	333.15	1.74273	1.94453	11.5795	1.72714	-0.89446
577	training set	1-ethyl-3-methylimidazolium tetrafluoroborate	E. Rilo, J. Vila, J. Pico, S. Garcia-Garabal, L. Segade, L. M. Varela and O. Cabeza, J. Chem. Eng. Data, 55, 639-644.	101.325	288.15	1.74421	2.13964	22.6711	1.97383	13.1647
578	training set	1-butyl-3-methylimidazolium tetrafluoroborate	K. R. Harris, M. Kanakubo and L. A. Woolf, J. Chem. Eng. Data, 2007, 52, 2425-2430.	50493	323.15	1.74429	1.88487	8.05945	1.8115	3.85306
579	test set	1-ethyl-3-methylimidazolium n-butylsulfate	A. J. L. Costa, J. M. S. S. Esperança, I. M. Marrucho and L. s. P. N. Rebelo, J. Chem. Eng. Data, 2011, 56, 3433-3441.	101.325	323.15	1.74507	1.68969	-3.17339	1.58996	-8.88835
580	training set	1-octyl-3-methylimidazolium iodide	M. H. Ghatee, M. Zare, F. Moosavi and A. R. Zolghadr, J. Chem. Eng. Data, 2010, 55, 3084-3088.	101.325	358.15	1.7457	1.72831	-0.99599	1.80988	3.67628
581	training set	1-hexyl-3-methylimidazolium bis(trifluoromethylsulfonyl)imide	H. Tokuda, S. Tsuzuki, M. A. B. H. Susan, K. Hayamizu and M. Watanabe, J. Phys. Chem. B, 2006, 110, 19593-19600.	101.325	303.1	1.74586	1.96517	12.5618	1.92515	10.2694
582	test	Ethyldimethylsulfonium dicyanoamide	Gerhard D, Alpaslan S C, Gores H J, et al. Trialkylsulfonium dicyanamides - a new family of ionic liquids with very low viscosities. Chem. Commun. 2005. 40, 5080-5082.	101.325	273.15	1.74586	2.36761	35.6134	1.84821	5.86249
583	training set	1-butyl-3-methylimidazolium hexafluorophosphate	K. R. Harris, L. A. Woolf and M. Kanakubo, J. Chem. Eng. Data, 2005, 50, 1777-1782.	10700	333.15	1.74663	1.9663	12.577	1.74027	-0.36428
584	training set	1-butylpyridinium tetrafluoroborate	B. Mokhtarani, A. Sharifi, H. R. Mortaheb, M. Mirzaei, M. Mafi and F. Sadeghian, J. Chem. Thermodyn, 2009, 41, 323-329.	101.325	318.15	1.74671	1.79482	2.7541	1.70611	-2.32428
585	training set	1-octyl-3-methylpyridinium bis(trifluoromethylsulfonyl)imide	J. M. Crosthwaite, M. J. Muldoon, J. N. K. Dixon, J. L. Anderson and J. F. Brennecke, J. Chem. Thermodyn, 2005, 37, 559-568.	101.325	313	1.74819	1.87535	7.27391	1.66112	-4.98085
586	training	1-butyl-3-methylimidazolium tetrafluoroborate	O.O. Okoturo, T.J. VanderNoot, Temperature dependence of viscosity for room temperature ionic liquids, Journal of Electroanalytical Chemistry, 568 (2004) 167–181	101.325	313.15	1.74819	1.86237	6.53168	1.87981	7.52927
587	training	1-hexyl-3-methylimidazolium bis(trifluoromethylsulfonyl)imide	Jason A. Widegren and Joseph W. Magee, Density, Viscosity, Speed of Sound, and Electrolytic Conductivity for the Ionic Liquid 1-hexyl-3-methylimidazolium Bis(trifluoromethylsulfonyl)imide and Its Mixtures with Water, J. Chem. Eng. Data, 52 (2007) 2331-2338.	101.325	303.15	1.74904	1.96432	12.3086	1.92404	10.0056
588	training	1-propyl-3-methylimidazolium bis(trifluoromethylsulfonyl)imide	Riccardo Binia, Marco Malvaldia, William R. Pitnerb and Cinzia Chiappea,QSPR correlation for conductivities and viscosities of low-temperature melting ionic liquids, J. Phys. Org. Chem., 21 (2008) 622-629.	101.325	293	1.75129	1.91551	9.37668	1.87927	7.30747
589	training set	1-decyl-3-methylimidazolium bis(trifluoromethylsulfonyl)imide	A. Ahosseini and A. M. Scurto, Int. J. Thermophys, 2008, 29, 1222-1243.	122570	343.15	1.75389	1.94402	10.8405	1.96237	11.8865
590	test set	1-butyl-3-methylimidazolium bis(trifluoromethylsulfonyl)imide	K. R. Harris, M. Kanakubo, L. A. Bis(trifluoromethylsulfonyl)imide. Woolf, J. Chem. Eng. Data, 2007, 52, 1080-1085.	225400	348.15	1.75891	1.93267	9.87866	1.97667	12.3803
591	training set	1-butyl-3-methylimidazolium tetrafluoroborate	D.Tomida, A.Kumagai, K.Qiao, C.Yokoyama, Int. J. Thermophys, 2006, 27, 39-47.	15000	313.15	1.75967	1.91929	9.07085	1.90541	8.28226
592	test	1-butyl-3-methylimidazolium bis(trifluoromethylsulfonyl)imide	Russell G. Evans , Oleksiy V. Klymenko , Christopher Hardacre ,Kenneth R. Seddon , Richard G. Compton,Oxidation of N,N,N',N'-tetraalkyl-para-phenylenediamines in a series of room temperature ionic liquids incorporating the bis(trifluoromethylsulfonyl)imide anion,Journal of Electroanalytical Chemistry, 556 (2003) 179-188.	101.325	293.15	1.76042	2.00703	14.0082	1.91433	8.74276
593	test set	1-hexyl-3-methylimidazolium iodide	M. H. Ghatee, M. Zare, F. Moosavi and A. R. Zolghadr, J. Chem. Eng. Data, 2010, 55, 3084-3088.	101.325	353.15	1.76185	1.71311	-2.76624	1.71238	-2.80771
594	training set	1-octyl-3-methylimidazolium tetrafluoroborate	K. R. Harris, M. Kanakubo and L. A. Woolf, J. Chem. Eng. Data, 2006, 51, 1161-1167.	100	333.15	1.76193	1.74986	-0.68476	1.80466	2.42546
595	training set	1-octyl-3-methylimidazolium tetrafluoroborate	K. R. Harris, M. Kanakubo and L. A. Woolf, J. Chem. Eng. Data, 2006, 51, 1161-1167.	100	333.15	1.76193	1.74986	-0.68476	1.80466	2.42546
596	training	1-butyl-3-methylimidazolium bis(trifluoromethylsulfonyl)imide	O.O. Okoturo, T.J. VanderNoot, Temperature dependence of viscosity for room temperature ionic liquids, Journal of Electroanalytical Chemistry, 568 (2004) 167–181	101.325	293.15	1.76343	2.00703	13.8139	1.91433	8.55742
597	test set	1-butyl-3-methylimidazolium hexafluorophosphate	K. R. Harris, L. A. Woolf and M. Kanakubo, J. Chem. Eng. Data, 2005, 50, 1777-1782.	50600	343.15	1.76343	1.94872	10.5075	1.88027	6.62548
598	test set	1-octyl-3-methylimidazolium tetrafluoroborate	K. R. Seddon, A. S. Stark, M.J. Torres, M. Abraham, L. Moens, Eds., ACS Symposium Series 819, American Chemical Society: Washington DC, 2002, 34-49.	101.325	333.1	1.76343	1.75072	-0.72075	1.80495	2.35424
599	training	1-butyl-3-methylimidazolium tetrafluoroborate	Zhou, Q.; Wang, L.-S.; Densities and Viscosities of 1-butyl-3-methylimidazolium tetrafluoroborate + H2O Binary Mixtures from (303.15 to 353.15) K; J. Chem. Eng. Data, 51 905-908.	101.325	308.15	1.76477	1.94737	10.347	2.00418	13.5661
600	training set	1-butyl-3-methylimidazolium hexafluorophosphate	D.Tomida, A.Kumagai, K.Qiao, C.Yokoyama, Int. J. Thermophys, 2006, 27, 39-47.	10000	333.15	1.76492	1.96363	11.2589	1.73822	-1.51307
601	training set	1-butyl-3-methylimidazolium trifluoroacetate	H. Tokuda, K. Hayamizu, K. Ishii, Md. A. B. H. Susan, M. Watanabe, J. Phys. Chem. B, 2004, 108, 16593-16600.	101.325	303.1	1.76567	1.87726	6.31993	1.93454	9.56433
602	training set	1,3-dimethylimidazolium methylsulfate	A. B. Pereiro, F. Santamarta, E. Tojo, A. Rodrı´guez, J. Tojo, J. Chem. Eng. Data, 2006, 51, 952-954	101.325	303.15	1.76604	2.13061	20.6434	1.97823	12.015
603	training	1-(2-methoxyethyl)-3-methylimidazolium bis(trifluoromethylsulfonyl)imide	Riccardo Binia, Marco Malvaldia, William R. Pitnerb and Cinzia Chiappea,QSPR correlation for conductivities and viscosities of low-temperature melting ionic liquids, J. Phys. Org. Chem., 21 (2008) 622-629.	101.325	293	1.77024	1.89199	6.87753	1.8367	3.75435
604	training	1-butyl-3-methylimidazolium hexafluorophosphate	O.O. Okoturo, T.J. VanderNoot, Temperature dependence of viscosity for room temperature ionic liquids, Journal of Electroanalytical Chemistry, 568 (2004) 167–181	101.325	333.15	1.77085	1.92582	8.75088	1.72255	-2.72742
605	training set	1-butyl-3-methylimidazolium tetrafluoroborate	K. R. Seddon, A. S. Stark, M.J. Torres, M. Abraham, L. Moens, Eds., ACS Symposium Series 819, American Chemical Society: Washington DC, 2002, 34-49.	101.325	313.15	1.77159	1.86237	5.12444	1.87981	6.10886
606	training set	1-butyl-1-methyl pyrrolidinium bis(trifluoromethylsulfonyl)imide	H. Tokuda, S. Tsuzuki, M. A. B. H. Susan, K. Hayamizu and M. Watanabe, J. Phys. Chem. B, 2006, 110, 19593-19600.	101.325	303.1	1.77452	1.81565	2.31791	1.79359	1.07443
607	training set	1-butyl pyridinium bis((trifluoromethyl)sulfonyl)amide	H. Tokuda, S. Tsuzuki, M. A. B. H. Susan, K. Hayamizu and M. Watanabe, J. Phys. Chem. B, 2006, 110, 19593-19600.	101.325	298.1	1.77815	1.94032	9.12003	1.86438	4.84944
608	training set	1-butyl-3-methylimidazolium tetrafluoroborate	D.Tomida, A.Kumagai, K.Qiao, C.Yokoyama, Int. J. Thermophys, 2006, 27, 39-47.	20000	313.15	1.77815	1.93839	9.01144	1.92312	8.15285
609	training	1-ethyl-3-methylimidazolium bis(trifluoromethylsulfonyl)imide	Andreas P. Froba, Heiko Kremer, and Alfred Leipertz, Density, Refractive Index, Interfacial Tension, and Viscosity of Ionic Liquids [EMIM][EtSO4], [EMIM][NTf2], [EMIM][N(CN)2], and [OMA][NTf2] in Dependence on Temperature at Atmospheric Pressure, J. Phys. Chem. B, 112 (2008) 12420-12430.	101.325	283.15	1.77887	2.02929	14.0774	1.92436	8.17835
610	test set	1-octyl-3-methylimidazolium tetrafluoroborate	B. Mokhtarani, M. M. Mojtahedi, H. R. Mortaheb, M. Mafi, F. Yazdani and F. Sadeghian, J. Chem. Eng. Data, 2008, 53, 677-682.	101.325	333.15	1.78497	1.74987	-1.96642	1.80466	1.10333
611	training set	1-butyl-3-methylimidazolium hexafluorophosphate	D.Tomida, A.Kumagai, K.Qiao, C.Yokoyama, Int. J. Thermophys, 2006, 27, 39-47.	15000	333.15	1.78533	1.98273	11.0568	1.75546	-1.67313
612	training	1-butyl-3-methylimidazolium trifluoromethanesulfonate	O.O. Okoturo, T.J. VanderNoot, Temperature dependence of viscosity for room temperature ionic liquids, Journal of Electroanalytical Chemistry, 568 (2004) 167–181	101.325	303.15	1.78533	1.75504	-1.69676	1.99285	11.6234
613	test set	1-ethyl-3-methylimidazolium trifluoromethylsulfonate	H. Rodriguez, J. F. Brennecke, J. Chem. Eng. Data, 2006, 51, 2145-2155.	101.325	288.15	1.78533	1.86231	4.31153	1.98988	11.4574
614	training set	1-ethyl-3-methyl imidazolium chloride	K. R. Seddon, A. S. Stark, M.J. Torres, M. Abraham, L. Moens, Eds., ACS Symposium Series 819, American Chemical Society: Washington DC, 2002, 34-49.	101.325	353.15	1.78675	2.32757	30.2685	1.94763	9.00391
615	training set	1-ethyl-3-methylimidazolium bis(trifluoromethylsulfonyl)amide	H. Tokuda, K. Hayamizu, K. Ishii, M. A. B. H. Susan and M. Watanabe, J. Phys. Chem. B, 2005, 109, 6103-6110.	101.325	283.15	1.78746	2.02929	13.5295	1.92436	7.65875
616	training set	1-butyl-3-methylimidazolium hexafluorophosphate	W. Fan, Q. Zhou, J. Sun and S. J. Zhang, J. Chem. Eng. Data, 2009, 54, 2307-2311.	101.325	328.15	1.78773	2.01082	12.4788	1.79053	0.15678
617	training set	1-ethyl-3-methylimidazolium n-octylsulfate	B. Hasse, J. Lehmann, D. Assenbaum, P. Wasserscheid, A. Leipertz and A. P. Fröba, J. Chem. Eng. Data ,2009, 54, 2576-2583.	101.325	343.15	1.78817	1.11149	-37.842	1.95088	9.09913
618	training set	1-butyl-1-methyl pyrrolidinium bis(trifluoromethylsulfonyl)imide	A. B. Pereiro, H. I. M. Veiga, J. M. S. S. Esperanca and A. Rodriguez, J. Chem. Thermodyn., 2009, 41, 1419–1423.	101.325	303.15	1.78866	1.8148	1.46153	1.79291	0.23759
619	training set	1-ethyl-3-methyl-imidazolium ethylsulfate	E. Go´mez, B. Gonza´lez, N. Calvar, E. Tojo, A. Domı´nguez, J. Chem. Eng. Data, 2006, 51, 2096-2102	101.325	308.15	1.79036	2.06012	15.0675	1.90513	6.41049
620	training set	1-decyl-3-methylimidazolium bis(trifluoromethylsulfonyl)imide	A. Ahosseini and A. M. Scurto, Int. J. Thermophys, 2008, 29, 1222-1243.	47960	323.15	1.79099	1.99901	11.6148	1.69116	-5.57382
621	training set	1-ethyl-3-methyl imidazolium hydrogen sulfate	A. J. L. Costa, J. M. S. S. Esperança, I. M. Marrucho and L. s. P. N. Rebelo, J. Chem. Eng. Data, 2011, 56, 3433-3441.	101.325	368.15	1.79169	1.90029	6.06149	1.9486	8.75788
622	training set	1-ethyl-3-methyl-imidazolium ethylsulfate	H. Rodriguez, J. F. Brennecke, J. Chem. Eng. Data, 2006, 51, 2145-2155.	101.325	308.15	1.79239	2.06012	14.9372	1.90513	6.28997
623	training set	1-butyl-3-methyl imidazolium acetate	J. M. Crosthwaite, M. J. Muldoon, J. N. K. Dixon, J. L. Anderson and J. F. Brennecke, J. Chem. Thermodyn, 2005, 37, 559-568.	101.325	333	1.79239	2.24654	25.3378	2.00479	11.85
624	training set	1-butyl-3-methylimidazolium methylsulfate	A. B.Pereiro, P. Verdía, E. Tojo, A. Rodríguez, J. Chem. Eng. Data, 2007, 52, (2), 377-380.	101.325	323.15	1.79393	1.94221	8.26549	1.62474	-9.43108
625	training set	1-butyl-3-methylimidazolium tetrafluoroborate	K. R. Harris, M. Kanakubo and L. A. Woolf, J. Chem. Eng. Data, 2007, 52, 2425-2430.	200600	348.15	1.79449	2.03328	13.3068	2.00559	11.7638
626	training set	1-butyl-3-methylimidazolium bis(trifluoromethylsulfonyl)imide	H. Tokuda, K. Hayamizu, K. Ishii, M. A. B. H. Susan and M. Watanabe, J. Phys. Chem. B, 2005, 109, 6103-6110.	101.325	293.15	1.79685	2.00703	11.6969	1.91433	6.53822
627	test	1-butyl-3-methylimidazolium hexafluorophosphate	K. S. Mali, G. B. Dutt, and T. Mukherjee, Photoisomerization of cyanine derivatives in 1-butyl-3-methylimidazolium hexafluorophosphate and aqueous glycerol: Influence of specific interactions, J. Chem. Phys., 128 (2008) 124515.	101.325	323	1.79727	2.09837	16.7532	1.89055	5.19009
628	training set	1-butyl-3-methylimidazolium iodide	M. H. Ghatee, M. Zare, F. Moosavi and A. R. Zolghadr, J. Chem. Eng. Data, 2010, 55, 3084-3088.	101.325	338.15	1.79775	1.84082	2.39561	1.66648	-7.30202
629	training set	1-butyl-3-methyl pyridinium bis((trifluoromethyl)sulfonyl)amide	J. M. Crosthwaite, M. J. Muldoon, J. N. K. Dixon, J. L. Anderson and J. F. Brennecke, J. Chem. Thermodyn, 2005, 37, 559-568.	101.325	298	1.79934	1.89449	5.28815	1.85191	2.92147
630	training set	1-hexyl-2,3-dimethylimidazolium bis(trifluoromethylsulfonyl)imide	J. M. Crosthwaite, M. J. Muldoon, J. N. K. Dixon, J. L. Anderson and J. F. Brennecke, J. Chem. Thermodyn, 2005, 37, 559-568.	101.325	313	1.79934	1.81769	1.01991	1.6662	-7.39911
631	test set	1-octyl-3-methylimidazolium hexafluorophosphate	K. R. Seddon, A. S. Stark, M.J. Torres, M. Abraham, L. Moens, Eds., ACS Symposium Series 819, American Chemical Society: Washington DC, 2002, 34-49.	101.325	343.15	1.79934	1.98331	10.2245	2.04909	13.8802
632	training set	1-butyl-3-methylimidazolium trifluoromethylsulfonate	M. L. Ge, R. S. Zhao, Y. F. Yi, Q. Zhang and L. S. Wang, J. Chem. Eng. Data, 2008, 53, 2408-2411.	101.325	303.15	1.80065	1.75504	-2.53314	1.99285	10.6737
633	training set	1-butyl-3-methylimidazolium hexafluorophosphate	D.Tomida, A.Kumagai, K.Qiao, C.Yokoyama, Int. J. Thermophys, 2006, 27, 39-47.	20000	333.15	1.80072	2.00183	11.1683	1.77839	-1.24009
634	training set	1-ethyl-3-methylimidazolium methylsulfate	A. J. L. Costa, J. M. S. S. Esperança, I. M. Marrucho and L. s. P. N. Rebelo, J. Chem. Eng. Data, 2011, 56, 3433-3441.	101.325	303.15	1.80209	2.13448	18.4444	1.97521	9.6068
635	training	1-butyl-3-methylimidazolium bis(trifluoromethylsulfonyl)imide	Riccardo Binia, Marco Malvaldia, William R. Pitnerb and Cinzia Chiappea,QSPR correlation for conductivities and viscosities of low-temperature melting ionic liquids, J. Phys. Org. Chem., 21 (2008) 622-629.	101.325	293	1.80327	2.00958	11.4409	1.91638	6.27295
636	training set	1-octyl-3-methylimidazolium tetrafluoroborate	K. R. Harris, M. Kanakubo and L. A. Woolf, J. Chem. Eng. Data, 2006, 51, 1161-1167.	75600	348.15	1.80346	1.78327	-1.11924	1.91606	6.24365
637	training set	1-octyl-3-methylimidazolium hexafluorophosphate	K. R. Harris, M. Kanakubo and L. A. Woolf, J. Chem. Eng. Data, 2006, 51, 1161-1167.	101.325	343.15	1.80414	1.98331	9.93122	2.04909	13.5772
638	training	1-octyl-3-methylimidazolium hexafluorophosphate	Harris, K. R.; Kanakubo, M.; Woolf, L. A.; Temperature and Pressure Dependence of the Viscosity of the Ionic Liquids 1-octyl-3-methylimidazolium Hexafluorophosphate and 1-octyl-3-methylimidazolium tetrafluoroborate; J. Chem. Eng. Data, 51 1161-1167.	101.325	343.15	1.80414	1.98331	9.93125	2.04909	13.5772
639	test set	1-hexyl-3-methylimidazolium hexafluorophosphate	K. R. Harris, M. Kanakubo, L. A. Bis(trifluoromethylsulfonyl)imide. Woolf, J. Chem. Eng. Data, 2007, 52, 1080-1085.	40700	348.15	1.80414	1.9532	8.26211	1.94099	7.58555
640	training set	1-butyl-3-methylimidazolium bis(trifluoromethylsulfonyl)imide	K. R. Harris, M. Kanakubo, L. A. Bis(trifluoromethylsulfonyl)imide. Woolf, J. Chem. Eng. Data, 2007, 52, 1080-1085.	100	293.15	1.80482	2.00702	11.2034	1.91433	6.06773
641	training set	1-butyl-3-methylimidazolium bis(trifluoromethylsulfonyl)imide	K. R. Harris, M. Kanakubo, L. A. Bis(trifluoromethylsulfonyl)imide. Woolf, J. Chem. Eng. Data, 2007, 52, 1080-1085.	100	293.15	1.8055	2.00702	11.1615	1.91433	6.02779
642	training set	1-hexyl pyridinium bis((trifluoromethyl)sulfonyl)amide	J. M. Crosthwaite, M. J. Muldoon, J. N. K. Dixon, J. L. Anderson and J. F. Brennecke, J. Chem. Thermodyn, 2005, 37, 559-568.	101.325	303	1.80618	1.93424	7.09031	1.88044	4.11128
643	training set	1-butyl-3-methylimidazolium octylsulfate	P. Wasserscheid, R. van Hal and A. Bosmann, Green Chem., 2002, 4, 400-404.	101.325	343.1	1.80754	1.26007	-30.288	2.01872	11.6835
644	training set	1-butyl-3-methylimidazolium trifluoromethylsulfonate	K. R. Seddon, A. S. Stark, M.J. Torres, M. Abraham, L. Moens, Eds., ACS Symposium Series 819, American Chemical Society: Washington DC, 2002, 34-49.	101.325	303.15	1.80754	1.75504	-2.90466	1.99285	10.2519
645	training set	1-butyl-3-methylimidazolium bis(trifluoromethylsulfonyl)imide	K. R. Harris, M. Kanakubo, L. A. Bis(trifluoromethylsulfonyl)imide. Woolf, J. Chem. Eng. Data, 2007, 52, 1080-1085.	123600	323.15	1.80821	1.96879	8.88064	1.97618	9.28949
646	training set	1-octyl-3-methylimidazolium tetrafluoroborate	K. R. Harris, M. Kanakubo and L. A. Woolf, J. Chem. Eng. Data, 2006, 51, 1161-1167.	10800	333.15	1.80889	1.79074	-1.00343	1.80914	0.01385
647	test	1-butyl-3-methylimidazolium tetrafluoroborate	O.O. Okoturo, T.J. VanderNoot, Temperature dependence of viscosity for room temperature ionic liquids, Journal of Electroanalytical Chemistry, 568 (2004) 167–181	101.325	308.15	1.81291	1.94737	7.41683	2.00418	10.5505
648	test set	1-butyl-3-methylimidazolium trifluoromethylsulfonate	H. Tokuda, S. Tsuzuki, M. A. B. H. Susan, K. Hayamizu and M. Watanabe, J. Phys. Chem. B, 2006, 110, 19593-19600.	101.325	303.1	1.81558	1.75589	-3.28782	1.99368	9.80949
649	test set	1-hexyl-3-methylimidazolium tetrafluoroborate	Y. A. Sanmamed, D. Gonzalez-Salgado, J. Troncoso, C. A. Cerdeirina and L. Romani, Fluid Phase Equilibria, 2007, 252, 96-102.	101.325	318.15	1.81889	1.90467	4.71607	1.7255	-5.13436
650	training set	1-butyl-3-methylimidazolium hexafluorophosphate	K. R. Harris, L. A. Woolf and M. Kanakubo, J. Chem. Eng. Data, 2005, 50, 1777-1782.	26200	333.15	1.81954	2.02551	11.3201	1.81373	-0.31923
651	training set	1-ethyl-3-methylimidazolium tetrafluoroborate	K. R. Seddon, A. S. Stark, M.J. Torres, M. Abraham, L. Moens, Eds., ACS Symposium Series 819, American Chemical Society: Washington DC, 2002, 34-49.	101.325	293.15	1.82282	2.05464	12.7178	1.83975	0.92902
652	training	1-ethyl-3-methylimidazolium tetrafluoroborate	Kenneth R. Seddon, Annegret Stark, and Maria-Jose Torres, Influence of chloride, water, and organic solvents on the physical properties of ionic liquids, Pure Appl. Chem., 2000 Vol.72 No.12 2275-2287.	101.325	293.15	1.82282	2.05464	12.7177	1.83975	0.92893
653	training set	1-octyl-3-methylimidazolium tetrafluoroborate	Y. A. Sanmamed, D. Gonzalez-Salgado, J. Troncoso, C. A. Cerdeirina and L. Romani, Fluid Phase Equilibria, 2007, 252, 96-102.	101.325	323.15	1.82413	1.91987	5.24853	1.90405	4.38143
654	training set	1-butyl-3-methylimidazolium methylsulfate	A. Ferna´ndez, J. Garcı´a, J. S. Torrecilla,*M. Oliet, F. Rodrı´guez, J. Chem. Eng. Data, 2008, 53, 1518–1522	101.325	323.15	1.82478	1.94221	6.43514	1.62474	-10.9622
655	training	1-butyl-3-methylimidazolium hexafluoroantimony	O.O. Okoturo, T.J. VanderNoot, Temperature dependence of viscosity for room temperature ionic liquids, Journal of Electroanalytical Chemistry, 568 (2004) 167–181	101.325	313.15	1.82607	2.13271	16.7922	1.61451	-11.5858
656	test	1-ethyl-3-methylimidazolium tetrafluoroborate	Hiroyuki Ohno , Masahiro Yoshizawa, Ion conductive characteristics of ionic liquids prepared by neutralization of alkylimidazoles, Solid State Ionics, 154-155 (2002) 303-309.	101.325	298.15	1.82607	1.96964	7.86207	1.76643	-3.26604
657	test set	1-butyl-3-methyl-imidazolium bis(trifluoromethylsulfonyl)imide	K. R. Harris, M. Kanakubo, L. A. Bis(trifluoromethylsulfonyl)imide. Woolf, J. Chem. Eng. Data, 2007, 52, 1080-1085.	249700	348.15	1.82802	2.02549	10.8025	2.04843	12.0575
658	training set	1-hexyl-3-methylimidazolium tetrafluoroborate	K. R. Seddon, A. S. Stark, M.J. Torres, M. Abraham, L. Moens, Eds., ACS Symposium Series 819, American Chemical Society: Washington DC, 2002, 34-49.	101.325	323.15	1.83187	1.81967	-0.66598	1.621	-11.5111
659	training set	1-hexyl-3-methylimidazolium bis(trifluoromethylsulfonyl)imide	J. M. Crosthwaite, M. J. Muldoon, J. N. K. Dixon, J. L. Anderson and J. F. Brennecke, J. Chem. Thermodyn, 2005, 37, 559-568.	101.325	298	1.83251	2.05187	11.9706	2.02215	10.3484
660	training	1-hexyl-3-methylimidazolium bis(trifluoromethylsulfonyl)imide	Kandil, M. E.; Marsh, K. N.; Goodwin, A. R. H.; Measurement of the Viscosity, Density, and Electrical Conductivity of 1-hexyl-3-methylimidazolium Bis(trifluorosulfonyl)imide at Temperatures between (288 and 433) K and Pressures below 50 Mpa; J. Chem. Eng. Data, 52 2382-2387.	101.325	298.15	1.83251	2.04932	11.8315	2.01971	10.2157
661	test set	1-hexyl-3-methylimidazolium bis(trifluoromethylsulfonyl)imide	A. Muhammad, M. I. Abdul Mutalib, C. D. Wilfred, T. Murugesan and A. Shafeeq, J. Chem. Thermodyn., 2008, 40, 1433–1438.	101.325	298.2	1.83251	2.04847	11.785	2.0189	10.1711
662	training set	1-ethyl-3-methylimidazolium n-butylsulfate	A. J. L. Costa, J. M. S. S. Esperança, I. M. Marrucho and L. s. P. N. Rebelo, J. Chem. Eng. Data, 2011, 56, 3433-3441.	101.325	318.15	1.83315	1.77469	-3.18893	1.64461	-10.285
663	training set	1-butyl-3-methylimidazolium bis((trifluoromethyl)sulfonyl)amide	K. R. Harris, M. Kanakubo, L. A. Bis(trifluoromethylsulfonyl)imide. Woolf, J. Chem. Eng. Data, 2007, 52, 1080-1085.	24300	298.15	1.83315	2.01446	9.89088	1.91084	4.23832
664	training set	1-butyl-3-methylimidazolium tetrafluoroborate	K. R. Harris, M. Kanakubo and L. A. Woolf, J. Chem. Eng. Data, 2007, 52, 2425-2430.	75560	323.15	1.83315	1.98063	8.04496	1.99996	9.09966
665	training set	1-hexyl-3-methylimidazolium tetrafluoroborate	E. Rilo, J. Vila, J. Pico, S. Garcia-Garabal, L. Segade, L. M. Varela and O. Cabeza, J. Chem. Eng. Data, 55, 639-644.	101.325	318.15	1.83544	1.90467	3.77185	1.7255	-5.98976
666	training	1-butyl-3-methylimidazolium hexafluorophosphate	Pereiro, A. B.; Legido, J. L.; Rodriguez, A.; Physical properties of ionic liquids based on 1-alkyl-3-methylimidazolium cation and hexafluorophosphate as anion and temperature dependence; J. Chem. Thermodyn. 39 1168-1175.	101.325	323.15	1.83753	2.09582	14.0565	1.88711	2.69856
667	training set	1-butyl-3-methylimidazolium nitrate	K. R. Seddon, A. S. Stark, M.J. Torres, M. Abraham, L. Moens, Eds., ACS Symposium Series 819, American Chemical Society: Washington DC, 2002, 34-49.	101.325	333.15	1.83759	2.02781	10.3516	1.72975	-5.86851
668	training set	1-hexyl-3-methylimidazolium tetrafluoroborate	A. Muhammad, M. I. Abdul Mutalib, C. D. Wilfred, T. Murugesan and A. Shafeeq, J. Chem. Thermodyn., 2008, 40, 1433–1438.	101.325	308.2	1.83885	2.07382	12.7781	1.96452	6.83409
669	training	1-butyl-3-methylimidazolium bis(trifluoromethylsulfonyl)imide	Andrew P. Abbott and Katy J. McKenzie, Application of ionic liquids to the electrodeposition of metals, Phys. Chem. Chem. Phys., 8 (2006), 4265-4279.	101.325	298	1.83885	1.92458	4.66197	1.8582	1.05229
670	training	1-butyl-3-methylimidazolium bis(trifluoromethylsulfonyl)imide	O.O. Okoturo, T.J. VanderNoot, Temperature dependence of viscosity for room temperature ionic liquids, Journal of Electroanalytical Chemistry, 568 (2004) 167–181	101.325	288.15	1.83885	2.09203	13.7682	2.00139	8.83916
671	training set	1-hexyl-3-methylimidazolium bis(trifluoromethylsulfonyl)imide	H. Tokuda, S. Tsuzuki, M. A. B. H. Susan, K. Hayamizu and M. Watanabe, J. Phys. Chem. B, 2006, 110, 19593-19600.	101.325	298.1	1.84323	2.05017	11.2271	2.02053	9.61877
672	training set	1-octyl-3-methylimidazolium iodide	M. H. Ghatee, M. Zare, F. Moosavi and A. R. Zolghadr, J. Chem. Eng. Data, 2010, 55, 3084-3088.	101.325	353.15	1.84354	1.81331	-1.63961	1.90089	3.11064
673	training set	1-butyl-3-methylimidazolium trifluoroacetate	J. M. Crosthwaite, M. J. Muldoon, J. N. K. Dixon, J. L. Anderson and J. F. Brennecke, J. Chem. Thermodyn, 2005, 37, 559-568.	101.325	298	1.8451	1.96396	6.44188	2.00106	8.45267
674	training set	1-ethyl-3-methylpyridinium ethylsulfate	J. M. Crosthwaite, M. J. Muldoon, J. N. K. Dixon, J. L. Anderson and J. F. Brennecke, J. Chem. Thermodyn, 2005, 37, 559-568.	101.325	313	1.8451	1.96143	6.30454	1.83549	-0.52075
675	test	1-hexyl-3-methylimidazolium bis(trifluoromethylsulfonyl)imide	Jason A. Widegren and Joseph W. Magee, Density, Viscosity, Speed of Sound, and Electrolytic Conductivity for the Ionic Liquid 1-hexyl-3-methylimidazolium Bis(trifluoromethylsulfonyl)imide and Its Mixtures with Water, J. Chem. Eng. Data, 52 (2007) 2331-2338.	101.325	298.15	1.84566	2.04932	11.0349	2.01971	9.43058
676	training set	1-butylpyridinium tetrafluoroborate	B. Mokhtarani, A. Sharifi, H. R. Mortaheb, M. Mirzaei, M. Mafi and F. Sadeghian, J. Chem. Thermodyn, 2009, 41, 323-329.	101.325	313.15	1.84689	1.87982	1.78278	1.86078	0.75193
677	training	1-hexyl-3-methylimidazolium bis(trifluoromethylsulfonyl)imide	Jason A. Widegren and Joseph W. Magee, Density, Viscosity, Speed of Sound, and Electrolytic Conductivity for the Ionic Liquid 1-hexyl-3-methylimidazolium Bis(trifluoromethylsulfonyl)imide and Its Mixtures with Water, J. Chem. Eng. Data, 52 (2007) 2331-2338.	101.325	298.15	1.84689	2.04932	10.9605	2.01971	9.35726
678	training set	1-hexyl-3-methylimidazolium iodide	M. H. Ghatee, M. Zare, F. Moosavi and A. R. Zolghadr, J. Chem. Eng. Data, 2010, 55, 3084-3088.	101.325	348.15	1.84751	1.79811	-2.6737	1.81392	-1.81838
679	training set	1-octyl-3-methylimidazolium bis(trifluoromethylsulfonyl)imide	H. Tokuda, K. Hayamizu, K. Ishii, M. A. B. H. Susan and M. Watanabe, J. Phys. Chem. B, 2005, 109, 6103-6110.	101.325	303.15	1.85224	2.06452	11.4608	1.99873	7.90886
680	training set	1-octyl-3-methylimidazolium bis(trifluoromethylsulfonyl)imide	H. Tokuda, S. Tsuzuki, M. A. B. H. Susan, K. Hayamizu and M. Watanabe, J. Phys. Chem. B, 2006, 110, 19593-19600.	101.325	303.1	1.8537	2.06537	11.4189	2.00043	7.91558
681	training set	1-ethyl-3-methylimidazolium trifluoromethylsulfonate	K. R. Seddon, A. S. Stark, M.J. Torres, M. Abraham, L. Moens, Eds., ACS Symposium Series 819, American Chemical Society: Washington DC, 2002, 34-49.	101.325	283.15	1.85854	1.94731	4.77606	2.07056	11.4081
682	test set	1-ethyl-3-methyl imidazolium hydrogen sulfate	A. J. L. Costa, J. M. S. S. Esperança, I. M. Marrucho and L. s. P. N. Rebelo, J. Chem. Eng. Data, 2011, 56, 3433-3441.	101.325	363.15	1.85974	1.98529	6.75111	1.97336	6.10957
683	training set	1-butyl-3-methylimidazolium tetrafluoroborate	K. R. Harris, M. Kanakubo and L. A. Woolf, J. Chem. Eng. Data, 2007, 52, 2425-2430.	225500	348.15	1.86094	2.1284	14.3721	2.07188	11.335
684	test set	1,3-dimethylimidazolium methylsulfate	A. B. Pereiro, F. Santamarta, E. Tojo, A. Rodrı´guez, J. Tojo, J. Chem. Eng. Data, 2006, 51, 952-954	101.325	298.15	1.86279	2.21561	18.9405	2.07508	11.3961
685	training set	1-butyl-3-methylimidazolium hexafluorophosphate	K. R. Harris, L. A. Woolf and M. Kanakubo, J. Chem. Eng. Data, 2005, 50, 1777-1782.	100	323.15	1.86688	2.09581	12.2628	1.88711	1.08367
686	training set	1-butyl-3-methylimidazolium hexafluorophosphate	K. R. Harris, L. A. Woolf and M. Kanakubo, J. Chem. Eng. Data, 2005, 50, 1777-1782.	75600	343.15	1.86747	2.04422	9.46478	2.05972	10.2948
687	training set	1-hexyl-3-methylimidazolium hexafluorophosphate	D.Tomida, A.Kumagai, S. Kenmochi, K. Qiao, C. Yokoyama, J. Chem. Eng. Data, 2007, 52, 577-579.	100	333.15	1.86806	2.05311	9.90589	2.07398	11.0229
688	training	1-(2-methoxyethyl)-3-methylimidazolium trifluoromethanesulfonate	Zhang, S., Ionic liquids : physicochemical properties. Elsevier: Amsterdam ; London, 2009.	101.325	293.15	1.86923	1.80745	-3.30515	1.9158	2.4915
689	training	1-(2-methoxyethyl)-3-methylimidazolium trifluoromethanesulfonate	Pierre Bonhote,Ana-Paula Dias, Nicholas Papageorgiou, Kuppuswamy Kalyanasundaram, and Michael Gra1tzel,Hydrophobic, Highly Conductive Ambient-Temperature Molten Salts, Inorg. Chem. 35 (1996) 1168-1178.	101.325	293.15	1.86923	1.80745	-3.30515	1.9158	2.4915
690	training	1-butyl-3-methylimidazolium trifluoromethanesulfonate	O.O. Okoturo, T.J. VanderNoot, Temperature dependence of viscosity for room temperature ionic liquids, Journal of Electroanalytical Chemistry, 568 (2004) 167–181	101.325	298.15	1.86923	1.84004	-1.56185	2.07826	11.1826
691	training set	1-butyl-3-methylimidazolium hexafluorophosphate	K. R. Harris, L. A. Woolf and M. Kanakubo, J. Chem. Eng. Data, 2005, 50, 1777-1782.	100	323.15	1.86982	2.09581	12.0863	1.88711	0.92473
692	training set	1-butyl-3-methyl imidazolium octylsulfate	J. Jacquemin, P. Husson, V. Majer, A. A. H. Padua and M. F. C. Gomes, Green Chem., 2008, 10, 944-950.	101.325	342.07	1.8704	1.27758	-31.6947	2.03724	8.92
693	training	1-butyl-3-methylimidazolium tetrafluoroborate	Zhou, Q.; Wang, L.-S.; Densities and Viscosities of 1-butyl-3-methylimidazolium tetrafluoroborate + H2O Binary Mixtures from (303.15 to 353.15) K; J. Chem. Eng. Data, 51 905-908.	101.325	303.15	1.87046	2.03237	8.65624	2.08128	11.2711
694	training set	1-hexyl-3-methylimidazolium hexafluorophosphate	K. R. Harris, M. Kanakubo, L. A. Bis(trifluoromethylsulfonyl)imide. Woolf, J. Chem. Eng. Data, 2007, 52, 1080-1085.	100	333.15	1.87157	2.05311	9.69977	2.07398	10.8147
695	test set	1-hexyl-3-methylimidazolium hexafluorophosphate	K. R. Harris, M. Kanakubo, L. A. Bis(trifluoromethylsulfonyl)imide. Woolf, J. Chem. Eng. Data, 2007, 52, 1080-1085.	100	333.15	1.87157	2.05311	9.69977	2.07398	10.8147
696	training set	1-ethyl-3-methylimidazolium n-octylsulfate	B. Hasse, J. Lehmann, D. Assenbaum, P. Wasserscheid, A. Leipertz and A. P. Fröba, J. Chem. Eng. Data ,2009, 54, 2576-2583.	101.325	338.15	1.87216	1.19649	-36.0904	1.98996	6.29199
697	test set	1-octyl-3-methylimidazolium tetrafluoroborate	K. R. Harris, M. Kanakubo and L. A. Woolf, J. Chem. Eng. Data, 2006, 51, 1161-1167.	25700	333.15	1.87274	1.84766	-1.33937	1.84628	-1.41302
698	training set	1-octyl-3-methylimidazolium tetrafluoroborate	B. Mokhtarani, M. M. Mojtahedi, H. R. Mortaheb, M. Mafi, F. Yazdani and F. Sadeghian, J. Chem. Eng. Data, 2008, 53, 677-682.	101.325	328.15	1.87384	1.83487	-2.07968	1.84103	-1.7512
699	training set	1-butyl-3-methylimidazolium hexafluorophosphate	K. R. Harris, L. A. Woolf and M. Kanakubo, J. Chem. Eng. Data, 2005, 50, 1777-1782.	1300	323.15	1.87448	2.1004	12.0522	1.88849	0.74744
700	training set	1-butyl-3-methylimidazolium hexafluorophosphate	K. R. Harris, L. A. Woolf and M. Kanakubo, J. Chem. Eng. Data, 2005, 50, 1777-1782.	100	323.15	1.87448	2.09581	11.8077	1.88711	0.67383
701	training set	1-butyl-1-methyl pyrrolidinium bis(trifluoromethylsulfonyl)imide	H. Tokuda, S. Tsuzuki, M. A. B. H. Susan, K. Hayamizu and M. Watanabe, J. Phys. Chem. B, 2006, 110, 19593-19600.	101.325	298.1	1.87448	1.90065	1.39621	1.85214	-1.19163
702	training	1-butyl-3-methylimidazolium tetrafluoroborate	Sergei Arzhantsev, Hui Jin, Gary A. Baker, and Mark Maroncelli, Measurements of the Complete Solvation Response in Ionic Liquids, J. Phys. Chem. B, 111 ( 200) 4978-4989.	101.325	298.15	1.87506	2.11737	12.9229	2.13045	13.6205
703	training set	1-hexyl-3-methylimidazolium hexafluorophosphate	K. R. Harris, M. Kanakubo, L. A. Bis(trifluoromethylsulfonyl)imide. Woolf, J. Chem. Eng. Data, 2007, 52, 1080-1085.	100	333.15	1.87622	2.05311	9.42789	2.07398	10.5401
704	training set	Triethylheptylammonium bis(trifluoromethylsulfonyl)imide	J. Sun, M. Forsyth and D. R. MacFarlane, J. Phys. Chem. B, 1998, 102, 8858-8864.	101.325	298.1	1.87795	2.06274	9.83976	2.04576	8.93562
705	training set	1-butylpyridinium bis(trifluoromethylsulfonyl)imide	H. Tokuda, S. Tsuzuki, M. A. B. H. Susan, K. Hayamizu and M. Watanabe, J. Phys. Chem. B, 2006, 110, 19593-19600.	101.325	293.1	1.87852	2.02532	7.81454	1.92118	2.27112
706	training	1-ethyl-3-methylimidazolium bis(trifluoromethylsulfonyl)imide	Andreas P. Froba, Heiko Kremer, and Alfred Leipertz, Density, Refractive Index, Interfacial Tension, and Viscosity of Ionic Liquids [EMIM][EtSO4], [EMIM][NTf2], [EMIM][N(CN)2], and [OMA][NTf2] in Dependence on Temperature at Atmospheric Pressure, J. Phys. Chem. B, 112 (2008) 12420-12430.	101.325	278.15	1.8791	2.11429	12.5165	2.06381	9.82988
707	training set	1-decyl-3-methylimidazolium bis(trifluoromethylsulfonyl)imide	A. Ahosseini and A. M. Scurto, Int. J. Thermophys, 2008, 29, 1222-1243.	68870	323.15	1.88081	2.07889	10.5314	1.88838	0.4027
708	test set	Trimethyl(butyl)ammonium bis(trifluoromethylsulfonyl)imide	H. Tokuda, S. Tsuzuki, M. A. B. H. Susan, K. Hayamizu and M. Watanabe, J. Phys. Chem. B, 2006, 110, 19593-19600.	101.325	303.1	1.88423	1.80008	-4.46624	1.78936	-5.03477
709	training set	1-ethyl-3-methylimidazolium ethylsulfate	E. Go´mez, B. Gonza´lez, N. Calvar, E. Tojo, A. Domı´nguez, J. Chem. Eng. Data, 2006, 51, 2096-2102	101.325	303.15	1.88463	2.14512	13.822	1.99996	6.11939
710	training set	1-butyl-3-methylimidazolium trifluoroacetate	H. Tokuda, K. Hayamizu, K. Ishii, Md. A. B. H. Susan, M. Watanabe, J. Phys. Chem. B, 2004, 108, 16593-16600.	101.325	298.1	1.88593	1.96226	4.04729	1.99987	6.0416
711	training set	1-butyl-3-methylimidazolium hexafluorophosphate	K. R. Harris, L. A. Woolf and M. Kanakubo, J. Chem. Eng. Data, 2005, 50, 1777-1782.	3100	323.15	1.88593	2.10727	11.7365	1.89116	0.27706
712	training set	1-butyl-1-methyl pyrrolidinium bis(trifluoromethylsulfonyl)imide	A. B. Pereiro, H. I. M. Veiga, J. M. S. S. Esperanca and A. Rodriguez, J. Chem. Thermodyn., 2009, 41, 1419–1423.	101.325	298.15	1.88604	1.8998	0.72966	1.8516	-1.82588
713	training set	1-methyl-3-methyl imidazolium bis(trifluoromethylsulfonyl)imide	H. Tokuda, K. Hayamizu, K. Ishii, M. A. B. H. Susan and M. Watanabe, J. Phys. Chem. B, 2005, 109, 6103-6110.	101.325	283.15	1.88683	2.02543	7.34564	1.90574	1.00204
714	test set	1-butyl-3-methylimidazolium methylsulfate	A. B.Pereiro, P. Verdía, E. Tojo, A. Rodríguez, J. Chem. Eng. Data, 2007, 52, (2), 377-380.	101.325	318.15	1.88694	2.02721	7.43357	1.7073	-9.52042
715	training	1-butyl-3-methylimidazolium tetrafluoroborate	Izabela Stepniak, Ewa Andrzejewska, Highly conductive ionic liquid based ternary polymer electrolytes obtained by in situ photopolymerisation, Electrochimica Acta, 54 (2009) 5660-5665.	101.325	298.15	1.88705	2.11737	12.2052	2.13045	12.8984
716	training set	1-butyl-3-methylimidazolium iodide	M. H. Ghatee, M. Zare, F. Moosavi and A. R. Zolghadr, J. Chem. Eng. Data, 2010, 55, 3084-3088.	101.325	333.15	1.89037	1.92582	1.87514	1.72255	-8.87745
717	training set	1-octyl-3-methylimidazolium tetrafluoroborate	K. R. Harris, M. Kanakubo and L. A. Woolf, J. Chem. Eng. Data, 2006, 51, 1161-1167.	100500	348.15	1.89042	1.87839	-0.63621	1.96865	4.13831
718	test set	1,3-dimethylimidazolium methylsulfate	E. Gomez, B. Gonzalez, N. Calvar and A. Dominguez, J. Chem. Thermodyn, 2008, 40, 1208-1216.	101.325	298.15	1.89042	2.21561	17.202	2.07508	9.76798
719	training	1-ethyl-3-methylimidazolium ethylsulfate	Andreas P. Froba, Heiko Kremer, and Alfred Leipertz, Density, Refractive Index, Interfacial Tension, and Viscosity of Ionic Liquids [EMIM][EtSO4], [EMIM][NTf2], [EMIM][N(CN)2], and [OMA][NTf2] in Dependence on Temperature at Atmospheric Pressure, J. Phys. Chem. B, 112 (2008) 12420-12430.	101.325	303.15	1.89098	2.17604	15.0746	2.08205	10.1042
720	training set	N-butyl-3-methylpyridinium tetrafluoroborate	J. M. Crosthwaite, M. J. Muldoon, J. N. K. Dixon, J. L. Anderson and J. F. Brennecke, J. Chem. Thermodyn, 2005, 37, 559-568.	101.325	313.15	1.89209	1.83229	-3.16052	1.89934	0.38295
721	training	1-butyl-3-methylimidazolium tetrafluoroborate	O.O. Okoturo, T.J. VanderNoot, Temperature dependence of viscosity for room temperature ionic liquids, Journal of Electroanalytical Chemistry, 568 (2004) 167–181	101.325	303.15	1.89209	2.03237	7.41398	2.08128	9.9989
722	test	1-butyl-3-methylimidazolium hexafluoroantimony	O.O. Okoturo, T.J. VanderNoot, Temperature dependence of viscosity for room temperature ionic liquids, Journal of Electroanalytical Chemistry, 568 (2004) 167–181	101.325	308.15	1.89209	2.21771	17.2094	1.71877	-9.16023
723	training set	1-butyl-3-methylimidazolium hexafluorophosphate	K. R. Harris, L. A. Woolf and M. Kanakubo, J. Chem. Eng. Data, 2005, 50, 1777-1782.	5600	323.15	1.89321	2.11682	11.8113	1.89604	0.1496
724	training set	1-butyl-3-methylimidazolium hexafluorophosphate	W. Fan, Q. Zhou, J. Sun and S. J. Zhang, J. Chem. Eng. Data, 2009, 54, 2307-2311.	101.325	323.15	1.89639	2.09582	10.5161	1.88711	-0.48924
725	training set	1-ethyl-3-methylimidazolium methylsulfate	A. J. L. Costa, J. M. S. S. Esperança, I. M. Marrucho and L. s. P. N. Rebelo, J. Chem. Eng. Data, 2011, 56, 3433-3441.	101.325	298.15	1.89653	2.21948	17.0282	2.07433	9.37517
726	training set	1-butyl-3-methylimidazolium bis((trifluoromethyl)sulfonyl)amide	K. R. Harris, M. Kanakubo, L. A. Bis(trifluoromethylsulfonyl)imide. Woolf, J. Chem. Eng. Data, 2007, 52, 1080-1085.	274500	348.15	1.89763	2.12023	11.7303	2.10833	11.1031
727	training set	1-hexyl-3-methylimidazolium hexafluorophosphate	D.Tomida, A.Kumagai, S. Kenmochi, K. Qiao, C. Yokoyama, J. Chem. Eng. Data, 2007, 52, 577-579.	5000	333.15	1.89982	2.07183	9.05381	2.07753	9.35408
728	training set	1-butyl-3-methyl pyridinium bis((trifluoromethyl)sulfonyl)amide	J. M. Crosthwaite, M. J. Muldoon, J. N. K. Dixon, J. L. Anderson and J. F. Brennecke, J. Chem. Thermodyn, 2005, 37, 559-568.	101.325	293	1.90309	1.97949	4.01461	1.91271	0.50525
729	training	1-butyl-3-methylimidazolium hexafluorophosphate	O.O. Okoturo, T.J. VanderNoot, Temperature dependence of viscosity for room temperature ionic liquids, Journal of Electroanalytical Chemistry, 568 (2004) 167–181	101.325	323.15	1.90309	2.09582	10.1271	1.88711	-0.83957
730	test set	1-hexyl pyridinium bis((trifluoromethyl)sulfonyl)amide	J. M. Crosthwaite, M. J. Muldoon, J. N. K. Dixon, J. L. Anderson and J. F. Brennecke, J. Chem. Thermodyn, 2005, 37, 559-568.	101.325	298	1.90309	2.01924	6.10343	1.95827	2.89952
731	training	1-hexyl-3-methylimidazolium bis(trifluoromethylsulfonyl)imide	Glen McHale, Chris Hardacre, Rile Ge, Nicola Doy, Ray W. K.Allen, Jordan M. MacInnes, Mark R.Bown, and MichaelI. Newton, Density-Viscosity Product of Small-Volume Ionic Liquid Samples Using Quartz Crystal Impedance Analysis, Anal. Chem., 80 (2008) 5806-5811.	101.325	298.15	1.90363	2.04932	7.65322	2.01971	6.09779
732	training set	1-hexyl-3-methylimidazolium hexafluorophosphate	K. R. Seddon, A. S. Stark, M.J. Torres, M. Abraham, L. Moens, Eds., ACS Symposium Series 819, American Chemical Society: Washington DC, 2002, 34-49.	101.325	333.15	1.90472	2.05311	7.79081	2.07398	8.88613
733	training	1-butyl-3-methylimidazolium hexafluorophosphate	Ramesh L. Gardas, Joao A.P. Coutinho, A group contribution method for viscosity estimation of ionic liquids, Fluid Phase Equilibria, 266 (2008) 195-201.	101.325	323.15	1.90526	2.09582	10.0019	1.88711	-0.95231
734	test set	1-dodecyl-3-methyl imidazolium hexafluorophosphate	K. R. Seddon, A. S. Stark, M.J. Torres, M. Abraham, L. Moens, Eds., ACS Symposium Series 819, American Chemical Society: Washington DC, 2002, 34-49.	101.325	353.15	1.90526	2.00152	5.05238	1.99132	4.51712
735	training	1-hexyl-3-methylimidazolium bis(trifluoromethylsulfonyl)imide	Kenneth N. Marsh, Joan F. Brennecke, Robert D. Chirico，Michael Frenkel, Andreas Heintz, Joseph W. Magee, Cor J. Peters, Luis Paulo N. Rebelo, and Kenneth R. Seddon，Thermodynamic and thermophysical properties of the reference ionic liquid: 1-hexyl-3-methylimidazolium bis[(trifluoromethyl)sulfonyl]amide (including mixtures),Pure Appl. Chem., 2009 Vol.81 No.5 781-790.	101.325	293.15	1.90687	2.13432	11.9278	2.09192	9.70428
736	training set	1-octyl-3-methylimidazolium hexafluorophosphate	K. R. Harris, M. Kanakubo and L. A. Woolf, J. Chem. Eng. Data, 2006, 51, 1161-1167.	101.325	343.15	1.90849	1.98331	3.92054	2.04909	7.36717
737	training set	1-butyl-3-methylimidazolium bis(trifluoromethylsulfonyl)imide	K. R. Harris, M. Kanakubo, L. A. Bis(trifluoromethylsulfonyl)imide. Woolf, J. Chem. Eng. Data, 2007, 52, 1080-1085.	100	288.15	1.91169	2.09202	9.43305	2.00139	4.69206
738	test set	1-butyl-3-methylimidazolium bis((trifluoromethyl)sulfonyl)amide	K. R. Harris, M. Kanakubo, L. A. Bis(trifluoromethylsulfonyl)imide. Woolf, J. Chem. Eng. Data, 2007, 52, 1080-1085.	100	288.15	1.91169	2.09202	9.43305	2.00139	4.69206
739	training set	1-hexyl-3-methylimidazolium tetrafluoroborate	Y. A. Sanmamed, D. Gonzalez-Salgado, J. Troncoso, C. A. Cerdeirina and L. Romani, Fluid Phase Equilibria, 2007, 252, 96-102.	101.325	313.15	1.91222	1.98967	4.05027	1.84596	-3.46506
740	test set	1-octyl-3-methylimidazolium tetrafluoroborate	Y. A. Sanmamed, D. Gonzalez-Salgado, J. Troncoso, C. A. Cerdeirina and L. Romani, Fluid Phase Equilibria, 2007, 252, 96-102.	101.325	318.15	1.91275	2.00487	4.81611	2.00142	4.6359
741	training set	1-butyl-3-methylimidazolium hexafluorophosphate	K. R. Harris, L. A. Woolf and M. Kanakubo, J. Chem. Eng. Data, 2005, 50, 1777-1782.	10700	323.15	1.91751	2.1363	11.4103	1.91026	-0.37807
742	training set	1-butyl-3-methylimidazolium nitrate	B. Mokhtarani, A. Sharifi, H. R. Mortaheb, M. Mirzaei, M. Mafi and F. Sadeghian, J. Chem. Thermodyn, 2009, 41, 1432-1438.	101.325	313.15	1.91803	2.24051	16.8133	1.78636	-6.86473
743	training	1-ethyl-3-methylimidazolium ethylsulfate	Ergun Altin, Johannes Gradl, Wolfgang Peukert, First Studies on the Rheological Behavior of Suspensions in Ionic Liquids, Chem. Eng. Technol., 29 (2006) No.11 1347-1354.	101.325	298.15	1.91803	2.26104	17.8833	2.11463	10.2498
744	training	1-butyl-3-methylimidazolium tetrafluoroborate	Jacqueline A. Whitehead, Geoffrey A. Lawrance, Adam McCluskey, Analysis of Gold in Solutions Containing Ionic Liquids by inductively coupled plasma atomic emission spectrometry, Aust. J. Chem., 57 (2004) 151-155.	101.325	298.15	1.91908	2.11737	10.3329	2.13045	11.0144
745	training set	1-butyl-3-methylimidazolium tetrafluoroborate	K. R. Harris, M. Kanakubo and L. A. Woolf, J. Chem. Eng. Data, 2007, 52, 2425-2430.	100566	323.15	1.92065	2.07615	8.09617	2.13212	11.0104
746	training set	1-butyl-3-methylimidazolium bis(trifluoromethylsulfonyl)imide	K. R. Harris, M. Kanakubo, L. A. Bis(trifluoromethylsulfonyl)imide. Woolf, J. Chem. Eng. Data, 2007, 52, 1080-1085.	152800	323.15	1.92221	2.08033	8.22619	2.02621	5.41039
747	training set	1-hexyl-3-methylimidazolium hexafluorophosphate	D.Tomida, A.Kumagai, S. Kenmochi, K. Qiao, C. Yokoyama, J. Chem. Eng. Data, 2007, 52, 577-579.	10000	333.15	1.92324	2.09093	8.71893	2.08378	8.34731
748	training set	1-hexyl-3-methylimidazolium iodide	M. H. Ghatee, M. Zare, F. Moosavi and A. R. Zolghadr, J. Chem. Eng. Data, 2010, 55, 3084-3088.	101.325	343.15	1.92387	1.88311	-2.11849	1.90748	-0.85215
749	training	1-butyl-3-methylimidazolium bis(trifluoromethylsulfonyl)imide	O.O. Okoturo, T.J. VanderNoot, Temperature dependence of viscosity for room temperature ionic liquids, Journal of Electroanalytical Chemistry, 568 (2004) 167–181	101.325	283.15	1.92428	2.17703	13.1346	2.13508	10.955
750	training set	1-butyl-3-methylimidazolium trifluoromethane sulfonate	H. Tokuda, S. Tsuzuki, M. A. B. H. Susan, K. Hayamizu and M. Watanabe, J. Phys. Chem. B, 2006, 110, 19593-19600.	101.325	298.1	1.92634	1.84089	-4.43603	2.07913	7.93175
751	training set	1-butyl-3-methylimidazolium tetrafluoroborate	K. R. Harris, M. Kanakubo and L. A. Woolf, J. Chem. Eng. Data, 2007, 52, 2425-2430.	100	303.15	1.92737	2.03237	5.44779	2.08128	7.98559
752	training set	1-butyl-3-methylimidazolium tetrafluoroborate	K. R. Harris, M. Kanakubo and L. A. Woolf, J. Chem. Eng. Data, 2007, 52, 2425-2430.	100	303.15	1.92737	2.03237	5.44779	2.08128	7.98559
753	training set	1-butyl-3-methylimidazolium tetrafluoroborate	K. R. Harris, M. Kanakubo and L. A. Woolf, J. Chem. Eng. Data, 2007, 52, 2425-2430.	250400	348.15	1.92737	2.22351	15.3652	2.13681	10.8668
754	training set	1-butyl-3-methylimidazolium methylsulfate	E. Gómez, B. González, N. Calvar, E. Tojo and Á. Domínguez, J. Chem. Eng. Data, 2006, 51, 2096-2102.	101.325	313.15	1.92788	2.11221	9.56113	1.80652	-6.29475
755	training set	1-butyl-3-methylimidazolium methylsulfate	E. Gómez, B. González, N. Calvar, E. Tojo and Á. Domínguez, J. Chem. Eng. Data, 2006, 51, 2096-2102.	101.325	313.15	1.9284	2.11221	9.53158	1.80652	-6.32002
756	training set	1-ethyl-3-methylimidazolium n-butylsulfate	A. J. L. Costa, J. M. S. S. Esperança, I. M. Marrucho and L. s. P. N. Rebelo, J. Chem. Eng. Data, 2011, 56, 3433-3441.	101.325	313.15	1.9284	1.85969	-3.56295	1.72034	-10.7895
757	training set	1-octyl-3-methylimidazolium iodide	M. H. Ghatee, M. Zare, F. Moosavi and A. R. Zolghadr, J. Chem. Eng. Data, 2010, 55, 3084-3088.	101.325	348.15	1.92865	1.89831	-1.57296	1.97808	2.56317
758	training set	1-butyl-3-methylimidazolium nitrate	K. R. Seddon, A. S. Stark, M.J. Torres, M. Abraham, L. Moens, Eds., ACS Symposium Series 819, American Chemical Society: Washington DC, 2002, 34-49.	101.325	313.15	1.92942	2.24051	16.1237	1.78636	-7.41454
759	training set	1-ethyl-3-methyl imidazolium hydrogen sulfate	A. J. L. Costa, J. M. S. S. Esperança, I. M. Marrucho and L. s. P. N. Rebelo, J. Chem. Eng. Data, 2011, 56, 3433-3441.	101.325	358.15	1.93044	2.07029	7.24462	2.0115	4.19917
760	training set	1-butyl-3-methylimidazolium hexafluorophosphate	K. R. Harris, L. A. Woolf and M. Kanakubo, J. Chem. Eng. Data, 2005, 50, 1777-1782.	51100	333.15	1.93247	2.12063	9.73687	2.00091	3.54167
761	training set	1-decyl-3-methylimidazolium bis(trifluoromethylsulfonyl)amide	A. Ahosseini and A. M. Scurto, Int. J. Thermophys, 2008, 29, 1222-1243.	83290	323.15	1.93399	2.13397	10.3403	1.99885	3.35382
762	training	1-butyl-3-methylimidazolium hexafluorophosphate	Pereiro, A. B.; Legido, J. L.; Rodriguez, A.; Physical properties of ionic liquids based on 1-alkyl-3-methylimidazolium cation and hexafluorophosphate as anion and temperature dependence; J. Chem. Thermodyn. 39 1168-1175.	101.325	318.15	1.93399	2.18082	12.7624	2.01699	4.29156
763	training set	1-hexyl-3-methylimidazolium bis(trifluoromethylsulfonyl)imide	J. M. Crosthwaite, M. J. Muldoon, J. N. K. Dixon, J. L. Anderson and J. F. Brennecke, J. Chem. Thermodyn, 2005, 37, 559-568.	101.325	293	1.9345	2.13687	10.4612	2.09391	8.24039
764	training	1-hexyl-3-methylimidazolium bis(trifluoromethylsulfonyl)imide	Kandil, M. E.; Marsh, K. N.; Goodwin, A. R. H.; Measurement of the Viscosity, Density, and Electrical Conductivity of 1-hexyl-3-methylimidazolium Bis(trifluorosulfonyl)imide at Temperatures between (288 and 433) K and Pressures below 50 Mpa; J. Chem. Eng. Data, 52 2382-2387.	101.325	293.15	1.9345	2.13432	10.3295	2.09192	8.13769
765	training set	1-butyl-3-methyl imidazolium bis(pentafluoroethylsulfonyl)imide	H. Tokuda, S. Tsuzuki, M. A. B. H. Susan, K. Hayamizu and M. Watanabe, J. Phys. Chem. B, 2006, 110, 19593-19600.	101.325	303.1	1.93902	1.75284	-9.60178	1.90154	-1.93308
766	training set	1-hexyl-3-methylimidazolium bis(trifluoromethylsulfonyl)imide	H. Tokuda, K. Hayamizu, K. Ishii, M. A. B. H. Susan and M. Watanabe, J. Phys. Chem. B, 2005, 109, 6103-6110.	101.325	293.15	1.94037	2.13432	9.99561	2.09192	7.81046
767	training	1-hexyl-3-methylimidazolium bis(trifluoromethylsulfonyl)imide	Christopher Hardacre, John D. Holbrey, Suhas P. Katdare and Kenneth R. Seddon, Alternating copolymerisation of styrene and carbon monoxide in ionic liquids, Green Chemistry, 4 (2002) 143-146.	101.325	293.15	1.94101	2.13432	9.9591	2.09192	7.77468
768	test set	1-hexyl-3-methylimidazolium hexafluoroborate	D.Tomida, A.Kumagai, S. Kenmochi, K. Qiao, C. Yokoyama, J. Chem. Eng. Data, 2007, 52, 577-579.	15000	333.15	1.9425	2.11003	8.62425	2.0926	7.72732
769	training set	1-octyl-3-methylimidazolium tetrafluoroborate	K. R. Seddon, A. S. Stark, M.J. Torres, M. Abraham, L. Moens, Eds., ACS Symposium Series 819, American Chemical Society: Washington DC, 2002, 34-49.	101.325	323.1	1.94448	1.92072	-1.22192	1.90485	-2.03788
770	training set	1-octyl-3-methylpyridinium bis(trifluoromethylsulfonyl)imide	J. M. Crosthwaite, M. J. Muldoon, J. N. K. Dixon, J. L. Anderson and J. F. Brennecke, J. Chem. Thermodyn, 2005, 37, 559-568.	101.325	303	1.94448	2.04535	5.18759	2.00583	3.1552
771	training	1,2-dimethyl-3-ethylimidazolium bis ((trifluoromethyl)sulfonyl)imide	Bonhote P, Dias A P, Papageorgiou N, et al. Hydrophobic, highly conductive ambient-temperature molten salts. Inorg. Chem. 1996. 35, 1168-1178.	101.325	293.15	1.94448	1.90241	-2.16371	1.86092	-4.29738
772	training set	1-octyl-3-methylimidazolium tetrafluoroborate	K. R. Harris, M. Kanakubo and L. A. Woolf, J. Chem. Eng. Data, 2006, 51, 1161-1167.	100	323.15	1.94792	1.91986	-1.44025	1.90405	-2.25199
773	test set	1-octyl-3-methylimidazolium tetrafluoroborate	K. R. Harris, M. Kanakubo and L. A. Woolf, J. Chem. Eng. Data, 2006, 51, 1161-1167.	100	323.15	1.94792	1.91986	-1.44025	1.90405	-2.25199
774	training set	1-octyl-3-methylimidazolium tetrafluoroborate	K. R. Harris, M. Kanakubo and L. A. Woolf, J. Chem. Eng. Data, 2006, 51, 1161-1167.	100	323.15	1.94841	1.91986	-1.46504	1.90405	-2.27658
775	training set	1-butyl-3-methylimidazolium trifluoroacetate	J. M. Crosthwaite, M. J. Muldoon, J. N. K. Dixon, J. L. Anderson and J. F. Brennecke, J. Chem. Thermodyn, 2005, 37, 559-568.	101.325	293	1.94939	2.04896	5.1077	2.05535	5.43574
776	training	1-butyl-3-ethylimidazolium trifluoroacetate	Pierre Bonhote,Ana-Paula Dias, Nicholas Papageorgiou, Kuppuswamy Kalyanasundaram, and Michael Gra1tzel,Hydrophobic, Highly Conductive Ambient-Temperature Molten Salts, Inorg. Chem. 35 (1996) 1168-1178.	101.325	293.15	1.94939	2.03226	4.25113	2.04953	5.1369
777	training set	1-octyl-3-methylimidazolium tetrafluoroborate	K. R. Harris, M. Kanakubo and L. A. Woolf, J. Chem. Eng. Data, 2006, 51, 1161-1167.	700	323.15	1.95036	1.92216	-1.44604	1.90412	-2.3707
778	training	1-hexyl-3-methylimidazolium bis(trifluoromethylsulfonyl)imide	Jason A. Widegren and Joseph W. Magee, Density, Viscosity, Speed of Sound, and Electrolytic Conductivity for the Ionic Liquid 1-hexyl-3-methylimidazolium Bis(trifluoromethylsulfonyl)imide and Its Mixtures with Water, J. Chem. Eng. Data, 52 (2007) 2331-2338.	101.325	293.15	1.95066	2.13432	9.41554	2.09192	7.24192
779	training	1-hexyl-3-methylimidazolium bis(trifluoromethylsulfonyl)imide	Jason A. Widegren and Joseph W. Magee, Density, Viscosity, Speed of Sound, and Electrolytic Conductivity for the Ionic Liquid 1-hexyl-3-methylimidazolium Bis(trifluoromethylsulfonyl)imide and Its Mixtures with Water, J. Chem. Eng. Data, 52 (2007) 2331-2338.	101.325	293.15	1.95202	2.13432	9.3393	2.09192	7.16719
780	training set	1-octyl-3-methylimidazolium bis(trifluoromethylsulfonyl)imide	H. Tokuda, S. Tsuzuki, M. A. B. H. Susan, K. Hayamizu and M. Watanabe, J. Phys. Chem. B, 2006, 110, 19593-19600.	101.325	298.1	1.95424	2.15037	10.0362	2.1548	10.2628
781	training	1-butyl-3-ethylimidazolium trifluoromethanesulfonate	Berthod A, Ruiz-Angel M, Carda-Broch S. Ionic liquids in separation techniques. J. Chromatogr. A. 2008. 1184, 6-18.	101.325	298.15	1.95424	1.82589	-6.56794	2.03116	3.93583
782	training	1-butyl-3-methylimidazolium trifluoromethanesulfonate	O.O. Okoturo, T.J. VanderNoot, Temperature dependence of viscosity for room temperature ionic liquids, Journal of Electroanalytical Chemistry, 568 (2004) 167–181	101.325	293.15	1.95424	1.92504	-1.49446	2.16624	10.8483
783	training	1-hexyl-3-methylimidazolium bis(trifluoromethylsulfonyl)imide	Kandil, M. E.; Marsh, K. N.; Goodwin, A. R. H.; Measurement of the Viscosity, Density, and Electrical Conductivity of 1-hexyl-3-methylimidazolium Bis(trifluorosulfonyl)imide at Temperatures between (288 and 433) K and Pressures below 50 Mpa; J. Chem. Eng. Data, 52 2382-2387.	101.325	293.15	1.95424	2.13432	9.21478	2.09192	7.04515
784	training set	1-hexyl-3-methylimidazolium bi(trifluoromethylsulphonyl)imide	H. Tokuda, S. Tsuzuki, M. A. B. H. Susan, K. Hayamizu and M. Watanabe, J. Phys. Chem. B, 2006, 110, 19593-19600.	101.325	293.1	1.95665	2.13517	9.12385	2.09259	6.94734
785	training set	1-butyl-3-methylimidazolium bis(trifluoromethylsulfonyl)imide	K. R. Harris, M. Kanakubo, L. A. Bis(trifluoromethylsulfonyl)imide. Woolf, J. Chem. Eng. Data, 2007, 52, 1080-1085.	49300	298.15	1.95856	2.10996	7.73041	2.03654	3.98165
786	training	1-(2-hydroxyethyl)-3-methylimidazolium tetrafluoroborate	Branco L C, Rosa J N, Moura Ramos J J, et al. Preparation and characterization of new room temperature ionic liquids. Chem. Eur. J. 2002. 8, 3671-3677.	101.325	293.15	1.95856	2.07349	5.86778	1.97861	1.0235
787	training	1-butyl-3-methylimidazolium hexafluoroantimony	O.O. Okoturo, T.J. VanderNoot, Temperature dependence of viscosity for room temperature ionic liquids, Journal of Electroanalytical Chemistry, 568 (2004) 167–181	101.325	303.15	1.95904	2.30271	17.5429	1.83005	-6.58451
788	training set	1-butyl-3-methylimidazolium tetrafluoroborate	K. R. Seddon, A. S. Stark, M.J. Torres, M. Abraham, L. Moens, Eds., ACS Symposium Series 819, American Chemical Society: Washington DC, 2002, 34-49.	101.325	303.15	1.96095	2.03237	3.64232	2.08128	6.13647
789	training	1-butyl-3-methylimidazolium tetrafluoroborate	M. Brett Meredith, C. Heather McMillen, Jonathan T. Goodman, Timothy P. Hanusa，Ambient temperature imidazolium-based ionic liquids with tetrachloronickelate(II) anions, Polyhedron 28 (2009) 2355-2358.	101.325	303.15	1.96095	2.03237	3.64252	2.08128	6.13668
790	training set	1-ethyl-3-methylimidazolium n-octylsulfate	B. Hasse, J. Lehmann, D. Assenbaum, P. Wasserscheid, A. Leipertz and A. P. Fröba, J. Chem. Eng. Data ,2009, 54, 2576-2583.	101.325	333.15	1.9619	1.28149	-34.6812	1.99987	1.93545
791	training set	1-octyl-3-methyl imidazolium tetrafluoroborate	B. Mokhtarani, M. M. Mojtahedi, H. R. Mortaheb, M. Mafi, F. Yazdani and F. Sadeghian, J. Chem. Eng. Data, 2008, 53, 677-682.	101.325	323.15	1.96355	1.91987	-2.22454	1.90405	-3.03007
792	training	1-butyl-3-methylimidazolium tetrafluoroborate	M. Fukuda , Kajimoto, M. Terazima , Y. Kimura, Application of the transient grating method to the investigation of the photo-thermalization process of malachite green in room temperature ionic liquids, Journal of Molecular Liquids 134 (2007) 49-54.	101.325	298.15	1.96379	2.11737	7.82092	2.13045	8.48696
793	training	1-butyl-3-methylimidazolium tetrafluoroborate	O.O. Okoturo, T.J. VanderNoot, Temperature dependence of viscosity for room temperature ionic liquids, Journal of Electroanalytical Chemistry, 568 (2004) 167–181	101.325	298.15	1.96379	2.11737	7.82092	2.13045	8.48696
794	training set	1-butyl-3-methylimidazolium bis(trifluoromethylsulfonyl)imide	K. R. Harris, M. Kanakubo, L. A. Bis(trifluoromethylsulfonyl)imide. Woolf, J. Chem. Eng. Data, 2007, 52, 1080-1085.	298900	348.15	1.96661	2.21344	12.5509	2.15698	9.68025
795	test set	1,3-dimethylimidazolium methylsulfate	A. B. Pereiro, F. Santamarta, E. Tojo, A. Rodrı´guez, J. Tojo, J. Chem. Eng. Data, 2006, 51, 952-954	101.325	293.15	1.96736	2.30061	16.939	2.17871	10.7428
796	training set	1-butyl-3-methylimidazolium hexafluorophosphate	K. R. Harris, L. A. Woolf and M. Kanakubo, J. Chem. Eng. Data, 2005, 50, 1777-1782.	100600	343.15	1.96802	2.13972	8.72461	2.17941	10.741
797	training set	1-octyl-3-methylimidazolium tetrafluoroborate	K. R. Harris, M. Kanakubo and L. A. Woolf, J. Chem. Eng. Data, 2006, 51, 1161-1167.	4900	323.15	1.97081	1.9382	-1.6546	1.90634	-3.2711
798	training set	1-hexyl-3-methylimidazolium hexafluorophosphate	D.Tomida, A.Kumagai, S. Kenmochi, K. Qiao, C. Yokoyama, J. Chem. Eng. Data, 2007, 52, 577-579.	20000	333.15	1.97174	2.12913	7.98209	2.10386	6.70051
799	training set	1-hexyl-3-methylimidazolium hexafluorophosphate	K. R. Harris, M. Kanakubo, L. A. Bis(trifluoromethylsulfonyl)imide. Woolf, J. Chem. Eng. Data, 2007, 52, 1080-1085.	80800	348.15	1.97405	2.10638	6.70358	2.12806	7.80193
800	training set	1-butylpyridinium tetrafluoroborate	B. Mokhtarani, A. Sharifi, H. R. Mortaheb, M. Mirzaei, M. Mafi and F. Sadeghian, J. Chem. Thermodyn, 2009, 41, 323-329.	101.325	308.15	1.9741	1.96482	-0.47029	1.98022	0.31017
801	training set	1-octyl-3-methylimidazolium tetrafluoroborate	K. R. Harris, M. Kanakubo and L. A. Woolf, J. Chem. Eng. Data, 2006, 51, 1161-1167.	125400	348.15	1.97451	1.97351	-0.05059	2.02005	2.3066
802	training set	1-decyl-3-methylimidazolium bis(trifluoromethylsulfonyl)imide	A. Ahosseini and A. M. Scurto, Int. J. Thermophys, 2008, 29, 1222-1243.	93030	323.15	1.97451	2.17118	9.96031	2.05942	4.30054
803	training set	1-octyl-3-methylimidazolium tetrafluoroborate	K. R. Harris, M. Kanakubo and L. A. Woolf, J. Chem. Eng. Data, 2006, 51, 1161-1167.	50300	333.15	1.97451	1.94163	-1.66527	1.95168	-1.15643
804	training set	1-methyl-3-octylimidazolium hexafluorophosphate	K. R. Seddon, A. S. Stark, M.J. Torres, M. Abraham, L. Moens, Eds., ACS Symposium Series 819, American Chemical Society: Washington DC, 2002, 34-49.	101.325	333.15	1.97543	2.15331	9.00478	2.20212	11.4755
805	training	Tri-ethylsulfonium dicyanoamide	Gerhard D, Alpaslan S C, Gores H J, et al. Trialkylsulfonium dicyanamides - a new family of ionic liquids with very low viscosities. Chem. Commun. 2005. 40, 5080-5082.	101.325	253.15	1.97727	2.7076	36.9363	1.92923	-2.42938
806	training set	1-ethyl-3-methylimidazolium ethylsulfate	H. Rodriguez, J. F. Brennecke, J. Chem. Eng. Data, 2006, 51, 2145-2155.	101.325	298.15	1.97772	2.23012	12.7623	2.09013	5.68374
807	test	1-butyl-3-methylimidazolium hexafluorophosphate	Zhu Jiqin, Chen Jian, Li Chengyue, and Fei Weiyang, Viscosities and Interfacial Properties of 1-Methyl-3-butylimidazolium Hexafluorophosphate and 1-Isobutenyl-3-methylimidazolium tetrafluoroborate Ionic Liquids, J. Chem. Eng. Data, 52 (2007) 812-816.	101.325	313.15	1.97772	2.26582	14.5669	2.16535	9.4872
808	training	1-butyl-3-methylimidazolium hexafluorophosphate	K. S. Mali, G. B. Dutt, and T. Mukherjee, Photoisomerization of cyanine derivatives in 1-butyl-3-methylimidazolium hexafluorophosphate and aqueous glycerol: Influence of specific interactions, J. Chem. Phys., 128 (2008) 124515.	101.325	313	1.98091	2.26837	14.5113	2.16979	9.53511
809	training set	1-ethyl-3-methylimidazolium trifluoromethylsulfonate	H. Rodriguez, J. F. Brennecke, J. Chem. Eng. Data, 2006, 51, 2145-2155.	101.325	278.15	1.98227	2.03231	2.52413	2.13977	7.94523
810	training set	1-butyl-3-methylimidazolium trifluoroacetate	B. D. Fitchett, T. N. Knepp and J. C. Conboy, Journal of the Electrochemical Society, 2004, 151, E219.	101.325	293.1	1.98227	2.04726	3.27852	2.05436	3.63682
811	test set	1-butyl-1-methyl pyrrolidinium bis(trifluoromethylsulfonyl)imide	H. Tokuda, S. Tsuzuki, M. A. B. H. Susan, K. Hayamizu and M. Watanabe, J. Phys. Chem. B, 2006, 110, 19593-19600.	101.325	293.1	1.98318	1.98565	0.12463	1.91189	-3.59452
812	test set	1-butyl-3-methylimidazolium methylsulfate	A. B.Pereiro, P. Verdía, E. Tojo, A. Rodríguez, J. Chem. Eng. Data, 2007, 52, (2), 377-380.	101.325	313.15	1.98601	2.11221	6.3543	1.80652	-9.03748
813	training set	1-butyl-3-methyl imidazolium acetate	J. M. Crosthwaite, M. J. Muldoon, J. N. K. Dixon, J. L. Anderson and J. F. Brennecke, J. Chem. Thermodyn, 2005, 37, 559-568.	101.325	323	1.98677	2.41654	21.6318	2.13889	7.65671
814	training set	1-hexyl-3-methylimidazolium bis(trifluoromethylsulfonyl)imide	A. Muhammad, M. I. Abdul Mutalib, C. D. Wilfred, T. Murugesan and A. Shafeeq, J. Chem. Thermodyn., 2008, 40, 1433–1438.	101.325	288.2	1.98677	2.21847	11.6622	2.15922	8.67984
815	training set	1-butyl-3-methylimidazolium nitrate	B. Mokhtarani, A. Sharifi, H. R. Mortaheb, M. Mirzaei, M. Mafi and F. Sadeghian, J. Chem. Thermodyn, 2009, 41, 1432-1438.	101.325	308.15	1.98887	2.32551	16.9264	1.91626	-3.65089
816	training set	1-ethyl-3-methylimidazolium ethylsulfate	E. Go´mez, B. Gonza´lez, N. Calvar, E. Tojo, A. Domı´nguez, J. Chem. Eng. Data, 2006, 51, 2096-2102	101.325	298.15	1.98936	2.23012	12.1025	2.09013	5.06538
817	training	1-ethyl-3-methylimidazolium ethylsulfate	Gonzalez, E. J., Gonzales, B., Calvar, N., Dominguez, A., Physical Properties of Binary Mixtures of the Ionic Liquid 1-ethyl-3-methylimidazolium Ethyl Sulfate with Several Alcohols at T = (298.15, 313.15, and 328.15) K and Atmospheric Pressure, J. Chem. Eng. Data, 52 1641-1648.	101.325	298.15	1.98936	2.26104	13.6565	2.11463	6.29672
818	training	1-ethyl-3-methylimidazolium ethylsulfate	Calvar, N. Gomez, E. Gonzalez, B. Dominguez, A. Experimental Determination, Correlation, and Prediction of Physical Properties of the Ternary Mixtures Ethanol + Water with 1-octyl-3-methylimidazolium Chloride and 1-ethyl-3-methylimidazolium Ethylsulfate; J. Chem. Eng. Data, 6 (2007) 2529-2535.	101.325	298.15	1.98936	2.26104	13.6565	2.11463	6.29672
819	training set	1-butyl-3-methyl imidazolium octylsulfate	P. Wasserscheid, R. van Hal and A. Bosmann, Green Chem., 2002, 4, 400-404.	101.325	333.1	1.98989	1.43007	-28.1331	2.15522	8.30856
820	training set	1-butyl-3-methylimidazolium hexafluorophosphate	W. Fan, Q. Zhou, J. Sun and S. J. Zhang, J. Chem. Eng. Data, 2009, 54, 2307-2311.	101.325	318.15	1.99026	2.18082	9.57448	2.01699	1.34312
821	training set	1-methyl-3-octylimidazolium hexafluorophosphate	K. R. Harris, M. Kanakubo and L. A. Woolf, J. Chem. Eng. Data, 2006, 51, 1161-1167.	101.325	333.15	1.99034	2.15331	8.1882	2.20212	10.6404
822	training set	1-methyl-3-octylimidazolium hexafluorophosphate	K. R. Harris, M. Kanakubo and L. A. Woolf, J. Chem. Eng. Data, 2006, 51, 1161-1167.	101.325	333.15	1.99034	2.15331	8.1882	2.20212	10.6404
823	training set	1-octyl-3-methylimidazolium hexafluorophosphate	K. R. Harris, M. Kanakubo and L. A. Woolf, J. Chem. Eng. Data, 2006, 51, 1161-1167.	101.325	333.15	1.99078	2.15331	8.16429	2.20212	10.6159
824	training set	1-methyl-3-octylimidazolium hexafluorophosphate	K. R. Harris, M. Kanakubo and L. A. Woolf, J. Chem. Eng. Data, 2006, 51, 1161-1167.	101.325	333.15	1.99078	2.15331	8.16429	2.20212	10.6159
825	test set	1-butyl-1-methyl pyrrolidinium bis(trifluoromethylsulfonyl)imide	A. B. Pereiro, H. I. M. Veiga, J. M. S. S. Esperanca and A. Rodriguez, J. Chem. Thermodyn., 2009, 41, 1419–1423.	101.325	293.15	1.99154	1.9848	-0.33834	1.91119	-4.03466
826	test set	Trimethyl(butyl)ammonium bis(trifluoromethylsulfonyl)imide	H. Tokuda, S. Tsuzuki, M. A. B. H. Susan, K. Hayamizu and M. Watanabe, J. Phys. Chem. B, 2006, 110, 19593-19600.	101.325	298.1	1.99211	1.88508	-5.37291	1.8494	-7.16351
827	training	1-ethyl-3-methylimidazolium ethylsulfate	Glen McHale, Chris Hardacre, Rile Ge, Nicola Doy, Ray W. K.Allen, Jordan M. MacInnes, Mark R.Bown, and MichaelI. Newton, Density-Viscosity Product of Small-Volume Ionic Liquid Samples Using Quartz Crystal Impedance Analysis, Anal. Chem., 80 (2008) 5806-5811.	101.325	298.15	1.993	2.26104	13.4492	2.11463	6.10289
828	test set	1-butyl-3-methylimidazolium tetrafluoroborate	K. R. Harris, M. Kanakubo and L. A. Woolf, J. Chem. Eng. Data, 2007, 52, 2425-2430.	275300	348.15	1.993	2.31863	16.3388	2.19083	9.92639
829	training set	1-butyl-3-methylimidazolium hexafluorophosphate	K. R. Harris, L. A. Woolf and M. Kanakubo, J. Chem. Eng. Data, 2005, 50, 1777-1782.	25800	323.15	1.9952	2.19399	9.96321	1.98349	-0.58713
830	test set	1-butyl-3-methylimidazolium trifluoromethane sulfonate	K. R. Seddon, A. S. Stark, M.J. Torres, M. Abraham, L. Moens, Eds., ACS Symposium Series 819, American Chemical Society: Washington DC, 2002, 34-49.	101.325	293.15	1.99564	1.92504	-3.53786	2.16624	8.54883
831	training	1-ethyl-3-methylimidazolium bis(trifluoromethylsulfonyl)imide	Andreas P. Froba, Heiko Kremer, and Alfred Leipertz, Density, Refractive Index, Interfacial Tension, and Viscosity of Ionic Liquids [EMIM][EtSO4], [EMIM][NTf2], [EMIM][N(CN)2], and [OMA][NTf2] in Dependence on Temperature at Atmospheric Pressure, J. Phys. Chem. B, 112 (2008) 12420-12430.	101.325	273.15	1.99651	2.19929	10.1568	2.20829	10.6076
832	test set	1-octyl-3-methylimidazolium tetrafluoroborate	K. R. Harris, M. Kanakubo and L. A. Woolf, J. Chem. Eng. Data, 2006, 51, 1161-1167.	10500	323.15	1.99695	1.95959	-1.8707	1.91399	-4.15451
833	test set	1-ethyl-3-methylimidazolium methylsulfate	A. J. L. Costa, J. M. S. S. Esperança, I. M. Marrucho and L. s. P. N. Rebelo, J. Chem. Eng. Data, 2011, 56, 3433-3441.	101.325	293.15	1.9987	2.30448	15.2987	2.18045	9.0935
834	training set	1-ethyl-3-methyl imidazolium chloride	K. R. Seddon, A. S. Stark, M.J. Torres, M. Abraham, L. Moens, Eds., ACS Symposium Series 819, American Chemical Society: Washington DC, 2002, 34-49.	101.325	343.15	1.99957	2.49757	24.9055	2.17041	8.54394
835	test set	1-octyl-3-methylimidazolium iodide	M. H. Ghatee, M. Zare, F. Moosavi and A. R. Zolghadr, J. Chem. Eng. Data, 2010, 55, 3084-3088.	101.325	343.15	1.99957	1.98331	-0.81302	2.04909	2.47662
836	training	1-butyl-3-methylimidazolium chloride	Qinglin Kuang, Jun Zhang, and Zhigang Wang, Revealing Long-Range Density Fluctuations in Dialkylimidazolium Chloride Ionic Liquids by Dynamic Light Scattering, J. Phys. Chem. B, 111 (2007) 9858-9863.	101.325	357	2	2.40986	20.4928	1.97763	-1.11836
837	test	1-butyl-3-methylimidazolium chloride	Kuang Q L, Zhang J, Wang Z G. Revealing long-range density fluctuations in dialkylimidazolium chloride ionic liquids by dynamic light scattering. J. Phys. Chem. B. 2007. 111, 9858-9863.	101.325	357	2	2.40986	20.4928	1.97763	-1.11836
838	training set	1-butyl-3-methylimidazolium iodide	M. H. Ghatee, M. Zare, F. Moosavi and A. R. Zolghadr, J. Chem. Eng. Data, 2010, 55, 3084-3088.	101.325	328.15	2.00173	2.01082	0.45396	1.79053	-10.5507
839	training	1-ethyl-3-methylimidazolium ethylsulfate	Arce, A., Rodil, E., Soto, A., Volumetric and Viscosity Study for the Mixtures of 2-Ethoxy-2-methylpropane, Ethanol, and 1-ethyl-3-methylimidazolium Ethyl Sulfate Ionic Liquid, J. Chem. Eng. Data 51 1453-1457.	101.325	298.15	2.00173	2.23012	11.4096	2.09013	4.41591
840	test	1-ethyl-3-methylimidazolium ethylsulfate	Arce, A. Rodriquez, H. Soto, A. Use of a green and cheap ionic liquid to purify gasoline octane boosters, Green Chem., 9 247-253.	101.325	298.15	2.00173	2.23012	11.4096	2.09013	4.41591
841	training set	1-hexyl-2,3-dimethylimidazolium bis(trifluoromethylsulfonyl)imide	J. M. Crosthwaite, M. J. Muldoon, J. N. K. Dixon, J. L. Anderson and J. F. Brennecke, J. Chem. Thermodyn, 2005, 37, 559-568.	101.325	303	2.00432	1.98769	-0.82962	1.95653	-2.38427
842	training set	1-ethyl-3-methyl imidazolium hydrogen sulfate	A. J. L. Costa, J. M. S. S. Esperança, I. M. Marrucho and L. s. P. N. Rebelo, J. Chem. Eng. Data, 2011, 56, 3433-3441.	101.325	353.15	2.00518	2.15529	7.48626	2.05981	2.72425
843	test set	1-butyl-3-methylimidazolium tetrafluoroborate	K. R. Harris, M. Kanakubo and L. A. Woolf, J. Chem. Eng. Data, 2007, 52, 2425-2430.	125543	323.15	2.00647	2.17156	8.22795	2.224	10.8413
844	training set	1-hexyl-3-methylimidazolium tetrafluoroborate	A. Muhammad, M. I. Abdul Mutalib, C. D. Wilfred, T. Murugesan and A. Shafeeq, J. Chem. Thermodyn., 2008, 40, 1433–1438.	101.325	298.2	2.0086	2.24382	11.7106	2.17572	8.32
845	training	Methyl-(2-methoxyethyl)piperidinium bis((trifluoromethyl)sulfonyl)imide	Zhou Z B, Matsumoto H, Tatsumi K. Cyclic quaternary ammonium ionic liquids with perfluoroalkyltrifluoroborates: Synthesis, characterization, and properties. Chem. Eur. J. 2006. 12, 2196-2212.	101.325	298.15	2.0086	1.78957	-10.9045	1.73695	-13.5243
846	test	Methyldiethylsulfonium dicyanoamide	Gerhard D, Alpaslan S C, Gores H J, et al. Trialkylsulfonium dicyanamides - a new family of ionic liquids with very low viscosities. Chem. Commun. 2005. 40, 5080-5082.	101.325	253.15	2.0086	2.70799	34.8198	1.92987	-3.9196
847	training set	1-butyl-3-methylimidazolium trifluoroacetate	H. Tokuda, K. Hayamizu, K. Ishii, Md. A. B. H. Susan, M. Watanabe, J. Phys. Chem. B, 2004, 108, 16593-16600.	101.325	293.1	2.0103	2.04726	1.83848	2.05436	2.19179
848	training set	1-octyl-3-methylimidazolium tetrafluoroborate	Y. A. Sanmamed, D. Gonzalez-Salgado, J. Troncoso, C. A. Cerdeirina and L. Romani, Fluid Phase Equilibria, 2007, 252, 96-102.	101.325	313.15	2.01242	2.08987	3.8486	2.12898	5.79225
849	training	1-Propyl-3-methylimidazolium tetrafluoroborate	Zhou Z B, Matsumoto H, Tatsumi K. Low-melting, low-viscous, hydrophobic ionic liquids: 1-alkyl(alkyl ether)-3-methylimidazolium perfluoroalkyltrifluoroborate. Chem. Eur. J. 2004. 10, 6581-6591.	101.325	298.15	2.01284	2.02331	0.5201	2.08811	3.73957
850	test set	1-propyl-3-methyl imidazolium tetrafluoroborate	T. Nishida, Y. Tashiro and M. Yamamoto, Journal of Fluorine Chemistry, 2003, 120, 135-141.	101.325	298.1	2.01284	2.02416	0.56219	2.08856	3.76187
851	test set	1-hexyl-3-methylimidazolium tetrafluoroborate	Y. A. Sanmamed, D. Gonzalez-Salgado, J. Troncoso, C. A. Cerdeirina and L. Romani, Fluid Phase Equilibria, 2007, 252, 96-102.	101.325	308.15	2.01284	2.07467	3.07178	1.96567	-2.34346
852	training	1-butyl-3-methylimidazolium acetate	Ramesh L. Gardas, Joao A.P. Coutinho, A group contribution method for viscosity estimation of ionic liquids, Fluid Phase Equilibria, 266 (2008) 195-201.	101.325	323.15	2.01703	2.41399	19.6804	2.13769	5.98211
853	test	1-butyl-3-methylimidazolium hexafluorophosphate	Zhu Jiqin, Chen Jian, Li Chengyue, and Fei Weiyang, Viscosities and Interfacial Properties of 1-Methyl-3-butylimidazolium Hexafluorophosphate and 1-Isobutenyl-3-methylimidazolium tetrafluoroborate Ionic Liquids, J. Chem. Eng. Data, 52 (2007) 812-816.	101.325	311.15	2.01703	2.29982	14.0198	2.22333	10.2275
854	training set	1-butyl-3-methylimidazolium methylsulfate	A. Ferna´ndez, J. Garcı´a, J. S. Torrecilla,*M. Oliet, F. Rodrı´guez, J. Chem. Eng. Data, 2008, 53, 1518–1522	101.325	313.15	2.01787	2.11221	4.67508	1.80652	-10.4737
855	test set	1-butyl-3-methylimidazolium chloride	K. R. Seddon, A. S. Stark, M.J. Torres, M. Abraham, L. Moens, Eds., ACS Symposium Series 819, American Chemical Society: Washington DC, 2002, 34-49.	101.325	363.15	2.02119	2.30531	14.0568	1.85866	-8.04116
856	training set	1-hexyl pyridinium bis((trifluoromethyl)sulfonyl)amide	J. M. Crosthwaite, M. J. Muldoon, J. N. K. Dixon, J. L. Anderson and J. F. Brennecke, J. Chem. Thermodyn, 2005, 37, 559-568.	101.325	293	2.02531	2.10424	3.89737	2.02089	-0.21833
857	training set	1-hexyl-3-methylimidazolium tetrafluoroborate	K. R. Seddon, A. S. Stark, M.J. Torres, M. Abraham, L. Moens, Eds., ACS Symposium Series 819, American Chemical Society: Washington DC, 2002, 34-49.	101.325	313.15	2.02531	1.98967	-1.75973	1.84596	-8.85541
858	training set	1-butyl-3-methylimidazolium bis(trifluoromethylsulfonyl)imide	K. R. Harris, M. Kanakubo, L. A. Bis(trifluoromethylsulfonyl)imide. Woolf, J. Chem. Eng. Data, 2007, 52, 1080-1085.	100	283.15	2.02572	2.17702	7.46898	2.13508	5.39878
859	training	1-butyl-3-methylimidazolium tetrafluoroborate	L.A.S. Ries , F.A. do Amaral, K. Matos, E.M.A. Martini, M.O. de Souza, R.F. de Souza, Evidence of change in the molecular organization of 1-butyl-3-methylimidazolium tetrafluoroborate ionic liquid solutions with the addition of water, Polyhedron, 27 (2008) 3287-3293.	101.325	298.15	2.02865	2.11737	4.37342	2.13045	5.01816
860	test set	1-butyl-3-methylimidazolium bis(trifluoromethylsulfonyl)imide	H. Tokuda, K. Hayamizu, K. Ishii, M. A. B. H. Susan and M. Watanabe, J. Phys. Chem. B, 2005, 109, 6103-6110.	101.325	283.15	2.02938	2.17703	7.27541	2.13508	5.20871
861	test	1-butyl-3-methylimidazolium trifluoromethanesulfonate	O.O. Okoturo, T.J. VanderNoot, Temperature dependence of viscosity for room temperature ionic liquids, Journal of Electroanalytical Chemistry, 568 (2004) 167–181	101.325	288.15	2.02938	2.01004	-0.95333	2.25192	10.9657
862	training set	1-ethyl-3-methylimidazolium n-butylsulfate	A. J. L. Costa, J. M. S. S. Esperança, I. M. Marrucho and L. s. P. N. Rebelo, J. Chem. Eng. Data, 2011, 56, 3433-3441.	101.325	308.15	2.03019	1.94469	-4.21133	1.81796	-10.4535
863	training set	1-butyl-3-methylimidazolium tetrafluoroborate	K. R. Harris, M. Kanakubo and L. A. Woolf, J. Chem. Eng. Data, 2007, 52, 2425-2430.	100	298.15	2.03342	2.11737	4.12846	2.13045	4.77186
864	training set	1-butyl-3-methylimidazolium tetrafluoroborate	K. R. Harris, M. Kanakubo and L. A. Woolf, J. Chem. Eng. Data, 2007, 52, 2425-2430.	100	298.15	2.03342	2.11737	4.12846	2.13045	4.77186
865	training	1-butyl-3-methylimidazolium hexafluoroantimony	O.O. Okoturo, T.J. VanderNoot, Temperature dependence of viscosity for room temperature ionic liquids, Journal of Electroanalytical Chemistry, 568 (2004) 167–181	101.325	298.15	2.03342	2.38771	17.4233	1.93846	-4.67005
866	test set	1-butyl-3-methylimidazolium octylsulfate	J. Jacquemin, P. Husson, V. Majer, A. A. H. Padua and M. F. C. Gomes, Green Chem., 2008, 10, 944-950.	101.325	333.04	2.03342	1.43109	-29.6214	2.15572	6.0146
867	training set	1-decyl-3-methylimidazolium bis(trifluoromethylsulfonyl)imide	A. Ahosseini and A. M. Scurto, Int. J. Thermophys, 2008, 29, 1222-1243.	100	298.15	2.03423	2.24118	10.1736	2.00688	-1.34434
868	test set	1-butyl-3-methylimidazolium tetrafluoroborate	K. R. Harris, M. Kanakubo and L. A. Woolf, J. Chem. Eng. Data, 2007, 52, 2425-2430.	100	298.15	2.03543	2.11737	4.02564	2.13045	4.6684
869	training set	1-butyl-3-methylimidazolium tetrafluoroborate	K. R. Harris, M. Kanakubo and L. A. Woolf, J. Chem. Eng. Data, 2007, 52, 2425-2430.	500	298.15	2.03583	2.1189	4.08025	2.13095	4.67223
870	training set	1-butyl-3-methylimidazolium tetrafluoroborate	K. R. Harris, M. Kanakubo and L. A. Woolf, J. Chem. Eng. Data, 2007, 52, 2425-2430.	100	298.15	2.03623	2.11737	3.98477	2.13045	4.62728
871	training	1-butyl-3-methylimidazolium hexafluorophosphate	Pereiro, A. B.; Legido, J. L.; Rodriguez, A.; Physical properties of ionic liquids based on 1-alkyl-3-methylimidazolium cation and hexafluorophosphate as anion and temperature dependence; J. Chem. Thermodyn. 39 1168-1175.	101.325	313.15	2.03703	2.26582	11.2315	2.16535	6.29968
872	training	1-butyl-3-methylimidazolium hexafluorophosphate	O.O. Okoturo, T.J. VanderNoot, Temperature dependence of viscosity for room temperature ionic liquids, Journal of Electroanalytical Chemistry, 568 (2004) 167–181	101.325	313.15	2.03743	2.26582	11.2098	2.16535	6.27889
873	training set	1-butyl-3-methylimidazolium hexafluorophosphate	K. R. Harris, L. A. Woolf and M. Kanakubo, J. Chem. Eng. Data, 2005, 50, 1777-1782.	75700	333.15	2.0406	2.2146	8.5271	2.18379	7.01695
874	training set	1-butyl-3-methylimidazolium nitrate	K. R. Seddon, A. S. Stark, M.J. Torres, M. Abraham, L. Moens, Eds., ACS Symposium Series 819, American Chemical Society: Washington DC, 2002, 34-49.	101.325	323.15	2.04139	2.19781	7.66243	1.91245	-6.31609
875	training set	1-ethyl-3-methylimidazolium tetrafluoroborate	K. R. Seddon, A. S. Stark, M.J. Torres, M. Abraham, L. Moens, Eds., ACS Symposium Series 819, American Chemical Society: Washington DC, 2002, 34-49.	101.325	283.15	2.04139	2.22464	8.97683	2.19294	7.42372
876	training set	1-hexyl-3-methylimidazolium tetrafluoroborate	E. Rilo, J. Vila, J. Pico, S. Garcia-Garabal, L. Segade, L. M. Varela and O. Cabeza, J. Chem. Eng. Data, 55, 639-644.	101.325	308.15	2.04273	2.07467	1.5636	1.96567	-3.77241
877	training set	1-hexyl-3-methylimidazolium iodide	M. H. Ghatee, M. Zare, F. Moosavi and A. R. Zolghadr, J. Chem. Eng. Data, 2010, 55, 3084-3088.	101.325	338.15	2.04415	1.96811	-3.71973	1.99336	-2.48477
878	training set	1-decyl-3-methylimidazolium bis(trifluoromethylsulfonyl)imide	A. Ahosseini and A. M. Scurto, Int. J. Thermophys, 2008, 29, 1222-1243.	109800	323.15	2.04454	2.23524	9.32722	2.13874	4.60717
879	training	1-hexyl-3-methylimidazolium bis(trifluoromethylsulfonyl)imide	Kandil, M. E.; Marsh, K. N.; Goodwin, A. R. H.; Measurement of the Viscosity, Density, and Electrical Conductivity of 1-hexyl-3-methylimidazolium Bis(trifluorosulfonyl)imide at Temperatures between (288 and 433) K and Pressures below 50 Mpa; J. Chem. Eng. Data, 52 2382-2387.	101.325	288.15	2.04532	2.21932	8.50715	2.15995	5.6044
880	training set	1-decyl-3-methylimidazolium bis(trifluoromethylsulfonyl)imide	A. Ahosseini and A. M. Scurto, Int. J. Thermophys, 2008, 29, 1222-1243.	2950	298.15	2.04727	2.25207	10.0037	2.00959	-1.84068
881	training set	1-butyl-3-methyl imidazolium bis(pentafluoroethylsulfonyl)imide	H. Tokuda, S. Tsuzuki, M. A. B. H. Susan, K. Hayamizu and M. Watanabe, J. Phys. Chem. B, 2006, 110, 19593-19600.	101.325	298.1	2.04766	1.83784	-10.2468	1.97759	-3.42207
882	training set	1-hexyl-3-methylimidazolium hexafluorophosphate	A. B. Pereiro and J. L. Legido, J. Chem. Thermodyn., 2007, 39, 1168–1175.	101.325	323.15	2.04883	2.22311	8.50647	2.24335	9.49409
883	training	1-hexyl-3-methylimidazolium hexafluorophosphate	Pereiro, A. B.; Legido, J. L.; Rodriguez, A.; Physical properties of ionic liquids based on 1-alkyl-3-methylimidazolium cation and hexafluorophosphate as anion and temperature dependence; J. Chem. Thermodyn. 39 1168-1175.	101.325	323.15	2.04883	2.22311	8.50646	2.24335	9.49408
884	training set	1-octyl-3-methylpyridinium bis(trifluoromethylsulfonyl)imide	J. M. Crosthwaite, M. J. Muldoon, J. N. K. Dixon, J. L. Anderson and J. F. Brennecke, J. Chem. Thermodyn, 2005, 37, 559-568.	101.325	298	2.04922	2.13035	3.95915	2.14826	4.83314
885	training	Methyl-(2-methoxyethyl)piperidinium pentafluoroethyltrifluoroborate	Zhou Z B, Matsumoto H, Tatsumi K. Cyclic quaternary ammonium ionic liquids with perfluoroalkyltrifluoroborates: Synthesis, characterization, and properties. Chem. Eur. J. 2006. 12, 2196-2212.	101.325	298.15	2.04922	1.43556	-29.946	1.83822	-10.2966
886	training	1-butyl-3-methylimidazolium tetrafluoroborate	Debbie S. Silvester , Kristopher R. Ward , Leigh Aldous , Christopher Hardacre , Richard G. Compton,The electrochemical oxidation of hydrogen at activated platinum electrodes in room temperature ionic liquids as solvents, Journal of Electroanalytical Chemistry, 618 (2008) 53-60.	101.325	293	2.04922	2.20492	7.59831	2.19167	6.95168
887	training	1-butyl-3-methylimidazolium tetrafluoroborate	O.O. Okoturo, T.J. VanderNoot, Temperature dependence of viscosity for room temperature ionic liquids, Journal of Electroanalytical Chemistry, 568 (2004) 167–181	101.325	293.15	2.04922	2.20237	7.47388	2.18933	6.83747
888	test set	1-butyl-3-methylimidazolium trifluoromethylsulfonate	H. Tokuda, S. Tsuzuki, M. A. B. H. Susan, K. Hayamizu and M. Watanabe, J. Phys. Chem. B, 2006, 110, 19593-19600.	101.325	293.1	2.04999	1.92589	-6.05383	2.16712	5.7138
889	test set	1-methyl-3-octylimidazolium hexafluorophosphate	K. R. Harris, M. Kanakubo and L. A. Woolf, J. Chem. Eng. Data, 2006, 51, 1161-1167.	101.325	343.15	2.05192	1.98331	-3.34355	2.04909	-0.13784
890	training set	1-decyl-3-methylimidazolium bis(trifluoromethylsulfonyl)amide	A. Ahosseini and A. M. Scurto, Int. J. Thermophys, 2008, 29, 1222-1243.	4270	298.15	2.05231	2.25711	9.9792	2.0112	-2.00325
891	test set	1-ethyl-3-methylimidazolium n-octylsulfate	B. Hasse, J. Lehmann, D. Assenbaum, P. Wasserscheid, A. Leipertz and A. P. Fröba, J. Chem. Eng. Data ,2009, 54, 2576-2583.	101.325	328.15	2.05652	1.36649	-33.5533	1.98182	-3.63217
892	test	1-propyl-3-methylimidazolium iodide	Philipp Wachter, Markus Zistler, Christian Schreiner, Matthias Fleischmann, Dirk Gerhard, Peter Wasserscheid,Joseph Barthel, and Heiner J. Gores, Temperature Dependence of the Non-Stokesian Charge Transport in Binary Blends of Ionic Liquids, J. Chem. Eng. Data, 54 (2009) 491-497.	101.325	333.15	2.05652	1.83175	-10.9298	1.7434	-15.2258
893	training set	1-ethyl-3-methylpyridinium ethylsulfate	J. M. Crosthwaite, M. J. Muldoon, J. N. K. Dixon, J. L. Anderson and J. F. Brennecke, J. Chem. Thermodyn, 2005, 37, 559-568.	101.325	303	2.0569	2.13143	3.62317	2.01863	-1.86068
894	training set	1-hexyl-3-methyl imidazolium chloride	K. R. Seddon, A. S. Stark, M.J. Torres, M. Abraham, L. Moens, Eds., ACS Symposium Series 819, American Chemical Society: Washington DC, 2002, 34-49.	101.325	363.15	2.0569	2.4326	18.2654	1.99643	-2.94007
895	test set	1-butyl-3-methylimidazolium tetrafluoroborate	K. R. Harris, M. Kanakubo and L. A. Woolf, J. Chem. Eng. Data, 2007, 52, 2425-2430.	300000	348.15	2.0569	2.41299	17.3118	2.22634	8.23741
896	test	1-butyl-3-methylimidazolium tetrafluoroborate	Hui Jin, Bernie O’Hare, Jing Dong, Sergei Arzhantsev, Gary A. Baker, James F. Wishart,Alan J. Benesi, and Mark Maroncelli, Physical Properties of Ionic Liquids Consisting of the 1-butyl-3-Methylimidazolium Cation with Various Anions and the Bis(trifluoromethylsulfonyl)imide Anion with Various Cations, J. Phys. Chem. B, 112 (2008) 81-92.	101.325	298.15	2.0569	2.11737	2.93982	2.13045	3.5757
897	training set	1-octyl-3-methylimidazolium tetrafluoroborate	K. R. Harris, M. Kanakubo and L. A. Woolf, J. Chem. Eng. Data, 2006, 51, 1161-1167.	150400	348.15	2.05805	2.06901	0.53259	2.08274	1.19986
898	training set	1-octyl-3-methylimidazolium bis(trifluoromethylsulfonyl)amide	H. Tokuda, S. Tsuzuki, M. A. B. H. Susan, K. Hayamizu and M. Watanabe, J. Phys. Chem. B, 2006, 110, 19593-19600.	101.325	293.1	2.06108	2.23537	8.45633	2.27293	10.2784
899	test set	1-octyl-3-methylimidazolium hexafluorophosphate	K. R. Harris, M. Kanakubo and L. A. Woolf, J. Chem. Eng. Data, 2006, 51, 1161-1167.	101.325	333.15	2.06145	2.15331	4.45624	2.20212	6.82383
900	training	1-hexyl-3-methylimidazolium bis(trifluoromethylsulfonyl)imide	Jason A. Widegren and Joseph W. Magee, Density, Viscosity, Speed of Sound, and Electrolytic Conductivity for the Ionic Liquid 1-hexyl-3-methylimidazolium Bis(trifluoromethylsulfonyl)imide and Its Mixtures with Water, J. Chem. Eng. Data, 52 (2007) 2331-2338.	101.325	288.15	2.06371	2.21932	7.54046	2.15995	4.66357
901	training set	1-butyl-3-methylimidazolium hexafluorophosphate	K. R. Harris, L. A. Woolf and M. Kanakubo, J. Chem. Eng. Data, 2005, 50, 1777-1782.	125400	343.15	2.06521	2.23446	8.1952	2.2599	9.42715
902	training set	1-octyl-3-methylimidazolium tetrafluoroborate	B. Mokhtarani, M. M. Mojtahedi, H. R. Mortaheb, M. Mafi, F. Yazdani and F. Sadeghian, J. Chem. Eng. Data, 2008, 53, 677-682.	101.325	318.15	2.06588	2.00487	-2.95322	2.00142	-3.12006
903	training set	1-hexyl-3-methylimidazolium hexafluorophosphate	K. R. Harris, M. Kanakubo, L. A. Bis(trifluoromethylsulfonyl)imide. Woolf, J. Chem. Eng. Data, 2007, 52, 1080-1085.	100	323.15	2.06819	2.22311	7.49051	2.24335	8.46905
904	training set	1-hexyl-3-methylimidazolium hexafluorophosphate	K. R. Harris, M. Kanakubo, L. A. Bis(trifluoromethylsulfonyl)imide. Woolf, J. Chem. Eng. Data, 2007, 52, 1080-1085.	100	323.15	2.06819	2.22311	7.49051	2.24335	8.46905
905	training set	1-decyl-3-methylimidazolium bis(trifluoromethylsulfonyl)imide	A. Ahosseini and A. M. Scurto, Int. J. Thermophys, 2008, 29, 1222-1243.	6900	298.15	2.07041	2.26716	9.50298	2.01508	-2.67258
906	training set	1-octyl-3-methyl imidazolium tetrafluoroborate	K. R. Harris, M. Kanakubo and L. A. Woolf, J. Chem. Eng. Data, 2006, 51, 1161-1167.	25800	323.15	2.07262	2.01804	-2.63343	1.96018	-5.42511
907	training set	1-hexyl-3-methylimidazolium hexafluorophosphate	K. R. Harris, M. Kanakubo, L. A. Bis(trifluoromethylsulfonyl)imide. Woolf, J. Chem. Eng. Data, 2007, 52, 1080-1085.	7600	323.15	2.07298	2.25176	8.6242	2.25475	8.76867
908	training set	1-hexyl-3-methylimidazolium hexafluorophosphate	K. R. Harris, M. Kanakubo, L. A. Bis(trifluoromethylsulfonyl)imide. Woolf, J. Chem. Eng. Data, 2007, 52, 1080-1085.	40500	333.15	2.07372	2.20744	6.44812	2.16996	4.64076
909	training set	1-octyl-3-methylimidazolium tetrafluoroborate	K. R. Harris, M. Kanakubo and L. A. Woolf, J. Chem. Eng. Data, 2006, 51, 1161-1167.	75600	333.15	2.07445	2.03827	-1.74384	2.0605	-0.6727
910	training set	1-octyl-3-methylimidazolium bis(trifluoromethylsulfonyl)amide	H. Tokuda, K. Hayamizu, K. Ishii, M. A. B. H. Susan and M. Watanabe, J. Phys. Chem. B, 2005, 109, 6103-6110.	101.325	293.15	2.075	2.23452	7.68779	2.27192	9.49023
911	training set	1-butyl-3-methylimidazolium hexafluorophosphate	D.Tomida, A.Kumagai, K.Qiao, C.Yokoyama, Int. J. Thermophys, 2006, 27, 39-47.	100	313.15	2.07555	2.26581	9.16682	2.16535	4.32665
912	training set	1-hexyl-3-methylimidazolium hexafluorophosphate	K. R. Harris, M. Kanakubo, L. A. Bis(trifluoromethylsulfonyl)imide. Woolf, J. Chem. Eng. Data, 2007, 52, 1080-1085.	100	323.15	2.07628	2.22311	7.07169	2.24335	8.04641
913	training	1-butyl-3-methylimidazolium tetrafluoroborate	Michael E. Van Valkenburg, Robert L. Vaughn, Margaret Williams, John S. Wilkes, Thermochemistry of ionic liquid heat-transfer fluids, Thermochimica Acta, 425 (2005) 181-188.	101.325	298	2.07838	2.11992	1.99866	2.13187	2.57343
914	training set	1-butyl-3-methylimidazolium hexafluorophosphate	K. R. Harris, L. A. Woolf and M. Kanakubo, J. Chem. Eng. Data, 2005, 50, 1777-1782.	100	313.15	2.07918	2.26581	8.97623	2.16535	4.14451
915	training set	1-butyl-3-methylimidazolium hexafluorophosphate	K. R. Harris, L. A. Woolf and M. Kanakubo, J. Chem. Eng. Data, 2005, 50, 1777-1782.	100	313.15	2.07918	2.26581	8.97623	2.16535	4.14451
916	training	Ethyldimethylsulfonium dicyanoamide	Gerhard D, Alpaslan S C, Gores H J, et al. Trialkylsulfonium dicyanamides - a new family of ionic liquids with very low viscosities. Chem. Commun. 2005. 40, 5080-5082.	101.325	253.15	2.07918	2.70761	30.225	1.92926	-7.21059
917	test	1-butyl-3-methylimidazolium hexafluorophosphate	Qi M Y, Wu G Z, Li Q M, et al. Gamma-radiation effect on ionic liquid [bmim] [BF4]. Radiat. Phys. Chem. 2008. 77, 877-883.	101.325	313.15	2.08171	2.26582	8.84417	2.16535	4.01819
918	training set	1-ethyl-3-methyl imidazolium hydrogen sulfate	A. J. L. Costa, J. M. S. S. Esperança, I. M. Marrucho and L. s. P. N. Rebelo, J. Chem. Eng. Data, 2011, 56, 3433-3441.	101.325	348.15	2.0835	2.24029	7.52546	2.11558	1.53964
919	training set	1-decyl-3-methylimidazolium bis(trifluoromethylsulfonyl)amide	A. Ahosseini and A. M. Scurto, Int. J. Thermophys, 2008, 29, 1222-1243.	122570	323.15	2.08849	2.28402	9.36227	2.17978	4.37105
920	training set	1-butylpyridinium tetrafluoroborate	B. Mokhtarani, A. Sharifi, H. R. Mortaheb, M. Mirzaei, M. Mafi and F. Sadeghian, J. Chem. Thermodyn, 2009, 41, 323-329.	101.325	303.15	2.08987	2.04982	-1.91658	2.0575	-1.54903
921	training set	1-butyl-3-methylimidazolium bis(trifluoromethylsulfonyl)imide	K. R. Harris, M. Kanakubo, L. A. Bis(trifluoromethylsulfonyl)imide. Woolf, J. Chem. Eng. Data, 2007, 52, 1080-1085.	200300	323.15	2.09061	2.26178	8.18779	2.07826	-0.59091
922	training set	1-butyl-3-methylimidazolium tetrafluoroborate	K. R. Harris, M. Kanakubo and L. A. Woolf, J. Chem. Eng. Data, 2007, 52, 2425-2430.	150422	323.15	2.09061	2.2666	8.41807	2.30297	10.158
923	test	1-butyl-3-methylimidazolium hexafluorophosphate	Zhu Jiqin, Chen Jian, Li Chengyue, and Fei Weiyang, Viscosities and Interfacial Properties of 1-Methyl-3-butylimidazolium Hexafluorophosphate and 1-Isobutenyl-3-methylimidazolium tetrafluoroborate Ionic Liquids, J. Chem. Eng. Data, 52 (2007) 812-816.	101.325	308.15	2.09061	2.35082	12.4464	2.30216	10.119
924	training set	1-butyl-3-methylimidazolium hexafluorophosphate	W. Fan, Q. Zhou, J. Sun and S. J. Zhang, J. Chem. Eng. Data, 2009, 54, 2307-2311.	101.325	313.15	2.09124	2.26582	8.34802	2.16535	3.54403
925	training set	1-butyl-3-methylimidazolium methylsulfate	A. B.Pereiro, P. Verdía, E. Tojo, A. Rodríguez, J. Chem. Eng. Data, 2007, 52, (2), 377-380.	101.325	308.15	2.09248	2.19721	5.00493	1.92399	-8.05199
926	training set	1-butyl-3-methylimidazolium bis(trifluoromethylsulfonyl)imide	K. R. Harris, M. Kanakubo, L. A. Bis(trifluoromethylsulfonyl)imide. Woolf, J. Chem. Eng. Data, 2007, 52, 1080-1085.	76900	298.15	2.09342	2.2154	5.82667	2.17542	3.91698
927	training	1-butyl-3-methylimidazolium hexafluorophosphate	K. S. Mali, G. B. Dutt, and T. Mukherjee, Photoisomerization of cyanine derivatives in 1-butyl-3-methylimidazolium hexafluorophosphate and aqueous glycerol: Influence of specific interactions, J. Chem. Phys., 128 (2008) 124515.	101.325	308	2.09447	2.35337	12.3609	2.30575	10.0875
928	training set	1-hexyl-3-methylimidazolium hexafluoroborate	K. R. Seddon, A. S. Stark, M.J. Torres, M. Abraham, L. Moens, Eds., ACS Symposium Series 819, American Chemical Society: Washington DC, 2002, 34-49.	101.325	323.15	2.09691	2.22311	6.01853	2.24335	6.9835
929	training	1-ethyl-3-methylimidazolium ethylsulfate	Andreas P. Froba, Heiko Kremer, and Alfred Leipertz, Density, Refractive Index, Interfacial Tension, and Viscosity of Ionic Liquids [EMIM][EtSO4], [EMIM][NTf2], [EMIM][N(CN)2], and [OMA][NTf2] in Dependence on Temperature at Atmospheric Pressure, J. Phys. Chem. B, 112 (2008) 12420-12430.	101.325	293.15	2.0983	2.34604	11.8067	2.11835	0.95556
930	training set	1-butyl-3-methylimidazolium hexafluorophosphate	D.Tomida, A.Kumagai, K.Qiao, C.Yokoyama, Int. J. Thermophys, 2006, 27, 39-47.	5000	313.15	2.10037	2.28453	8.76798	2.17586	3.59397
931	training set	1-butyl-3-methylimidazolium nitrate	B. Mokhtarani, A. Sharifi, H. R. Mortaheb, M. Mirzaei, M. Mafi and F. Sadeghian, J. Chem. Thermodyn, 2009, 41, 1432-1438.	101.325	303.15	2.10302	2.41051	14.6215	2.06424	-1.84383
932	test	1-butyl-3-methylimidazolium hexafluoroantimony	O.O. Okoturo, T.J. VanderNoot, Temperature dependence of viscosity for room temperature ionic liquids, Journal of Electroanalytical Chemistry, 568 (2004) 167–181	101.325	293.15	2.1038	2.47271	17.5354	2.04958	-2.57757
933	test	1-butyl-3-methylimidazolium hexafluorophosphate	O.O. Okoturo, T.J. VanderNoot, Temperature dependence of viscosity for room temperature ionic liquids, Journal of Electroanalytical Chemistry, 568 (2004) 167–181	101.325	308.15	2.1038	2.35082	11.7413	2.30216	9.42845
934	training set	1-butyl-3-methylimidazolium hexafluorophosphate	K. R. Harris, L. A. Woolf and M. Kanakubo, J. Chem. Eng. Data, 2005, 50, 1777-1782.	50800	323.15	2.10653	2.28949	8.68518	2.17468	3.23512
935	test set	1-butyl-3-methylimidazolium iodide	M. H. Ghatee, M. Zare, F. Moosavi and A. R. Zolghadr, J. Chem. Eng. Data, 2010, 55, 3084-3088.	101.325	323.15	2.10687	2.09582	-0.52461	1.88711	-10.4305
936	training set	1-dodecyl-3-methyl imidazolium hexafluorophosphate	K. R. Seddon, A. S. Stark, M.J. Torres, M. Abraham, L. Moens, Eds., ACS Symposium Series 819, American Chemical Society: Washington DC, 2002, 34-49.	101.325	343.15	2.10721	2.17152	3.05195	1.89506	-10.0677
937	training set	1-butyl-3-methylimidazolium hexafluorophosphate	K. R. Harris, L. A. Woolf and M. Kanakubo, J. Chem. Eng. Data, 2005, 50, 1777-1782.	91100	333.15	2.10721	2.27343	7.88825	2.27298	7.86674
938	test set	1-ethyl-3-methylimidazolium methylsulfate	A. J. L. Costa, J. M. S. S. Esperança, I. M. Marrucho and L. s. P. N. Rebelo, J. Chem. Eng. Data, 2011, 56, 3433-3441.	101.325	288.15	2.10924	2.38948	13.2861	2.30216	9.14653
939	training set	1-hexyl-2,3-dimethylimidazolium bis(trifluoromethylsulfonyl)imide	J. M. Crosthwaite, M. J. Muldoon, J. N. K. Dixon, J. L. Anderson and J. F. Brennecke, J. Chem. Thermodyn, 2005, 37, 559-568.	101.325	298	2.11727	2.07269	-2.10546	2.06378	-2.52614
940	training	1-butyl-3-methylimidazolium trifluoromethanesulfonate	O.O. Okoturo, T.J. VanderNoot, Temperature dependence of viscosity for room temperature ionic liquids, Journal of Electroanalytical Chemistry, 568 (2004) 167–181	101.325	283.15	2.11727	2.09504	-1.05014	2.32818	9.96118
941	training set	1-octyl-3-methylimidazolium tetrafluoroborate	Y. A. Sanmamed, D. Gonzalez-Salgado, J. Troncoso, C. A. Cerdeirina and L. Romani, Fluid Phase Equilibria, 2007, 252, 96-102.	101.325	308.15	2.11793	2.17487	2.68848	2.27362	7.35099
942	training set	N-butyl-3-methylpyridinium tetrafluoroborate	J. M. Crosthwaite, M. J. Muldoon, J. N. K. Dixon, J. L. Anderson and J. F. Brennecke, J. Chem. Thermodyn, 2005, 37, 559-568.	101.325	310.65	2.12057	1.87479	-11.5903	1.97348	-6.93611
943	training set	1-butyl-3-methylimidazolium tetrafluoroborate	D.Tomida, A.Kumagai, K.Qiao, C.Yokoyama, Int. J. Thermophys, 2006, 27, 39-47.	100	293.15	2.12057	2.20237	3.85741	2.18933	3.24257
944	training set	1-octyl-3-methylimidazolium iodide	M. H. Ghatee, M. Zare, F. Moosavi and A. R. Zolghadr, J. Chem. Eng. Data, 2010, 55, 3084-3088.	101.325	338.15	2.12057	2.06831	-2.46429	2.12202	0.06848
945	training set	1-hexyl-3-methylimidazolium tetrafluoroborate	Y. A. Sanmamed, D. Gonzalez-Salgado, J. Troncoso, C. A. Cerdeirina and L. Romani, Fluid Phase Equilibria, 2007, 252, 96-102.	101.325	303.15	2.1209	2.15967	1.828	2.07485	-2.17143
946	training set	Trimethyl(butyl)ammonium bis(trifluoromethylsulfonyl)imide	H. Tokuda, S. Tsuzuki, M. A. B. H. Susan, K. Hayamizu and M. Watanabe, J. Phys. Chem. B, 2006, 110, 19593-19600.	101.325	293.1	2.12222	1.97008	-7.16911	1.91053	-9.97511
947	training set	1-butyl-3-methylimidazolium hexafluorophosphate	K. R. Harris, L. A. Woolf and M. Kanakubo, J. Chem. Eng. Data, 2005, 50, 1777-1782.	140200	343.15	2.12254	2.29099	7.93643	2.30315	8.50914
948	test set	1-butyl-3-methylimidazolium hexafluorophosphate	D.Tomida, A.Kumagai, K.Qiao, C.Yokoyama, Int. J. Thermophys, 2006, 27, 39-47.	10000	313.15	2.12385	2.30363	8.46482	2.18989	3.10955
949	training	1-butyl-3-methylimidazolium hexafluoroantimony	Hideaki Shirota, Keiko Nishikawa, and Tateki Ishida，Atom Substitution Effects of [XF6]- in Ionic Liquids. 1. Experimental Study, J. Phys. Chem. B, 113 (2009) 9831-9839.	101.325	297	2.12597	2.40726	13.2313	1.96326	-7.65361
950	training	1-butyl-3-methylimidazolium tetrafluoroborate	O.O. Okoturo, T.J. VanderNoot, Temperature dependence of viscosity for room temperature ionic liquids, Journal of Electroanalytical Chemistry, 568 (2004) 167–181	101.325	288.15	2.1271	2.28737	7.53462	2.29532	7.90816
951	training set	1-butylpyridinium bis(trifluoromethylsulfonyl)imide	H. Tokuda, S. Tsuzuki, M. A. B. H. Susan, K. Hayamizu and M. Watanabe, J. Phys. Chem. B, 2006, 110, 19593-19600.	101.325	283.1	2.13418	2.19532	2.86469	2.13511	0.04352
952	training set	1-hexyl-3-methylimidazolium hexafluorophosphate	K. R. Harris, M. Kanakubo, L. A. Bis(trifluoromethylsulfonyl)imide. Woolf, J. Chem. Eng. Data, 2007, 52, 1080-1085.	120700	348.15	2.13481	2.2588	5.80801	2.22854	4.39041
953	training set	1-octyl-3-methylimidazolium tetrafluoroborate	K. R. Harris, M. Kanakubo and L. A. Woolf, J. Chem. Eng. Data, 2006, 51, 1161-1167.	175300	348.15	2.13609	2.16413	1.31263	2.1438	0.36087
954	training set	1-ethyl-3-methylimidazolium n-butylsulfate	A. J. L. Costa, J. M. S. S. Esperança, I. M. Marrucho and L. s. P. N. Rebelo, J. Chem. Eng. Data, 2011, 56, 3433-3441.	101.325	303.15	2.13956	2.02969	-5.13507	1.93341	-9.63539
955	training set	1-butyl-3-methyl pyridinium bis((trifluoromethyl)sulfonyl)amide	J. M. Crosthwaite, M. J. Muldoon, J. N. K. Dixon, J. L. Anderson and J. F. Brennecke, J. Chem. Thermodyn, 2005, 37, 559-568.	101.325	283	2.13988	2.14949	0.44917	2.14426	0.20486
956	training	1-(2-methoxyethyl)-3-methylimidazolium tetrafluoroborate	Luis C. Branco,Joao N. Rosa, Joaquim J. Moura Ramos, and Carlos A. M. Afonso, Preparation and Characterization of New Room Temperature Ionic Liquids, Chem. Eur. J., 2002, 8, No. 16	101.325	303.15	2.13988	1.91479	-10.5189	1.92805	-9.89902
957	training set	1-methyl-3-octylimidazolium hexafluorophosphate	K. R. Harris, M. Kanakubo and L. A. Woolf, J. Chem. Eng. Data, 2006, 51, 1161-1167.	101.325	343.15	2.14208	1.98331	-7.41181	2.04909	-4.34103
958	training set	1-butyl-3-methylimidazolium tetrafluoroborate	D.Tomida, A.Kumagai, K.Qiao, C.Yokoyama, Int. J. Thermophys, 2006, 27, 39-47.	5000	293.15	2.14301	2.22109	3.64333	2.1973	2.53317
959	training set	1-butyl-3-methylimidazolium hexafluorophosphate	K. R. Harris, L. A. Woolf and M. Kanakubo, J. Chem. Eng. Data, 2005, 50, 1777-1782.	100100	333.15	2.14426	2.30781	7.62743	2.316	8.00914
960	training set	1-hexyl-3-methylimidazolium iodide	M. H. Ghatee, M. Zare, F. Moosavi and A. R. Zolghadr, J. Chem. Eng. Data, 2010, 55, 3084-3088.	101.325	333.15	2.14489	2.05311	-4.27886	2.07398	-3.30618
961	training	1-butyl-3-methylimidazolium acetate	Glen McHale, Chris Hardacre, Rile Ge, Nicola Doy, Ray W. K.Allen, Jordan M. MacInnes, Mark R.Bown, and MichaelI. Newton, Density-Viscosity Product of Small-Volume Ionic Liquid Samples Using Quartz Crystal Impedance Analysis, Anal. Chem., 80 (2008) 5806-5811.	101.325	298.15	2.1452	2.83899	32.3419	2.40367	12.0488
962	training set	1-butyl-3-methylimidazolium hexafluorophosphate	D.Tomida, A.Kumagai, K.Qiao, C.Yokoyama, Int. J. Thermophys, 2006, 27, 39-47.	15000	313.15	2.14613	2.32273	8.22877	2.20737	2.85356
963	training set	1-butyl-3-methyl-imidazolium bis(trifluoromethylsulfonyl)imide	K. R. Harris, M. Kanakubo, L. A. Bis(trifluoromethylsulfonyl)imide. Woolf, J. Chem. Eng. Data, 2007, 52, 1080-1085.	100	278.15	2.14737	2.26202	5.33912	2.30894	7.52418
964	training set	1-butyl-3-methylimidazolium bis((trifluoromethyl)sulfonyl)amide	K. R. Harris, M. Kanakubo, L. A. Bis(trifluoromethylsulfonyl)imide. Woolf, J. Chem. Eng. Data, 2007, 52, 1080-1085.	100	278.15	2.14737	2.26202	5.33912	2.30894	7.52418
965	training	1-butyl-3-methylimidazolium hexafluorophosphate	Pereiro, A. B.; Legido, J. L.; Rodriguez, A.; Physical properties of ionic liquids based on 1-alkyl-3-methylimidazolium cation and hexafluorophosphate as anion and temperature dependence; J. Chem. Thermodyn. 39 1168-1175.	101.325	308.15	2.14789	2.35082	9.44761	2.30216	7.18226
966	test set	1-octyl-3-methylimidazolium hexafluorophosphate	K. R. Harris, M. Kanakubo and L. A. Woolf, J. Chem. Eng. Data, 2006, 51, 1161-1167.	101.325	333.15	2.14799	2.15331	0.24782	2.20212	2.52002
967	training set	1-hexyl-3-methylimidazolium tetrafluoroborate	A. Muhammad, M. I. Abdul Mutalib, C. D. Wilfred, T. Murugesan and A. Shafeeq, J. Chem. Thermodyn., 2008, 40, 1433–1438.	101.325	288.2	2.14922	2.41382	12.3115	2.41626	12.4251
968	training set	1-butyl-3-methylimidazolium tetrafluoroborate	K. R. Harris, M. Kanakubo and L. A. Woolf, J. Chem. Eng. Data, 2007, 52, 2425-2430.	100	293.15	2.15229	2.20237	2.32678	2.18933	1.721
969	training set	1-butyl-3-methylimidazolium tetrafluoroborate	K. R. Harris, M. Kanakubo and L. A. Woolf, J. Chem. Eng. Data, 2007, 52, 2425-2430.	100	293.15	2.15259	2.20237	2.31252	2.18933	1.70682
970	training set	1-butyl-3-methylimidazolium tetrafluoroborate	K. R. Harris, M. Kanakubo and L. A. Woolf, J. Chem. Eng. Data, 2007, 52, 2425-2430.	25900	298.15	2.15412	2.21592	2.86915	2.20473	2.34932
971	training set	1-octyl-3-methylimidazolium tetrafluoroborate	K. R. Seddon, A. S. Stark, M.J. Torres, M. Abraham, L. Moens, Eds., ACS Symposium Series 819, American Chemical Society: Washington DC, 2002, 34-49.	101.325	313.1	2.15534	2.09072	-2.99813	2.13037	-1.15841
972	training set	1-hexyl-3-methylimidazolium hexafluorophosphate	A. B. Pereiro and J. L. Legido, J. Chem. Thermodyn., 2007, 39, 1168–1175.	101.325	318.15	2.15709	2.30811	7.00124	2.34462	8.69361
973	training	1-hexyl-3-methylimidazolium hexafluorophosphate	Pereiro, A. B.; Legido, J. L.; Rodriguez, A.; Physical properties of ionic liquids based on 1-alkyl-3-methylimidazolium cation and hexafluorophosphate as anion and temperature dependence; J. Chem. Thermodyn. 39 1168-1175.	101.325	318.15	2.15709	2.30811	7.00104	2.34462	8.69341
974	training set	1-ethyl-3-methylimidazolium n-octylsulfate	B. Hasse, J. Lehmann, D. Assenbaum, P. Wasserscheid, A. Leipertz and A. P. Fröba, J. Chem. Eng. Data ,2009, 54, 2576-2583.	101.325	323.15	2.15776	1.45149	-32.7316	1.94595	-9.8163
975	training set	1-butyl-3-methylimidazolium nitrate	K. R. Seddon, A. S. Stark, M.J. Torres, M. Abraham, L. Moens, Eds., ACS Symposium Series 819, American Chemical Society: Washington DC, 2002, 34-49.	101.325	303.15	2.15836	2.41051	11.6827	2.06424	-4.36054
976	test set	1-octyl-3-methylimidazolium tetrafluoroborate	K. R. Harris, M. Kanakubo and L. A. Woolf, J. Chem. Eng. Data, 2006, 51, 1161-1167.	100	313.15	2.15866	2.08986	-3.18693	2.12898	-1.37477
977	training set	1-butyl-3-methylimidazolium hexafluorophosphate	K. R. Harris, L. A. Woolf and M. Kanakubo, J. Chem. Eng. Data, 2005, 50, 1777-1782.	149900	343.15	2.15957	2.32805	7.80146	2.33178	7.97427
978	training	1-butyl-3-methylimidazolium hexafluorophosphate	Zhu Jiqin, Chen Jian, Li Chengyue, and Fei Weiyang, Viscosities and Interfacial Properties of 1-Methyl-3-butylimidazolium Hexafluorophosphate and 1-Isobutenyl-3-methylimidazolium tetrafluoroborate Ionic Liquids, J. Chem. Eng. Data, 52 (2007) 812-816.	101.325	305.15	2.16167	2.40182	11.1095	2.36616	9.45995
979	training set	1-octyl-3-methylpyridinium bis(trifluoromethylsulfonyl)imide	J. M. Crosthwaite, M. J. Muldoon, J. N. K. Dixon, J. L. Anderson and J. F. Brennecke, J. Chem. Thermodyn, 2005, 37, 559-568.	101.325	293	2.16435	2.21535	2.35645	2.2549	4.18386
980	training set	1-ethyl-3-methyl imidazolium hydrogen sulfate	A. J. L. Costa, J. M. S. S. Esperança, I. M. Marrucho and L. s. P. N. Rebelo, J. Chem. Eng. Data, 2011, 56, 3433-3441.	101.325	343.15	2.16643	2.32529	7.33294	2.17776	0.52305
981	training set	1-butyl-3-methylimidazolium bis(trifluoromethylsulfonyl)imide	K. R. Harris, M. Kanakubo, L. A. Bis(trifluoromethylsulfonyl)imide. Woolf, J. Chem. Eng. Data, 2007, 52, 1080-1085.	24300	283.15	2.16673	2.26946	4.74146	2.1563	-0.48116
982	training set	1-butyl-3-methylimidazolium tetrafluoroborate	D.Tomida, A.Kumagai, K.Qiao, C.Yokoyama, Int. J. Thermophys, 2006, 27, 39-47.	10000	293.15	2.16732	2.24019	3.36208	2.20809	1.88124
983	training set	1-octyl-3-methylimidazolium tetrafluoroborate	K. R. Harris, M. Kanakubo and L. A. Woolf, J. Chem. Eng. Data, 2006, 51, 1161-1167.	100500	333.15	2.16938	2.13339	-1.65886	2.14513	-1.11795
984	training set	1-octyl-3-methylimidazolium tetrafluoroborate	B. Mokhtarani, M. M. Mojtahedi, H. R. Mortaheb, M. Mafi, F. Yazdani and F. Sadeghian, J. Chem. Eng. Data, 2008, 53, 677-682.	101.325	313.15	2.17003	2.08987	-3.69396	2.12898	-1.89148
985	training	1-butyl-3-methylimidazolium hexafluorophosphate	Baghdadi M, Shemirani F. Cold-induced aggregation microextraction: A novel sample preparation technique based on ionic liquids. Analytica Chimica Acta. 2008. 613, 56-63.	101.325	298.15	2.17026	2.52082	16.1527	2.44991	12.8853
986	test set	1-hexyl-3-methylimidazolium bis(trifluoromethylsulfonyl)amide	J. M. Crosthwaite, M. J. Muldoon, J. N. K. Dixon, J. L. Anderson and J. F. Brennecke, J. Chem. Thermodyn, 2005, 37, 559-568.	101.325	283	2.17026	2.30687	6.29472	2.24711	3.54125
987	training	1-butyl-3-methylimidazolium hexafluorophosphate	O.O. Okoturo, T.J. VanderNoot, Temperature dependence of viscosity for room temperature ionic liquids, Journal of Electroanalytical Chemistry, 568 (2004) 167–181	101.325	303.15	2.17319	2.43582	12.0851	2.39902	10.3918
988	training set	1-butyl-3-methylimidazolium tetrafluoroborate	K. R. Harris, M. Kanakubo and L. A. Woolf, J. Chem. Eng. Data, 2007, 52, 2425-2430.	175463	323.15	2.17377	2.36226	8.67091	2.37378	9.20088
989	training set	1-ethyl-3-methylpyridinium ethylsulfate	J. M. Crosthwaite, M. J. Muldoon, J. N. K. Dixon, J. L. Anderson and J. F. Brennecke, J. Chem. Thermodyn, 2005, 37, 559-568.	101.325	298	2.17609	2.21643	1.85356	2.09801	-3.58825
990	training set	1-octyl-3-methylimidazolium tetrafluoroborate	K. R. Harris, M. Kanakubo and L. A. Woolf, J. Chem. Eng. Data, 2006, 51, 1161-1167.	50800	323.15	2.17638	2.11354	-2.88741	2.0914	-3.90452
991	test set	1-octyl-3-methylimidazolium hexafluorophosphate	A. B. Pereiro and J. L. Legido, J. Chem. Thermodyn., 2007, 39, 1168–1175.	101.325	323.15	2.17774	2.32331	6.68459	2.39241	9.85743
992	test set	1-butyl-3-methyl imidazolium bis(pentafluoroethylsulfonyl)imide	H. Tokuda, S. Tsuzuki, M. A. B. H. Susan, K. Hayamizu and M. Watanabe, J. Phys. Chem. B, 2006, 110, 19593-19600.	101.325	293.1	2.17782	1.92284	-11.7081	2.05278	-5.74162
993	training	1-butyl-3-methylimidazolium hexafluoroantimony	O.O. Okoturo, T.J. VanderNoot, Temperature dependence of viscosity for room temperature ionic liquids, Journal of Electroanalytical Chemistry, 568 (2004) 167–181	101.325	288.15	2.17898	2.55771	17.3814	2.18162	0.12145
994	test set	1-butyl-3-methylimidazolium hexafluorophosphate	D.Tomida, A.Kumagai, K.Qiao, C.Yokoyama, Int. J. Thermophys, 2006, 27, 39-47.	20000	313.15	2.17898	2.34183	7.47368	2.22831	2.26396
995	training set	1-butyl-3-methyl-imidazolium bis(trifluoromethylsulfonyl)imide	K. R. Harris, M. Kanakubo, L. A. Bis(trifluoromethylsulfonyl)imide. Woolf, J. Chem. Eng. Data, 2007, 52, 1080-1085.	226000	323.15	2.17955	2.35996	8.27734	2.11382	-3.01573
996	training set	1-octyl-3-methylimidazolium hexafluorophosphate	K. R. Seddon, A. S. Stark, M.J. Torres, M. Abraham, L. Moens, Eds., ACS Symposium Series 819, American Chemical Society: Washington DC, 2002, 34-49.	101.325	323.15	2.18184	2.32331	6.48412	2.39241	9.65099
997	training set	1-butyl-3-methylimidazolium octylsulfate	P. Wasserscheid, R. van Hal and A. Bosmann, Green Chem., 2002, 4, 400-404.	101.325	323.1	2.1827	1.60007	-26.693	2.19848	0.7229
998	training set	Trimethylhexylammonium bis(trifluoromethylsulfonyl)imide	J. Sun, M. Forsyth and D. R. MacFarlane, J. Phys. Chem. B, 1998, 102, 8858-8864.	101.325	298.1	2.18469	2.02576	-7.27455	1.97223	-9.72488
999	training	1-hexyl-3-methylimidazolium bis(trifluoromethylsulfonyl)imide	Jason A. Widegren and Joseph W. Magee, Density, Viscosity, Speed of Sound, and Electrolytic Conductivity for the Ionic Liquid 1-hexyl-3-methylimidazolium Bis(trifluoromethylsulfonyl)imide and Its Mixtures with Water, J. Chem. Eng. Data, 52 (2007) 2331-2338.	101.325	283.15	2.18554	2.30432	5.43479	2.2442	2.68385
1000	training	1-butyl-3-methylimidazolium tetrafluoroborate	Weiwei Liu, Tianyu Zhao, Yumei Zhang, HuapingWang, Mingfang Yu, The Physical Properties of Aqueous Solutions of the Ionic Liquid [BMIM][BF4], J Solution Chem, 35 (2006)1337-1346.	101.325	298.15	2.1869	2.11737	-3.17924	2.13045	-2.58116
1001	test	1-butyl-3-methylimidazolium tetrafluoroborate	Liu, W.; Zhao, T.; Zhang, Y.; Wang, H.; Yu, M.; The Physical Properties of Aqueous Solutions of the Ionic Liquid [BMIM][BF4] ; J. Solution Chem., 35 1337-1346.	101.325	298.15	2.1869	2.11737	-3.17924	2.13045	-2.58116
1002	test	1-butyl-3-methylimidazolium hexafluorophosphate	Qi M Y, Wu G Z, Li Q M, et al. Gamma-radiation effect on ionic liquid [bmim] [BF4]. Radiat. Phys. Chem. 2008. 77, 877-883.	101.325	308.15	2.18724	2.35082	7.47877	2.30216	5.25417
1003	training set	1-butyl-3-methylimidazolium tetrafluoroborate	K. R. Seddon, A. S. Stark, M.J. Torres, M. Abraham, L. Moens, Eds., ACS Symposium Series 819, American Chemical Society: Washington DC, 2002, 34-49.	101.325	293.15	2.18752	2.20237	0.67904	2.18933	0.08287
1004	training	1-butyl-3-methylimidazolium tetrafluoroborate	Seddon, K.; Stark, A.; Torres, M.-J.; Influence of chloride, water, and organic solvents on the physical properties of ionic liquids; Pure Appl. Chem. 72 (12) 2275-2287.	101.325	293.1	2.18752	2.20322	0.71786	2.19011	0.11827
1005	test	1-butyl-3-methylimidazolium tetrafluoroborate	Kenneth R. Seddon, Annegret Stark, and Maria-Jose Torres, Influence of chloride, water, and organic solvents on the physical properties of ionic liquids, Pure Appl. Chem., 2000 Vol.72 No.12 2275-2287.	101.325	293.15	2.18752	2.20237	0.679	2.18933	0.08283
1006	test set	1-hexyl-3-methylimidazolium bis(trifluoromethylsulfonyl)imide	H. Tokuda, K. Hayamizu, K. Ishii, M. A. B. H. Susan and M. Watanabe, J. Phys. Chem. B, 2005, 109, 6103-6110.	101.325	283.15	2.18879	2.30432	5.27834	2.2442	2.53149
1007	training set	1-butyl-3-methylimidazolium trifluoroacetate	J. M. Crosthwaite, M. J. Muldoon, J. N. K. Dixon, J. L. Anderson and J. F. Brennecke, J. Chem. Thermodyn, 2005, 37, 559-568.	101.325	283	2.19033	2.21896	1.30707	2.13843	-2.36939
1008	training set	1-butyl-3-methylimidazolium tetrafluoroborate	D.Tomida, A.Kumagai, K.Qiao, C.Yokoyama, Int. J. Thermophys, 2006, 27, 39-47.	15000	293.15	2.19033	2.25929	3.14825	2.22174	1.43381
1009	training set	1-butyl-3-methylimidazolium hexafluorophosphate	K. R. Harris, L. A. Woolf and M. Kanakubo, J. Chem. Eng. Data, 2005, 50, 1777-1782.	100	308.15	2.19976	2.35081	6.86675	2.30216	4.65492
1010	training set	1-butyl-3-methylimidazolium hexafluorophosphate	W. Fan, Q. Zhou, J. Sun and S. J. Zhang, J. Chem. Eng. Data, 2009, 54, 2307-2311.	101.325	308.15	2.2018	2.35082	6.76797	2.30216	4.55808
1011	training set	1-methyl-3-octylimidazolium hexafluorophosphate	K. R. Harris, M. Kanakubo and L. A. Woolf, J. Chem. Eng. Data, 2006, 51, 1161-1167.	101.325	323.15	2.20194	2.32331	5.5121	2.39241	8.65006
1012	test set	1-butyl-3-methylimidazolium hexafluorophosphate	K. R. Harris, L. A. Woolf and M. Kanakubo, J. Chem. Eng. Data, 2005, 50, 1777-1782.	900	308.15	2.2033	2.35387	6.83375	2.30391	4.56627
1013	test	1-butyl-3-methylimidazolium hexafluorophosphate	K. S. Mali, G. B. Dutt, and T. Mukherjee, Photoisomerization of cyanine derivatives in 1-butyl-3-methylimidazolium hexafluorophosphate and aqueous glycerol: Influence of specific interactions, J. Chem. Phys., 128 (2008) 124515.	101.325	303	2.20575	2.43837	10.5462	2.40116	8.85952
1014	training set	1-butyl-3-methylimidazolium methylsulfate	A. B.Pereiro, P. Verdía, E. Tojo, A. Rodríguez, J. Chem. Eng. Data, 2007, 52, (2), 377-380.	101.325	303.15	2.20664	2.28221	3.42453	2.05824	-6.72507
1015	training set	1-hexyl-3-methylimidazolium bis(trifluoromethylsulfonyl)imide	H. Tokuda, S. Tsuzuki, M. A. B. H. Susan, K. Hayamizu and M. Watanabe, J. Phys. Chem. B, 2006, 110, 19593-19600.	101.325	283.1	2.20763	2.30517	4.41839	2.24517	1.70038
1016	training set	1-butyl-3-methylimidazolium bis(trifluoromethylsulfonyl)imide	K. R. Harris, M. Kanakubo, L. A. Bis(trifluoromethylsulfonyl)imide. Woolf, J. Chem. Eng. Data, 2007, 52, 1080-1085.	101500	298.15	2.20817	2.30937	4.58292	2.25665	2.19562
1017	test set	1-hexyl-3-methylimidazolium hexafluorophosphate	K. R. Harris, M. Kanakubo, L. A. Bis(trifluoromethylsulfonyl)imide. Woolf, J. Chem. Eng. Data, 2007, 52, 1080-1085.	25800	323.15	2.20871	2.32128	5.09673	2.29943	4.10726
1018	training	1-butyl-3-methylimidazolium hexafluorophosphate	Zhu Jiqin, Chen Jian, Li Chengyue, and Fei Weiyang, Viscosities and Interfacial Properties of 1-Methyl-3-butylimidazolium Hexafluorophosphate and 1-Isobutenyl-3-methylimidazolium tetrafluoroborate Ionic Liquids, J. Chem. Eng. Data, 52 (2007) 812-816.	101.325	303.15	2.21192	2.43582	10.1222	2.39902	8.45868
1019	training set	1-butyl-3-methylimidazolium tetrafluoroborate	D.Tomida, A.Kumagai, K.Qiao, C.Yokoyama, Int. J. Thermophys, 2006, 27, 39-47.	20000	293.15	2.21219	2.27839	2.99237	2.23833	1.18152
1020	training set	1-butyl-3-methylimidazolium trifluoromethylsulfonate	K. R. Seddon, A. S. Stark, M.J. Torres, M. Abraham, L. Moens, Eds., ACS Symposium Series 819, American Chemical Society: Washington DC, 2002, 34-49.	101.325	283.15	2.21219	2.09504	-5.29579	2.32818	5.24306
1021	training	1-butyl-3-methylimidazolium tetrafluoroborate	O.O. Okoturo, T.J. VanderNoot, Temperature dependence of viscosity for room temperature ionic liquids, Journal of Electroanalytical Chemistry, 568 (2004) 167–181	101.325	283.15	2.21219	2.37237	7.24109	2.46631	11.4875
1022	test set	1-butylpyridinium tetrafluoroborate	B. Mokhtarani, A. Sharifi, H. R. Mortaheb, M. Mirzaei, M. Mafi and F. Sadeghian, J. Chem. Thermodyn, 2009, 41, 323-329.	101.325	298.15	2.21288	2.13482	-3.52771	2.11052	-4.62559
1023	training set	1-octyl-3-methylimidazolium tetrafluoroborate	K. R. Harris, M. Kanakubo and L. A. Woolf, J. Chem. Eng. Data, 2006, 51, 1161-1167.	200200	348.15	2.21378	2.25925	2.05382	2.18918	-1.11133
1024	training set	1-butyl-3-methyl imidazolium acetate	J. M. Crosthwaite, M. J. Muldoon, J. N. K. Dixon, J. L. Anderson and J. F. Brennecke, J. Chem. Thermodyn, 2005, 37, 559-568.	101.325	313	2.21748	2.58654	16.6434	2.17926	-1.72377
1025	training set	1-butyl-3-methylimidazolium nitrate	B. Mokhtarani, A. Sharifi, H. R. Mortaheb, M. Mirzaei, M. Mafi and F. Sadeghian, J. Chem. Thermodyn, 2009, 41, 1432-1438.	101.325	298.15	2.21819	2.49551	12.5023	2.22674	0.38544
1026	test set	1-butyl-3-methylimidazolium iodide	M. H. Ghatee, M. Zare, F. Moosavi and A. R. Zolghadr, J. Chem. Eng. Data, 2010, 55, 3084-3088.	101.325	318.15	2.21932	2.18082	-1.7349	2.01699	-9.11668
1027	training set	1-ethyl-3-methylimidazolium ethylsulfate	H. Rodriguez, J. F. Brennecke, J. Chem. Eng. Data, 2006, 51, 2145-2155.	101.325	288.15	2.22011	2.40012	8.10829	2.29894	3.55069
1028	training set	1-octyl-3-methylimidazolium iodide	M. H. Ghatee, M. Zare, F. Moosavi and A. R. Zolghadr, J. Chem. Eng. Data, 2010, 55, 3084-3088.	101.325	333.15	2.22063	2.15331	-3.03143	2.20212	-0.83355
1029	test set	Triethylhexylammonium bis(trifluoromethylsulfonyl)imide	J. Sun, M. Forsyth and D. R. MacFarlane, J. Phys. Chem. B, 1998, 102, 8858-8864.	101.325	298.1	2.22272	2.02044	-9.10075	1.96223	-11.7193
1030	training	1-butyl-3-methylimidazolium methylsulfate	Ramesh L. Gardas, Joao A.P. Coutinho, A group contribution method for viscosity estimation of ionic liquids, Fluid Phase Equilibria, 266 (2008) 195-201.	101.325	298.15	2.22324	2.36721	6.47573	2.20672	-0.74289
1031	training set	1-decyl-3-methylimidazolium bis(trifluoromethylsulfonyl)imide	A. Ahosseini and A. M. Scurto, Int. J. Thermophys, 2008, 29, 1222-1243.	34600	298.15	2.22401	2.37297	6.69802	2.10315	-5.43439
1032	test set	1-butyl-1-methyl pyrrolidinium bis(trifluoromethylsulfonyl)imide	H. Tokuda, S. Tsuzuki, M. A. B. H. Susan, K. Hayamizu and M. Watanabe, J. Phys. Chem. B, 2006, 110, 19593-19600.	101.325	283.1	2.22479	2.15565	-3.10763	2.14026	-3.79959
1033	training set	1-butyl-3-methyl imidazolium octylsulfate	J. Jacquemin, P. Husson, V. Majer, A. A. H. Padua and M. F. C. Gomes, Green Chem., 2008, 10, 944-950.	101.325	323.77	2.22531	1.58868	-28.6085	2.19707	-1.26907
1034	training set	1-octyl-3-methylimidazolium tetrafluoroborate	Y. A. Sanmamed, D. Gonzalez-Salgado, J. Troncoso, C. A. Cerdeirina and L. Romani, Fluid Phase Equilibria, 2007, 252, 96-102.	101.325	303.15	2.22763	2.25987	1.44728	2.42039	8.65311
1035	training set	1-hexyl-2,3-dimethylimidazolium bis(trifluoromethylsulfonyl)imide	J. M. Crosthwaite, M. J. Muldoon, J. N. K. Dixon, J. L. Anderson and J. F. Brennecke, J. Chem. Thermodyn, 2005, 37, 559-568.	101.325	293	2.233	2.15769	-3.37252	2.1434	-4.01236
1036	test set	1-octyl-3-methyl imidazolium chloride	K. R. Seddon, A. S. Stark, M.J. Torres, M. Abraham, L. Moens, Eds., ACS Symposium Series 819, American Chemical Society: Washington DC, 2002, 34-49.	101.325	363.15	2.23553	2.5328	13.2976	2.10596	-5.79592
1037	training set	1-ethyl-3-methyl imidazolium chloride	K. R. Seddon, A. S. Stark, M.J. Torres, M. Abraham, L. Moens, Eds., ACS Symposium Series 819, American Chemical Society: Washington DC, 2002, 34-49.	101.325	333.15	2.23805	2.66757	19.1918	2.4497	9.4569
1038	training	1-butyl-3-methylimidazolium hexafluorophosphate	O.O. Okoturo, T.J. VanderNoot, Temperature dependence of viscosity for room temperature ionic liquids, Journal of Electroanalytical Chemistry, 568 (2004) 167–181	101.325	298.15	2.23805	2.52082	12.6347	2.44991	9.46632
1039	training set	1-butyl-3-methylimidazolium hexafluorophosphate	K. R. Harris, L. A. Woolf and M. Kanakubo, J. Chem. Eng. Data, 2005, 50, 1777-1782.	75800	323.15	2.2393	2.38499	6.50587	2.37958	6.26435
1040	training set	1-butyl-3-methylimidazolium methylsulfate	A. Ferna´ndez, J. Garcı´a, J. S. Torrecilla,*M. Oliet, F. Rodrı´guez, J. Chem. Eng. Data, 2008, 53, 1518–1522	101.325	303.15	2.2393	2.28221	1.91609	2.05824	-8.08548
1041	training set	1-hexyl-3-methylimidazolium tetrafluoroborate	Y. A. Sanmamed, D. Gonzalez-Salgado, J. Troncoso, C. A. Cerdeirina and L. Romani, Fluid Phase Equilibria, 2007, 252, 96-102.	101.325	298.15	2.2408	2.24467	0.17271	2.17674	-2.8588
1042	training set	1-butyl-3-methylimidazolium hexafluorophosphate	K. R. Harris, L. A. Woolf and M. Kanakubo, J. Chem. Eng. Data, 2005, 50, 1777-1782.	172900	343.15	2.24576	2.41591	7.57641	2.40215	6.96375
1043	training set	1-methyl-3-octylimidazolium hexafluorophosphate	K. R. Harris, M. Kanakubo and L. A. Woolf, J. Chem. Eng. Data, 2006, 51, 1161-1167.	101.325	333.15	2.24601	2.15331	-4.12718	2.20212	-1.95414
1044	training set	N-butyl-3-methylpyridinium tetrafluoroborate	J. M. Crosthwaite, M. J. Muldoon, J. N. K. Dixon, J. L. Anderson and J. F. Brennecke, J. Chem. Thermodyn, 2005, 37, 559-568.	101.325	308.15	2.24797	1.91729	-14.7102	2.03361	-9.53586
1045	training	1-butyl-3-methylimidazolium hexafluoroantimony	O.O. Okoturo, T.J. VanderNoot, Temperature dependence of viscosity for room temperature ionic liquids, Journal of Electroanalytical Chemistry, 568 (2004) 167–181	101.325	283.15	2.24797	2.64271	17.5598	2.35295	4.66969
1046	test set	1-hexyl-3-methylimidazolium tetrafluoroborate	K. R. Seddon, A. S. Stark, M.J. Torres, M. Abraham, L. Moens, Eds., ACS Symposium Series 819, American Chemical Society: Washington DC, 2002, 34-49.	101.325	303.15	2.24797	2.15967	-3.92799	2.07485	-7.70134
1047	test set	1-butyl-3-methylimidazolium hexafluorophosphate	K. R. Harris, L. A. Woolf and M. Kanakubo, J. Chem. Eng. Data, 2005, 50, 1777-1782.	9600	308.15	2.2531	2.3871	5.94745	2.3265	3.25787
1048	test set	1-ethyl-3-methyl imidazolium hydrogen sulfate	A. J. L. Costa, J. M. S. S. Esperança, I. M. Marrucho and L. s. P. N. Rebelo, J. Chem. Eng. Data, 2011, 56, 3433-3441.	101.325	338.15	2.25431	2.41029	6.91933	2.24752	-0.30098
1049	training set	1-butyl-3-methylimidazolium tetrafluoroborate	K. R. Harris, M. Kanakubo and L. A. Woolf, J. Chem. Eng. Data, 2007, 52, 2425-2430.	200347	323.15	2.25551	2.45731	8.94709	2.41147	6.91478
1050	training set	1-ethyl-3-methylimidazolium n-butylsulfate	A. J. L. Costa, J. M. S. S. Esperança, I. M. Marrucho and L. s. P. N. Rebelo, J. Chem. Eng. Data, 2011, 56, 3433-3441.	101.325	298.15	2.2572	2.11469	-6.31348	2.05944	-8.76143
1051	training set	1-hexyl-3-methylimidazolium iodide	M. H. Ghatee, M. Zare, F. Moosavi and A. R. Zolghadr, J. Chem. Eng. Data, 2010, 55, 3084-3088.	101.325	328.15	2.25816	2.13811	-5.31614	2.15482	-4.57631
1052	training	N-methyl-butyl-piperidinium bis((trifluoromethyl)sulfonyl)imide	Zhou Z B, Matsumoto H, Tatsumi K. Cyclic quaternary ammonium ionic liquids with perfluoroalkyltrifluoroborates: Synthesis, characterization, and properties. Chem. Eur. J. 2006. 12, 2196-2212.	101.325	298.15	2.26007	1.90115	-15.8812	1.85184	-18.0629
1053	test set	1-butyl-3-methylimidazolium chloride	K. R. Seddon, A. S. Stark, M.J. Torres, M. Abraham, L. Moens, Eds., ACS Symposium Series 819, American Chemical Society: Washington DC, 2002, 34-49.	101.325	353.15	2.26007	2.47531	9.52338	2.06772	-8.51094
1054	test	1-butyl-3-methylimidazolium heptafluorobutanoate	Zhang, S., Ionic liquids : physicochemical properties. Elsevier: Amsterdam ; London, 2009.	101.325	293.15	2.26007	1.91477	-15.2785	2.11119	-6.58731
1055	test	1-butyl-3-methylimidazolium heptafluorobutanoate	Pierre Bonhote,Ana-Paula Dias, Nicholas Papageorgiou, Kuppuswamy Kalyanasundaram, and Michael Gra1tzel,Hydrophobic, Highly Conductive Ambient-Temperature Molten Salts, Inorg. Chem. 35 (1996) 1168-1178.	101.325	293.15	2.26007	1.91477	-15.2785	2.11119	-6.58731
1056	training set	1-butyl-3-methylimidazolium methylsulfate	E. Gómez, B. González, N. Calvar, E. Tojo and Á. Domínguez, J. Chem. Eng. Data, 2006, 51, 2096-2102.	101.325	298.15	2.26079	2.36721	4.70707	2.20672	-2.39164
1057	training	1-butyl-3-methylimidazolium hexafluorophosphate	Zhu Jiqin, Chen Jian, Li Chengyue, and Fei Weiyang, Viscosities and Interfacial Properties of 1-Methyl-3-butylimidazolium Hexafluorophosphate and 1-Isobutenyl-3-methylimidazolium tetrafluoroborate Ionic Liquids, J. Chem. Eng. Data, 52 (2007) 812-816.	101.325	301.15	2.26102	2.46982	9.23441	2.42412	7.21348
1058	test set	1-octyl-3-methylimidazolium tetrafluoroborate	K. R. Harris, M. Kanakubo and L. A. Woolf, J. Chem. Eng. Data, 2006, 51, 1161-1167.	125300	333.15	2.26126	2.22813	-1.46516	2.21899	-1.86922
1059	training set	1-octyl-3-methylimidazolium hexafluorophosphate	K. R. Harris, M. Kanakubo and L. A. Woolf, J. Chem. Eng. Data, 2006, 51, 1161-1167.	101.325	343.15	2.2615	1.98331	-12.301	2.04909	-9.39237
1060	test set	1-hexyl-3-methylimidazolium hexafluorophosphate	K. R. Harris, M. Kanakubo, L. A. Bis(trifluoromethylsulfonyl)imide. Woolf, J. Chem. Eng. Data, 2007, 52, 1080-1085.	80800	333.15	2.26198	2.36138	4.39447	2.32336	2.71358
1061	training set	1-hexyl-3-methylimidazolium chloride	K. R. Seddon, A. S. Stark, M.J. Torres, M. Abraham, L. Moens, Eds., ACS Symposium Series 819, American Chemical Society: Washington DC, 2002, 34-49.	101.325	353.15	2.26245	2.6026	15.0346	2.19957	-2.77949
1062	training set	1-butyl-3-methylimidazolium bis((trifluoromethyl)sulfonyl)amide	K. R. Harris, M. Kanakubo, L. A. Bis(trifluoromethylsulfonyl)imide. Woolf, J. Chem. Eng. Data, 2007, 52, 1080-1085.	249600	323.15	2.26293	2.45011	8.27161	2.14762	-5.09539
1063	training	1-butyl-3-methylimidazolium hexafluorophosphate	Pereiro, A. B.; Legido, J. L.; Rodriguez, A.; Physical properties of ionic liquids based on 1-alkyl-3-methylimidazolium cation and hexafluorophosphate as anion and temperature dependence; J. Chem. Thermodyn. 39 1168-1175.	101.325	303.15	2.26536	2.43582	7.52449	2.39902	5.90016
1064	training set	1-butyl-3-methylimidazolium tetrafluoroborate	K. R. Harris, M. Kanakubo and L. A. Woolf, J. Chem. Eng. Data, 2007, 52, 2425-2430.	50800	298.15	2.26717	2.31104	1.93514	2.35315	3.79227
1065	test set	1-hexyl-3-methylimidazolium hexafluorophosphate	A. B. Pereiro and J. L. Legido, J. Chem. Thermodyn., 2007, 39, 1168–1175.	101.325	313.15	2.27268	2.39311	5.29916	2.45618	8.074
1066	test	1-hexyl-3-methylimidazolium hexafluorophosphate	Pereiro, A. B.; Legido, J. L.; Rodriguez, A.; Physical properties of ionic liquids based on 1-alkyl-3-methylimidazolium cation and hexafluorophosphate as anion and temperature dependence; J. Chem. Thermodyn. 39 1168-1175.	101.325	313.15	2.27268	2.39311	5.29931	2.45618	8.07415
1067	training set	1-octyl-3-methylimidazolium tetrafluoroborate	K. R. Harris, M. Kanakubo and L. A. Woolf, J. Chem. Eng. Data, 2006, 51, 1161-1167.	100	308.15	2.27462	2.17486	-4.38557	2.27362	-0.04407
1068	training set	1-octyl-3-methylimidazolium tetrafluoroborate	K. R. Harris, M. Kanakubo and L. A. Woolf, J. Chem. Eng. Data, 2006, 51, 1161-1167.	100	308.15	2.27485	2.17486	-4.39523	2.27362	-0.05418
1069	training set	1-octyl-3-methylimidazolium tetrafluoroborate	K. R. Harris, M. Kanakubo and L. A. Woolf, J. Chem. Eng. Data, 2006, 51, 1161-1167.	100	308.15	2.27508	2.17486	-4.4049	2.27362	-0.06428
1070	training set	1-octyl-3-methylimidazolium tetrafluoroborate	K. R. Harris, M. Kanakubo and L. A. Woolf, J. Chem. Eng. Data, 2006, 51, 1161-1167.	100	308.15	2.27531	2.17486	-4.41456	2.27362	-0.07439
1071	training set	1-octyl-3-methylimidazolium tetrafluoroborate	K. R. Harris, M. Kanakubo and L. A. Woolf, J. Chem. Eng. Data, 2006, 51, 1161-1167.	100	308.15	2.27577	2.17486	-4.43388	2.27362	-0.09458
1072	training set	1-hexyl pyridinium bis((trifluoromethyl)sulfonyl)amide	J. M. Crosthwaite, M. J. Muldoon, J. N. K. Dixon, J. L. Anderson and J. F. Brennecke, J. Chem. Thermodyn, 2005, 37, 559-568.	101.325	283	2.27646	2.27424	-0.09736	2.19046	-3.77759
1073	training set	1-butyl-3-methylimidazolium nitrate	K. R. Seddon, A. S. Stark, M.J. Torres, M. Abraham, L. Moens, Eds., ACS Symposium Series 819, American Chemical Society: Washington DC, 2002, 34-49.	101.325	313.15	2.27875	2.36781	3.90829	2.14916	-5.6871
1074	training	1-butyl-3-methylimidazolium hexafluorophosphate	Sergei Arzhantsev, Hui Jin, Gary A. Baker, and Mark Maroncelli, Measurements of the Complete Solvation Response in Ionic Liquids, J. Phys. Chem. B, 111 ( 200) 4978-4989.	101.325	298.15	2.27875	2.52082	10.6226	2.44991	7.51082
1075	training set	1-octyl-3-methylimidazolium tetrafluoroborate	K. R. Harris, M. Kanakubo and L. A. Woolf, J. Chem. Eng. Data, 2006, 51, 1161-1167.	800	308.15	2.27898	2.17754	-4.45116	2.27438	-0.20173
1076	training set	1-hexyl-3-methylimidazolium tetrafluoroborate	E. Rilo, J. Vila, J. Pico, S. Garcia-Garabal, L. Segade, L. M. Varela and O. Cabeza, J. Chem. Eng. Data, 55, 639-644.	101.325	298.15	2.28085	2.24467	-1.58625	2.17674	-4.56453
1077	test set	1-octyl-3-methylimidazolium tetrafluoroborate	K. R. Harris, M. Kanakubo and L. A. Woolf, J. Chem. Eng. Data, 2006, 51, 1161-1167.	75700	323.15	2.28149	2.20866	-3.19234	2.24077	-1.7847
1078	training set	1-butyl-3-methylimidazolium bis(trifluoromethylsulfonyl)imide	K. R. Harris, M. Kanakubo, L. A. Bis(trifluoromethylsulfonyl)imide. Woolf, J. Chem. Eng. Data, 2007, 52, 1080-1085.	100	273.15	2.28171	2.34702	2.86236	2.49381	9.29558
1079	training set	1-butyl-3-methylimidazolium bis(trifluoromethylsulfonyl)imide	K. R. Harris, M. Kanakubo, L. A. Bis(trifluoromethylsulfonyl)imide. Woolf, J. Chem. Eng. Data, 2007, 52, 1080-1085.	100	273.15	2.2824	2.34702	2.83126	2.49381	9.26254
1080	test set	1-butyl-3-methylimidazolium trifluoroacetate	H. Tokuda, K. Hayamizu, K. Ishii, Md. A. B. H. Susan, M. Watanabe, J. Phys. Chem. B, 2004, 108, 16593-16600.	101.325	283.1	2.28262	2.21726	-2.86342	2.13774	-6.34689
1081	training set	1-octyl-3-methylimidazolium tetrafluoroborate	B. Mokhtarani, M. M. Mojtahedi, H. R. Mortaheb, M. Mafi, F. Yazdani and F. Sadeghian, J. Chem. Eng. Data, 2008, 53, 677-682.	101.325	308.15	2.28319	2.17487	-4.74424	2.27362	-0.4192
1082	test	1-propyl-3-methylimidazolium iodide	Philipp Wachter, Markus Zistler, Christian Schreiner, Matthias Fleischmann, Dirk Gerhard, Peter Wasserscheid,Joseph Barthel, and Heiner J. Gores, Temperature Dependence of the Non-Stokesian Charge Transport in Binary Blends of Ionic Liquids, J. Chem. Eng. Data, 54 (2009) 491-497.	101.325	323.15	2.28511	2.00175	-12.4002	2.09207	-8.44746
1083	training set	1-octyl-3-methylimidazolium tetrafluoroborate	K. R. Harris, M. Kanakubo and L. A. Woolf, J. Chem. Eng. Data, 2006, 51, 1161-1167.	224200	348.15	2.28713	2.35093	2.78939	2.21448	-3.17655
1084	training set	1-hexyl-3-methylimidazolium hexafluorophosphate	K. R. Harris, M. Kanakubo, L. A. Bis(trifluoromethylsulfonyl)imide. Woolf, J. Chem. Eng. Data, 2007, 52, 1080-1085.	160600	348.15	2.28959	2.41122	5.31222	2.30923	0.85794
1085	training set	1-octyl-3-methyl imidazolium tetrafluoroborate	K. R. Harris, M. Kanakubo and L. A. Woolf, J. Chem. Eng. Data, 2006, 51, 1161-1167.	2900	308.15	2.28981	2.18556	-4.55274	2.27683	-0.56685
1086	training	1-butyl-3-methylimidazolium hexafluorophosphate	Hui Jin, Bernie O’Hare, Jing Dong, Sergei Arzhantsev, Gary A. Baker, James F. Wishart,Alan J. Benesi, and Mark Maroncelli, Physical Properties of Ionic Liquids Consisting of the 1-butyl-3-Methylimidazolium Cation with Various Anions and the Bis(trifluoromethylsulfonyl)imide Anion with Various Cations, J. Phys. Chem. B, 112 (2008) 81-92.	101.325	298.15	2.29226	2.52082	9.97101	2.44991	6.87753
1087	training set	1-octyl-3-methylimidazolium hexafluorophosphate	A. B. Pereiro and J. L. Legido, J. Chem. Thermodyn., 2007, 39, 1168–1175.	101.325	318.15	2.29277	2.40831	5.03945	2.50423	9.22297
1088	training set	1-hexyl-3-methylimidazolium hexafluorophosphate	K. R. Harris, M. Kanakubo, L. A. Bis(trifluoromethylsulfonyl)imide. Woolf, J. Chem. Eng. Data, 2007, 52, 1080-1085.	100	313.15	2.29447	2.39311	4.29894	2.45617	7.04753
1089	training set	1-hexyl-3-methylimidazolium hexafluorophosphate	K. R. Harris, M. Kanakubo, L. A. Bis(trifluoromethylsulfonyl)imide. Woolf, J. Chem. Eng. Data, 2007, 52, 1080-1085.	100	313.15	2.29447	2.39311	4.29894	2.45617	7.04753
1090	training set	1-hexyl-3-methylimidazolium hexafluorophosphate	D.Tomida, A.Kumagai, S. Kenmochi, K. Qiao, C. Yokoyama, J. Chem. Eng. Data, 2007, 52, 577-579.	100	313.15	2.29447	2.39311	4.29894	2.45617	7.04753
1091	test set	1-hexyl-3-methylimidazolium hexafluorophosphate	K. R. Harris, M. Kanakubo, L. A. Bis(trifluoromethylsulfonyl)imide. Woolf, J. Chem. Eng. Data, 2007, 52, 1080-1085.	400	313.15	2.29513	2.39425	4.31888	2.45682	7.04506
1092	training set	1-decyl-3-methylimidazolium bis(trifluoromethylsulfonyl)amide	A. Ahosseini and A. M. Scurto, Int. J. Thermophys, 2008, 29, 1222-1243.	47960	298.15	2.29885	2.42401	5.44446	2.16698	-5.73628
1093	training	1-butyl-3-methylimidazolium hexafluorophosphate	Qi M Y, Wu G Z, Li Q M, et al. Gamma-radiation effect on ionic liquid [bmim] [BF4]. Radiat. Phys. Chem. 2008. 77, 877-883.	101.325	303.15	2.30038	2.43582	5.88768	2.39902	4.28809
1094	training set	1-octyl-3-methylimidazolium bis(trifluoromethylsulfonyl)imide	H. Tokuda, S. Tsuzuki, M. A. B. H. Susan, K. Hayamizu and M. Watanabe, J. Phys. Chem. B, 2006, 110, 19593-19600.	101.325	283.1	2.30146	2.40537	4.51504	2.4278	5.48977
1095	training	1-butyl-3-methylimidazolium hexafluorophosphate	O.O. Okoturo, T.J. VanderNoot, Temperature dependence of viscosity for room temperature ionic liquids, Journal of Electroanalytical Chemistry, 568 (2004) 167–181	101.325	293.15	2.3032	2.60582	13.1392	2.48184	7.75653
1096	training set	1-butyl-3-methylimidazolium hexafluorophosphate	K. R. Harris, L. A. Woolf and M. Kanakubo, J. Chem. Eng. Data, 2005, 50, 1777-1782.	100	303.15	2.30535	2.43581	5.6591	2.39902	4.06303
1097	training set	Triethyloctylammonium bis(trifluoromethylsulfonyl)imide	J. Sun, M. Forsyth and D. R. MacFarlane, J. Phys. Chem. B, 1998, 102, 8858-8864.	101.325	298.1	2.30535	2.11143	-8.41192	2.12833	-7.67855
1098	training	Methyl-(2-methoxyethyl)piperidinium trifluoromethyltrifluoroborate	Zhou Z B, Matsumoto H, Tatsumi K. Cyclic quaternary ammonium ionic liquids with perfluoroalkyltrifluoroborates: Synthesis, characterization, and properties. Chem. Eur. J. 2006. 12, 2196-2212.	101.325	298.15	2.3075	1.89014	-18.0871	2.22931	-3.38838
1099	training set	1-ethyl-3-methylpyridinium ethylsulfate	J. M. Crosthwaite, M. J. Muldoon, J. N. K. Dixon, J. L. Anderson and J. F. Brennecke, J. Chem. Thermodyn, 2005, 37, 559-568.	101.325	293	2.30963	2.30143	-0.35525	2.18214	-5.51989
1100	training	1-butyl-3-methylimidazolium hexafluorophosphate	M. Brett Meredith, C. Heather McMillen, Jonathan T. Goodman, Timothy P. Hanusa，Ambient temperature imidazolium-based ionic liquids with tetrachloronickelate(II) anions, Polyhedron 28 (2009) 2355-2358.	101.325	303.15	2.30963	2.43582	5.46351	2.39902	3.87032
1101	test set	1-octyl-3-methylimidazolium tetrafluoroborate	K. R. Harris, M. Kanakubo and L. A. Woolf, J. Chem. Eng. Data, 2006, 51, 1161-1167.	5600	308.15	2.31027	2.19587	-4.95159	2.28033	-1.29579
1102	training set	1-butyl-3-methylimidazolium bis(trifluoromethylsulfonyl)imide	K. R. Harris, M. Kanakubo, L. A. Bis(trifluoromethylsulfonyl)imide. Woolf, J. Chem. Eng. Data, 2007, 52, 1080-1085.	49900	283.15	2.31345	2.36726	2.32582	2.20562	-4.66097
1103	training	1-butyl-3-methylimidazolium hexafluorophosphate	Baker S N, Baker G A, Kane M A, et al. The cybotactic region surrounding fluorescent probes dissolved in 1-butyl-3-methylimidazolium hexafluorophosphate: Effects of temperature and added carbon dioxide. J. Phys. Chem. B. 2001. 105, 9663-9668.	101.325	298.15	2.31597	2.52082	8.84496	2.44991	5.78316
1104	training	1-hexyl-3-methylimidazolium bis(trifluoromethylsulfonyl)imide	Jason A. Widegren and Joseph W. Magee, Density, Viscosity, Speed of Sound, and Electrolytic Conductivity for the Ionic Liquid 1-hexyl-3-methylimidazolium Bis(trifluoromethylsulfonyl)imide and Its Mixtures with Water, J. Chem. Eng. Data, 52 (2007) 2331-2338.	101.325	278.15	2.31723	2.38932	3.11123	2.35382	1.57936
1105	training set	1-butyl-3-methylimidazolium trifluoromethylsulfonate	H. Tokuda, S. Tsuzuki, M. A. B. H. Susan, K. Hayamizu and M. Watanabe, J. Phys. Chem. B, 2006, 110, 19593-19600.	101.325	283.1	2.31785	2.09589	-9.57624	2.32887	0.47523
1106	training set	1-hexyl-3-methylimidazolium hexafluorophosphate	K. R. Seddon, A. S. Stark, M.J. Torres, M. Abraham, L. Moens, Eds., ACS Symposium Series 819, American Chemical Society: Washington DC, 2002, 34-49.	101.325	313.15	2.32015	2.39311	3.14476	2.45618	5.86282
1107	training set	1-butyl-3-methylimidazolium hexafluorophosphate	W. Fan, Q. Zhou, J. Sun and S. J. Zhang, J. Chem. Eng. Data, 2009, 54, 2307-2311.	101.325	303.15	2.32066	2.43582	4.96225	2.39902	3.37664
1108	training set	1-hexyl-3-methylimidazolium hexafluorophosphate	D.Tomida, A.Kumagai, S. Kenmochi, K. Qiao, C. Yokoyama, J. Chem. Eng. Data, 2007, 52, 577-579.	5000	313.15	2.32222	2.41183	3.85864	2.46691	6.23085
1109	training set	1-butyl-3-methyl-imidazolium bis(trifluoromethylsulfonyl)imide	K. R. Harris, M. Kanakubo, L. A. Bis(trifluoromethylsulfonyl)imide. Woolf, J. Chem. Eng. Data, 2007, 52, 1080-1085.	126400	298.15	2.32284	2.40449	3.51495	2.29141	-1.35302
1110	training	1-butyl-3-methylimidazolium hexafluorophosphate	Zafarani-Moattar, M. T.; Majdan-Cegincara, R.; Viscosity, Density, Speed of Sound, and Refractive Index of Binary Mixtures of Organic Solvent + Ionic Liquid, 1-butyl-3-methylimidazolium Hexafluorophosphate at 298.15 K; J. Chem. Eng. Data, 52 2359-2364.	101.325	298.15	2.32654	2.52082	8.35044	2.44991	5.30255
1111	training	1-butyl-3-methylimidazolium hexafluorophosphate	Mohammed Taghi Zafarani-Moattar and Roghayeh Majdan-Cegincara, Viscosity, Density, Speed of Sound, and Refractive Index of Binary Mixtures of Organic Solvent + Ionic Liquid, 1-butyl-3-methylimidazolium Hexafluorophosphate at 298.15 K, J. Chem. Eng. Data, 52 (2007) 2359-2364.	101.325	298.15	2.32654	2.52082	8.35044	2.44991	5.30255
1112	training set	1-butyl-3-methylimidazolium methylsulfate	A. B.Pereiro, P. Verdía, E. Tojo, A. Rodríguez, J. Chem. Eng. Data, 2007, 52, (2), 377-380.	101.325	298.15	2.32877	2.36721	1.65053	2.20672	-5.24097
1113	training	1-butyl-3-methylimidazolium hexafluorophosphate	K. S. Mali, G. B. Dutt, and T. Mukherjee, Photoisomerization of cyanine derivatives in 1-butyl-3-methylimidazolium hexafluorophosphate and aqueous glycerol: Influence of specific interactions, J. Chem. Phys., 128 (2008) 124515.	101.325	298	2.32879	2.52337	8.35542	2.45092	5.24468
1114	test set	1-dodecyl-3-methyl imidazolium hexafluorophosphate	K. R. Seddon, A. S. Stark, M.J. Torres, M. Abraham, L. Moens, Eds., ACS Symposium Series 819, American Chemical Society: Washington DC, 2002, 34-49.	101.325	333.15	2.33041	2.34152	0.47679	1.71537	-26.3921
1115	test set	1-octyl-3-methylimidazolium tetrafluoroborate	K. R. Harris, M. Kanakubo and L. A. Woolf, J. Chem. Eng. Data, 2006, 51, 1161-1167.	10900	308.15	2.33082	2.21612	-4.92097	2.28851	-1.81533
1116	test set	1-butyl-3-methylimidazolium tetrafluoroborate	K. R. Harris, M. Kanakubo and L. A. Woolf, J. Chem. Eng. Data, 2007, 52, 2425-2430.	225321	323.15	2.33626	2.55271	9.26495	2.39608	2.56033
1117	test set	1-hexyl-3-methylimidazolium hexafluorophosphate	K. R. Harris, M. Kanakubo, L. A. Bis(trifluoromethylsulfonyl)imide. Woolf, J. Chem. Eng. Data, 2007, 52, 1080-1085.	50600	323.15	2.33666	2.41602	3.39622	2.39687	2.57665
1118	training set	1-butyl-3-methylimidazolium iodide	M. H. Ghatee, M. Zare, F. Moosavi and A. R. Zolghadr, J. Chem. Eng. Data, 2010, 55, 3084-3088.	101.325	313.15	2.33706	2.26582	-3.0484	2.16535	-7.34709
1119	training set	1-octyl-3-methylimidazolium hexafluorophosphate	K. R. Harris, M. Kanakubo and L. A. Woolf, J. Chem. Eng. Data, 2006, 51, 1161-1167.	101.325	323.15	2.33746	2.32331	-0.60523	2.39241	2.35081
1120	test set	1-octyl-3-methylimidazolium bis(trifluoromethylsulfonyl)imide	H. Tokuda, K. Hayamizu, K. Ishii, M. A. B. H. Susan and M. Watanabe, J. Phys. Chem. B, 2005, 109, 6103-6110.	101.325	283.15	2.33818	2.40452	2.83732	2.42715	3.80503
1121	training	1-butyl-3-methylimidazolium hexafluorophosphate	Zhu Jiqin, Chen Jian, Li Chengyue, and Fei Weiyang, Viscosities and Interfacial Properties of 1-Methyl-3-butylimidazolium Hexafluorophosphate and 1-Isobutenyl-3-methylimidazolium tetrafluoroborate Ionic Liquids, J. Chem. Eng. Data, 52 (2007) 812-816.	101.325	298.15	2.33826	2.52082	7.80752	2.44991	4.7749
1122	training set	1-octyl-3-methylimidazolium iodide	M. H. Ghatee, M. Zare, F. Moosavi and A. R. Zolghadr, J. Chem. Eng. Data, 2010, 55, 3084-3088.	101.325	328.15	2.33925	2.23831	-4.31493	2.29183	-2.0272
1123	training	1-butyl-3-methylimidazolium tetrafluoroborate	Andrew P. Abbott and Katy J. McKenzie, Application of ionic liquids to the electrodeposition of metals, Phys. Chem. Chem. Phys., 8 (2006), 4265-4279.	101.325	298	2.34044	2.11992	-9.42215	2.13187	-8.91173
1124	training set	1-butyl-3-methylimidazolium hexafluorophosphate	K. R. Harris, L. A. Woolf and M. Kanakubo, J. Chem. Eng. Data, 2005, 50, 1777-1782.	25800	308.15	2.34439	2.44899	4.46154	2.38848	1.88056
1125	test	1-ethyl-3-methylimidazolium ethylsulfate	Andreas P. Froba, Heiko Kremer, and Alfred Leipertz, Density, Refractive Index, Interfacial Tension, and Viscosity of Ionic Liquids [EMIM][EtSO4], [EMIM][NTf2], [EMIM][N(CN)2], and [OMA][NTf2] in Dependence on Temperature at Atmospheric Pressure, J. Phys. Chem. B, 112 (2008) 12420-12430.	101.325	283.15	2.34713	2.51604	7.1961	2.23512	-4.77256
1126	training set	1-ethyl-3-methyl imidazolium hydrogen sulfate	A. J. L. Costa, J. M. S. S. Esperança, I. M. Marrucho and L. s. P. N. Rebelo, J. Chem. Eng. Data, 2011, 56, 3433-3441.	101.325	333.15	2.34753	2.49529	6.29441	2.32807	-0.82888
1127	training set	1-octyl-3-methylimidazolium tetrafluoroborate	Y. A. Sanmamed, D. Gonzalez-Salgado, J. Troncoso, C. A. Cerdeirina and L. Romani, Fluid Phase Equilibria, 2007, 252, 96-102.	101.325	298.15	2.34792	2.34487	-0.1299	2.55961	9.01606
1128	test set	1-butyl-3-methylimidazolium nitrate	B. Mokhtarani, A. Sharifi, H. R. Mortaheb, M. Mirzaei, M. Mafi and F. Sadeghian, J. Chem. Thermodyn, 2009, 41, 1432-1438.	101.325	293.15	2.34801	2.58051	9.90218	2.39819	2.13719
1129	training set	1-butylpyridinium tetrafluoroborate	B. Mokhtarani, A. Sharifi, H. R. Mortaheb, M. Mirzaei, M. Mafi and F. Sadeghian, J. Chem. Thermodyn, 2009, 41, 323-329.	101.325	293.15	2.34842	2.21982	-5.47619	2.17438	-7.41114
1130	training set	1-hexyl-3-methylimidazolium hexafluorophosphate	D.Tomida, A.Kumagai, S. Kenmochi, K. Qiao, C. Yokoyama, J. Chem. Eng. Data, 2007, 52, 577-579.	10000	313.15	2.35025	2.43093	3.43266	2.47831	5.44882
1131	training set	1-butyl-3-methylimidazolium hexafluorophosphate	K. R. Harris, L. A. Woolf and M. Kanakubo, J. Chem. Eng. Data, 2005, 50, 1777-1782.	100700	323.15	2.35025	2.4801	5.52511	2.54192	8.15548
1132	training set	1-octyl-3-methylimidazolium tetrafluoroborate	K. R. Harris, M. Kanakubo and L. A. Woolf, J. Chem. Eng. Data, 2006, 51, 1161-1167.	150200	333.15	2.35083	2.32325	-1.17333	2.29285	-2.46649
1133	training	1-butyl-3-methylimidazolium hexafluoroarsenic	Hideaki Shirota, Keiko Nishikawa, and Tateki Ishida，Atom Substitution Effects of [XF6]- in Ionic Liquids. 1. Experimental Study, J. Phys. Chem. B, 113 (2009) 9831-9839.	101.325	297	2.35786	2.54037	7.74043	2.45731	4.21806
1134	training set	1-methyl-3-octylimidazolium hexafluorophosphate	K. R. Harris, M. Kanakubo and L. A. Woolf, J. Chem. Eng. Data, 2006, 51, 1161-1167.	101.325	333.15	2.36248	2.15331	-8.8537	2.20212	-6.78779
1135	training	1-butyl-3-methylimidazolium hexafluorophosphate	O.O. Okoturo, T.J. VanderNoot, Temperature dependence of viscosity for room temperature ionic liquids, Journal of Electroanalytical Chemistry, 568 (2004) 167–181	101.325	288.15	2.36361	2.69082	13.8434	2.54608	7.72002
1136	training set	1-hexyl-3-methylimidazolium tetrafluoroborate	Y. A. Sanmamed, D. Gonzalez-Salgado, J. Troncoso, C. A. Cerdeirina and L. Romani, Fluid Phase Equilibria, 2007, 252, 96-102.	101.325	293.15	2.36698	2.32967	-1.57627	2.28566	-3.43557
1137	training	1-butyl-3-methylimidazolium tetrafluoroborate	Hélène Olivier-Bourbigou, Lionel Magna, Ionic liquids: perspectives for organic and catalytic reactions, Journal of Molecular Catalysis A: Chemical, 182 (2002) 419-437	101.325	303.15	2.36736	2.03237	-14.15	2.08128	-12.0841
1138	training	1-butyl-3-methylimidazolium tetrafluoroborate	P.A.Z. Suarez ,S .Einloft, J.E.L. Dullius, R.F. de Souza and J. Dupont, Synthesis and physical-chemical properties of ionic liquids based on l -butyl-3-methylimidazolium cation, J. Chim. Phys., 95 (1998) 1626-1639.	101.325	303.15	2.36736	2.03237	-14.15	2.08128	-12.0841
1139	training set	1-octyl-3-methylimidazolium hexafluorophosphate	K. R. Harris, M. Kanakubo and L. A. Woolf, J. Chem. Eng. Data, 2006, 51, 1161-1167.	101.325	343.15	2.36866	1.98331	-16.2686	2.04909	-13.4915
1140	test set	1-hexyl-3-methylimidazolium iodide	M. H. Ghatee, M. Zare, F. Moosavi and A. R. Zolghadr, J. Chem. Eng. Data, 2010, 55, 3084-3088.	101.325	323.15	2.3694	2.22311	-6.17401	2.24335	-5.32001
1141	training set	1-hexyl-3-methylimidazolium hexafluoroborate	D.Tomida, A.Kumagai, S. Kenmochi, K. Qiao, C. Yokoyama, J. Chem. Eng. Data, 2007, 52, 577-579.	15000	313.15	2.3784	2.45003	3.01152	2.49043	4.71027
1142	training set	1-butyl-3-methylimidazolium tetrafluoroborate	K. R. Harris, M. Kanakubo and L. A. Woolf, J. Chem. Eng. Data, 2007, 52, 2425-2430.	75900	298.15	2.37985	2.40692	1.13768	2.53825	6.65595
1143	training set	1-octyl-3-methylimidazolium tetrafluoroborate	K. R. Seddon, A. S. Stark, M.J. Torres, M. Abraham, L. Moens, Eds., ACS Symposium Series 819, American Chemical Society: Washington DC, 2002, 34-49.	101.325	303.1	2.38021	2.26072	-5.02014	2.42183	1.74851
1144	training set	1-butyl-3-methylimidazolium octylsulfate	M.J. Davila, S. Aparicio, R. Alcalde, B. Garcia, J.M. Leal, Green Chem., 2007, 9, 221–232.	101.325	313.15	2.38112	1.76922	-25.6979	2.24807	-5.58782
1145	training set	1-octyl-3-methylimidazolium tetrafluoroborate	K. R. Harris, M. Kanakubo and L. A. Woolf, J. Chem. Eng. Data, 2006, 51, 1161-1167.	100600	323.15	2.38346	2.30377	-3.34325	2.36702	-0.68996
1146	training set	1-ethyl-3-methylimidazolium n-butylsulfate	A. J. L. Costa, J. M. S. S. Esperança, I. M. Marrucho and L. s. P. N. Rebelo, J. Chem. Eng. Data, 2011, 56, 3433-3441.	101.325	293.15	2.38435	2.19969	-7.74458	2.18784	-8.24157
1147	training	1-butyl-3-methylimidazolium hexafluorophosphate	Zhu Jiqin, Chen Jian, Li Chengyue, and Fei Weiyang, Viscosities and Interfacial Properties of 1-Methyl-3-butylimidazolium Hexafluorophosphate and 1-Isobutenyl-3-methylimidazolium tetrafluoroborate Ionic Liquids, J. Chem. Eng. Data, 52 (2007) 812-816.	101.325	296.15	2.39058	2.55482	6.87009	2.46241	3.00447
1148	test set	N-butyl-3-methylpyridinium tetrafluoroborate	J. M. Crosthwaite, M. J. Muldoon, J. N. K. Dixon, J. L. Anderson and J. F. Brennecke, J. Chem. Thermodyn, 2005, 37, 559-568.	101.325	305.65	2.39094	1.95979	-18.0327	2.07956	-13.0234
1149	test set	1-octyl-3-methylimidazolium tetrafluoroborate	B. Mokhtarani, M. M. Mojtahedi, H. R. Mortaheb, M. Mafi, F. Yazdani and F. Sadeghian, J. Chem. Eng. Data, 2008, 53, 677-682.	101.325	303.15	2.39125	2.25987	-5.4942	2.42039	1.21858
1150	training	1-butyl-3-methylimidazolium hexafluorophosphate	Pereiro, A. B.; Legido, J. L.; Rodriguez, A.; Physical properties of ionic liquids based on 1-alkyl-3-methylimidazolium cation and hexafluorophosphate as anion and temperature dependence; J. Chem. Thermodyn. 39 1168-1175.	101.325	298.15	2.3928	2.52082	5.34999	2.44991	2.3865
1151	training set	1-octyl-3-methylimidazolium tetrafluoroborate	K. R. Harris, M. Kanakubo and L. A. Woolf, J. Chem. Eng. Data, 2006, 51, 1161-1167.	100	303.15	2.39967	2.25986	-5.82601	2.42039	0.86335
1152	training set	1-octyl-3-methylimidazolium tetrafluoroborate	K. R. Harris, M. Kanakubo and L. A. Woolf, J. Chem. Eng. Data, 2006, 51, 1161-1167.	100	303.15	2.39967	2.25986	-5.82601	2.42039	0.86335
1153	training set	1-methyl-3-octylimidazolium hexafluorophosphate	K. R. Seddon, A. S. Stark, M.J. Torres, M. Abraham, L. Moens, Eds., ACS Symposium Series 819, American Chemical Society: Washington DC, 2002, 34-49.	101.325	313.15	2.4014	2.49331	3.82748	2.62505	9.31349
1154	training	1-hexyl-3-methylimidazolium hexafluorophosphate	Pereiro, A. B.; Legido, J. L.; Rodriguez, A.; Physical properties of ionic liquids based on 1-alkyl-3-methylimidazolium cation and hexafluorophosphate as anion and temperature dependence; J. Chem. Thermodyn. 39 1168-1175.	101.325	308.15	2.40259	2.47811	3.14349	2.56719	6.85122
1155	test set	1-hexyl-3-methylimidazolium hexafluorophosphate	A. B. Pereiro and J. L. Legido, J. Chem. Thermodyn., 2007, 39, 1168–1175.	101.325	308.15	2.40259	2.47811	3.1434	2.56719	6.85113
1156	training set	1-hexyl-3-methylimidazolium hexafluorophosphate	D.Tomida, A.Kumagai, S. Kenmochi, K. Qiao, C. Yokoyama, J. Chem. Eng. Data, 2007, 52, 577-579.	20000	313.15	2.40312	2.46913	2.74668	2.50357	4.17979
1157	training set	1-octyl-3-methylimidazolium tetrafluoroborate	K. R. Harris, M. Kanakubo and L. A. Woolf, J. Chem. Eng. Data, 2006, 51, 1161-1167.	26000	308.15	2.40671	2.2738	-5.52235	2.32337	-3.46276
1158	training set	1-decyl-3-methylimidazolium bis(trifluoromethylsulfonyl)imide	A. Ahosseini and A. M. Scurto, Int. J. Thermophys, 2008, 29, 1222-1243.	68870	298.15	2.40993	2.50389	3.89871	2.27488	-5.60403
1159	training	1-butyl-3-methylimidazolium hexafluorophosphate	O.O. Okoturo, T.J. VanderNoot, Temperature dependence of viscosity for room temperature ionic liquids, Journal of Electroanalytical Chemistry, 568 (2004) 167–181	101.325	283.15	2.4133	2.77582	15.0216	2.69217	11.5557
1160	training set	1-butyl-3-methylimidazolium tetrafluoroborate	K. R. Harris, M. Kanakubo and L. A. Woolf, J. Chem. Eng. Data, 2007, 52, 2425-2430.	250139	323.15	2.41647	2.64752	9.56138	2.34461	-2.97388
1161	training set	Trimethyl(butyl)ammonium bis(trifluoromethylsulfonyl)imide	H. Tokuda, S. Tsuzuki, M. A. B. H. Susan, K. Hayamizu and M. Watanabe, J. Phys. Chem. B, 2006, 110, 19593-19600.	101.325	283.1	2.41764	2.14008	-11.4808	2.14112	-11.4374
1162	test set	1-butyl-3-methyl imidazolium octylsulfate	P. Wasserscheid, R. van Hal and A. Bosmann, Green Chem., 2002, 4, 400-404.	101.325	313.1	2.4188	1.77007	-26.8202	2.24859	-7.03684
1163	training	1-(2-methoxyethyl)-3-methylimidazolium tetrafluoroborate	Branco L C, Rosa J N, Moura Ramos J J, et al. Preparation and characterization of new room temperature ionic liquids. Chem. Eur. J. 2002. 8, 3671-3677.	101.325	293.15	2.41963	2.08479	-13.8384	2.04501	-15.4823
1164	test	1-(2-methoxyethyl)-3-methylimidazolium tetrafluoroborate	Luis C. Branco,Joao N. Rosa, Joaquim J. Moura Ramos, and Carlos A. M. Afonso, Preparation and Characterization of New Room Temperature Ionic Liquids, Chem. Eur. J., 2002, 8, No. 16	101.325	293.15	2.41963	2.08479	-13.8384	2.04501	-15.4823
1165	training set	1-methyl-3-octylimidazolium hexafluorophosphate	A. B. Pereiro and J. L. Legido, J. Chem. Thermodyn., 2007, 39, 1168–1175.	101.325	313.15	2.42034	2.49331	3.01499	2.62505	8.45808
1166	training set	1-butyl-3-methylimidazolium tetrafluoroborate	K. R. Harris, M. Kanakubo and L. A. Woolf, J. Chem. Eng. Data, 2007, 52, 2425-2430.	100	283.15	2.42111	2.37237	-2.01317	2.46631	1.8669
1167	test set	1-butyl-3-methylimidazolium tetrafluoroborate	K. R. Harris, M. Kanakubo and L. A. Woolf, J. Chem. Eng. Data, 2007, 52, 2425-2430.	100	283.15	2.42127	2.37237	-2.01964	2.46631	1.86017
1168	test	1-butyl-3-methylimidazolium hexafluorophosphate	M. Fukuda , Kajimoto, M. Terazima , Y. Kimura, Application of the transient grating method to the investigation of the photo-thermalization process of malachite green in room temperature ionic liquids, Journal of Molecular Liquids 134 (2007) 49-54.	101.325	298.15	2.42325	2.52082	4.02647	2.44991	1.10021
1169	test set	1-butyl-3-methylimidazolium nitrate	K. R. Seddon, A. S. Stark, M.J. Torres, M. Abraham, L. Moens, Eds., ACS Symposium Series 819, American Chemical Society: Washington DC, 2002, 34-49.	101.325	293.15	2.42488	2.58051	6.41822	2.39819	-1.10062
1170	training set	1-butyl-3-methylimidazolium tetrafluoroborate	K. R. Harris, M. Kanakubo and L. A. Woolf, J. Chem. Eng. Data, 2007, 52, 2425-2430.	800	283.15	2.42537	2.37504	-2.07502	2.46729	1.72854
1171	training set	1-octyl-3-methylpyridinium bis(trifluoromethylsulfonyl)imide	J. M. Crosthwaite, M. J. Muldoon, J. N. K. Dixon, J. L. Anderson and J. F. Brennecke, J. Chem. Thermodyn, 2005, 37, 559-568.	101.325	283	2.42813	2.38535	-1.76178	2.40131	-1.10467
1172	training	Trihexyl-tetradecylphosphonium dicyanoamide	Breitbach Z S, Armstrong D W. Characterization of phosphonium ionic liquids through a linear solvation energy relationship and their use as glc stationary phases. Anal. Bioanal. Chem. 2008. 390, 1605- 1617.	101.325	303.15	2.42915	3.36337	38.4583	2.4659	1.51254
1173	test	1-butyl-3-methylimidazolium hexafluorophosphate	Qi M Y, Wu G Z, Li Q M, et al. Gamma-radiation effect on ionic liquid [bmim] [BF4]. Radiat. Phys. Chem. 2008. 77, 877-883.	101.325	298.15	2.42975	2.52082	3.7479	2.44991	0.82948
1174	training set	1-butyl-3-methylimidazolium bis((trifluoromethyl)sulfonyl)amide	K. R. Harris, M. Kanakubo, L. A. Bis(trifluoromethylsulfonyl)imide. Woolf, J. Chem. Eng. Data, 2007, 52, 1080-1085.	150200	298.15	2.4304	2.4954	2.67457	2.28916	-5.81146
1175	training	1-butyl-3-methylimidazolium hexafluorophosphate	Ramesh L. Gardas, Joao A.P. Coutinho, A group contribution method for viscosity estimation of ionic liquids, Fluid Phase Equilibria, 266 (2008) 195-201.	101.325	298.15	2.43185	2.52082	3.65858	2.44991	0.74267
1176	training set	1-butyl-3-methylimidazolium hexafluorophosphate	K. R. Harris, L. A. Woolf and M. Kanakubo, J. Chem. Eng. Data, 2005, 50, 1777-1782.	100	298.15	2.43297	2.52081	3.61048	2.4499	0.69599
1177	training set	1-butyl-3-methylimidazolium hexafluorophosphate	K. R. Harris, L. A. Woolf and M. Kanakubo, J. Chem. Eng. Data, 2005, 50, 1777-1782.	100	298.15	2.43616	2.52081	3.47481	2.4499	0.56414
1178	training set	1-octyl-3-methylimidazolium tetrafluoroborate	K. R. Harris, M. Kanakubo and L. A. Woolf, J. Chem. Eng. Data, 2006, 51, 1161-1167.	175100	333.15	2.43838	2.41836	-0.82083	2.35832	-3.28333
1179	training set	1-hexyl-3-methylimidazolium hexafluorophosphate	K. R. Harris, M. Kanakubo, L. A. Bis(trifluoromethylsulfonyl)imide. Woolf, J. Chem. Eng. Data, 2007, 52, 1080-1085.	200200	348.15	2.43854	2.56249	5.08296	2.39918	-1.61406
1180	training	1-butyl-3-methylimidazolium hexafluorophosphate	Dong B, Xing Y H, Xu J K, et al. Electrosyntheses of free-standing and highly conducting polyselenophene films in an ionic liquid. Electrochim. Acta. 2008. 53, 5745-5751. References 473	101.325	298.15	2.43933	2.52082	3.34044	2.44991	0.43348
1181	training set	1-hexyl-3-methylimidazolium hexafluorophosphate	K. R. Harris, M. Kanakubo, L. A. Bis(trifluoromethylsulfonyl)imide. Woolf, J. Chem. Eng. Data, 2007, 52, 1080-1085.	120800	333.15	2.44044	2.51418	3.02167	2.42931	-0.45624
1182	training set	1-hexyl-3-methylimidazolium hexafluorophosphate	K. R. Harris, M. Kanakubo, L. A. Bis(trifluoromethylsulfonyl)imide. Woolf, J. Chem. Eng. Data, 2007, 52, 1080-1085.	25700	313.15	2.44201	2.4909	2.00204	2.52015	3.19979
1183	training set	1-methyl-3-octylimidazolium hexafluorophosphate	K. R. Harris, M. Kanakubo and L. A. Woolf, J. Chem. Eng. Data, 2006, 51, 1161-1167.	101.325	313.15	2.44217	2.49331	2.09416	2.62505	7.4886
1184	training set	1-butyl-3-methylimidazolium tetrafluoroborate	K. R. Seddon, A. S. Stark, M.J. Torres, M. Abraham, L. Moens, Eds., ACS Symposium Series 819, American Chemical Society: Washington DC, 2002, 34-49.	101.325	283.15	2.44248	2.37237	-2.87028	2.46631	0.97571
1185	training set	1-ethyl-3-methyl imidazolium hydrogen sulfate	A. J. L. Costa, J. M. S. S. Esperança, I. M. Marrucho and L. s. P. N. Rebelo, J. Chem. Eng. Data, 2011, 56, 3433-3441.	101.325	328.15	2.44669	2.58029	5.46056	2.4236	-0.94383
1186	training	1-butyl-3-methylimidazolium chloride	Qinglin Kuang, Jun Zhang, and Zhigang Wang, Revealing Long-Range Density Fluctuations in Dialkylimidazolium Chloride Ionic Liquids by Dynamic Light Scattering, J. Phys. Chem. B, 111 (2007) 9858-9863.	101.325	338	2.44716	2.73286	11.6746	2.53407	3.55155
1187	test	1-butyl-3-methylimidazolium chloride	Kuang Q L, Zhang J, Wang Z G. Revealing long-range density fluctuations in dialkylimidazolium chloride ionic liquids by dynamic light scattering. J. Phys. Chem. B. 2007. 111, 9858-9863.	101.325	338	2.44716	2.73286	11.6746	2.53407	3.55155
1188	training set	1-butyl-3-methyl-imidazolium bis(trifluoromethylsulfonyl)imide	K. R. Harris, M. Kanakubo, L. A. Bis(trifluoromethylsulfonyl)imide. Woolf, J. Chem. Eng. Data, 2007, 52, 1080-1085.	74100	283.15	2.44762	2.4597	0.49357	2.25731	-7.77545
1189	training set	1-butyl-3-methylimidazolium octylsulfate	J. Jacquemin, P. Husson, V. Majer, A. A. H. Padua and M. F. C. Gomes, Green Chem., 2008, 10, 944-950.	101.325	314.25	2.44871	1.75052	-28.5125	2.23746	-8.6269
1190	training set	1-butyl-3-methylimidazolium hexafluorophosphate	K. R. Harris, L. A. Woolf and M. Kanakubo, J. Chem. Eng. Data, 2005, 50, 1777-1782.	125500	323.15	2.44871	2.57484	5.15088	2.66045	8.64718
1191	training set	1-butyl-3-methylimidazolium hexafluorophosphate	W. Fan, Q. Zhou, J. Sun and S. J. Zhang, J. Chem. Eng. Data, 2009, 54, 2307-2311.	101.325	298.15	2.45063	2.52082	2.86404	2.44991	-0.02952
1192	training	1-butyl-3-methylimidazolium hexafluorophosphate	K. S. Mali, G. B. Dutt, and T. Mukherjee, Photoisomerization of cyanine derivatives in 1-butyl-3-methylimidazolium hexafluorophosphate and aqueous glycerol: Influence of specific interactions, J. Chem. Phys., 128 (2008) 124515.	101.325	293	2.45117	2.60837	6.41305	2.48302	1.29922
1193	training set	1-octyl-3-methylimidazolium iodide	M. H. Ghatee, M. Zare, F. Moosavi and A. R. Zolghadr, J. Chem. Eng. Data, 2010, 55, 3084-3088.	101.325	323.15	2.45148	2.32331	-5.22815	2.39241	-2.4096
1194	training set	1-octyl-3-methylimidazolium chloride	K. R. Seddon, A. S. Stark, M.J. Torres, M. Abraham, L. Moens, Eds., ACS Symposium Series 819, American Chemical Society: Washington DC, 2002, 34-49.	101.325	353.15	2.45179	2.7028	10.2379	2.26754	-7.51479
1195	training	1-(2-methoxyethyl)-3-methylimidazolium hexafluorophosphate	Zhang, S., Ionic liquids : physicochemical properties. Elsevier: Amsterdam ; London, 2009.	101.325	293.15	2.45271	2.48823	1.44838	2.66431	8.62733
1196	test	1-(2-methoxyethyl)-3-methylimidazolium hexafluorophosphate	Luis C. Branco,Joao N. Rosa, Joaquim J. Moura Ramos, and Carlos A. M. Afonso, Preparation and Characterization of New Room Temperature Ionic Liquids, Chem. Eur. J., 2002, 8, No. 16	101.325	293.15	2.45271	2.48823	1.44838	2.66431	8.62733
1197	training	1-butyl-3-methylimidazolium hexafluorophosphate	Baker S N, Baker G A, Kane M A, et al. The cybotactic region surrounding fluorescent probes dissolved in 1-butyl-3-methylimidazolium hexafluorophosphate: Effects of temperature and added carbon dioxide. J. Phys. Chem. B. 2001. 105, 9663-9668.	101.325	293.15	2.45611	2.60582	6.09539	2.48184	1.04785
1198	training set	1-butyl-3-methylimidazolium methylsulfate	A. B.Pereiro, P. Verdía, E. Tojo, A. Rodríguez, J. Chem. Eng. Data, 2007, 52, (2), 377-380.	101.325	293.15	2.46088	2.45221	-0.35243	2.36724	-3.80529
1199	training	1-butyl-3-methylimidazolium hexafluorophosphate	Hideaki Shirota, Keiko Nishikawa, and Tateki Ishida，Atom Substitution Effects of [XF6]- in Ionic Liquids. 1. Experimental Study, J. Phys. Chem. B, 113 (2009) 9831-9839.	101.325	297	2.46181	2.54037	3.19088	2.45731	-0.18275
1200	training set	1-hexyl-3-methylimidazolium hexafluorophosphate	K. R. Harris, M. Kanakubo, L. A. Bis(trifluoromethylsulfonyl)imide. Woolf, J. Chem. Eng. Data, 2007, 52, 1080-1085.	76000	323.15	2.46345	2.51305	2.01327	2.51645	2.15152
1201	test	1-hexyl-3-methylimidazolium bis(trifluoromethylsulfonyl)imide	Jason A. Widegren and Joseph W. Magee, Density, Viscosity, Speed of Sound, and Electrolytic Conductivity for the Ionic Liquid 1-hexyl-3-methylimidazolium Bis(trifluoromethylsulfonyl)imide and Its Mixtures with Water, J. Chem. Eng. Data, 52 (2007) 2331-2338.	101.325	273.15	2.46419	2.47432	0.4111	2.48131	0.69458
1202	training set	1-butyl-3-methyl imidazolium bis(pentafluoroethylsulfonyl)imide	H. Tokuda, S. Tsuzuki, M. A. B. H. Susan, K. Hayamizu and M. Watanabe, J. Phys. Chem. B, 2006, 110, 19593-19600.	101.325	283.1	2.46479	2.09284	-15.0906	2.25284	-8.59929
1203	training	1-butyl-3-methylimidazolium hexafluorophosphate	Zhu Jiqin, Chen Jian, Li Chengyue, and Fei Weiyang, Viscosities and Interfacial Properties of 1-Methyl-3-butylimidazolium Hexafluorophosphate and 1-Isobutenyl-3-methylimidazolium tetrafluoroborate Ionic Liquids, J. Chem. Eng. Data, 52 (2007) 812-816.	101.325	293.15	2.46835	2.60582	5.5693	2.48184	0.54679
1204	test set	1-methyl-3-octylimidazolium hexafluorophosphate	K. R. Harris, M. Kanakubo and L. A. Woolf, J. Chem. Eng. Data, 2006, 51, 1161-1167.	101.325	343.15	2.47159	1.98331	-19.7556	2.04909	-17.0942
1205	training	N,N,N-trioctyl-methylammonium dicyanoamide	Kulkarni P S, Branco L C, Crespo J G, et al. Comparison of physicochemical properties of new ionic liquids based on imidazolium, quaternary ammonium, and guanidinium cations. Chemistry-A European J. 2007. 13, 8478-8488.	101.325	293.15	2.47712	3.13166	26.4234	2.31613	-6.49902
1206	training set	1-octyl-3-methylimidazolium hexafluorophosphate	K. R. Harris, M. Kanakubo and L. A. Woolf, J. Chem. Eng. Data, 2006, 51, 1161-1167.	101.325	333.15	2.47813	2.15331	-13.1073	2.20212	-11.1378
1207	training set	1-octyl-3-methylimidazolium tetrafluoroborate	Y. A. Sanmamed, D. Gonzalez-Salgado, J. Troncoso, C. A. Cerdeirina and L. Romani, Fluid Phase Equilibria, 2007, 252, 96-102.	101.325	293.15	2.47842	2.42987	-1.95891	2.68968	8.52414
1208	training set	1-decyl-3-methylimidazolium bis(trifluoromethylsulfonyl)imide	A. Ahosseini and A. M. Scurto, Int. J. Thermophys, 2008, 29, 1222-1243.	83290	298.15	2.47871	2.55897	3.23799	2.34442	-5.41779
1209	training set	1-butyl-3-methylimidazolium hexafluorophosphate	K. R. Harris, L. A. Woolf and M. Kanakubo, J. Chem. Eng. Data, 2005, 50, 1777-1782.	50300	308.15	2.48001	2.54258	2.52281	2.53472	2.20608
1210	test set	1-butyl-3-methylimidazolium tetrafluoroborate	K. R. Harris, M. Kanakubo and L. A. Woolf, J. Chem. Eng. Data, 2007, 52, 2425-2430.	11000	283.15	2.48029	2.41401	-2.67239	2.48049	0.00811
1211	training set	1-octyl-3-methylimidazolium tetrafluoroborate	K. R. Harris, M. Kanakubo and L. A. Woolf, J. Chem. Eng. Data, 2006, 51, 1161-1167.	125500	323.15	2.48159	2.39889	-3.33242	2.45503	-1.07013
1212	training set	1-ethyl-3-methyl imidazolium ethylsulfate	H. Rodriguez, J. F. Brennecke, J. Chem. Eng. Data, 2006, 51, 2145-2155.	101.325	278.15	2.48855	2.57012	3.27794	2.59522	4.28658
1213	training set	1-butyl-3-methylimidazolium tetrafluoroborate	K. R. Harris, M. Kanakubo and L. A. Woolf, J. Chem. Eng. Data, 2007, 52, 2425-2430.	101100	298.15	2.48897	2.50319	0.57128	2.68903	8.03786
1214	training	1-butyl-3-methylimidazolium hexafluorophosphate	Branco L C, Rosa J N, Moura Ramos J J, et al. Preparation and characterization of new room temperature ionic liquids. Chem. Eur. J. 2002. 8, 3671-3677.	101.325	293.15	2.48897	2.60582	4.69445	2.48184	-0.28644
1215	training set	1-butyl-3-methyl imidazolium acetate	J. M. Crosthwaite, M. J. Muldoon, J. N. K. Dixon, J. L. Anderson and J. F. Brennecke, J. Chem. Thermodyn, 2005, 37, 559-568.	101.325	303	2.48996	2.75654	10.7063	2.2772	-8.5447
1216	training	1-butyl-3-methylimidazolium hexafluorophosphate	McFarlane, J.; Ridenour, W. B.; Luo, H.; Hunt, R. D.; DePaoli, D. W.; Room Temperature Ionic Liquids for Separating Organics from Produced Water ; Sep. Sci. Technol., 40 (6) 1245-1265.	101.325	298.1	2.49136	2.52167	1.21642	2.45025	-1.65025
1217	training set	1-hexyl-3-methylimidazolium chloride	K. R. Seddon, A. S. Stark, M.J. Torres, M. Abraham, L. Moens, Eds., ACS Symposium Series 819, American Chemical Society: Washington DC, 2002, 34-49.	101.325	343.15	2.49276	2.7726	11.2262	2.47525	-0.70228
1218	training	1-butyl-3-methylimidazolium hexafluorophosphate	Deng M J, Chen P Y, Leong T I, et al. Dicyanamide anion based ionic liquids for electrodeposition of metals. Electrochem. Commun. 2008. 10, 213-216.	101.325	303.15	2.49415	2.43582	-2.33897	2.39902	-3.81429
1219	training	1-butyl-3-methylimidazolium hexafluorophosphate	Hélène Olivier-Bourbigou, Lionel Magna, Ionic liquids: perspectives for organic and catalytic reactions, Journal of Molecular Catalysis A: Chemical, 182 (2002) 419-437	101.325	303.15	2.49415	2.43582	-2.33897	2.39902	-3.81429
1220	training	1-butyl-3-methylimidazolium hexafluorophosphate	P.A.Z. Suarez ,S .Einloft, J.E.L. Dullius, R.F. de Souza and J. Dupont, Synthesis and physical-chemical properties of ionic liquids based on l -butyl-3-methylimidazolium cation, J. Chim. Phys., 95 (1998) 1626-1639.	101.325	303.15	2.49415	2.43582	-2.33897	2.39902	-3.81429
1221	training	1-propyl-3-methylimidazolium hexafluorophosphate	Suarez P A Z, Einloft S, Dullius J E L, et al. Synthesis and physicalchemical properties of ionic liquids based on 1-butyl-3-methylimidazolium cation. J. Chem. Phys. Phys. Chem. Biol. 1998. 95, 1626- 1639.	101.325	298.15	2.49415	2.42675	-2.70254	2.6931	7.97666
1222	test	1-butyl-3-methylimidazolium hexafluorophosphate	Wu B, Reddy R G, Rogers R D. Novel ionic liquid thermal storge for solar thermal electric power system.Proceedings of solar forum, solar energy: the power to choose. Washington, DC. 2001.	101.325	298.15	2.49415	2.52082	1.069	2.44991	-1.77407
1223	test	1-butyl-3-methylimidazolium hexafluorophosphate	Wu B.Q., Reddy R. G., Rogers R.D. Proceedings of Solar Forum, Solar Energy: The power to Choose April 21-25, 2001, Washington, DC	101.325	298.15	2.49415	2.52082	1.069	2.44991	-1.77407
1224	training set	1-butyl-3-methylimidazolium nitrate	B. Mokhtarani, A. Sharifi, H. R. Mortaheb, M. Mirzaei, M. Mafi and F. Sadeghian, J. Chem. Thermodyn, 2009, 41, 1432-1438.	101.325	288.15	2.49417	2.66551	6.86978	2.57097	3.07936
1225	training set	1-butylpyridinium tetrafluoroborate	B. Mokhtarani, A. Sharifi, H. R. Mortaheb, M. Mirzaei, M. Mafi and F. Sadeghian, J. Chem. Thermodyn, 2009, 41, 323-329.	101.325	288.15	2.49621	2.30482	-7.66738	2.28383	-8.50824
1226	training set	1-hexyl-3-methylimidazolium tetrafluoroborate	K. R. Seddon, A. S. Stark, M.J. Torres, M. Abraham, L. Moens, Eds., ACS Symposium Series 819, American Chemical Society: Washington DC, 2002, 34-49.	101.325	293.15	2.49693	2.32967	-6.69862	2.28566	-8.46116
1227	training set	1-hexyl-3-methylimidazolium tetrafluoroborate	Y. A. Sanmamed, D. Gonzalez-Salgado, J. Troncoso, C. A. Cerdeirina and L. Romani, Fluid Phase Equilibria, 2007, 252, 96-102.	101.325	288.15	2.49927	2.41467	-3.38499	2.41773	-3.26249
1228	test	1-ethyl-3-methylimidazolium ethylsulfate	Andreas P. Froba, Heiko Kremer, and Alfred Leipertz, Density, Refractive Index, Interfacial Tension, and Viscosity of Ionic Liquids [EMIM][EtSO4], [EMIM][NTf2], [EMIM][N(CN)2], and [OMA][NTf2] in Dependence on Temperature at Atmospheric Pressure, J. Phys. Chem. B, 112 (2008) 12420-12430.	101.325	278.15	2.49955	2.60104	4.06023	2.41463	-3.39757
1229	training set	1-hexyl-2,3-dimethylimidazolium bis(trifluoromethylsulfonyl)imide	J. M. Crosthwaite, M. J. Muldoon, J. N. K. Dixon, J. L. Anderson and J. F. Brennecke, J. Chem. Thermodyn, 2005, 37, 559-568.	101.325	283	2.50106	2.32769	-6.93179	2.28968	-8.45166
1230	training set	1-hexyl-3-methylimidazolium iodide	M. H. Ghatee, M. Zare, F. Moosavi and A. R. Zolghadr, J. Chem. Eng. Data, 2010, 55, 3084-3088.	101.325	318.15	2.50325	2.30811	-7.79534	2.34462	-6.337
1231	training set	1-butyl-3-methyl imidazolium octylsulfate	M.J. Davila, S. Aparicio, R. Alcalde, B. Garcia, J.M. Leal, Green Chem., 2007, 9, 221–232.	101.325	308.15	2.50461	1.85422	-25.9676	2.32139	-7.31521
1232	training set	1-butyl-3-methylimidazolium iodide	M. H. Ghatee, M. Zare, F. Moosavi and A. R. Zolghadr, J. Chem. Eng. Data, 2010, 55, 3084-3088.	101.325	308.15	2.50678	2.35082	-6.22164	2.30216	-8.16267
1233	training set	1-butyl-3-methylimidazolium hexafluorophosphate	K. R. Harris, L. A. Woolf and M. Kanakubo, J. Chem. Eng. Data, 2005, 50, 1777-1782.	12100	298.15	2.5172	2.56665	1.96456	2.48229	-1.38698
1234	training set	1-ethyl-3-methylimidazolium n-butylsulfate	A. J. L. Costa, J. M. S. S. Esperança, I. M. Marrucho and L. s. P. N. Rebelo, J. Chem. Eng. Data, 2011, 56, 3433-3441.	101.325	288.15	2.52179	2.28469	-9.40197	2.3107	-8.3707
1235	training set	1-butyl-3-methylimidazolium chloride	K. R. Seddon, A. S. Stark, M.J. Torres, M. Abraham, L. Moens, Eds., ACS Symposium Series 819, American Chemical Society: Washington DC, 2002, 34-49.	101.325	343.15	2.52375	2.64531	4.81645	2.35969	-6.50071
1236	training set	1-octyl-3-methyl imidazolium tetrafluoroborate	K. R. Harris, M. Kanakubo and L. A. Woolf, J. Chem. Eng. Data, 2006, 51, 1161-1167.	200000	333.15	2.52388	2.51348	-0.41195	2.39139	-5.24938
1237	training set	1-octyl-3-methylimidazolium tetrafluoroborate	B. Mokhtarani, M. M. Mojtahedi, H. R. Mortaheb, M. Mafi, F. Yazdani and F. Sadeghian, J. Chem. Eng. Data, 2008, 53, 677-682.	101.325	298.15	2.52397	2.34487	-7.09596	2.55961	1.41206
1238	training set	1-decyl-3-methylimidazolium bis(trifluoromethylsulfonyl)imide	A. Ahosseini and A. M. Scurto, Int. J. Thermophys, 2008, 29, 1222-1243.	93030	298.15	2.52724	2.59618	2.72777	2.38474	-5.63864
1239	training set	1-octyl-3-methylimidazolium tetrafluoroborate	K. R. Harris, M. Kanakubo and L. A. Woolf, J. Chem. Eng. Data, 2006, 51, 1161-1167.	50700	308.15	2.52776	2.36816	-6.31401	2.42712	-3.98159
1240	test set	1-hexyl-3-methyl imidazolium chloride	E. Gómez, B. González, A. Domínguez, E. Tojo, J. Tojo, J. Chem. Eng. Data, 2006, 51, 696-701.	101.325	343.15	2.53084	2.7726	9.5526	2.47525	-2.19635
1241	test	1-butyl-3-methylimidazolium hexafluorophosphate	Pereiro, A. B.; Legido, J. L.; Rodriguez, A.; Physical properties of ionic liquids based on 1-alkyl-3-methylimidazolium cation and hexafluorophosphate as anion and temperature dependence; J. Chem. Thermodyn. 39 1168-1175.	101.325	293.15	2.5321	2.60582	2.91112	2.48184	-1.98492
1242	training set	1-octyl-3-methylimidazolium tetrafluoroborate	K. R. Harris, M. Kanakubo and L. A. Woolf, J. Chem. Eng. Data, 2006, 51, 1161-1167.	100	298.15	2.53275	2.34486	-7.41822	2.55961	1.06042
1243	training set	1-ethyl-3-methyl imidazolium chloride	K. R. Seddon, A. S. Stark, M.J. Torres, M. Abraham, L. Moens, Eds., ACS Symposium Series 819, American Chemical Society: Washington DC, 2002, 34-49.	101.325	323.15	2.53275	2.83757	12.0353	2.73552	8.00582
1244	training set	1-hexyl-3-methylimidazolium hexafluorophosphate	A. B. Pereiro and J. L. Legido, J. Chem. Thermodyn., 2007, 39, 1168–1175.	101.325	303.15	2.53469	2.56311	1.12136	2.66493	5.13848
1245	training	1-hexyl-3-methylimidazolium hexafluorophosphate	Pereiro, A. B.; Legido, J. L.; Rodriguez, A.; Physical properties of ionic liquids based on 1-alkyl-3-methylimidazolium cation and hexafluorophosphate as anion and temperature dependence; J. Chem. Thermodyn. 39 1168-1175.	101.325	303.15	2.53469	2.56311	1.12152	2.66493	5.13865
1246	training set	1-octyl-3-methylimidazolium hexafluorophosphate	K. R. Harris, M. Kanakubo and L. A. Woolf, J. Chem. Eng. Data, 2006, 51, 1161-1167.	101.325	323.15	2.5427	2.32331	-8.62811	2.39241	-5.91068
1247	training	1-propyl-3-methylimidazolium iodide	Philipp Wachter, Markus Zistler, Christian Schreiner, Matthias Fleischmann, Dirk Gerhard, Peter Wasserscheid,Joseph Barthel, and Heiner J. Gores, Temperature Dependence of the Non-Stokesian Charge Transport in Binary Blends of Ionic Liquids, J. Chem. Eng. Data, 54 (2009) 491-497.	101.325	313.15	2.54407	2.17175	-14.6348	2.53055	-0.53141
1248	training set	1-butyl-3-methylimidazolium nitrate	K. R. Seddon, A. S. Stark, M.J. Torres, M. Abraham, L. Moens, Eds., ACS Symposium Series 819, American Chemical Society: Washington DC, 2002, 34-49.	101.325	303.15	2.54531	2.53781	-0.29466	2.44839	-3.80798
1249	test	N,N,N-trioctyl-methylammonium bis((trifluoromethyl)sulfonyl)imide	Kulkarni P S, Branco L C, Crespo J G, et al. Comparison of physicochemical properties of new ionic liquids based on imidazolium, quaternary ammonium, and guanidinium cations. Chemistry-A European J. 2007. 13, 8478-8488.	101.325	293.15	2.549	2.95026	15.7418	2.55894	0.38982
1250	training set	1-methyl-3-octylimidazolium hexafluorophosphate	A. B. Pereiro and J. L. Legido, J. Chem. Thermodyn., 2007, 39, 1168–1175.	101.325	308.15	2.55061	2.57831	1.08613	2.74867	7.76512
1251	training set	1-hexyl-3-methylimidazolium hexafluorophosphate	K. R. Harris, M. Kanakubo, L. A. Bis(trifluoromethylsulfonyl)imide. Woolf, J. Chem. Eng. Data, 2007, 52, 1080-1085.	100	303.15	2.55242	2.56311	0.41874	2.66493	4.40801
1252	training set	1-ethyl-3-methyl imidazolium hydrogen sulfate	A. J. L. Costa, J. M. S. S. Esperança, I. M. Marrucho and L. s. P. N. Rebelo, J. Chem. Eng. Data, 2011, 56, 3433-3441.	101.325	323.15	2.55242	2.66529	4.4222	2.53755	-0.58252
1253	training set	1-hexyl-3-methylimidazolium hexafluorophosphate	K. R. Harris, M. Kanakubo, L. A. Bis(trifluoromethylsulfonyl)imide. Woolf, J. Chem. Eng. Data, 2007, 52, 1080-1085.	100	303.15	2.55255	2.56311	0.41363	2.66493	4.40269
1254	training set	1-hexyl-3-methylimidazolium tetrafluoroborate	E. Rilo, J. Vila, J. Pico, S. Garcia-Garabal, L. Segade, L. M. Varela and O. Cabeza, J. Chem. Eng. Data, 55, 639-644.	101.325	288.15	2.55328	2.41467	-5.4287	2.41773	-5.3088
1255	training set	1-butyl-3-methylimidazolium tetrafluoroborate	K. R. Harris, M. Kanakubo and L. A. Woolf, J. Chem. Eng. Data, 2007, 52, 2425-2430.	24900	283.15	2.55522	2.4671	-3.44843	2.4985	-2.21992
1256	training set	1-hexyl-3-methylimidazolium hexafluorophosphate	K. R. Seddon, A. S. Stark, M.J. Torres, M. Abraham, L. Moens, Eds., ACS Symposium Series 819, American Chemical Society: Washington DC, 2002, 34-49.	101.325	303.15	2.55991	2.56311	0.12512	2.66493	4.10267
1257	training	1-hexyl-3-methylimidazolium hexafluorophosphate	M. Brett Meredith, C. Heather McMillen, Jonathan T. Goodman, Timothy P. Hanusa，Ambient temperature imidazolium-based ionic liquids with tetrachloronickelate(II) anions, Polyhedron 28 (2009) 2355-2358.	101.325	303.15	2.55991	2.56311	0.12526	2.66493	4.10281
1258	training	1-butyl-3-methylimidazolium hexafluorophosphate	Qi M Y, Wu G Z, Li Q M, et al. Gamma-radiation effect on ionic liquid [bmim] [BF4]. Radiat. Phys. Chem. 2008. 77, 877-883.	101.325	293.15	2.56431	2.60582	1.61861	2.48184	-3.21594
1259	training set	1-butyl-3-methylimidazolium hexafluorophosphate	K. R. Harris, L. A. Woolf and M. Kanakubo, J. Chem. Eng. Data, 2005, 50, 1777-1782.	100	293.15	2.56703	2.60581	1.51077	2.48184	-3.31859
1260	training set	1-octyl-3-methylimidazolium hexafluorophosphate	K. R. Harris, M. Kanakubo and L. A. Woolf, J. Chem. Eng. Data, 2006, 51, 1161-1167.	101.325	308.15	2.56926	2.57831	0.35236	2.74867	6.98286
1261	training set	1-butyl-3-methylimidazolium hexafluorophosphate	K. R. Harris, L. A. Woolf and M. Kanakubo, J. Chem. Eng. Data, 2005, 50, 1777-1782.	150400	323.15	2.56937	2.66996	3.91489	2.75314	7.15231
1262	training	1-propyl-3-methylimidazolium hexafluorophosphate	McEwen A B, Ngo H L, LeCompte K, et al. Electrochemical properties of imidazolium salt electrolytes for electrochemical capacitor applications. J. Electrochem. Soc. 1999. 146, 1687-1695.	101.325	298.15	2.56937	2.42675	-5.55096	2.6931	4.8156
1263	training	1-(2-methoxyethyl)-3-methylimidazolium tetrafluoroborate	Luis C. Branco,Joao N. Rosa, Joaquim J. Moura Ramos, and Carlos A. M. Afonso, Preparation and Characterization of New Room Temperature Ionic Liquids, Chem. Eur. J., 2002, 8, No. 16	101.325	283.15	2.57322	2.25479	-12.3749	2.3611	-8.24335
1264	training set	1-octyl-3-methylimidazolium hexafluorophosphate	K. R. Harris, M. Kanakubo and L. A. Woolf, J. Chem. Eng. Data, 2006, 51, 1161-1167.	101.325	308.15	2.57357	2.57831	0.1843	2.74867	6.8037
1265	test set	1-octyl-3-methylimidazolium tetrafluoroborate	K. R. Harris, M. Kanakubo and L. A. Woolf, J. Chem. Eng. Data, 2006, 51, 1161-1167.	149900	323.15	2.57576	2.4921	-3.24793	2.51196	-2.47684
1266	test set	1-hexyl-3-methylimidazolium hexafluorophosphate	K. R. Harris, M. Kanakubo, L. A. Bis(trifluoromethylsulfonyl)imide. Woolf, J. Chem. Eng. Data, 2007, 52, 1080-1085.	238500	348.15	2.57749	2.7088	5.09434	2.45809	-4.63253
1267	training set	1-octyl-3-methylimidazolium hexafluorophosphate	K. R. Harris, M. Kanakubo and L. A. Woolf, J. Chem. Eng. Data, 2006, 51, 1161-1167.	101.325	343.15	2.57795	1.98331	-23.0663	2.04909	-20.5147
1268	test set	1-hexyl-3-methylimidazolium hexafluorophosphate	K. R. Harris, M. Kanakubo, L. A. Bis(trifluoromethylsulfonyl)imide. Woolf, J. Chem. Eng. Data, 2007, 52, 1080-1085.	50800	313.15	2.58184	2.58678	0.19141	2.62027	1.48849
1269	training set	1-butyl-3-methylimidazolium hexafluorophosphate	D.Tomida, A.Kumagai, K.Qiao, C.Yokoyama, Int. J. Thermophys, 2006, 27, 39-47.	100	293.15	2.58206	2.60581	0.91989	2.48184	-3.88136
1270	training set	1-hexyl-3-methylimidazolium hexafluorophosphate	K. R. Harris, M. Kanakubo, L. A. Bis(trifluoromethylsulfonyl)imide. Woolf, J. Chem. Eng. Data, 2007, 52, 1080-1085.	100900	323.15	2.58433	2.60816	0.92225	2.61718	1.27118
1271	training set	1-octyl-3-methylimidazolium iodide	M. H. Ghatee, M. Zare, F. Moosavi and A. R. Zolghadr, J. Chem. Eng. Data, 2010, 55, 3084-3088.	101.325	319.15	2.58591	2.39131	-7.52528	2.48102	-4.05621
1272	training set	1-octyl-3-methylimidazolium chloride	E. Gómez, B. González, A. Domínguez, E. Tojo, J. Tojo, J. Chem. Eng. Data, 2006, 51, 696-701.	101.325	343.15	2.58794	2.8728	11.0073	2.48957	-3.80098
1273	training set	1-octyl-3-methylimidazolium hexafluorophosphate	K. R. Harris, M. Kanakubo and L. A. Woolf, J. Chem. Eng. Data, 2006, 51, 1161-1167.	101.325	333.15	2.58805	2.15331	-16.7979	2.20212	-14.912
1274	training set	1-butyl-3-methylimidazolium hexafluorophosphate	W. Fan, Q. Zhou, J. Sun and S. J. Zhang, J. Chem. Eng. Data, 2009, 54, 2307-2311.	101.325	293.15	2.59085	2.60582	0.57769	2.48184	-4.20734
1275	training set	1-butyl-3-methylimidazolium hexafluorophosphate	K. R. Harris, L. A. Woolf and M. Kanakubo, J. Chem. Eng. Data, 2005, 50, 1777-1782.	25700	298.15	2.59106	2.6186	1.06304	2.52892	-2.39835
1276	test set	1-butyl-3-methylimidazolium hexafluorophosphate	K. R. Harris, L. A. Woolf and M. Kanakubo, J. Chem. Eng. Data, 2005, 50, 1777-1782.	24700	298.15	2.59218	2.61478	0.87201	2.525	-2.59158
1277	training set	1-octyl-3-methylimidazolium tetrafluoroborate	K. R. Harris, M. Kanakubo and L. A. Woolf, J. Chem. Eng. Data, 2006, 51, 1161-1167.	11200	298.15	2.59439	2.38727	-7.9835	2.57292	-0.82746
1278	training	1-butyl-3-methylimidazolium hexafluorophosphate	Jing-fu Liu, Gui-bin Jiang, Yu-guang Chi, Ya-qi Cai, Qing-xiang Zhou, and Jing-Tian Hu, Use of Ionic Liquids for Liquid-Phase Microextraction of Polycyclic Aromatic Hydrocarbons, Anal. Chem., 75 (2003) 5870-5876.	101.325	298.15	2.59439	2.52082	-2.83594	2.44991	-5.56916
1279	test	1-butyl-3-methylimidazolium hexafluorophosphate	Liu J F, Jiang G B, Chi Y G, et al. Use of ionic liquids for liquid-phase microextraction of polycyclic aromatic hydrocarbons. Anal. Chem. 2003. 75, 5870-5876.	101.325	298.15	2.59439	2.52082	-2.83594	2.44991	-5.56916
1280	test set	1-butyl-3-methylimidazolium tetrafluoroborate	K. R. Harris, M. Kanakubo and L. A. Woolf, J. Chem. Eng. Data, 2007, 52, 2425-2430.	126200	298.15	2.59539	2.59907	0.14183	2.7565	6.20737
1281	training	1-butyl-3-methylimidazolium hexafluorophosphate	Ann E, Visser W, Matthew R, et al. Characterization of hydrophilic and hydrophobic ionic liquids: Alternatives to volatile organic compounds for liquid-liquid separations. Ionic liquids industrial applications to green chemistry. ACS symposium series. 200	101.325	298.15	2.59879	2.52082	-3.00037	2.44991	-5.72897
1282	training	1-butyl-3-methylimidazolium hexafluorophosphate	Berthod A, Ruiz-Angel M, Carda-Broch S. Ionic liquids in separation techniques. J. Chromatogr. A. 2008. 1184, 6-18.	101.325	298.15	2.60206	2.52082	-3.12225	2.44991	-5.84742
1283	training	1-butyl-3-methylimidazolium hexafluorophosphate	Zhu Jiqin, Chen Jian, Li Chengyue, and Fei Weiyang, Viscosities and Interfacial Properties of 1-Methyl-3-butylimidazolium Hexafluorophosphate and 1-Isobutenyl-3-methylimidazolium tetrafluoroborate Ionic Liquids, J. Chem. Eng. Data, 52 (2007) 812-816.	101.325	288.15	2.60228	2.69082	3.4024	2.54608	-2.15941
1284	training set	1-decyl-3-methylimidazolium bis(trifluoromethylsulfonyl)imide	A. Ahosseini and A. M. Scurto, Int. J. Thermophys, 2008, 29, 1222-1243.	109800	298.15	2.60498	2.66024	2.12127	2.43444	-6.54655
1285	training set	1-methyl-3-octylimidazolium hexafluorophosphate	K. R. Harris, M. Kanakubo and L. A. Woolf, J. Chem. Eng. Data, 2006, 51, 1161-1167.	101.325	323.15	2.6066	2.32331	-10.8681	2.39241	-8.21725
1286	training set	1-octyl-3-methylimidazolium hexafluorophosphate	K. R. Harris, M. Kanakubo and L. A. Woolf, J. Chem. Eng. Data, 2006, 51, 1161-1167.	101.325	308.15	2.6067	2.57831	-1.089	2.74867	5.44627
1287	training set	1-hexyl-3-methylimidazolium hexafluorophosphate	K. R. Harris, M. Kanakubo, L. A. Bis(trifluoromethylsulfonyl)imide. Woolf, J. Chem. Eng. Data, 2007, 52, 1080-1085.	160600	333.15	2.6114	2.66622	2.09918	2.51597	-3.65419
1288	training set	1-butyl-3-methylimidazolium hexafluorophosphate	D.Tomida, A.Kumagai, K.Qiao, C.Yokoyama, Int. J. Thermophys, 2006, 27, 39-47.	5000	293.15	2.61172	2.62453	0.49048	2.49397	-4.50844
1289	training set	1-butyl-3-methylimidazolium hexafluorophosphate	K. R. Harris, L. A. Woolf and M. Kanakubo, J. Chem. Eng. Data, 2005, 50, 1777-1782.	75600	308.15	2.6149	2.63922	0.93013	2.72769	4.31322
1290	training set	1-octyl-3-methyl imidazolium tetrafluoroborate	Y. A. Sanmamed, D. Gonzalez-Salgado, J. Troncoso, C. A. Cerdeirina and L. Romani, Fluid Phase Equilibria, 2007, 252, 96-102.	101.325	288.15	2.61521	2.51487	-3.83678	2.81431	7.61313
1291	training set	1-hexyl-3-methylimidazolium iodide	M. H. Ghatee, M. Zare, F. Moosavi and A. R. Zolghadr, J. Chem. Eng. Data, 2010, 55, 3084-3088.	101.325	314.15	2.61563	2.37611	-9.15714	2.43347	-6.96422
1292	training	1-butyl-3-methylimidazolium acetate	Ramesh L. Gardas, Joao A.P. Coutinho, A group contribution method for viscosity estimation of ionic liquids, Fluid Phase Equilibria, 266 (2008) 195-201.	101.325	298.15	2.61574	2.83899	8.535	2.40367	-8.10758
1293	training set	1-ethyl-3-methylpyridinium ethylsulfate	J. M. Crosthwaite, M. J. Muldoon, J. N. K. Dixon, J. L. Anderson and J. F. Brennecke, J. Chem. Thermodyn, 2005, 37, 559-568.	101.325	283	2.617	2.47143	-5.56266	2.41519	-7.71145
1294	training	1-hexyl-3-methylimidazolium bis(trifluoromethylsulfonyl)imide	Jason A. Widegren and Joseph W. Magee, Density, Viscosity, Speed of Sound, and Electrolytic Conductivity for the Ionic Liquid 1-hexyl-3-methylimidazolium Bis(trifluoromethylsulfonyl)imide and Its Mixtures with Water, J. Chem. Eng. Data, 52 (2007) 2331-2338.	101.325	268.15	2.62055	2.55932	-2.33656	2.6063	-0.54373
1295	training set	1-butyl-3-methylimidazolium iodide	M. H. Ghatee, M. Zare, F. Moosavi and A. R. Zolghadr, J. Chem. Eng. Data, 2010, 55, 3084-3088.	101.325	304.15	2.62521	2.41882	-7.86196	2.38359	-9.20374
1296	training set	1-methyl-3-octylimidazolium hexafluorophosphate	K. R. Harris, M. Kanakubo and L. A. Woolf, J. Chem. Eng. Data, 2006, 51, 1161-1167.	101.325	308.15	2.63367	2.57831	-2.10189	2.74867	4.36645
1297	training set	1-butyl-3-methylimidazolium octylsulfate	M.J. Davila, S. Aparicio, R. Alcalde, B. Garcia, J.M. Leal, Green Chem., 2007, 9, 221–232.	101.325	303.15	2.63709	1.93922	-26.4635	2.43795	-7.55147
1298	training set	1-octyl-3-methylimidazolium tetrafluoroborate	K. R. Seddon, A. S. Stark, M.J. Torres, M. Abraham, L. Moens, Eds., ACS Symposium Series 819, American Chemical Society: Washington DC, 2002, 34-49.	101.325	293.1	2.64246	2.43072	-8.01299	2.69095	1.83502
1299	test set	1-butyl-3-methyl imidazolium acetate	J. M. Crosthwaite, M. J. Muldoon, J. N. K. Dixon, J. L. Anderson and J. F. Brennecke, J. Chem. Thermodyn, 2005, 37, 559-568.	101.325	298	2.64345	2.84154	7.49373	2.40852	-8.88709
1300	training set	1-butyl-3-methylimidazolium hexafluorophosphate	D.Tomida, A.Kumagai, K.Qiao, C.Yokoyama, Int. J. Thermophys, 2006, 27, 39-47.	10000	293.15	2.64542	2.64363	-0.06766	2.50687	-5.23727
1301	training set	1-octyl-3-methylimidazolium tetrafluoroborate	K. R. Harris, M. Kanakubo and L. A. Woolf, J. Chem. Eng. Data, 2006, 51, 1161-1167.	76200	308.15	2.64738	2.46557	-6.86766	2.5869	-2.28438
1302	training set	1-butyl-3-methylimidazolium octylsulfate	P. Wasserscheid, R. van Hal and A. Bosmann, Green Chem., 2002, 4, 400-404.	101.325	303.1	2.65118	1.94007	-26.8223	2.43931	-7.99135
1303	training	Trihexyl-tetradecylphosphonium bis((trifluoromethyl)sulfonyl)imide	Sesto R E D, Corley C, Robertson A, et al. Tetraalkylphosphoniumbased ionic liquids. J. Organomet. Chem. 2005. 690, 2536-2542.	101.325	293.15	2.65321	3.35197	26.3362	2.44176	-7.96958
1304	training	1-butyl-3-methylimidazolium hexafluorophosphate	Andrew P. Abbott and Katy J. McKenzie, Application of ionic liquids to the electrodeposition of metals, Phys. Chem. Chem. Phys., 8 (2006), 4265-4279.	101.325	298	2.65321	2.52337	-4.8939	2.45092	-7.62427
1305	training	1-Propyl-3-methylimidazolium hexafluorophosphate	Baldelli S. Influence of water on the orientation of cations at the surface of a room-temperature ionic liquid: A sum frequency generation vibrational spectroscopic study. J. Phys. Chem. B. 2003. 107, 6148- 6152.	101.325	298.15	2.65321	2.42675	-8.53544	2.6931	1.50354
1306	training set	1-butyl-3-methylimidazolium nitrate	B. Mokhtarani, A. Sharifi, H. R. Mortaheb, M. Mirzaei, M. Mafi and F. Sadeghian, J. Chem. Thermodyn, 2009, 41, 1432-1438.	101.325	283.15	2.65363	2.75051	3.651	2.73475	3.0569
1307	training set	1-octyl-3-methylimidazolium hexafluorophosphate	K. R. Seddon, A. S. Stark, M.J. Torres, M. Abraham, L. Moens, Eds., ACS Symposium Series 819, American Chemical Society: Washington DC, 2002, 34-49.	101.325	303.15	2.65514	2.66331	0.30782	2.86691	7.97589
1308	training	N-methyl-butyl-piperidinium trifluoromethyltrifluoroborate	Zhou Z B, Matsumoto H, Tatsumi K. Cyclic quaternary ammonium ionic liquids with perfluoroalkyltrifluoroborates: Synthesis, characterization, and properties. Chem. Eur. J. 2006. 12, 2196-2212.	101.325	298.15	2.65896	2.00171	-24.7184	2.44701	-7.97125
1309	training	1-ethyl-3-methylimidazolium ethylsulfate	Andreas P. Froba, Heiko Kremer, and Alfred Leipertz, Density, Refractive Index, Interfacial Tension, and Viscosity of Ionic Liquids [EMIM][EtSO4], [EMIM][NTf2], [EMIM][N(CN)2], and [OMA][NTf2] in Dependence on Temperature at Atmospheric Pressure, J. Phys. Chem. B, 112 (2008) 12420-12430.	101.325	273.15	2.66115	2.68604	0.9352	2.66215	0.03757
1310	training set	1-decyl-3-methylimidazolium bis(trifluoromethylsulfonyl)amide	A. Ahosseini and A. M. Scurto, Int. J. Thermophys, 2008, 29, 1222-1243.	122570	298.15	2.66257	2.70902	1.74456	2.45131	-7.93432
1311	test set	1-octyl-3-methylimidazolium tetrafluoroborate	B. Mokhtarani, M. M. Mojtahedi, H. R. Mortaheb, M. Mafi, F. Yazdani and F. Sadeghian, J. Chem. Eng. Data, 2008, 53, 677-682.	101.325	293.15	2.66549	2.42987	-8.83965	2.68968	0.90768
1312	test set	1-ethyl-3-methyl imidazolium hydrogen sulfate	A. J. L. Costa, J. M. S. S. Esperança, I. M. Marrucho and L. s. P. N. Rebelo, J. Chem. Eng. Data, 2011, 56, 3433-3441.	101.325	318.15	2.66558	2.75029	3.17803	2.6706	0.18816
1313	training	Tributyl-tetradecylphosphonium bis((trifluoromethyl)sulfonyl)imide	Sesto R E D, Corley C, Robertson A, et al. Tetraalkylphosphoniumbased ionic liquids. J. Organomet. Chem. 2005. 690, 2536-2542.	101.325	293.15	2.66652	2.95815	10.9367	2.5662	-3.76203
1314	training set	1-butylpyridinium tetrafluoroborate	B. Mokhtarani, A. Sharifi, H. R. Mortaheb, M. Mirzaei, M. Mafi and F. Sadeghian, J. Chem. Thermodyn, 2009, 41, 323-329.	101.325	283.15	2.66698	2.38982	-10.3924	2.45509	-7.94504
1315	training	N-methyl-butylmorpholinium pentafluoroethyltrifluoroborate	Zhou Z B, Matsumoto H, Tatsumi K. Cyclic quaternary ammonium ionic liquids with perfluoroalkyltrifluoroborates: Synthesis, characterization, and properties. Chem. Eur. J. 2006. 12, 2196-2212.	101.325	298.15	2.66839	1.5634	-41.4101	2.45673	-7.93197
1316	test set	1-butyl-3-methylimidazolium hexafluorophosphate	D.Tomida, A.Kumagai, K.Qiao, C.Yokoyama, Int. J. Thermophys, 2006, 27, 39-47.	15000	293.15	2.67025	2.66273	-0.28162	2.52063	-5.60329
1317	test set	1-ethyl-3-methylimidazolium n-butylsulfate	A. J. L. Costa, J. M. S. S. Esperança, I. M. Marrucho and L. s. P. N. Rebelo, J. Chem. Eng. Data, 2011, 56, 3433-3441.	101.325	283.15	2.67062	2.36969	-11.2681	2.42055	-9.36358
1318	test set	1-octyl-3-methylimidazolium tetrafluoroborate	K. R. Harris, M. Kanakubo and L. A. Woolf, J. Chem. Eng. Data, 2006, 51, 1161-1167.	175500	323.15	2.67191	2.58989	-3.0696	2.54997	-4.56376
1319	training set	1-octyl-3-methylimidazolium tetrafluoroborate	K. R. Harris, M. Kanakubo and L. A. Woolf, J. Chem. Eng. Data, 2006, 51, 1161-1167.	100	293.15	2.67486	2.42986	-9.15917	2.68968	0.55412
1320	test set	1-octyl-3-methylimidazolium tetrafluoroborate	K. R. Harris, M. Kanakubo and L. A. Woolf, J. Chem. Eng. Data, 2006, 51, 1161-1167.	100	293.15	2.67486	2.42986	-9.15917	2.68968	0.55412
1321	training set	1-hexyl-3-methylimidazolium hexafluorophosphate	A. B. Pereiro and J. L. Legido, J. Chem. Thermodyn., 2007, 39, 1168–1175.	101.325	298.15	2.6773	2.64811	-1.09016	2.74569	2.55453
1322	training	1-hexyl-3-methylimidazolium hexafluorophosphate	Pereiro, A. B.; Legido, J. L.; Rodriguez, A.; Physical properties of ionic liquids based on 1-alkyl-3-methylimidazolium cation and hexafluorophosphate as anion and temperature dependence; J. Chem. Thermodyn. 39 1168-1175.	101.325	298.15	2.6773	2.64811	-1.09004	2.74569	2.55466
1323	training set	1-octyl-3-methyl imidazolium tetrafluoroborate	K. R. Harris, M. Kanakubo and L. A. Woolf, J. Chem. Eng. Data, 2006, 51, 1161-1167.	26200	298.15	2.67733	2.44457	-8.69385	2.58695	-3.37573
1324	training set	1-butyl-3-methylimidazolium hexafluorophosphate	K. R. Harris, L. A. Woolf and M. Kanakubo, J. Chem. Eng. Data, 2005, 50, 1777-1782.	175200	323.15	2.68215	2.76469	3.07753	2.81932	5.1142
1325	training set	1-butyl-3-methylimidazolium tetrafluoroborate	K. R. Harris, M. Kanakubo and L. A. Woolf, J. Chem. Eng. Data, 2007, 52, 2425-2430.	49600	283.15	2.68556	2.56146	-4.62105	2.55134	-4.998
1326	training set	1-octyl-3-methylimidazolium hexafluorophosphate	A. B. Pereiro and J. L. Legido, J. Chem. Thermodyn., 2007, 39, 1168–1175.	101.325	303.15	2.68933	2.66331	-0.96741	2.86691	6.60317
1327	training	Trihexyl-tetradecylphosphonium dicyanoamide	Sesto R E D, Corley C, Robertson A, et al. Tetraalkylphosphoniumbased ionic liquids. J. Organomet. Chem. 2005. 690, 2536-2542.	101.325	293.15	2.6902	3.53337	31.3424	2.47912	-7.84608
1328	training set	1-hexyl-3-methylimidazolium hexafluorophosphate	K. R. Harris, M. Kanakubo, L. A. Bis(trifluoromethylsulfonyl)imide. Woolf, J. Chem. Eng. Data, 2007, 52, 1080-1085.	100	298.15	2.69583	2.64811	-1.77022	2.74569	1.84947
1329	test set	1-hexyl-3-methylimidazolium hexafluorophosphate	K. R. Harris, M. Kanakubo, L. A. Bis(trifluoromethylsulfonyl)imide. Woolf, J. Chem. Eng. Data, 2007, 52, 1080-1085.	100	298.15	2.69592	2.64811	-1.77349	2.74569	1.84607
1330	training set	1-octyl-3-methyl imidazolium chloride	K. R. Seddon, A. S. Stark, M.J. Torres, M. Abraham, L. Moens, Eds., ACS Symposium Series 819, American Chemical Society: Washington DC, 2002, 34-49.	101.325	343.15	2.69723	2.8728	6.50931	2.48957	-7.6989
1331	training set	1-octyl-3-methylimidazolium iodide	M. H. Ghatee, M. Zare, F. Moosavi and A. R. Zolghadr, J. Chem. Eng. Data, 2010, 55, 3084-3088.	101.325	313.15	2.6988	2.49331	-7.61401	2.62505	-2.73254
1332	test set	1-butyl-3-methylimidazolium tetrafluoroborate	K. R. Harris, M. Kanakubo and L. A. Woolf, J. Chem. Eng. Data, 2007, 52, 2425-2430.	150600	298.15	2.69888	2.69228	-0.24458	2.76024	2.27336
1333	training set	1-butyl-3-methylimidazolium tetrafluoroborate	K. R. Harris, M. Kanakubo and L. A. Woolf, J. Chem. Eng. Data, 2007, 52, 2425-2430.	150700	298.15	2.69949	2.69266	-0.25297	2.76019	2.24853
1334	test set	1-hexyl-3-methylimidazolium hexafluorophosphate	K. R. Harris, M. Kanakubo, L. A. Bis(trifluoromethylsulfonyl)imide. Woolf, J. Chem. Eng. Data, 2007, 52, 1080-1085.	125800	323.15	2.70234	2.70328	0.03486	2.68675	-0.57682
1335	test set	1-butyl-3-methylimidazolium hexafluorophosphate	D.Tomida, A.Kumagai, K.Qiao, C.Yokoyama, Int. J. Thermophys, 2006, 27, 39-47.	20000	293.15	2.70243	2.68183	-0.76228	2.53559	-6.17366
1336	training set	1-methyl-3-octylimidazolium hexafluorophosphate	K. R. Harris, M. Kanakubo and L. A. Woolf, J. Chem. Eng. Data, 2006, 51, 1161-1167.	101.325	303.15	2.71542	2.66331	-1.91893	2.86691	5.57892
1337	training set	1-butyl-3-methylimidazolium hexafluorophosphate	K. R. Harris, L. A. Woolf and M. Kanakubo, J. Chem. Eng. Data, 2005, 50, 1777-1782.	100	288.15	2.71684	2.69081	-0.95802	2.54608	-6.28523
1338	training set	1-hexyl-3-methylimidazolium hexafluorophosphate	K. R. Harris, M. Kanakubo, L. A. Bis(trifluoromethylsulfonyl)imide. Woolf, J. Chem. Eng. Data, 2007, 52, 1080-1085.	76000	313.15	2.71759	2.68305	-1.27113	2.75692	1.44719
1339	test	1-butyl-3-methylimidazolium hexafluorophosphate	Qi M Y, Wu G Z, Li Q M, et al. Gamma-radiation effect on ionic liquid [bmim] [BF4]. Radiat. Phys. Chem. 2008. 77, 877-883.	101.325	288.15	2.71966	2.69082	-1.06063	2.54608	-6.38239
1340	test set	1-octyl-3-methylimidazolium hexafluorophosphate	K. R. Harris, M. Kanakubo and L. A. Woolf, J. Chem. Eng. Data, 2006, 51, 1161-1167.	101.325	323.15	2.71983	2.32331	-14.5787	2.39241	-12.0383
1341	training set	1-octyl-3-methylimidazolium hexafluorophosphate	K. R. Harris, M. Kanakubo and L. A. Woolf, J. Chem. Eng. Data, 2006, 51, 1161-1167.	101.325	308.15	2.72526	2.57831	-5.39203	2.74867	0.85893
1342	test set	1-butyl-3-methylimidazolium nitrate	K. R. Seddon, A. S. Stark, M.J. Torres, M. Abraham, L. Moens, Eds., ACS Symposium Series 819, American Chemical Society: Washington DC, 2002, 34-49.	101.325	283.15	2.734	2.75051	0.60403	2.73475	0.02739
1343	training set	1-butyl-3-methylimidazolium tetrafluoroborate	K. R. Harris, M. Kanakubo and L. A. Woolf, J. Chem. Eng. Data, 2007, 52, 2425-2430.	100	273.15	2.73464	2.54237	-7.03094	2.93017	7.15004
1344	test set	1-butyl-3-methylimidazolium tetrafluoroborate	K. R. Harris, M. Kanakubo and L. A. Woolf, J. Chem. Eng. Data, 2007, 52, 2425-2430.	100	273.15	2.7348	2.54237	-7.03638	2.93017	7.14377
1345	training set	1-butyl-3-methylimidazolium hexafluorophosphate	K. R. Harris, L. A. Woolf and M. Kanakubo, J. Chem. Eng. Data, 2005, 50, 1777-1782.	50600	298.15	2.73719	2.71372	-0.85738	2.65731	-2.91841
1346	test set	1-butyl-3-methylimidazolium hexafluorophosphate	W. Fan, Q. Zhou, J. Sun and S. J. Zhang, J. Chem. Eng. Data, 2009, 54, 2307-2311.	101.325	288.15	2.74239	2.69082	-1.88058	2.54608	-7.15823
1347	training set	1-butyl-3-methylimidazolium hexafluorophosphate	K. R. Harris, L. A. Woolf and M. Kanakubo, J. Chem. Eng. Data, 2005, 50, 1777-1782.	100300	308.15	2.74586	2.73358	-0.44736	2.90736	5.88158
1348	training	1-hexyl-3-methylimidazolium hexafluorophosphate	Jing-fu Liu, Gui-bin Jiang, Yu-guang Chi, Ya-qi Cai, Qing-xiang Zhou, and Jing-Tian Hu, Use of Ionic Liquids for Liquid-Phase Microextraction of Polycyclic Aromatic Hydrocarbons, Anal. Chem., 75 (2003) 5870-5876.	101.325	298.15	2.74819	2.64811	-3.64149	2.74569	-0.09081
1349	training	Trihexyl-tetradecylphosphonium trifluoromethanesulfonate	Breitbach Z S, Armstrong D W. Characterization of phosphonium ionic liquids through a linear solvation energy relationship and their use as glc stationary phases. Anal. Bioanal. Chem. 2008. 390, 1605- 1617.	101.325	303.15	2.74962	3.09998	12.7421	2.53826	-7.68704
1350	training set	1-butyl-3-methylimidazolium iodide	M. H. Ghatee, M. Zare, F. Moosavi and A. R. Zolghadr, J. Chem. Eng. Data, 2010, 55, 3084-3088.	101.325	299.15	2.75274	2.50382	-9.04273	2.44258	-11.2674
1351	training set	1-hexyl-3-methyl imidazolium chloride	K. R. Seddon, A. S. Stark, M.J. Torres, M. Abraham, L. Moens, Eds., ACS Symposium Series 819, American Chemical Society: Washington DC, 2002, 34-49.	101.325	333.15	2.75511	2.9426	6.80521	2.7999	1.62575
1352	training set	1-octyl-3-methylimidazolium tetrafluoroborate	K. R. Harris, M. Kanakubo and L. A. Woolf, J. Chem. Eng. Data, 2006, 51, 1161-1167.	100300	308.15	2.75671	2.55763	-7.22169	2.73226	-0.88697
1353	training set	1-hexyl-3-methylimidazolium iodide	M. H. Ghatee, M. Zare, F. Moosavi and A. R. Zolghadr, J. Chem. Eng. Data, 2010, 55, 3084-3088.	101.325	309.15	2.7574	2.46111	-10.7452	2.5457	-7.67738
1354	training set	1-octyl-3-methyl imidazolium tetrafluoroborate	K. R. Harris, M. Kanakubo and L. A. Woolf, J. Chem. Eng. Data, 2006, 51, 1161-1167.	199800	323.15	2.7614	2.68272	-2.84932	2.55011	-7.65164
1355	training	1-hexyl-3-methylimidazolium hexafluorophosphate	Andrew P. Abbott and Katy J. McKenzie, Application of ionic liquids to the electrodeposition of metals, Phys. Chem. Chem. Phys., 8 (2006), 4265-4279.	101.325	298	2.76716	2.65066	-4.20984	2.74794	-0.69429
1356	training	N,N,N-trioctyl-methylammonium bis((trifluoromethyl)sulfonyl)imide	Gan Q, Rooney D, Xue M, et al. An experimental study of gas transport and separation properties of ionic liquids supported on nanofiltration membranes. J. Membr. Sci. 2006. 280, 948-956.	101.325	293.15	2.77034	2.95026	6.49471	2.55894	-7.63072
1357	training set	1-hexyl-3-methylimidazolium hexafluorophosphate	K. R. Harris, M. Kanakubo, L. A. Bis(trifluoromethylsulfonyl)imide. Woolf, J. Chem. Eng. Data, 2007, 52, 1080-1085.	200100	333.15	2.77735	2.81711	1.43151	2.60475	-6.21468
1358	training set	1-butyl-3-methyl imidazolium octylsulfate	M.J. Davila, S. Aparicio, R. Alcalde, B. Garcia, J.M. Leal, Green Chem., 2007, 9, 221–232.	101.325	298.15	2.77931	2.02422	-27.1682	2.58797	-6.88431
1359	training	1-(2-methoxyethyl)-3-methylimidazolium hexafluorophosphate	Luis C. Branco,Joao N. Rosa, Joaquim J. Moura Ramos, and Carlos A. M. Afonso, Preparation and Characterization of New Room Temperature Ionic Liquids, Chem. Eur. J., 2002, 8, No. 16	101.325	283.15	2.78355	2.65823	-4.50201	2.57155	-7.61619
1360	training set	1-ethyl-3-methyl imidazolium hydrogen sulfate	A. J. L. Costa, J. M. S. S. Esperança, I. M. Marrucho and L. s. P. N. Rebelo, J. Chem. Eng. Data, 2011, 56, 3433-3441.	101.325	313.15	2.78689	2.83529	1.73681	2.81883	1.14626
1361	training	1-hexyl-3-methylimidazolium bis(trifluoromethylsulfonyl)imide	Jason A. Widegren and Joseph W. Magee, Density, Viscosity, Speed of Sound, and Electrolytic Conductivity for the Ionic Liquid 1-hexyl-3-methylimidazolium Bis(trifluoromethylsulfonyl)imide and Its Mixtures with Water, J. Chem. Eng. Data, 52 (2007) 2331-2338.	101.325	263.15	2.78725	2.64432	-5.12786	2.70554	-2.93133
1362	training set	1-butyl-3-methylimidazolium hexafluorophosphate	K. R. Harris, L. A. Woolf and M. Kanakubo, J. Chem. Eng. Data, 2005, 50, 1777-1782.	200000	323.15	2.78958	2.85943	2.50396	2.85185	2.2321
1363	training set	1-hexyl-3-methylimidazolium tetrafluoroborate	K. R. Seddon, A. S. Stark, M.J. Torres, M. Abraham, L. Moens, Eds., ACS Symposium Series 819, American Chemical Society: Washington DC, 2002, 34-49.	101.325	283.15	2.79239	2.49967	-10.4828	2.57961	-7.62006
1364	training set	1-butyl-3-methylimidazolium tetrafluoroborate	K. R. Harris, M. Kanakubo and L. A. Woolf, J. Chem. Eng. Data, 2007, 52, 2425-2430.	175400	298.15	2.80257	2.78701	-0.55503	2.74186	-2.16611
1365	test set	1-octyl-3-methylimidazolium tetrafluoroborate	K. R. Harris, M. Kanakubo and L. A. Woolf, J. Chem. Eng. Data, 2006, 51, 1161-1167.	50500	298.15	2.80502	2.53739	-9.541	2.63631	-6.01465
1366	test set	1-octyl-3-methylimidazolium tetrafluoroborate	K. R. Harris, M. Kanakubo and L. A. Woolf, J. Chem. Eng. Data, 2006, 51, 1161-1167.	51500	298.15	2.81017	2.54121	-9.57084	2.63966	-6.06745
1367	training set	1-butyl-3-methyl imidazolium acetate	J. M. Crosthwaite, M. J. Muldoon, J. N. K. Dixon, J. L. Anderson and J. F. Brennecke, J. Chem. Thermodyn, 2005, 37, 559-568.	101.325	293	2.81023	2.92654	4.13892	2.59797	-7.55298
1368	training set	1-hexyl-3-methylimidazolium hexafluorophosphate	K. R. Harris, M. Kanakubo, L. A. Bis(trifluoromethylsulfonyl)imide. Woolf, J. Chem. Eng. Data, 2007, 52, 1080-1085.	150100	323.15	2.81624	2.79611	-0.71485	2.7329	-2.95924
1369	test set	1-butyl-3-methylimidazolium tetrafluoroborate	K. R. Harris, M. Kanakubo and L. A. Woolf, J. Chem. Eng. Data, 2007, 52, 2425-2430.	75300	283.15	2.81684	2.65963	-5.58097	2.64523	-6.09225
1370	training set	1-octyl-3-methylimidazolium tetrafluoroborate	K. R. Harris, M. Kanakubo and L. A. Woolf, J. Chem. Eng. Data, 2006, 51, 1161-1167.	100	288.15	2.82802	2.51486	-11.0733	2.81431	-0.48489
1371	training set	1-octyl-3-methylimidazolium tetrafluoroborate	K. R. Harris, M. Kanakubo and L. A. Woolf, J. Chem. Eng. Data, 2006, 51, 1161-1167.	100	288.15	2.82802	2.51486	-11.0733	2.81431	-0.48489
1372	training set	1-hexyl-3-methylimidazolium hexafluorophosphate	A. B. Pereiro and J. L. Legido, J. Chem. Thermodyn., 2007, 39, 1168–1175.	101.325	293.15	2.83047	2.73311	-3.4396	2.82236	-0.28663
1373	training	1-hexyl-3-methylimidazolium hexafluorophosphate	Pereiro, A. B.; Legido, J. L.; Rodriguez, A.; Physical properties of ionic liquids based on 1-alkyl-3-methylimidazolium cation and hexafluorophosphate as anion and temperature dependence; J. Chem. Thermodyn. 39 1168-1175.	101.325	293.15	2.83047	2.73311	-3.43971	2.82236	-0.28675
1374	training	1-octyl-3-methylimidazolium hexafluorophosphate	Baghdadi M, Shemirani F. Cold-induced aggregation microextraction: A novel sample preparation technique based on ionic liquids. Analytica Chimica Acta. 2008. 613, 56-63.	101.325	298.15	2.83378	2.74831	-3.01615	2.97511	4.98704
1375	test set	1-hexyl-3-methylimidazolium hexafluorophosphate	K. R. Harris, M. Kanakubo, L. A. Bis(trifluoromethylsulfonyl)imide. Woolf, J. Chem. Eng. Data, 2007, 52, 1080-1085.	22000	298.15	2.83588	2.73177	-3.67131	2.79297	-1.51314
1376	training set	1-hexyl-3-methylimidazolium hexafluoroborate	K. R. Seddon, A. S. Stark, M.J. Torres, M. Abraham, L. Moens, Eds., ACS Symposium Series 819, American Chemical Society: Washington DC, 2002, 34-49.	101.325	293.15	2.83885	2.73311	-3.72464	2.82236	-0.58098
1377	training	1-hexyl-3-methylimidazolium hexafluorophosphate	Christopher Hardacre, John D. Holbrey, Suhas P. Katdare and Kenneth R. Seddon, Alternating copolymerisation of styrene and carbon monoxide in ionic liquids, Green Chemistry, 4 (2002) 143-146.	101.325	293.15	2.83885	2.73311	-3.72461	2.82236	-0.58095
1378	training set	1-octyl-3-methylimidazolium hexafluorophosphate	A. B. Pereiro and J. L. Legido, J. Chem. Thermodyn., 2007, 39, 1168–1175.	101.325	298.15	2.83923	2.74831	-3.20217	2.97511	4.78568
1379	training set	1-octyl-3-methylimidazolium iodide	M. H. Ghatee, M. Zare, F. Moosavi and A. R. Zolghadr, J. Chem. Eng. Data, 2010, 55, 3084-3088.	101.325	308.15	2.84055	2.57831	-9.23191	2.74867	-3.23466
1380	training	1-propyl-3-methylimidazolium iodide	Satoshi Mikoshiba, Shinji Murai, Hiroyasu Sumino, Takashi Kado, Daisuke Kosugi, Shuzi Hayase, Ionic liquid type dye-sensitized solar cells: increases in photovoltaic performances by adding a small amount of water, Current Applied Physics, 5 (2005) 152-158.	101.325	298.15	2.84198	2.42675	-14.6108	2.6931	-5.23859
1381	training set	1-butyl-3-methylimidazolium chloride	K. R. Seddon, A. S. Stark, M.J. Torres, M. Abraham, L. Moens, Eds., ACS Symposium Series 819, American Chemical Society: Washington DC, 2002, 34-49.	101.325	333.15	2.84323	2.81531	-0.98216	2.70223	-4.95926
1382	training	1-propyl-3-methylimidazolium iodide	Philipp Wachter, Markus Zistler, Christian Schreiner, Matthias Fleischmann, Dirk Gerhard, Peter Wasserscheid,Joseph Barthel, and Heiner J. Gores, Temperature Dependence of the Non-Stokesian Charge Transport in Binary Blends of Ionic Liquids, J. Chem. Eng. Data, 54 (2009) 491-497.	101.325	303.15	2.84323	2.34175	-17.6378	2.73688	-3.7406
1383	training set	1-hexyl-3-methylimidazolium hexafluorophosphate	K. R. Harris, M. Kanakubo, L. A. Bis(trifluoromethylsulfonyl)imide. Woolf, J. Chem. Eng. Data, 2007, 52, 1080-1085.	100	293.15	2.84825	2.73311	-4.04255	2.82235	-0.90922
1384	test set	1-hexyl-3-methylimidazolium hexafluorophosphate	K. R. Harris, M. Kanakubo, L. A. Bis(trifluoromethylsulfonyl)imide. Woolf, J. Chem. Eng. Data, 2007, 52, 1080-1085.	100	293.15	2.84825	2.73311	-4.04255	2.82235	-0.90922
1385	training set	1-hexyl-3-methylimidazolium hexafluorophosphate	D.Tomida, A.Kumagai, S. Kenmochi, K. Qiao, C. Yokoyama, J. Chem. Eng. Data, 2007, 52, 577-579.	100	293.15	2.84942	2.73311	-4.08195	2.82235	-0.94991
1386	training set	1-hexyl-3-methylimidazolium hexafluorophosphate	K. R. Harris, M. Kanakubo, L. A. Bis(trifluoromethylsulfonyl)imide. Woolf, J. Chem. Eng. Data, 2007, 52, 1080-1085.	101400	313.15	2.85022	2.78007	-2.46107	2.88419	1.19171
1387	test	1-octyl-3-methylimidazolium hexafluorophosphate	Liu J F, Jiang G B, Chi Y G, et al. Use of ionic liquids for liquid-phase microextraction of polycyclic aromatic hydrocarbons. Anal. Chem. 2003. 75, 5870-5876.	101.325	298.15	2.85126	2.74831	-3.61052	2.97511	4.34363
1388	training set	1-methyl-3-octylimidazolium hexafluorophosphate	K. R. Harris, M. Kanakubo and L. A. Woolf, J. Chem. Eng. Data, 2006, 51, 1161-1167.	101.325	308.15	2.85509	2.57831	-9.69416	2.74867	-3.72745
1389	training set	1-octyl-3-methylimidazolium tetrafluoroborate	B. Mokhtarani, M. M. Mojtahedi, H. R. Mortaheb, M. Mafi, F. Yazdani and F. Sadeghian, J. Chem. Eng. Data, 2008, 53, 677-682.	101.325	288.15	2.85658	2.51487	-11.9622	2.81431	-1.47976
1390	training set	1-octyl-3-methylimidazolium tetrafluoroborate	K. R. Harris, M. Kanakubo and L. A. Woolf, J. Chem. Eng. Data, 2006, 51, 1161-1167.	60800	298.15	2.85739	2.57674	-9.82194	2.67645	-6.33242
1391	test	1-butyl-3-methylimidazolium chloride	Jacqueline A. Whitehead, Geoffrey A. Lawrance, Adam McCluskey, Analysis of Gold in Solutions Containing Ionic Liquids by inductively coupled plasma atomic emission spectrometry, Aust. J. Chem., 57 (2004) 151-155.	101.325	323.15	2.86332	2.98531	4.26016	3.03292	5.92296
1392	training set	1-methyl-3-octylimidazolium hexafluorophosphate	K. R. Harris, M. Kanakubo and L. A. Woolf, J. Chem. Eng. Data, 2006, 51, 1161-1167.	101.325	298.15	2.86427	2.74831	-4.04839	2.97511	3.86962
1393	test set	1-octyl-3-methyl imidazolium tetrafluoroborate	K. R. Harris, M. Kanakubo and L. A. Woolf, J. Chem. Eng. Data, 2006, 51, 1161-1167.	124400	308.15	2.86433	2.64969	-7.49352	2.80863	-1.94476
1394	training set	1-octyl-3-methylimidazolium hexafluorophosphate	K. R. Harris, M. Kanakubo and L. A. Woolf, J. Chem. Eng. Data, 2006, 51, 1161-1167.	101.325	298.15	2.86593	2.74831	-4.10397	2.97511	3.80946
1395	training set	1-butyl-3-methylimidazolium hexafluorophosphate	K. R. Harris, L. A. Woolf and M. Kanakubo, J. Chem. Eng. Data, 2005, 50, 1777-1782.	125200	308.15	2.87506	2.82869	-1.6127	3.04828	6.02476
1396	test set	1-hexyl-3-methylimidazolium hexafluoroborate	D.Tomida, A.Kumagai, S. Kenmochi, K. Qiao, C. Yokoyama, J. Chem. Eng. Data, 2007, 52, 577-579.	5000	293.15	2.87679	2.75183	-4.34387	2.83472	-1.46241
1397	training set	1-butyl-3-methylimidazolium hexafluorophosphate	K. R. Harris, L. A. Woolf and M. Kanakubo, J. Chem. Eng. Data, 2005, 50, 1777-1782.	100	283.15	2.87795	2.77581	-3.54898	2.69217	-6.45527
1398	training set	1-butyl-3-methylimidazolium hexafluorophosphate	K. R. Harris, L. A. Woolf and M. Kanakubo, J. Chem. Eng. Data, 2005, 50, 1777-1782.	75800	298.15	2.88138	2.80999	-2.47777	2.83744	-1.52481
1399	test set	1-hexyl-3-methylimidazolium iodide	M. H. Ghatee, M. Zare, F. Moosavi and A. R. Zolghadr, J. Chem. Eng. Data, 2010, 55, 3084-3088.	101.325	305.15	2.88756	2.52911	-12.4135	2.628	-8.989
1400	training set	1-butyl-3-methylimidazolium hexafluorophosphate	K. R. Harris, L. A. Woolf and M. Kanakubo, J. Chem. Eng. Data, 2005, 50, 1777-1782.	224600	323.15	2.89432	2.9534	2.04131	2.84605	-1.66763
1401	training set	1-hexyl-3-methylimidazolium hexafluorophosphate	D.Tomida, A.Kumagai, S. Kenmochi, K. Qiao, C. Yokoyama, J. Chem. Eng. Data, 2007, 52, 577-579.	10000	293.15	2.90255	2.77093	-4.53477	2.84448	-2.00072
1402	training set	1-butyl-3-methylimidazolium hexafluorophosphate	W. Fan, Q. Zhou, J. Sun and S. J. Zhang, J. Chem. Eng. Data, 2009, 54, 2307-2311.	101.325	283.15	2.90422	2.77582	-4.42125	2.69217	-7.30134
1403	training set	1-butyl-3-methylimidazolium nitrate	K. R. Seddon, A. S. Stark, M.J. Torres, M. Abraham, L. Moens, Eds., ACS Symposium Series 819, American Chemical Society: Washington DC, 2002, 34-49.	101.325	293.15	2.90526	2.70781	-6.79629	2.77589	-4.45282
1404	training set	1-butyl-3-methylimidazolium tetrafluoroborate	K. R. Harris, M. Kanakubo and L. A. Woolf, J. Chem. Eng. Data, 2007, 52, 2425-2430.	200900	298.15	2.90757	2.88442	-0.79603	2.69611	-7.2728
1405	training set	1-ethyl-3-methyl imidazolium hydrogen sulfate	A. J. L. Costa, J. M. S. S. Esperança, I. M. Marrucho and L. s. P. N. Rebelo, J. Chem. Eng. Data, 2011, 56, 3433-3441.	101.325	308.15	2.91756	2.92029	0.09368	2.97298	1.89958
1406	training set	1-hexyl-3-methylimidazolium hexafluorophosphate	K. R. Harris, M. Kanakubo, L. A. Bis(trifluoromethylsulfonyl)imide. Woolf, J. Chem. Eng. Data, 2007, 52, 1080-1085.	174800	323.15	2.92947	2.89046	-1.33157	2.76398	-5.64912
1407	training set	1-methyl-3-octylimidazolium hexafluorophosphate	K. R. Harris, M. Kanakubo and L. A. Woolf, J. Chem. Eng. Data, 2006, 51, 1161-1167.	101.325	298.15	2.93131	2.74831	-6.24284	2.97511	1.49409
1408	training set	1-butyl-3-methylimidazolium octylsulfate	M.J. Davila, S. Aparicio, R. Alcalde, B. Garcia, J.M. Leal, Green Chem., 2007, 9, 221–232.	101.325	293.15	2.93247	2.10922	-28.0735	2.74783	-6.29655
1409	training set	1-octyl-3-methylimidazolium hexafluorophosphate	K. R. Seddon, A. S. Stark, M.J. Torres, M. Abraham, L. Moens, Eds., ACS Symposium Series 819, American Chemical Society: Washington DC, 2002, 34-49.	101.325	293.15	2.93752	2.83331	-3.54745	3.07698	4.74759
1410	training set	1-hexyl-3-methylimidazolium hexafluorophosphate	D.Tomida, A.Kumagai, S. Kenmochi, K. Qiao, C. Yokoyama, J. Chem. Eng. Data, 2007, 52, 577-579.	15000	293.15	2.93902	2.79003	-5.06951	2.85189	-2.96448
1411	training set	1-butyl-3-methyl imidazolium octylsulfate	P. Wasserscheid, R. van Hal and A. Bosmann, Green Chem., 2002, 4, 400-404.	101.325	293.1	2.94176	2.11007	-28.2718	2.74937	-6.53995
1412	training set	1-butyl-3-methylimidazolium tetrafluoroborate	K. R. Harris, M. Kanakubo and L. A. Woolf, J. Chem. Eng. Data, 2007, 52, 2425-2430.	100600	283.15	2.94201	2.75628	-6.31306	2.73021	-7.19912
1413	test	1-propyl-3-methylimidazolium iodide	Mikhail Gorlov and Lars Kloo，Ionic liquid electrolytes for dye-sensitized solar cells，Dalton Trans., 2008, 2655–2666	101.325	295.15	2.94448	2.47775	-15.8511	2.63878	-10.3824
1414	training set	1-octyl-3-methyl imidazolium tetrafluoroborate	K. R. Seddon, A. S. Stark, M.J. Torres, M. Abraham, L. Moens, Eds., ACS Symposium Series 819, American Chemical Society: Washington DC, 2002, 34-49.	101.325	283.1	2.95279	2.60072	-11.9233	2.93738	-0.522
1415	training set	1-butyl-3-methylimidazolium hexafluorophosphate	K. R. Harris, L. A. Woolf and M. Kanakubo, J. Chem. Eng. Data, 2005, 50, 1777-1782.	140600	308.15	2.95328	2.88752	-2.22661	3.11081	5.33413
1416	training set	1-octyl-3-methylimidazolium tetrafluoroborate	K. R. Harris, M. Kanakubo and L. A. Woolf, J. Chem. Eng. Data, 2006, 51, 1161-1167.	80200	298.15	2.95535	2.65085	-10.3034	2.77724	-6.02683
1417	test set	1-hexyl-3-methylimidazolium hexafluorophosphate	K. R. Harris, M. Kanakubo, L. A. Bis(trifluoromethylsulfonyl)imide. Woolf, J. Chem. Eng. Data, 2007, 52, 1080-1085.	42100	298.15	2.9627	2.80855	-5.20309	2.83659	-4.25663
1418	training set	Trihexyl(tetradecyl)phosphonium chloride	D. Morgan, L. Ferguson and P. Scovazzo, Industrial & Engineering Chemistry Research, 2005, 44, 4815-4823.	101.325	303.15	2.96332	4.67025	57.6018	3.10522	4.78871
1419	test set	1-octyl-3-methylimidazolium chloride	K. R. Seddon, A. S. Stark, M.J. Torres, M. Abraham, L. Moens, Eds., ACS Symposium Series 819, American Chemical Society: Washington DC, 2002, 34-49.	101.325	333.15	2.96708	3.0428	2.55204	2.76448	-6.82823
1420	training set	1-octyl-3-methylimidazolium iodide	M. H. Ghatee, M. Zare, F. Moosavi and A. R. Zolghadr, J. Chem. Eng. Data, 2010, 55, 3084-3088.	101.325	303.15	2.9709	2.66331	-10.3533	2.86691	-3.50025
1421	training set	1-hexyl-3-methylimidazolium hexafluorophosphate	K. R. Harris, M. Kanakubo, L. A. Bis(trifluoromethylsulfonyl)imide. Woolf, J. Chem. Eng. Data, 2007, 52, 1080-1085.	125200	313.15	2.9728	2.87099	-3.42472	2.96035	-0.41877
1422	training	1-hexyl-3-methylimidazolium bis(trifluoromethylsulfonyl)imide	Jason A. Widegren and Joseph W. Magee, Density, Viscosity, Speed of Sound, and Electrolytic Conductivity for the Ionic Liquid 1-hexyl-3-methylimidazolium Bis(trifluoromethylsulfonyl)imide and Its Mixtures with Water, J. Chem. Eng. Data, 52 (2007) 2331-2338.	101.325	258.15	2.97396	2.72932	-8.22597	2.76268	-7.10429
1423	training set	1-hexyl-3-methyl imidazolium chloride	E. Gómez, B. González, A. Domínguez, E. Tojo, J. Tojo, J. Chem. Eng. Data, 2006, 51, 696-701.	101.325	328.15	2.9741	3.0276	1.7989	2.96482	-0.31193
1424	training set	1-octyl-3-methylimidazolium tetrafluoroborate	K. R. Harris, M. Kanakubo and L. A. Woolf, J. Chem. Eng. Data, 2006, 51, 1161-1167.	150200	308.15	2.97566	2.74825	-7.64244	2.80518	-5.72904
1425	training set	1-hexyl-3-methylimidazolium hexafluoroborate	D.Tomida, A.Kumagai, S. Kenmochi, K. Qiao, C. Yokoyama, J. Chem. Eng. Data, 2007, 52, 577-579.	20000	293.15	2.97909	2.80913	-5.70523	2.85764	-4.07667
1426	training set	1-octyl-3-methylimidazolium tetrafluoroborate	K. R. Harris, M. Kanakubo and L. A. Woolf, J. Chem. Eng. Data, 2006, 51, 1161-1167.	100	283.15	2.99211	2.59986	-13.1093	2.93618	-1.86939
1427	training set	1-octyl-3-methyl imidazolium tetrafluoroborate	K. R. Harris, M. Kanakubo and L. A. Woolf, J. Chem. Eng. Data, 2006, 51, 1161-1167.	100	283.15	2.99211	2.59986	-13.1093	2.93618	-1.86939
1428	training set	1-butyl-3-methylimidazolium hexafluorophosphate	K. R. Harris, L. A. Woolf and M. Kanakubo, J. Chem. Eng. Data, 2005, 50, 1777-1782.	249300	323.15	2.99782	3.04776	1.66574	2.78607	-7.06336
1429	training set	1-methyl-3-octylimidazolium hexafluorophosphate	A. B. Pereiro and J. L. Legido, J. Chem. Thermodyn., 2007, 39, 1168–1175.	101.325	293.15	2.9996	2.83331	-5.54364	3.07698	2.57972
1430	training set	1-octyl-3-methylimidazolium hexafluorophosphate	K. R. Harris, M. Kanakubo and L. A. Woolf, J. Chem. Eng. Data, 2006, 51, 1161-1167.	101.325	308.15	3.00346	2.57831	-14.1552	2.74867	-8.48328
1431	test set	1-butyl-3-methylimidazolium hexafluorophosphate	K. R. Harris, L. A. Woolf and M. Kanakubo, J. Chem. Eng. Data, 2005, 50, 1777-1782.	151000	308.15	3.00689	2.92725	-2.64858	3.13967	4.41598
1432	training	Trihexyl-tetradecylphosphonium tetrafluoroborate	Breitbach Z S, Armstrong D W. Characterization of phosphonium ionic liquids through a linear solvation energy relationship and their use as glc stationary phases. Anal. Bioanal. Chem. 2008. 390, 1605- 1617.	101.325	303.15	3.00915	3.37732	12.2348	2.79828	-7.00772
1433	training	1-propyl-3-methylimidazolium iodide	Philipp Wachter, Markus Zistler, Christian Schreiner, Matthias Fleischmann, Dirk Gerhard, Peter Wasserscheid,Joseph Barthel, and Heiner J. Gores, Temperature Dependence of the Non-Stokesian Charge Transport in Binary Blends of Ionic Liquids, J. Chem. Eng. Data, 54 (2009) 491-497.	101.325	298.15	3.00988	2.42675	-19.3738	2.6931	-10.5244
1434	training set	1-hexyl-3-methylimidazolium hexafluorophosphate	K. R. Harris, M. Kanakubo, L. A. Bis(trifluoromethylsulfonyl)imide. Woolf, J. Chem. Eng. Data, 2007, 52, 1080-1085.	100	288.15	3.01494	2.81811	-6.52855	2.92124	-3.10785
1435	test	N-methyl-butylmorpholinium trifluoromethyltrifluoroborate	Zhou Z B, Matsumoto H, Tatsumi K. Cyclic quaternary ammonium ionic liquids with perfluoroalkyltrifluoroborates: Synthesis, characterization, and properties. Chem. Eur. J. 2006. 12, 2196-2212.	101.325	298.15	3.01494	2.01798	-33.0672	2.46551	-18.2236
1436	training set	1-hexyl-3-methylimidazolium hexafluorophosphate	K. R. Harris, M. Kanakubo, L. A. Bis(trifluoromethylsulfonyl)imide. Woolf, J. Chem. Eng. Data, 2007, 52, 1080-1085.	100	288.15	3.01536	2.81811	-6.54157	2.92124	-3.12135
1437	training set	1-octyl-3-methyl imidazolium tetrafluoroborate	B. Mokhtarani, M. M. Mojtahedi, H. R. Mortaheb, M. Mafi, F. Yazdani and F. Sadeghian, J. Chem. Eng. Data, 2008, 53, 677-682.	101.325	283.15	3.01577	2.59987	-13.7908	2.93618	-2.6392
1438	training set	1-octyl-3-methylimidazolium hexafluorophosphate	K. R. Harris, M. Kanakubo and L. A. Woolf, J. Chem. Eng. Data, 2006, 51, 1161-1167.	101.325	298.15	3.01745	2.74831	-8.91935	2.97511	-1.40329
1439	training set	1-butyl-3-methylimidazolium hexafluorophosphate	K. R. Harris, L. A. Woolf and M. Kanakubo, J. Chem. Eng. Data, 2005, 50, 1777-1782.	100300	298.15	3.01995	2.90358	-3.85351	3.0151	-0.16069
1440	training	1-butyl-3-methylimidazolium chloride	Qinglin Kuang, Jun Zhang, and Zhigang Wang, Revealing Long-Range Density Fluctuations in Dialkylimidazolium Chloride Ionic Liquids by Dynamic Light Scattering, J. Phys. Chem. B, 111 (2007) 9858-9863.	101.325	318	3.02119	3.07286	1.71011	3.19849	5.86856
1441	training set	1-methyl-3-octylimidazolium hexafluorophosphate	K. R. Harris, M. Kanakubo and L. A. Woolf, J. Chem. Eng. Data, 2006, 51, 1161-1167.	101.325	293.15	3.02735	2.83331	-6.40946	3.07698	1.63943
1442	training set	1-octyl-3-methylimidazolium chloride	E. Gómez, B. González, A. Domínguez, E. Tojo, J. Tojo, J. Chem. Eng. Data, 2006, 51, 696-701.	101.325	328.15	3.03782	3.1278	2.96203	2.91477	-4.0505
1443	training set	1-butyl-3-methylimidazolium iodide	J. G. Huddleston, A. E. Visser, W. M. Reichert, H. D. Willauer, G. A. Broker and R. D. Rogers, Green Chem., 2001, 3, 156-164	101.325	298.1	3.04532	2.52167	-17.1953	2.45025	-19.5405
1444	training set	1-butyl-3-methylimidazolium hexafluorophosphate	K. R. Harris, L. A. Woolf and M. Kanakubo, J. Chem. Eng. Data, 2005, 50, 1777-1782.	100	278.15	3.04883	2.86081	-6.16689	2.9389	-3.60569
1445	training set	1-hexyl-3-methyl imidazolium chloride	K. R. Seddon, A. S. Stark, M.J. Torres, M. Abraham, L. Moens, Eds., ACS Symposium Series 819, American Chemical Society: Washington DC, 2002, 34-49.	101.325	323.15	3.05077	3.1126	2.02674	3.12824	2.53941
1446	training set	1-octyl-3-methylimidazolium tetrafluoroborate	K. R. Harris, M. Kanakubo and L. A. Woolf, J. Chem. Eng. Data, 2006, 51, 1161-1167.	100200	298.15	3.05308	2.72725	-10.6723	2.87835	-5.72303
1447	training set	1-ethyl-3-methyl imidazolium hydrogen sulfate	A. J. L. Costa, J. M. S. S. Esperança, I. M. Marrucho and L. s. P. N. Rebelo, J. Chem. Eng. Data, 2011, 56, 3433-3441.	101.325	303.15	3.05873	3.00529	-1.74703	3.11896	1.96913
1448	training set	1-hexyl-3-methylimidazolium hexafluorophosphate	K. R. Harris, M. Kanakubo, L. A. Bis(trifluoromethylsulfonyl)imide. Woolf, J. Chem. Eng. Data, 2007, 52, 1080-1085.	60300	298.15	3.07555	2.87807	-6.4209	2.90382	-5.58383
1449	training set	1-octyl-3-methylimidazolium iodide	M. H. Ghatee, M. Zare, F. Moosavi and A. R. Zolghadr, J. Chem. Eng. Data, 2010, 55, 3084-3088.	101.325	300.15	3.09517	2.71431	-12.3049	2.93301	-5.23908
1450	training set	1-butyl-3-methyl imidazolium octylsulfate	M.J. Davila, S. Aparicio, R. Alcalde, B. Garcia, J.M. Leal, Green Chem., 2007, 9, 221–232.	101.325	288.15	3.09764	2.19422	-29.1647	2.88655	-6.8145
1451	training set	1-hexyl-3-methylimidazolium hexafluorophosphate	K. R. Harris, M. Kanakubo, L. A. Bis(trifluoromethylsulfonyl)imide. Woolf, J. Chem. Eng. Data, 2007, 52, 1080-1085.	150000	313.15	3.0983	2.96573	-4.27893	2.99445	-3.35178
1452	test set	1-octyl-3-methylimidazolium hexafluorophosphate	K. R. Harris, M. Kanakubo and L. A. Woolf, J. Chem. Eng. Data, 2006, 51, 1161-1167.	101.325	298.15	3.11361	2.74831	-11.7323	2.97511	-4.44833
1453	training set	1-octyl-3-methylimidazolium tetrafluoroborate	K. R. Harris, M. Kanakubo and L. A. Woolf, J. Chem. Eng. Data, 2006, 51, 1161-1167.	116700	298.15	3.13322	2.79028	-10.9454	2.92405	-6.67574
1454	training set	1-octyl-3-methylimidazolium tetrafluoroborate	K. R. Harris, M. Kanakubo and L. A. Woolf, J. Chem. Eng. Data, 2006, 51, 1161-1167.	117500	298.15	3.13704	2.79333	-10.9564	2.92506	-6.75739
1455	test set	1-butyl-3-methylimidazolium hexafluorophosphate	K. R. Harris, L. A. Woolf and M. Kanakubo, J. Chem. Eng. Data, 2005, 50, 1777-1782.	125100	298.15	3.15594	2.99831	-4.99465	3.15607	0.00409
1456	training set	1-hexyl-3-methylimidazolium hexafluorophosphate	K. R. Seddon, A. S. Stark, M.J. Torres, M. Abraham, L. Moens, Eds., ACS Symposium Series 819, American Chemical Society: Washington DC, 2002, 34-49.	101.325	283.15	3.15655	2.90311	-8.02892	3.06768	-2.81548
1457	training set	1-butyl-3-methylimidazolium hexafluorophosphate	K. R. Harris, L. A. Woolf and M. Kanakubo, J. Chem. Eng. Data, 2005, 50, 1777-1782.	125600	298.15	3.16465	3.00022	-5.19577	3.15836	-0.1988
1458	training set	1-octyl-3-methylimidazolium tetrafluoroborate	K. R. Harris, M. Kanakubo and L. A. Woolf, J. Chem. Eng. Data, 2006, 51, 1161-1167.	100	278.15	3.16938	2.68486	-15.2874	3.05134	-3.7244
1459	training set	1-octyl-3-methylimidazolium tetrafluoroborate	K. R. Harris, M. Kanakubo and L. A. Woolf, J. Chem. Eng. Data, 2006, 51, 1161-1167.	100	278.15	3.16967	2.68486	-15.2951	3.05134	-3.73321
1460	test set	1-octyl-3-methylimidazolium tetrafluoroborate	K. R. Harris, M. Kanakubo and L. A. Woolf, J. Chem. Eng. Data, 2006, 51, 1161-1167.	200100	308.15	3.18384	2.93886	-7.69433	2.69077	-15.4866
1461	training set	1-butyl-3-methylimidazolium chloride	K. R. Seddon, A. S. Stark, M.J. Torres, M. Abraham, L. Moens, Eds., ACS Symposium Series 819, American Chemical Society: Washington DC, 2002, 34-49.	101.325	323.15	3.18583	2.98531	-6.29428	3.03292	-4.7998
1462	test set	1-hexyl-3-methylimidazolium hexafluorophosphate	K. R. Harris, M. Kanakubo, L. A. Bis(trifluoromethylsulfonyl)imide. Woolf, J. Chem. Eng. Data, 2007, 52, 1080-1085.	100	283.15	3.19451	2.90311	-9.12196	3.06767	-3.97041
1463	training set	1-hexyl-3-methylimidazolium hexafluorophosphate	K. R. Harris, M. Kanakubo, L. A. Bis(trifluoromethylsulfonyl)imide. Woolf, J. Chem. Eng. Data, 2007, 52, 1080-1085.	100	283.15	3.19479	2.90311	-9.12993	3.06767	-3.97883
1464	training set	1-hexyl-3-methylimidazolium hexafluorophosphate	K. R. Harris, M. Kanakubo, L. A. Bis(trifluoromethylsulfonyl)imide. Woolf, J. Chem. Eng. Data, 2007, 52, 1080-1085.	80300	298.15	3.19645	2.95447	-7.57021	3.0053	-5.97994
1465	test set	1-ethyl-3-methyl imidazolium hydrogen sulfate	A. J. L. Costa, J. M. S. S. Esperança, I. M. Marrucho and L. s. P. N. Rebelo, J. Chem. Eng. Data, 2011, 56, 3433-3441.	101.325	298.15	3.21176	3.09029	-3.78194	3.2401	0.88244
1466	training set	1-butyl-3-methyl imidazolium acetate	J. M. Crosthwaite, M. J. Muldoon, J. N. K. Dixon, J. L. Anderson and J. F. Brennecke, J. Chem. Thermodyn, 2005, 37, 559-568.	101.325	283	3.21219	3.09654	-3.60025	3.03457	-5.52959
1467	training set	1-butyl-3-methylimidazolium hexafluorophosphate	K. R. Harris, L. A. Woolf and M. Kanakubo, J. Chem. Eng. Data, 2005, 50, 1777-1782.	100	273.15	3.23477	2.94581	-8.93288	3.25896	0.74786
1468	training set	1-butyl-3-methylimidazolium nitrate	K. R. Seddon, A. S. Stark, M.J. Torres, M. Abraham, L. Moens, Eds., ACS Symposium Series 819, American Chemical Society: Washington DC, 2002, 34-49.	101.325	283.15	3.26505	2.87781	-11.8602	3.05367	-6.47397
1469	training set	1-methyl-3-octylimidazolium hexafluorophosphate	K. R. Seddon, A. S. Stark, M.J. Torres, M. Abraham, L. Moens, Eds., ACS Symposium Series 819, American Chemical Society: Washington DC, 2002, 34-49.	101.325	283.15	3.2667	3.00331	-8.06278	3.3081	1.26738
1470	test set	1-butyl-3-methylimidazolium octylsulfate	M.J. Davila, S. Aparicio, R. Alcalde, B. Garcia, J.M. Leal, Green Chem., 2007, 9, 221–232.	101.325	283.15	3.27393	2.27922	-30.3827	2.9754	-9.11844
1471	training set	1-octyl-3-methylimidazolium chloride	K. R. Seddon, A. S. Stark, M.J. Torres, M. Abraham, L. Moens, Eds., ACS Symposium Series 819, American Chemical Society: Washington DC, 2002, 34-49.	101.325	323.15	3.28556	3.2128	-2.21451	3.07375	-6.44659
1472	training set	1-butyl-3-methylimidazolium hexafluorophosphate	K. R. Harris, L. A. Woolf and M. Kanakubo, J. Chem. Eng. Data, 2005, 50, 1777-1782.	150300	298.15	3.29994	3.09458	-6.22326	3.23557	-1.95072
1473	training set	1-hexyl-3-methylimidazolium hexafluorophosphate	K. R. Harris, M. Kanakubo, L. A. Bis(trifluoromethylsulfonyl)imide. Woolf, J. Chem. Eng. Data, 2007, 52, 1080-1085.	100100	298.15	3.31471	3.03011	-8.58603	3.10366	-6.36708
1474	training	Trihexyl-tetradecylphosphonium chloride	Cieniecka-Roslonkiewicz Anna, Pernak Juliusz, Kubis-Feder Joanna, et al. Synthesis, anti-microbial activities and anti-electrostatic properties of phosphonium-based ionic liquids. Green Chem. 2005. 7, 855-862.	101.325	303.15	3.31763	4.67025	40.7707	3.10522	-6.40222
1475	training set	1-octyl-3-methylimidazolium tetrafluoroborate	K. R. Harris, M. Kanakubo and L. A. Woolf, J. Chem. Eng. Data, 2006, 51, 1161-1167.	100	273.15	3.35965	2.76986	-17.555	3.14779	-6.30609
1476	training set	1-octyl-3-methylimidazolium tetrafluoroborate	K. R. Harris, M. Kanakubo and L. A. Woolf, J. Chem. Eng. Data, 2006, 51, 1161-1167.	100	273.15	3.36003	2.76986	-17.5643	3.14779	-6.31669
1477	test set	1-ethyl-3-methyl imidazolium hydrogen sulfate	A. J. L. Costa, J. M. S. S. Esperança, I. M. Marrucho and L. s. P. N. Rebelo, J. Chem. Eng. Data, 2011, 56, 3433-3441.	101.325	293.15	3.37838	3.17529	-6.01137	3.32053	-1.71251
1478	training set	1-hexyl-3-methylimidazolium hexafluorophosphate	K. R. Harris, M. Kanakubo, L. A. Bis(trifluoromethylsulfonyl)imide. Woolf, J. Chem. Eng. Data, 2007, 52, 1080-1085.	100	278.15	3.38525	2.98811	-11.7315	3.2681	-3.46053
1479	training set	1-octyl-3-methylimidazolium hexafluorophosphate	K. R. Harris, M. Kanakubo and L. A. Woolf, J. Chem. Eng. Data, 2006, 51, 1161-1167.	101.325	283.15	3.38721	3.00331	-11.3337	3.3081	-2.33551
1480	training set	1-hexyl-3-methylimidazolium chloride	K. R. Seddon, A. S. Stark, M.J. Torres, M. Abraham, L. Moens, Eds., ACS Symposium Series 819, American Chemical Society: Washington DC, 2002, 34-49.	101.325	313.15	3.40535	3.2826	-3.60459	3.48316	2.2849
1481	training set	1-butyl-3-methylimidazolium hexafluorophosphate	K. R. Harris, L. A. Woolf and M. Kanakubo, J. Chem. Eng. Data, 2005, 50, 1777-1782.	174100	298.15	3.4304	3.18549	-7.13934	3.21871	-6.17103
1482	training set	1-hexyl-3-methylimidazolium chloride	E. Gómez, B. González, A. Domínguez, E. Tojo, J. Tojo, J. Chem. Eng. Data, 2006, 51, 696-701.	101.325	313.15	3.53517	3.2826	-7.14446	3.48316	-1.47125
1483	training set	1-ethyl-3-methyl imidazolium hydrogen sulfate	A. J. L. Costa, J. M. S. S. Esperança, I. M. Marrucho and L. s. P. N. Rebelo, J. Chem. Eng. Data, 2011, 56, 3433-3441.	101.325	288.15	3.5605	3.26029	-8.43159	3.34881	-5.94543
1484	training set	1-butyl-3-methylimidazolium chloride	K. R. Seddon, A. S. Stark, M.J. Torres, M. Abraham, L. Moens, Eds., ACS Symposium Series 819, American Chemical Society: Washington DC, 2002, 34-49.	101.325	313.15	3.57978	3.15531	-11.8576	3.36831	-5.90723
1485	training set	1-octyl-3-methylimidazolium hexafluorophosphate	K. R. Harris, M. Kanakubo and L. A. Woolf, J. Chem. Eng. Data, 2006, 51, 1161-1167.	101.325	278.15	3.58984	3.08831	-13.9707	3.45034	-3.88602
1486	training set	1-hexyl-3-methylimidazolium hexafluorophosphate	K. R. Harris, M. Kanakubo, L. A. Bis(trifluoromethylsulfonyl)imide. Woolf, J. Chem. Eng. Data, 2007, 52, 1080-1085.	100	273.15	3.59373	3.07311	-14.487	3.49994	-2.60982
1487	training	1-butyl-3-methylimidazolium chloride	Qinglin Kuang, Jun Zhang, and Zhigang Wang, Revealing Long-Range Density Fluctuations in Dialkylimidazolium Chloride Ionic Liquids by Dynamic Light Scattering, J. Phys. Chem. B, 111 (2007) 9858-9863.	101.325	303	3.5966	3.32786	-7.47212	3.83778	6.70584
1488	training set	1-octyl-3-methylimidazolium chloride	E. Gómez, B. González, A. Domínguez, E. Tojo, J. Tojo, J. Chem. Eng. Data, 2006, 51, 696-701.	101.325	313.15	3.60917	3.3828	-6.27205	3.4442	-4.57093
1489	training set	1-octyl-3-methylimidazolium chloride	K. R. Seddon, A. S. Stark, M.J. Torres, M. Abraham, L. Moens, Eds., ACS Symposium Series 819, American Chemical Society: Washington DC, 2002, 34-49.	101.325	313.15	3.65552	3.3828	-7.46047	3.4442	-5.78092
1490	test set	1-ethyl-3-methyl imidazolium hydrogen sulfate	A. J. L. Costa, J. M. S. S. Esperança, I. M. Marrucho and L. s. P. N. Rebelo, J. Chem. Eng. Data, 2011, 56, 3433-3441.	101.325	283.15	3.76017	3.34529	-11.0335	3.32086	-11.6831
1491	training set	1-methyl-3-octylimidazolium hexafluorophosphate	K. R. Harris, M. Kanakubo and L. A. Woolf, J. Chem. Eng. Data, 2006, 51, 1161-1167.	101.325	273.15	3.80686	3.17331	-16.6422	3.59504	-5.56412
1492	training set	1-hexyl-3-methyl imidazolium chloride	K. R. Seddon, A. S. Stark, M.J. Torres, M. Abraham, L. Moens, Eds., ACS Symposium Series 819, American Chemical Society: Washington DC, 2002, 34-49.	101.325	303.15	3.80726	3.4526	-9.31533	3.9641	4.11952
1493	test set	1-octyl-3-methylimidazolium chloride	K. R. Seddon, A. S. Stark, M.J. Torres, M. Abraham, L. Moens, Eds., ACS Symposium Series 819, American Chemical Society: Washington DC, 2002, 34-49.	101.325	303.15	4.03222	3.5528	-11.8897	3.93469	-2.41881
1494	training set	1-butyl-3-methylimidazolium chloride	K. R. Seddon, A. S. Stark, M.J. Torres, M. Abraham, L. Moens, Eds., ACS Symposium Series 819, American Chemical Society: Washington DC, 2002, 34-49.	101.325	303.15	4.04139	3.32531	-17.7188	3.82945	-5.24428
1495	test set	1-hexyl-3-methyl imidazolium chloride	K. R. Seddon, A. S. Stark, M.J. Torres, M. Abraham, L. Moens, Eds., ACS Symposium Series 819, American Chemical Society: Washington DC, 2002, 34-49.	101.325	293.15	4.25527	3.6226	-14.8679	4.56205	7.20944
1496	training set	1-hexyl-3-methyl imidazolium chloride	E. Gómez, B. González, A. Domínguez, E. Tojo, J. Tojo, J. Chem. Eng. Data, 2006, 51, 696-701.	101.325	298.15	4.25741	3.5376	-16.9072	4.25936	0.04571
1497	training set	1-octyl-3-methylimidazolium chloride	E. Gómez, B. González, A. Domínguez, E. Tojo, J. Tojo, J. Chem. Eng. Data, 2006, 51, 696-701.	101.325	298.15	4.31979	3.6378	-15.7875	4.21631	-2.39558
1498	training set	1-octyl-3-methyl imidazolium chloride	K. R. Seddon, A. S. Stark, M.J. Torres, M. Abraham, L. Moens, Eds., ACS Symposium Series 819, American Chemical Society: Washington DC, 2002, 34-49.	101.325	293.15	4.51943	3.7228	-17.6268	4.49018	-0.6472
1499	test set	1-butyl-3-methylimidazolium chloride	K. R. Seddon, A. S. Stark, M.J. Torres, M. Abraham, L. Moens, Eds., ACS Symposium Series 819, American Chemical Society: Washington DC, 2002, 34-49.	101.325	293.15	4.61162	3.49531	-24.2066	4.44008	-3.71984
1500	training set	1-hexyl-3-methylimidazolium chloride	K. R. Seddon, A. S. Stark, M.J. Torres, M. Abraham, L. Moens, Eds., ACS Symposium Series 819, American Chemical Society: Washington DC, 2002, 34-49.	101.325	283.15	4.79975	3.7926	-20.9834	5.01216	4.42554
1501	training set	1-octyl-3-methylimidazolium chloride	K. R. Seddon, A. S. Stark, M.J. Torres, M. Abraham, L. Moens, Eds., ACS Symposium Series 819, American Chemical Society: Washington DC, 2002, 34-49.	101.325	283.15	5.06819	3.8928	-23.1915	4.85656	-4.17568
1502	training set	1-butyl-3-methylimidazolium chloride	K. R. Seddon, A. S. Stark, M.J. Torres, M. Abraham, L. Moens, Eds., ACS Symposium Series 819, American Chemical Society: Washington DC, 2002, 34-49.	101.325	283.15	5.15229	3.66531	-28.8607	4.94123	-4.09634
